# Supplementary material for: Effects of ADARs on small RNA processing pathways in C. elegans
Source: HighWire-hosted journal article supplement (doi:10.1101/gr.134841.111), 2012-06-06
Supplement: S_Table1.xlsx [file S_Table1.xlsx]

## Sheet: DefRegScanSeqs
Mutant	miRNA	Chromosome	Strand	miRNA chr start position	miRNA chr stop position	Normalized # of ADAR mutant reads	Normalized # of WT reads	Fold change (ADAR mutant vs WT)	pVal
adr-1;adr-2	miR-2214	chrIII	+	7278641	7278704	6	17	-2.77778	0.0171147
adr-1;adr-2	miR-253	chrV	-	5780515	5780579	2349	6386	-2.7027	1e-100
adr-1	miR-1828	chrI	+	10600451	10600514	13	28	-2.12766	0.0468928
adr-1	miR-85	chrII	+	8393506	8393571	32796	66205	-2	1e-100
adr-1	miR-62	chrX	+	12692527	12692584	11574	21081	-1.81818	1e-100
adr-1	miR-231	chrIII	-	7544996	7545062	6278	10788	-1.72414	1e-100
adr-1	miR-236	chrII	-	7030134	7030198	1862	3149	-1.69492	2.35e-47
adr-1;adr-2	miR-240	chrX	+	7882588	7882648	2500	4119	-1.63934	4.32e-99
adr-1;adr-2	miR-1829b	chrX	+	14977039	14977099	56	88	-1.5873	0.0026047
adr-1;adr-2	miR-246	chrIV	+	10940122	10940184	3518	5516	-1.5625	1e-100
adr-1	miR-239a	chrX	+	11792384	11792448	10286	15872	-1.53846	1e-100
adr-1	miR-799	chrX	-	8600598	8600659	894	1368	-1.53846	2.43e-15
adr-2	miR-242	chrX	+	5803868	5803934	4425	6684	-1.51515	1e-100
adr-2	miR-250	chrV	-	5780515	5780579	4306	6386	-1.49254	7.26e-92
adr-1	miR-71	chrI	-	9379938	9379996	250593	372573	-1.49254	1e-100
adr-1	miR-76	chrIII	+	3142050	3142116	159	238	-1.49254	0.00109051
adr-1	miR-1020	chrIII	-	10047640	10047709	213	312	-1.47059	0.00041054
adr-1	miR-79	chrI	+	9332955	9333018	1909	2797	-1.47059	1.31e-24
adr-1	miR-234	chrII	-	14466181	14466246	814	1176	-1.44928	1.07e-10
adr-1	miR-43	chrII	+	11889846	11889908	581	829	-1.42857	1.21e-07
adr-1;adr-2	miR-795	chrI	+	12594572	12594632	103	148	-1.42857	0.00130488
adr-1	miR-90	chrIII	-	8873908	8873976	84299	120312	-1.42857	1e-100
adr-1	miR-255	chrV	+	5440647	5440705	1043	1455	-1.38889	5.63e-11
adr-1;adr-2	miR-77	chrII	+	12519206	12519265	2653	3650	-1.36986	4.57e-43
adr-1;adr-2	miR-44	chrII	+	11889954	11890019	725	985	-1.35135	3.1e-12
adr-1;adr-2	miR-75	chrX	+	2372470	2372529	290	391	-1.35135	1.33e-05
adr-1	miR-87	chrV	-	12038677	12038742	25523	34641	-1.35135	1e-100
adr-1;adr-2	miR-237	chrX	+	8154042	8154100	3029	3985	-1.31579	6.57e-37
adr-1	miR-786	chrX	+	7882711	7882771	633	832	-1.31579	2.83e-05
adr-1	miR-244	chrI	-	4684338	4684400	3186	4112	-1.2987	1.49e-17
adr-1;adr-2	miR-85	chrII	+	8393506	8393571	2516	3231	-1.28205	2.96e-26
adr-1;adr-2	miR-784	chrX	-	8074876	8074938	106	134	-1.26582	0.0245313
adr-2	miR-259	chrII	+	2452855	2452920	61293	75330	-1.23457	1e-100
adr-1;adr-2	miR-59	chrIV	-	11309140	11309205	6069	7463	-1.23457	4.79e-43
adr-1;adr-2	miR-70	chrV	-	6665535	6665594	27504	34008	-1.23457	1e-100
adr-2	miR-799	chrX	+	2372470	2372529	317	391	-1.23457	0.00201714
adr-1	miR-81	chrX	+	2431091	2431154	912719	1125139	-1.23457	1e-100
adr-1;adr-2	miR-84	chrX	-	16022329	16022389	121147	147501	-1.21951	1e-100
adr-2	miR-59	chrV	-	14366181	14366246	13550	16347	-1.20482	7.49e-67
adr-1	miR-80	chrIII	-	8865192	8865256	315046	379672	-1.20482	1e-100
adr-1	miR-1820	chrIV	+	7767466	7767530	5155	6112	-1.19048	1.43e-12
adr-1	miR-1822	chrII	+	6015512	6015572	352	418	-1.19048	0.0353118
adr-2	miR-358	chrX	-	16022329	16022389	123307	147501	-1.19048	1e-100
adr-1;adr-2	miR-48	chrV	-	14364413	14364472	68414	81661	-1.19048	1e-100
adr-1;adr-2	let-7	chrX	-	14744112	14744176	14994	17704	-1.17647	2.44e-70
adr-2	miR-1830	chrII	+	11889954	11890019	839	985	-1.17647	0.000119062
adr-1	miR-259	chrV	-	10539017	10539078	399	469	-1.17647	0.0357915
adr-1;adr-2	miR-82	chrX	-	2435268	2435328	44450	52526	-1.17647	1e-100
adr-2	miR-252	chrX	+	7882588	7882648	3560	4119	-1.16279	1.46e-12
adr-1	miR-58	chrIV	+	3233266	3233331	9916911	11562827	-1.16279	1e-100
adr-1;adr-2	miR-35	chrII	+	11537545	11537605	45025	51772	-1.14943	1e-100
adr-1;adr-2	miR-71	chrI	-	9379938	9379996	44904	51633	-1.14943	1e-100
adr-1;adr-2	miR-799	chrX	-	8600598	8600659	317	363	-1.14943	0.0172228
adr-2	miR-1822	chrIV	+	10940122	10940184	4875	5516	-1.13636	9.14e-13
adr-2	miR-793	chrIV	+	5562027	5562090	252920	286548	-1.13636	1e-100
adr-2	miR-124	chrI	-	9379938	9379996	46030	51633	-1.1236	2.25e-92
adr-1;adr-2	miR-39	chrII	+	11538019	11538080	9656	10835	-1.1236	1.25e-25
adr-1;adr-2	miR-80	chrIII	-	8865192	8865256	74184	82928	-1.1236	1e-100
adr-1;adr-2	miR-81	chrX	+	2431091	2431154	42280	47269	-1.1236	4.3e-100
adr-1	miR-82	chrX	-	2435268	2435328	416851	466844	-1.1236	1e-100
adr-1;adr-2	miR-124	chrIV	+	11871725	11871788	458	509	-1.11111	0.0189837
adr-1	miR-1821	chrV	-	3042551	3042611	2634	2924	-1.11111	0.00142635
adr-1	miR-233	chrX	-	12078527	12078589	4846	5364	-1.11111	4.24e-05
adr-2	miR-237	chrIII	-	8865192	8865256	74615	82928	-1.11111	1e-100
adr-1;adr-2	miR-65	chrIII	+	2173007	2173068	4962	5529	-1.11111	7.35e-13
adr-1	miR-54	chrX	-	13144932	13144997	66890	73608	-1.0989	1.99e-43
adr-2	miR-76	chrX	+	13857900	13857961	862	944	-1.0989	0.0119187
adr-2	miR-791	chrX	-	14744112	14744176	16061	17704	-1.0989	8.5e-26
adr-1	miR-2	chrI	-	9372774	9372837	7279	7872	-1.08696	0.000116386
adr-2	miR-75	chrIII	+	2173007	2173068	5073	5529	-1.08696	6.19e-08
adr-2	miR-77	chrX	+	2431091	2431154	43419	47269	-1.08696	2.71e-53
adr-1	miR-63	chrX	-	17598698	17598762	31519	34068	-1.07527	1.36e-14
adr-2	miR-64	chrX	-	17598698	17598762	8904	9601	-1.07527	1.57e-10
adr-1	miR-46	chrIII	+	13660409	13660476	3950	4220	-1.06383	0.0116726
adr-1	miR-50	chrI	+	1738651	1738714	18121	19376	-1.06383	3.96e-07
adr-1;adr-2	miR-72	chrII	+	2452855	2452920	70618	75330	-1.06383	3.37e-74
adr-2	miR-85	chrII	+	8393506	8393571	3035	3231	-1.06383	0.000763362
adr-2	miR-234	chrII	+	12519206	12519265	3469	3650	-1.05263	0.00181188
adr-2	miR-47	chrX	+	8154042	8154100	3827	3985	-1.04167	0.0045096
adr-1	miR-240	chrX	+	7882588	7882648	18986	19515	-1.03093	0.0237352
adr-2	miR-243	chrV	-	6665535	6665594	33371	34008	-1.02041	2.57e-07
adr-2	miR-44	chrX	-	2435268	2435328	51577	52526	-1.02041	4.2e-10
adr-2	miR-787	chrV	-	11769915	11769976	4221	4292	-1.02041	0.0472892
adr-2	miR-49	chrIV	-	11309140	11309205	7378	7463	-1.0101	0.0275661
adr-1;adr-2	miR-66	chrIII	+	2173112	2173175	48042	48355	-1.0101	2.8e-09
adr-2	miR-70	chrV	-	14364413	14364472	80835	81661	-1.0101	4.78e-10
adr-1;adr-2	miR-238	chrIII	-	8867250	8867317	29248	28823	1.01	0.0231397
adr-1	miR-57	chrII	-	7850452	7850512	53212	52259	1.02	0.00702205
adr-1;adr-2	miR-58	chrIV	+	3233266	3233331	4571376	4464348	1.02	1.95e-30
adr-2	miR-233	chrIV	+	3233266	3233331	4597965	4464348	1.03	2.7e-30
adr-1	miR-250	chrV	-	11769915	11769976	26046	24992	1.04	9.13e-05
adr-1;adr-2	miR-55	chrX	-	13144763	13144823	68137	64864	1.05	0.000604398
adr-1	miR-49	chrX	+	9989236	9989297	10219	9603	1.06	0.000265609
adr-1;adr-2	miR-63	chrX	-	17598698	17598762	10205	9601	1.06	0.0193055
adr-2	miR-65	chrIII	+	2173112	2173175	51286	48355	1.06	9.49e-09
adr-1	miR-56	chrX	-	13144627	13144691	53896	49732	1.08	9.4e-25
adr-1;adr-2	miR-37	chrII	+	11537770	11537830	7335	6722	1.09	0.000512943
adr-1	miR-41	chrII	+	11538240	11538305	1517	1386	1.09	0.0295365
adr-1	miR-86	chrIII	-	11936535	11936600	19925	18198	1.09	1.74e-12
adr-1	miR-59	chrIV	-	11309140	11309205	48502	44093	1.1	2.23e-30
adr-2	miR-60	chrI	-	6172679	6172739	469431	425207	1.1	1e-100
adr-1;adr-2	miR-64	chrIII	+	2172857	2172924	3824	3483	1.1	0.00445663
adr-1	miR-65	chrIII	+	2173007	2173068	7485	6787	1.1	2.28e-06
adr-2	miR-66	chrIII	+	2172857	2172924	3833	3483	1.1	0.00127338
adr-1;adr-2	miR-57	chrII	-	7850452	7850512	23546	21299	1.11	2.28e-13
adr-1	miR-72	chrII	+	2452855	2452920	359620	319249	1.13	1e-100
adr-2	miR-48	chrII	+	11537545	11537605	59688	51772	1.15	6.3e-83
adr-1	miR-64	chrIII	+	2172857	2172924	8364	7244	1.15	1.32e-12
adr-1	miR-229	chrIII	+	2172447	2172549	19213	16452	1.17	1.83e-30
adr-2	miR-87	chrX	-	8600598	8600659	423	363	1.17	0.0417675
adr-1	miR-237	chrX	+	8154042	8154100	18248	15479	1.18	3.23e-32
adr-1	miR-38	chrII	+	11537865	11537927	3928	3324	1.18	1.73e-08
adr-1;adr-2	miR-230	chrX	+	5803868	5803934	7966	6684	1.19	2.9e-18
adr-2	miR-235	chrII	-	7850452	7850512	25439	21299	1.19	1.09e-58
adr-1;adr-2	miR-54	chrX	-	13144932	13144997	11415	9554	1.19	3.79e-26
adr-1;adr-2	miR-61	chrV	-	11770054	11770110	17366	14637	1.19	1.94e-35
adr-2	miR-82	chrX	+	9989236	9989297	2684	2263	1.19	2.91e-07
adr-2	miR-240	chrIV	+	11871725	11871788	612	509	1.2	0.00497618
adr-1;adr-2	miR-41	chrII	+	11538240	11538305	510	424	1.2	0.0114318
adr-2	miR-63	chrIII	-	8867250	8867317	34539	28823	1.2	4.44e-82
adr-2	miR-83	chrII	-	6328668	6328729	3089	2570	1.2	3.05e-09
adr-2	miR-246	chrX	-	13144763	13144823	78205	64864	1.21	1e-100
adr-2	miR-46	chrIV	+	4450791	4450854	1129	934	1.21	0.000142013
adr-1	miR-84	chrX	-	16022329	16022389	1394840	1151376	1.21	1e-100
adr-1;adr-2	lin-4	chrII	+	5902235	5902294	5226	4280	1.22	2.44e-16
adr-1;adr-2	miR-228	chrIV	+	5562027	5562090	349356	286548	1.22	1e-100
adr-1;adr-2	miR-235	chrI	-	6162308	6162371	2373	1941	1.22	1.89e-08
adr-1	miR-246	chrIV	+	10940122	10940184	54238	44530	1.22	1e-100
adr-2	miR-1820	chrV	-	11770054	11770110	17933	14637	1.23	2.11e-55
adr-2	miR-34	chrX	-	13144627	13144691	43339	35190	1.23	1e-100
adr-2	miR-53	chrX	-	13144932	13144997	11750	9554	1.23	2.05e-38
adr-1;adr-2	miR-51	chrIV	-	11026005	11026066	5742	4642	1.24	3.38e-20
adr-1	miR-66	chrIII	+	2173112	2173175	106341	85745	1.24	1e-100
adr-1	miR-70	chrV	-	6665535	6665594	72372	58187	1.24	1e-100
adr-2	miR-86	chrI	-	6162308	6162371	2412	1941	1.24	3.93e-10
adr-1	miR-55	chrX	-	13144763	13144823	76686	61402	1.25	1e-100
adr-2	miR-43	chrII	-	11446793	11446856	258	205	1.26	0.0182912
adr-1	miR-83	chrIV	+	7841630	7841695	1004	799	1.26	0.000102318
adr-1;adr-2	miR-50	chrI	+	1738651	1738714	16513	13000	1.27	4.5e-70
adr-2	miR-236	chrIII	-	11936535	11936600	3963	3096	1.28	9.2e-20
adr-1;adr-2	miR-241	chrV	-	14366181	14366246	20948	16347	1.28	2.34e-95
adr-1;adr-2	miR-249	chrX	-	3006446	3006512	204	159	1.28	0.0232275
adr-1	miR-47	chrX	+	13921191	13921254	2540	1989	1.28	1.16e-10
adr-2	let-7	chrIII	-	8873908	8873976	50035	38756	1.29	1e-100
adr-1;adr-2	miR-229	chrIII	+	2172447	2172549	1555	1207	1.29	4.71e-09
adr-2	miR-229	chrI	+	1738651	1738714	16823	13000	1.29	1.58e-84
adr-2	miR-244	chrV	-	10539017	10539078	174	135	1.29	0.0310399
adr-1	miR-34	chrX	-	2969767	2969825	987	755	1.31	9.75e-06
adr-2	miR-67	chrIII	+	3142050	3142116	292	223	1.31	0.00396439
adr-1	miR-245	chrI	+	7887384	7887446	347	263	1.32	0.0051307
adr-1	miR-228	chrIV	+	5562027	5562090	6332315	4773874	1.33	1e-100
adr-2	miR-54	chrII	-	14466181	14466246	388	289	1.34	0.000436283
adr-2	miR-58	chrV	-	12038677	12038742	1295	966	1.34	4.63e-10
adr-1	miR-37	chrII	+	11537770	11537830	6009	4463	1.35	6.65e-32
adr-2	miR-51	chrII	-	7030134	7030198	3482	2585	1.35	6.69e-25
adr-2	miR-61	chrX	+	5809321	5809383	235	174	1.35	0.0039932
adr-1;adr-2	miR-79	chrI	+	9332955	9333018	637	471	1.35	4.9e-06
adr-2	miR-81	chrII	-	4371833	4371902	147	109	1.35	0.019082
adr-1	miR-36	chrII	+	11537648	11537710	4622	3405	1.36	3.89e-26
adr-2	miR-57	chrIV	-	11026005	11026066	6323	4642	1.36	7.54e-47
adr-1	miR-61	chrV	-	11770054	11770110	49771	36614	1.36	1e-100
adr-1	miR-67	chrIII	-	5931315	5931379	1352	993	1.36	5.7e-09
adr-1	miR-60	chrII	-	6328668	6328729	6816	4957	1.37	2.1e-40
adr-1;adr-2	miR-49	chrX	+	9989236	9989297	3113	2263	1.38	1.4e-25
adr-2	miR-2	chrX	+	13921191	13921254	360	260	1.39	0.000181036
adr-1	miR-45	chrII	-	11880876	11880941	995	714	1.39	8.43e-08
adr-1	miR-48	chrV	-	14364413	14364472	617952	443363	1.39	1e-100
adr-1;adr-2	miR-86	chrIII	-	11936535	11936600	4312	3096	1.39	2.58e-37
adr-2	miR-239a	chrX	+	11294652	11294711	372	265	1.4	8e-05
adr-1	let-7	chrX	-	14744112	14744176	225361	159864	1.41	1e-100
adr-1	miR-124	chrIV	+	11871725	11871788	652	460	1.42	4.97e-06
adr-1	miR-1	chrI	-	6172679	6172739	1062500	745382	1.43	1e-100
adr-1;adr-2	miR-232	chrIV	-	10994154	10994218	137	96	1.43	0.00899291
adr-1;adr-2	miR-793	chrX	+	13857900	13857961	1350	944	1.43	8.56e-15
adr-2	miR-238	chrX	+	11792384	11792448	5838	4043	1.44	3.21e-60
adr-2	miR-241	chrIV	+	4274255	4274313	68	47	1.44	0.048905
adr-2	miR-40	chrIII	-	5931315	5931379	2675	1857	1.44	2.71e-28
adr-2	miR-62	chrII	+	11538019	11538080	15641	10835	1.44	1e-100
adr-2	miR-35	chrIV	-	11027584	11027646	1603	1108	1.45	4.97e-18
adr-1;adr-2	miR-1	chrI	-	6172679	6172739	620602	425207	1.46	1e-100
adr-1;adr-2	miR-236	chrII	-	7030134	7030198	3782	2585	1.46	5.23e-43
adr-1	miR-39	chrII	+	11538019	11538080	12695	8704	1.46	5.33e-99
adr-2	miR-50	chrII	+	11538115	11538176	5975	4100	1.46	1.72e-64
adr-1;adr-2	miR-76	chrIII	+	3142050	3142116	325	223	1.46	3.98e-05
adr-1;adr-2	miR-252	chrII	-	11446793	11446856	302	205	1.47	5.16e-05
adr-1	miR-77	chrII	+	12519206	12519265	8055	5463	1.47	9.35e-67
adr-1;adr-2	miR-87	chrV	-	12038677	12038742	1430	966	1.48	2.27e-18
adr-1;adr-2	miR-1819	chrX	+	16207884	16207944	338	226	1.49	9.52e-06
adr-1;adr-2	miR-1022	chrX	-	6435393	6435455	940	626	1.5	1.84e-13
adr-1;adr-2	miR-52	chrIV	+	14033992	14034054	74175	49377	1.5	1e-100
adr-1;adr-2	miR-231	chrIII	-	7544996	7545062	8207	5437	1.51	1e-100
adr-1;adr-2	miR-42	chrII	+	11889740	11889807	10051	6673	1.51	1e-100
adr-1;adr-2	miR-788	chrX	-	8485241	8485302	1176	779	1.51	9.03e-17
adr-2	miR-71	chrIII	+	13660409	13660476	1027	675	1.52	4.1e-15
adr-1	miR-795	chrI	+	12594572	12594632	1059	698	1.52	1.73e-11
adr-1	miR-1022	chrX	-	6435393	6435455	1882	1229	1.53	9.66e-20
adr-2	miR-230	chrIII	+	2172447	2172549	1843	1207	1.53	4.71e-26
adr-1;adr-2	miR-47	chrX	+	13921191	13921254	402	260	1.54	2.24e-07
adr-1;adr-2	miR-67	chrIII	-	5931315	5931379	2867	1857	1.54	2.83e-42
adr-2	miR-80	chrIV	+	7841630	7841695	662	428	1.55	5.34e-11
adr-1;adr-2	miR-245	chrI	+	7887384	7887446	205	131	1.56	0.000116778
adr-2	miR-56	chrII	+	11537770	11537830	10454	6722	1.56	1e-100
adr-1	miR-238	chrIII	-	8867250	8867317	60596	38669	1.57	1e-100
adr-1;adr-2	miR-239a	chrX	+	11792384	11792448	6335	4043	1.57	7.96e-97
adr-1;adr-2	miR-1821	chrV	-	3042551	3042611	359	227	1.58	2.42e-07
adr-1;adr-2	miR-234	chrII	-	14466181	14466246	457	289	1.58	6.81e-09
adr-1	miR-242	chrIV	+	4274255	4274313	106	67	1.58	0.0148203
adr-2	miR-38	chrII	+	11537865	11537927	9319	5909	1.58	1e-100
adr-1	miR-793	chrX	+	13857900	13857961	5425	3430	1.58	2.33e-60
adr-2	miR-231	chrII	+	11537648	11537710	13386	8427	1.59	1e-100
adr-1	miR-249	chrX	-	3006446	3006512	518	326	1.59	2.12e-07
adr-1;adr-2	miR-53	chrIV	-	11027584	11027646	1756	1108	1.59	1.34e-29
adr-1	miR-248	chrX	-	2262382	2262442	903	564	1.6	5.26e-12
adr-2	miR-37	chrX	-	12078527	12078589	379	237	1.6	8.77e-08
adr-1	miR-247	chrX	+	4756961	4757022	115	72	1.61	0.00962493
adr-1;adr-2	miR-255	chrV	+	5440647	5440705	161	100	1.61	0.00029984
adr-2	miR-39	chrIII	-	7544996	7545062	8767	5437	1.61	1e-100
adr-2	miR-55	chrX	+	12692527	12692584	3944	2438	1.62	1.14e-67
adr-1	miR-790	chrIV	+	5566414	5566475	2675	1645	1.63	7.49e-34
adr-1;adr-2	miR-90	chrIII	-	8873908	8873976	63391	38756	1.64	1e-100
adr-2	miR-36	chrIV	+	7767466	7767530	753	448	1.68	2.89e-16
adr-2	miR-90	chrI	-	4684338	4684400	1241	738	1.68	8.87e-26
adr-1;adr-2	miR-242	chrIV	+	4274255	4274313	79	47	1.69	0.00463374
adr-2	miR-1	chrI	-	9372774	9372837	2794	1632	1.71	4.89e-59
adr-1;adr-2	miR-244	chrI	-	4684338	4684400	1268	738	1.72	5.22e-29
adr-2	miR-228	chrII	+	6015512	6015572	64	37	1.74	0.00814035
adr-1	miR-51	chrIV	-	11026005	11026066	13563	7792	1.74	1e-100
adr-1	miR-1819	chrX	+	16207884	16207944	3745	2134	1.75	4.22e-59
adr-1	miR-75	chrX	+	2372470	2372529	1923	1086	1.77	4.18e-32
adr-1;adr-2	miR-46	chrIII	+	13660409	13660476	1201	675	1.78	1.04e-30
adr-1;adr-2	miR-233	chrX	-	12078527	12078589	427	237	1.8	1.88e-12
adr-1;adr-2	miR-259	chrV	-	10539017	10539078	243	135	1.8	9.9e-08
adr-1;adr-2	miR-792	chrV	-	3042104	3042165	65	36	1.8	0.00446121
adr-1	miR-1829a	chrX	-	15588233	15588292	144	79	1.83	0.000523223
adr-1	miR-74	chrX	+	2369056	2369118	7348	3980	1.85	1e-100
adr-1	lin-4	chrII	+	5902235	5902294	6639	3477	1.91	1e-100
adr-1	miR-40	chrII	+	11538115	11538176	3372	1765	1.91	5.87e-67
adr-1;adr-2	miR-791	chrX	+	5809321	5809383	333	174	1.91	1.34e-11
adr-1;adr-2	miR-83	chrIV	+	7841630	7841695	817	428	1.91	5.25e-26
adr-2	miR-84	chrII	+	11889740	11889807	12737	6673	1.91	1e-100
adr-1	miR-2210	chrIV	+	10914588	10914648	72	37	1.95	0.00739857
adr-1;adr-2	miR-787	chrX	+	11294652	11294711	517	265	1.95	5.69e-18
adr-1;adr-2	miR-2	chrI	-	9372774	9372837	3215	1632	1.97	1e-100
adr-1;adr-2	miR-60	chrII	-	6328668	6328729	5148	2570	2	1e-100
adr-1	miR-42	chrII	+	11889740	11889807	6306	3109	2.03	1e-100
adr-1	miR-73	chrX	+	2368781	2368842	50661	24403	2.08	1e-100
adr-1;adr-2	miR-62	chrX	+	12692527	12692584	5249	2438	2.15	1e-100
adr-1	miR-797	chrX	+	4757093	4757156	770	353	2.18	8.67e-22
adr-1	miR-235	chrI	-	6162308	6162371	5313	2414	2.2	1e-100
adr-1	miR-35	chrII	+	11537545	11537605	48942	22130	2.21	1e-100
adr-2	miR-72	chrX	-	2969767	2969825	437	197	2.22	1.18e-19
adr-2	miR-42	chrII	+	11889846	11889908	506	226	2.24	7.16e-23
adr-1	miR-44	chrII	+	11889954	11890019	3432	1529	2.24	3.91e-96
adr-1;adr-2	miR-43	chrII	+	11889846	11889908	515	226	2.28	7.54e-25
adr-1	miR-52	chrIV	+	14033992	14034054	157633	68665	2.3	1e-100
adr-1	miR-53	chrIV	-	11027584	11027646	4872	2118	2.3	1e-100
adr-1	miR-2214	chrIII	+	7278641	7278704	305	129	2.36	7.2e-11
adr-1	miR-252	chrII	-	11446793	11446856	586	247	2.37	1.33e-19
adr-1;adr-2	miR-797	chrX	+	4757093	4757156	75	31	2.42	2.45e-05
adr-1;adr-2	miR-34	chrX	-	2969767	2969825	484	197	2.46	8.07e-27
adr-1;adr-2	miR-73	chrX	+	2368781	2368842	4706	1877	2.51	1e-100
adr-1;adr-2	miR-243	chrIV	+	4450791	4450854	2608	934	2.79	1e-100
adr-1	miR-788	chrX	-	8485241	8485302	6474	2292	2.83	1e-100
adr-2	miR-73	chrX	+	2368781	2368842	5656	1877	3.01	1e-100
adr-1;adr-2	miR-358	chrV	-	8580857	8580925	11	3	3.77	0.0289641
adr-1	miR-791	chrX	+	5809321	5809383	2651	695	3.81	1e-100
adr-2	miR-52	chrV	-	8580857	8580925	12	3	3.96	0.0251556
adr-1	miR-243	chrIV	+	4450791	4450854	21858	5512	3.97	1e-100
adr-1	miR-241	chrV	-	14366181	14366246	165096	39316	4.2	1e-100
adr-1	miR-230	chrX	+	5803868	5803934	57871	10792	5.36	1e-100
adr-1;adr-2	miR-1830	chrII	-	4371833	4371902	624	109	5.72	1.92e-84
adr-1	miR-1830	chrII	-	4371833	4371902	16456	2680	6.14	1e-100
adr-1;adr-2	miR-800	chrX	-	380926	380984	207	32	6.47	2.42e-31
adr-1	miR-800	chrX	-	380926	380984	711	60	11.84	1.22e-77

## Sheet: Fold-changes of Analyzed miRNAs
miRNA	adr-1	adr-2	adr-1;adr-2
miR-800	11.84		6.47
miR-1830	6.14		5.72
miR-358			3.77
miR-243	3.97		2.79
miR-73	2.08	3.01	2.51
miR-34	1.31	1.23	2.46
miR-797	2.18		2.42
miR-43	-1.42857	1.26	2.28
miR-62	-1.81818	1.44	2.15
miR-60	1.37		2
miR-2		1.39	1.97
miR-83	1.26	1.2	1.91
miR-791	3.81		1.91
miR-46		1.21	1.78
miR-244	-1.2987	1.29	1.72
miR-242	1.58		1.69
miR-90	-1.42857	1.68	1.64
miR-53	2.3	1.23	1.59
miR-239a	-1.53846	1.4	1.57
miR-245	1.32		1.56
miR-67	1.36	1.31	1.54
miR-47	1.28		1.54
miR-231	-1.72414	1.59	1.51
miR-42	2.03	2.24	1.51
miR-788	2.83		1.51
miR-52	2.3	3.96	1.5
miR-1022	1.53		1.5
miR-1819	1.75		1.49
miR-252	2.37		1.47
miR-1	1.43	1.71	1.46
miR-793	1.58		1.43
miR-86		1.24	1.39
miR-229		1.29	1.29
miR-241	4.2	1.44	1.28
miR-249	1.59		1.28
miR-50		1.46	1.27
miR-51	1.74	1.35	1.24
miR-228	1.33	1.74	1.22
lin-4	1.91		1.22
miR-235	2.2		1.22
miR-799	-1.53846	-1.23457	-1.14943
miR-59		-1.20482	-1.23457
miR-85	-2		-1.28205
miR-253			-2.7027
miR-2214	2.36		-2.77778
miR-35	2.21	1.45
miR-230	5.36	1.53
miR-1828	-2.12766
miR-44	2.24
