# Supplementary material for: Effects of ADARs on small RNA processing pathways in C. elegans
Source: HighWire-hosted journal article supplement (doi:10.1101/gr.134841.111), 2012-06-06
Supplement: S_Table2.xlsx [file S_Table2.xlsx]

## Sheet: adr-1 adr-2 gene expression
Gene Name	Gene Isoform	Alternate Name	Fold Change (adr-1;adr-2 vs WT)	p-value
2RSSE.1	2RSSE.1		1.62	0.016
3R5.1	3R5.1		-1.39	0.043
3R5.2	3R5.2		-1.45	0.043
AC3.11	AC3.11		-1.34	0.05
AC3.8	AC3.8	ugt-2	1.47	0.043
AC7.2	AC7.2a.1	soc-2	-1.53	0.018
AH10.4	AH10.4		1.41	0.05
AH6.13	AH6.13	sra-16	-1.35	0.049
AH6.9	AH6.9	sra-5	-1.36	0.045
B0034.3	B0034.3a	casy-1	-1.38	0.024
B0035.13	B0035.13		1.76	0.015
B0035.3	B0035.3		1.42	0.016
B0035.4	B0035.4.1	pfd-4	1.54	0.044
B0041.7	B0041.7	xnp-1	4.35	8.6e-06
B0047.1	B0047.1a	bath-20	1.63	0.031
B0047.3	B0047.3	bath-24	1.71	0.0035
B0047.4	B0047.4	math-1	1.5	0.029
B0047.5	B0047.5	bath-14	1.72	0.0085
B0198.3	B0198.3		-1.53	0.0085
B0205.1	B0205.1a		-1.57	0.036
B0205.12	B0205.12		1.84	0.041
B0205.14	B0205.14		2.55	0.021
B0207.10	B0207.10		1.84	0.028
B0207.2	B0207.2		-1.36	0.042
B0207.5	B0207.5		-4.63	0.0013
B0213.2	B0213.2	nlp-27	1.6	0.019
B0213.3	B0213.3	nlp-28	2.34	0.0065
B0218.8	B0218.8	clec-52	1.46	0.037
B0228.4	B0228.4b	tag-308	-3.15	0.00027
B0238.10	B0238.10		2.44	5.9e-05
B0238.11	B0238.11		1.37	0.017
B0238.15	B0238.15		-1.64	0.017
B0238.6	B0238.6	srt-70	-1.49	0.021
B0238.7	B0238.7		2.33	0.026
B0244.2	B0244.2	ida-1	-1.64	0.0067
B0250.2	B0250.2		1.34	0.042
B0281.4	B0281.4		1.95	0.0064
B0281.6	B0281.6		1.81	0.047
B0284.1	B0284.1		1.63	0.021
B0284.2	B0284.2		1.44	0.039
B0302.2	B0302.2		-1.37	0.025
B0302.4	B0302.4		-1.42	0.027
B0303.4	B0303.4.2		-1.38	0.046
B0304.5	B0304.5	sra-32	1.5	0.031
B0334.8	B0334.8	age-1	-1.66	0.028
B0336.10	B0336.10.3	rpl-23	1.68	0.015
B0336.3	B0336.3		2.5	0.00044
B0336.4	B0336.4b	rgs-5	-1.39	0.049
B0336.9	B0336.9e	swp-1	-1.53	0.041
B0348.4	B0348.4c	egl-8	1.96	0.0053
B0348.6	B0348.6c	ife-3	2.97	9.5e-05
B0350.2	B0350.2f.1	unc-44	-1.85	0.032
B0361.9	B0361.9		1.4	0.04
B0365.5	B0365.5a	clec-225	2.25	0.032
B0379.3	B0379.3a	mut-16	-1.56	0.031
B0379.6	B0379.6		-1.4	0.028
B0391.4	B0391.4	str-12	-2.44	0.011
B0391.9	B0391.9	fbxa-139	-1.47	0.048
B0393.5	B0393.5		-1.53	0.0072
B0399.1	B0399.1b.1		-1.47	0.05
B0403.6	B0403.6		1.95	0.0024
B0412.2	B0412.2	daf-7	-1.42	0.032
B0412.4	B0412.4.1	rps-29	-1.48	0.035
B0416.2	B0416.2		1.73	0.021
B0416.7	B0416.7a		1.45	0.038
B0454.5	B0454.5		1.51	0.045
B0454.7	B0454.7	clec-2	-1.62	0.04
B0457.3	B0457.3		-1.54	0.039
B0464.2	B0464.2		-1.53	0.038
B0464.6	B0464.6.2		-1.48	0.039
B0491.8	B0491.8a	clh-2	-1.61	0.012
B0495.9	B0495.9		1.33	0.028
B0507.1	B0507.1		-1.42	0.039
B0507.4	B0507.4		1.94	0.0082
B0507.7	B0507.7		1.98	0.002
B0507.8	B0507.8		2.62	0.00029
B0511.10	B0511.10	eif-3.E	6.44	3.8e-08
B0511.11	B0511.11		-1.62	0.015
B0511.14	B0511.14b		-1.64	0.0042
B0511.2	B0511.2		-1.5	0.034
B0511.6	B0511.6.1		1.57	0.045
B0513.3	B0513.3	rpl-29	1.26	0.045
B0524.1	B0524.1		-1.58	0.037
B0546.1	B0546.1.1	mai-2	1.51	0.014
B0546.2	B0546.2.1		-1.43	0.043
B0563.1	B0563.1		-1.48	0.045
B0564.7	B0564.7		-1.38	0.05
BE0003N10.1	BE0003N10.1		-1.56	0.031
BE10.4	BE10.4		1.72	0.033
C01A2.7	C01A2.7.1	nlp-38	-1.36	0.047
C01B10.11	C01B10.11		-1.31	0.04
C01B12.2	C01B12.2		-1.61	0.02
C01B4.10	C01B4.10	str-76	-1.36	0.046
C01B4.9	C01B4.9		1.61	0.019
C01B9.1	C01B9.1b		-1.51	0.031
C01C10.3	C01C10.3	acl-12	1.41	0.049
C01F1.1	C01F1.1		-1.4	0.04
C01G10.4	C01G10.4		1.81	0.031
C01G10.7	C01G10.7		1.72	0.0018
C01G12.12	C01G12.12		-1.46	0.035
C01G6.1	C01G6.1a.1	aqp-2	-1.54	0.018
C01G8.9	C01G8.9a	let-526	1.85	0.028
C01H6.5	C01H6.5a	nhr-23	-1.61	0.032
C01H6.9	C01H6.9		-1.75	0.028
C02B4.2	C02B4.2	nhr-17	-1.74	0.0028
C02C6.1	C02C6.1a	dyn-1	-1.52	0.029
C02C6.2	C02C6.2a	olrn-1	-1.35	0.043
C02C6.3	C02C6.3c		-1.44	0.045
C02F12.1	C02F12.1	tsp-17	-1.44	0.031
C02F4.1	C02F4.1	ced-5	-1.66	0.045
C02F4.1	C02F4.1	ced-5	1.76	0.028
C02F5.14	C02F5.14		-1.36	0.03
C02F5.8	C02F5.8	tsp-1	1.75	0.037
C02H7.1	C02H7.1	dyf-11	-1.72	0.018
C02H7.3	C02H7.3a	aex-3	-1.4	0.047
C03A7.5	C03A7.5	srx-38	2.08	0.0034
C03C10.1	C03C10.1.3	kin-19	-1.54	0.046
C03C10.4	C03C10.4		1.39	0.035
C03E10.3	C03E10.3		-1.69	0.033
C03G5.12	C03G5.12	nspc-5	-1.34	0.048
C03G6.20	C03G6.20	srh-189	-1.87	0.017
C04A11.5	C04A11.5		1.75	0.024
C04C11.1	C04C11.1a		1.38	0.038
C04C11.2	C04C11.2.1		-1.5	0.042
C04C3.3	C04C3.3.2		-1.4	0.037
C04C3.5	C04C3.5c	dyf-3	1.78	0.0024
C04E12.10	C04E12.10		2.23	0.014
C04E12.9	C04E12.9	srbc-2	1.77	0.036
C04E6.8	C04E6.8		-1.56	0.032
C04E6.9	C04E6.9	srd-16	1.95	0.023
C04E7.4	C04E7.4		-1.47	0.035
C04E7.5	C04E7.5		1.52	0.046
C04F12.1	C04F12.1		-1.41	0.049
C04F2.2	C04F2.2	srh-221	1.94	0.044
C04F2.3	C04F2.3	srh-230	1.66	0.043
C04F5.5	C04F5.5	srab-2	-1.45	0.036
C04G2.1	C04G2.1	ttr-39	1.43	0.047
C04G6.3	C04G6.3	pld-1	-1.59	0.018
C04G6.5	C04G6.5		1.97	0.011
C04G6.6	C04G6.6		1.88	0.00045
C04H5.2	C04H5.2	clec-147	1.89	0.0079
C04H5.3	C04H5.3	gcy-29	-1.49	0.04
C04H5.7	C04H5.7b		2.47	0.0043
C04H5.8	C04H5.8	nlp-41	1.69	0.025
C05B5.9	C05B5.9		-2.37	0.036
C05C10.4	C05C10.4.2		1.69	0.024
C05C10.7	C05C10.7		1.77	0.0048
C05C8.7	C05C8.7.3		-1.87	0.0026
C05C9.3	C05C9.3		-1.48	0.0098
C05D11.11	C05D11.11b.1	mel-32	-1.37	0.045
C05D11.4	C05D11.4	let-756	-1.8	0.02
C05D12.7	C05D12.7		1.6	0.041
C05D9.2	C05D9.2.2	lmp-2	1.46	0.032
C05D9.3	C05D9.3		1.87	0.0014
C05E4.1	C05E4.1.2	srp-2	1.41	0.036
C05E4.14	C05E4.14b	srh-2	1.64	0.042
C06A5.1	C06A5.1		5.36	9.7e-06
C06A5.10	C06A5.10		-2.58	0.00016
C06A5.4	C06A5.4		-1.89	0.0049
C06A5.7	C06A5.7a	unc-94	-1.59	0.036
C06A6.2	C06A6.2b		-1.49	0.025
C06B3.10	C06B3.10	str-250	-1.35	0.049
C06B3.13	C06B3.13	srxa-12	2.07	0.043
C06B8.11	C06B8.11		-1.56	0.039
C06B8.2	C06B8.2b		3.01	0.00033
C06B8.7	C06B8.7		-1.46	0.047
C06C3.5	C06C3.5		1.85	0.0058
C06C6.8	C06C6.8		5.45	7.9e-07
C06E1.10	C06E1.10	rha-2	-2.05	0.021
C06E2.9	C06E2.9		-3.37	0.002
C06E4.8	C06E4.8		2.24	0.00072
C06E7.3	C06E7.3a		-1.32	0.048
C06G1.4	C06G1.4.1	ain-1	-1.45	0.046
C06G3.2	C06G3.2	klp-18	-1.35	0.049
C06G4.1	C06G4.1		-1.49	0.042
C06G4.2	C06G4.2c	clp-1	-1.57	0.042
C06G8.4	C06G8.4	srd-7	-1.46	0.048
C06H2.2	C06H2.2		1.67	0.004
C06H2.4	C06H2.4	folt-1	1.41	0.031
C06H5.1	C06H5.1	fbxa-156	1.4	0.041
C06H5.6	C06H5.6		-1.45	0.028
C07A12.1	C07A12.1a	ham-2	-1.41	0.045
C07B5.2	C07B5.2		2.38	0.018
C07B5.5	C07B5.5	nuc-1	1.49	0.024
C07D8.2	C07D8.2		-1.38	0.026
C07E3.9	C07E3.9		1.41	0.037
C07G1.5	C07G1.5.2	hgrs-1	-1.56	0.026
C07G1.7	C07G1.7		11.33	7.9e-06
C07G2.2	C07G2.2b	atf-7	-1.54	0.024
C07H6.5	C07H6.5.1	cgh-1	-1.7	0.026
C08A9.10	C08A9.10		1.95	0.00037
C08A9.3	C08A9.3		-1.9	0.022
C08A9.7	C08A9.7	sdz-2	-1.46	0.05
C08B11.6	C08B11.6.1		1.46	0.042
C08B11.7	C08B11.7	ubh-4	1.41	0.041
C08B11.9	C08B11.9		-1.53	0.042
C08C3.1	C08C3.1a	egl-5	1.69	0.046
C08D8.1	C08D8.1		1.46	0.043
C08E3.10	C08E3.10a	fbxa-158	3.21	0.0063
C08E3.11	C08E3.11	fbxa-159	-1.4	0.043
C08E3.13	C08E3.13		1.79	0.043
C08E3.3	C08E3.3	bath-33	-1.58	0.04
C08E3.4	C08E3.4	fbxa-161	1.8	0.039
C08E3.5	C08E3.5	fbxa-162	1.79	0.035
C08E3.7	C08E3.7	fbxa-164	2.67	0.0021
C08E8.11	C08E8.11		-5.67	0.0031
C08E8.4	C08E8.4		2.38	0.027
C08E8.9	C08E8.9		-1.45	0.029
C08F11.12	C08F11.12		1.69	0.0021
C08F11.18	C08F11.18		-1.51	0.045
C08F11.6	C08F11.6		3.05	6.3e-05
C08F11.7	C08F11.7		2.83	2.8e-05
C08F8.5	C08F8.5	fbxb-9	1.77	0.021
C08G5.7	C08G5.7b		-1.49	0.02
C08G9.1	C08G9.1		1.85	0.0034
C08G9.2	C08G9.2		3.19	0.0097
C08H9.2	C08H9.2		-2.19	0.016
C09D1.1	C09D1.1g	unc-89	-1.55	0.032
C09D4.2	C09D4.2		1.42	0.025
C09D8.1	C09D8.1a	ptp-3	3.23	0.0021
C09E10.2	C09E10.2a	dgk-1	-2.52	0.015
C09E7.10	C09E7.10		1.84	0.017
C09E7.3	C09E7.3	oig-1	1.8	0.031
C09E7.7	C09E7.7.1		-1.7	0.025
C09E7.9	C09E7.9		-1.46	0.039
C09E8.2	C09E8.2b	lips-7	3.45	0.001
C09E8.3	C09E8.3.1	mlt-10	-1.8	0.012
C09F12.1	C09F12.1	clc-1	1.52	0.031
C09F9.2	C09F9.2		1.48	0.038
C09G12.12	C09G12.12	srz-80	-1.5	0.019
C09G12.13	C09G12.13	srz-81	-1.53	0.031
C09G12.5	C09G12.5		-11.41	0.00042
C09G12.6	C09G12.6	srz-70	-1.53	0.042
C09G12.8	C09G12.8b	ced-10	2.07	0.022
C09G4.2	C09G4.2a		-1.42	0.036
C09G9.1	C09G9.1.1		-1.45	0.03
C09G9.5	C09G9.5		1.91	0.0066
C09G9.6	C09G9.6.2	oma-1	-1.45	0.041
C09G9.8	C09G9.8		1.71	0.014
C09H10.10	C09H10.10		-1.47	0.046
C09H5.2	C09H5.2b		1.76	0.013
C09H5.4	C09H5.4	str-143	-1.35	0.024
C09H6.1	C09H6.1a	spr-4	-1.46	0.041
C09H6.2	C09H6.2a	lin-10	-1.44	0.037
C10A4.5	C10A4.5		-1.53	0.023
C10C5.6	C10C5.6b	daf-15	-1.49	0.045
C10C5.7	C10C5.7		1.49	0.042
C10F3.5	C10F3.5a	pcm-1	1.71	0.0036
C10G11.2	C10G11.2	srh-50	5.12	0.00028
C10G11.3	C10G11.3	srh-51	-1.35	0.05
C10G8.4	C10G8.4		1.93	0.0011
C10H11.5	C10H11.5	ugt-27	1.85	0.029
C11G10.1	C11G10.1		1.5	0.029
C11H1.3	C11H1.3		-1.44	0.037
C11H1.7	C11H1.7		1.45	0.029
C12C8.1	C12C8.1	hsp-70	-4.69	7.6e-07
C12D12.3	C12D12.3		2.34	0.0076
C12D8.12	C12D8.12	str-182	2.09	0.031
C12D8.14	C12D8.14	fipr-4	2.35	0.032
C12D8.2	C12D8.2		2	0.02
C13A10.2	C13A10.2		1.54	0.024
C13A2.10	C13A2.10		2.55	0.0044
C13A2.8	C13A2.8		-1.87	0.019
C13A2.9	C13A2.9		-2.03	0.038
C13B4.2	C13B4.2.1	usp-14	-1.39	0.049
C13B7.3	C13B7.3	srd-60	1.83	0.049
C13B7.6	C13B7.6		2.64	0.00014
C13B9.4	C13B9.4a.1		-1.44	0.04
C13D9.5	C13D9.5	srsx-12	-1.33	0.038
C13D9.7	C13D9.7	ncx-8	-1.4	0.043
C13F10.7	C13F10.7.1		1.48	0.028
C13G5.2	C13G5.2		1.46	0.022
C14A6.11	C14A6.11		6.65	1.2e-07
C14A6.2	C14A6.2		1.42	0.037
C14B9.10	C14B9.10.2		1.54	0.024
C14B9.6	C14B9.6b	gei-8	-1.47	0.045
C14C10.6	C14C10.6		1.76	0.0095
C14C11.5	C14C11.5	srx-117	1.62	0.047
C14C6.10	C14C6.10	sri-73	-1.4	0.038
C14C6.11	C14C6.11	sri-72	4.6	4.1e-07
C14C6.12	C14C6.12		1.8	0.0082
C14E2.3	C14E2.3		-1.44	0.04
C14F11.5	C14F11.5a	hsp-43	1.35	0.048
C14F11.7	C14F11.7		-2.42	0.012
C14H10.4	C14H10.4	str-74	2.23	0.033
C15A11.7	C15A11.7a		1.44	0.023
C15A7.4	C15A7.4	lgc-24	1.59	0.027
C15B12.9	C15B12.9		2.07	0.041
C15C7.1	C15C7.1		2.26	0.0012
C15C7.5	C15C7.5		2.86	0.004
C15H11.4	C15H11.4	dhs-22	1.71	0.014
C15H9.4	C15H9.4		2.61	0.0013
C15H9.5	C15H9.5.2		1.56	0.039
C15H9.6	C15H9.6.2	hsp-3	-1.51	0.045
C15H9.9	C15H9.9.3		1.45	0.032
C16A11.5	C16A11.5		-1.38	0.048
C16A11.8	C16A11.8	clec-135	-6.18	0.0044
C16A11.9	C16A11.9		1.45	0.021
C16A3.9	C16A3.9.1	rps-13	1.56	0.032
C16B8.2	C16B8.2		-1.64	0.012
C16C10.11	C16C10.11.1		1.73	0.033
C16C10.4	C16C10.4.2		1.74	0.0056
C16C2.2	C16C2.2a.2	eat-16	-1.56	0.018
C16C2.4	C16C2.4		-1.45	0.045
C16C4.2	C16C4.2	math-12	-1.6	0.031
C16C4.5	C16C4.5	math-15	1.41	0.05
C16C8.10	C16C8.10		-3.88	0.014
C16C8.11	C16C8.11		1.51	0.031
C16C8.19	C16C8.19		-8.17	0.0022
C16C8.2	C16C8.2		-1.63	0.0075
C16C8.7	C16C8.7		-4.88	0.0058
C16C8.8	C16C8.8		-3.05	0.015
C16C8.9	C16C8.9		-10.41	0.0013
C16D6.3	C16D6.3		6.03	4.2e-05
C16E9.4	C16E9.4b	inx-1	5.24	3.1e-06
C16H3.3	C16H3.3b		-1.46	0.037
C17B7.10	C17B7.10		2.43	0.0021
C17B7.4	C17B7.4		2.26	0.0059
C17B7.9	C17B7.9		1.72	0.041
C17C3.6	C17C3.6		-1.29	0.038
C17E4.4	C17E4.4		1.39	0.044
C17E7.12	C17E7.12		1.8	0.012
C17E7.3	C17E7.3	sre-9	1.84	0.016
C17F4.1	C17F4.1	clec-124	-2.32	0.0059
C17F4.11	C17F4.11		2.35	0.024
C17F4.4	C17F4.4	srh-297	-1.35	0.048
C17G1.2	C17G1.2		1.66	0.015
C17G10.1	C17G10.1.1		1.97	0.016
C17H1.10	C17H1.10		1.98	0.015
C17H1.11	C17H1.11		-1.35	0.047
C17H1.12	C17H1.12		-1.34	0.031
C17H1.2	C17H1.2		-1.36	0.043
C17H1.3	C17H1.3		2.6	0.009
C17H1.7	C17H1.7		1.5	0.039
C17H1.9	C17H1.9		2.4	0.041
C17H11.4	C17H11.4		-1.35	0.025
C18A11.1	C18A11.1		1.63	0.025
C18A11.2	C18A11.2		1.78	0.026
C18A3.10	C18A3.10		1.63	0.032
C18A3.5	C18A3.5b		-1.91	0.016
C18B10.6	C18B10.6		-1.6	0.047
C18C4.10	C18C4.10b.3	klc-2	-1.39	0.037
C18C4.2	C18C4.2	cft-1	-1.41	0.046
C18C4.7	C18C4.7		-1.38	0.037
C18D11.6	C18D11.6		1.59	0.024
C18D11.9	C18D11.9		1.59	0.038
C18D4.4	C18D4.4		2.41	0.00027
C18D4.6	C18D4.6a		2.35	9.7e-05
C18D4.8	C18D4.8		1.75	0.0036
C18E9.6	C18E9.6		1.37	0.04
C18H7.3	C18H7.3	col-102	-1.92	0.0092
C18H7.6	C18H7.6		-1.55	0.023
C23F12.1	C23F12.1a	flna-1	-1.6	0.029
C23G10.11	C23G10.11		2.88	0.028
C23G10.3	C23G10.3.1	rps-3	1.77	0.0085
C23G10.4	C23G10.4b	rpn-2	-1.46	0.037
C23H3.7	C23H3.7	tre-5	-1.42	0.047
C23H5.10	C23H5.10		-1.36	0.047
C23H5.12	C23H5.12		-1.36	0.03
C23H5.8	C23H5.8a		1.85	0.012
C24B9.15	C24B9.15	srg-60	1.76	0.045
C24B9.4	C24B9.4a	srt-28	1.92	0.04
C25A1.10	C25A1.10b	dao-5	-1.65	0.028
C25D7.12	C25D7.12		-1.4	0.039
C25D7.13	C25D7.13		-1.57	0.03
C25D7.3	C25D7.3	sdc-3	-1.53	0.038
C25D7.9	C25D7.9		1.5	0.045
C25E10.10	C25E10.10		1.59	0.011
C25E10.13	C25E10.13		1.88	0.018
C25E10.9	C25E10.9b.4	swm-1	1.8	0.0023
C25F6.2	C25F6.2a.2	dlg-1	-1.39	0.034
C25F6.4	C25F6.4	ddr-1	-1.69	0.0095
C25F9.10	C25F9.10		1.78	0.021
C25F9.12	C25F9.12		1.76	0.035
C25F9.15	C25F9.15		2.29	0.049
C25F9.9	C25F9.9		1.77	0.042
C25G4.11	C25G4.11		1.44	0.032
C25G4.2	C25G4.2		1.5	0.018
C25G4.9	C25G4.9		-1.35	0.049
C25H3.12	C25H3.12		1.41	0.02
C25H3.3	C25H3.3		1.66	0.0079
C25H3.6	C25H3.6a		-1.78	0.014
C25H3.7	C25H3.7a		1.47	0.019
C26B2.3	C26B2.3b.2	nhr-31	-1.48	0.03
C26B2.5	C26B2.5		-1.59	0.041
C26B9.6	C26B9.6		1.54	0.03
C26E1.1	C26E1.1		-2	0.028
C26E6.2	C26E6.2		-1.53	0.047
C26E6.3	C26E6.3		1.5	0.032
C26E6.4	C26E6.4	rpb-2	-1.56	0.046
C26E6.9	C26E6.9a	set-2	-1.64	0.018
C26F1.4	C26F1.4.1	rps-30	1.47	0.042
C26G2.2	C26G2.2		-1.48	0.018
C26H9A.2	C26H9A.2		-1.68	0.016
C27A12.2	C27A12.2		-1.44	0.044
C27A12.9	C27A12.9		-1.78	0.032
C27A2.2	C27A2.2a.2	rpl-22	2.14	0.02
C27A7.1	C27A7.1a		-1.45	0.034
C27A7.8	C27A7.8a		2.03	0.0029
C27B7.9	C27B7.9		1.56	0.027
C27C12.2	C27C12.2	egrh-1	-1.57	0.021
C27D6.4	C27D6.4c		-1.31	0.04
C27D6.8	C27D6.8	srb-3	-1.55	0.044
C27F2.8	C27F2.8		-1.54	0.046
C27H2.2	C27H2.2a		-1.38	0.042
C28C12.1	C28C12.1		-1.53	0.037
C28G1.2	C28G1.2		1.88	0.017
C28H8.1	C28H8.1		1.41	0.031
C28H8.12	C28H8.12	dnc-2	1.46	0.032
C28H8.2	C28H8.2		1.43	0.042
C28H8.6	C28H8.6a	pxl-1	-1.49	0.045
C29A12.1	C29A12.1		1.38	0.037
C29E4.12	C29E4.12		1.47	0.048
C29E6.2	C29E6.2	trpa-1	-1.39	0.048
C29F7.1	C29F7.1		1.56	0.016
C29F7.8	C29F7.8		-1.63	0.029
C29F9.13	C29F9.13	nhr-280	1.99	0.047
C29F9.2	C29F9.2		1.88	0.037
C29F9.4	C29F9.4		1.46	0.043
C29F9.5	C29F9.5		2.7	0.0053
C30A5.10	C30A5.10a		-1.35	0.046
C30A5.2	C30A5.2	rfs-1	1.62	0.019
C30A5.6	C30A5.6		-1.5	0.038
C30A5.7	C30A5.7a	unc-86	-1.5	0.032
C30E1.2	C30E1.2		-2	0.0082
C30E1.8	C30E1.8		-1.4	0.012
C30E1.9	C30E1.9b		-1.54	0.021
C30F12.3	C30F12.3		1.48	0.039
C30F12.5	C30F12.5		-1.34	0.049
C30F8.2	C30F8.2.1	vha-16	1.67	0.013
C30G12.3	C30G12.3		-1.56	0.031
C30H6.11	C30H6.11	clec-200	-1.45	0.035
C31A11.3	C31A11.3	srbc-83	-1.34	0.05
C31A11.5	C31A11.5		1.39	0.043
C31A11.7	C31A11.7		1.34	0.029
C31B8.4	C31B8.4		2.03	0.0084
C31E10.1	C31E10.1		-1.32	0.045
C31G12.1	C31G12.1		1.42	0.039
C31H1.8	C31H1.8		-1.6	0.022
C31H5.4	C31H5.4		1.54	0.0076
C31H5.5	C31H5.5		1.53	0.017
C32A9.1	C32A9.1		2.23	0.004
C32D5.11	C32D5.11		1.93	0.031
C32D5.9	C32D5.9.2	lgg-1	1.92	0.00077
C32E12.5	C32E12.5.2	sox-1	-1.67	0.032
C32E8.11	C32E8.11		-1.66	0.044
C32E8.2	C32E8.2a.1	rpl-13	1.74	0.047
C32F10.4	C32F10.4.2		1.53	0.016
C32H11.12	C32H11.12	dod-24	-1.86	0.027
C32H11.7	C32H11.7a		1.5	0.021
C33A11.1	C33A11.1.1		-1.75	0.029
C33A12.1	C33A12.1		1.57	0.048
C33A12.13	C33A12.13	sru-2	1.77	0.02
C33A12.20	C33A12.20		7.98	4.1e-07
C33A12.4	C33A12.4		1.57	0.035
C33C12.3	C33C12.3b		1.86	0.0067
C33C12.6	C33C12.6	srb-14	-1.34	0.036
C33D12.2	C33D12.2		-1.61	0.023
C33E10.4	C33E10.4		-1.39	0.039
C33E10.8	C33E10.8		-1.42	0.047
C33E10.9	C33E10.9		2.18	0.026
C33G3.5	C33G3.5		-7.66	0.0019
C33G8.1	C33G8.1	srw-127	-1.44	0.041
C33G8.3	C33G8.3		1.52	0.045
C33G8.6	C33G8.6	nhr-42	1.41	0.043
C33H5.1	C33H5.1		-1.91	0.026
C33H5.11	C33H5.11.1	imp-3	2.32	0.029
C33H5.13	C33H5.13		1.66	0.019
C33H5.18	C33H5.18a		-1.39	0.03
C33H5.4	C33H5.4a	klp-10	-1.58	0.03
C34B2.10	C34B2.10.2		2.14	0.0065
C34B4.2	C34B4.2a.1		-1.49	0.036
C34B4.5	C34B4.5		1.66	0.031
C34B7.4	C34B7.4		-1.7	0.023
C34C12.9	C34C12.9		4.75	0.00037
C34C6.7	C34C6.7		1.82	0.0039
C34D1.3	C34D1.3	odr-3	2.79	0.0014
C34D1.5	C34D1.5a	zip-5	1.5	0.036
C34D4.13	C34D4.13		1.37	0.042
C34D4.16	C34D4.16	str-50	-1.45	0.035
C34E11.2	C34E11.2		-1.37	0.042
C34E11.4	C34E11.4		1.93	0.0039
C34F6.10	C34F6.10		-1.68	0.013
C34F6.9	C34F6.9		-1.46	0.047
C34G6.1	C34G6.1		-1.62	0.047
C34G6.6	C34G6.6b	noah-1	-1.38	0.03
C34H3.1	C34H3.1	tag-275	-1.36	0.047
C34H4.5	C34H4.5		2.33	0.03
C35A5.6	C35A5.6a		1.46	0.037
C35B1.3	C35B1.3		-3.14	0.012
C35B1.8	C35B1.8		-1.69	0.014
C35C5.4	C35C5.4	mig-2	1.53	0.0073
C35C5.8	C35C5.8a		1.52	0.049
C35C5.9	C35C5.9		1.54	0.019
C35D10.10	C35D10.10		1.43	0.035
C35D6.9	C35D6.9b	srz-38	-1.35	0.039
C35E7.2	C35E7.2b		-1.39	0.031
C35E7.6	C35E7.6		2.74	0.00012
C35E7.7	C35E7.7		-4.18	0.0011
C36B1.1	C36B1.1c	cle-1	-1.43	0.031
C36B1.13	C36B1.13		1.79	0.0085
C36B1.6	C36B1.6b		1.54	0.041
C36B1.8	C36B1.8a		-1.85	0.034
C36B1.9	C36B1.9		2.02	0.0039
C36B7.3	C36B7.3		1.52	0.046
C36B7.7	C36B7.7	hen-1	1.57	0.019
C36C5.12	C36C5.12		1.54	0.014
C36F7.1	C36F7.1	irx-1	-1.72	0.012
C36H8.2	C36H8.2	inx-6	-1.26	0.042
C37A2.5	C37A2.5a	pqn-21	-1.79	0.014
C37A5.11	C37A5.11		1.58	0.028
C37A5.2	C37A5.2	fipr-22	1.82	0.0072
C37A5.4	C37A5.4	fipr-23	1.55	0.027
C37A5.7	C37A5.7.1		1.52	0.045
C37A5.8	C37A5.8	fipr-24	1.76	0.021
C37A5.9	C37A5.9.2	pry-1	-1.39	0.041
C37C3.10	C37C3.10		2.21	0.0084
C37C3.3	C37C3.3	vps-32.2	1.53	0.03
C37C3.6	C37C3.6b.2	ppn-1	-1.47	0.031
C37F5.1	C37F5.1	lin-1	-2.55	0.0091
C37H5.1	C37H5.1	nex-4	-1.55	0.017
C37H5.10	C37H5.10	cwp-1	-3.13	0.0096
C37H5.11	C37H5.11	cwp-2	-1.56	0.037
C37H5.13	C37H5.13c		-1.5	0.039
C37H5.4	C37H5.4	cwp-3	-1.4	0.041
C38C6.2	C38C6.2	atgp-2	-1.65	0.048
C38C6.8	C38C6.8		1.97	0.038
C38D4.5	C38D4.5.2	tag-325	-1.48	0.047
C38D4.9	C38D4.9		1.45	0.031
C38D9.2	C38D9.2		1.73	0.0032
C38D9.6	C38D9.6	fbxa-172	1.89	0.047
C38H2.2	C38H2.2		1.54	0.021
C39B10.3	C39B10.3		1.51	0.04
C39B10.6	C39B10.6	elt-4	1.49	0.048
C39B5.10	C39B5.10		2.29	0.0066
C39B5.7	C39B5.7	fbxa-12	2.25	0.0024
C39E9.5	C39E9.5	scl-7	-5.85	0.0028
C39E9.6	C39E9.6	scl-8	-3.75	0.01
C39F7.4	C39F7.4.2	rab-1	-1.55	0.035
C40A11.5	C40A11.5		-1.37	0.039
C40A11.8	C40A11.8		2.99	0.00018
C40C9.5	C40C9.5a	nlg-1	-1.43	0.043
C40D2.3	C40D2.3	math-21	1.44	0.035
C40H1.1	C40H1.1	cpb-1	-1.59	0.024
C40H1.5	C40H1.5	ttr-5	1.56	0.016
C40H1.6	C40H1.6		1.49	0.03
C40H5.2	C40H5.2		5.49	0.00024
C41A3.1	C41A3.1		-1.77	0.0064
C41C4.1	C41C4.1		1.82	0.0036
C41C4.3	C41C4.3		1.4	0.048
C41C4.6	C41C4.6	ulp-4	1.63	0.016
C41C4.9	C41C4.9		1.75	0.043
C41D11.5	C41D11.5		1.31	0.048
C41D11.9	C41D11.9		1.72	0.0027
C41G7.1	C41G7.1b	smn-1	1.43	0.027
C41G7.8	C41G7.8		1.58	0.042
C41H7.7	C41H7.7	clec-3	-1.84	0.016
C42C1.10	C42C1.10.2		1.36	0.045
C42C1.11	C42C1.11b		-1.53	0.044
C42C1.12	C42C1.12		1.7	0.02
C42C1.4	C42C1.4a.2		-1.43	0.031
C42D4.12	C42D4.12	str-249	-1.49	0.029
C42D8.8	C42D8.8b.1	apl-1	-1.46	0.036
C43D7.6	C43D7.6	srh-208	-1.39	0.032
C43E11.3	C43E11.3a	met-1	-1.63	0.042
C43E11.6	C43E11.6d.2	nab-1	-1.65	0.023
C43F9.8	C43F9.8	efn-2	1.38	0.042
C43G2.2	C43G2.2		3.04	2.8e-05
C43H6.1	C43H6.1		-1.43	0.027
C43H6.3	C43H6.3		1.69	0.014
C43H8.1	C43H8.1		1.59	0.017
C44B11.6	C44B11.6		2	0.0066
C44B12.6	C44B12.6		1.7	0.014
C44B7.1	C44B7.1.2		1.32	0.05
C44B7.12	C44B7.12		2.35	0.00024
C44B7.2	C44B7.2b		-1.37	0.041
C44B9.6	C44B9.6	fbxb-87	1.56	0.039
C44C3.7	C44C3.7	srw-139	-2.34	0.029
C44E12.1	C44E12.1		1.45	0.036
C44E4.2	C44E4.2		-1.55	0.04
C44H4.3	C44H4.3	sym-1	-1.37	0.041
C44H9.4	C44H9.4		-1.4	0.041
C45B11.3	C45B11.3.2	dhs-18	1.53	0.045
C45B11.5	C45B11.5		-1.33	0.047
C45B11.7	C45B11.7		1.47	0.041
C45G3.1	C45G3.1	aspm-1	-1.37	0.041
C45G3.4	C45G3.4		-1.44	0.02
C45G9.6	C45G9.6b		1.41	0.033
C45G9.7	C45G9.7		1.32	0.044
C46C2.3	C46C2.3		1.51	0.032
C46C2.5	C46C2.5		1.68	0.0046
C46F9.1	C46F9.1	math-22	1.63	0.039
C46G7.3	C46G7.3		1.68	0.034
C46G7.4	C46G7.4a	pqn-22	-1.44	0.038
C46G7.5	C46G7.5		-1.51	0.03
C47A10.5	C47A10.5		1.45	0.028
C47B2.1	C47B2.1	fbxa-140	1.39	0.035
C47C12.2	C47C12.2		-1.35	0.048
C47E8.3	C47E8.3		1.58	0.04
C47E8.7	C47E8.7.1	unc-112	-1.45	0.015
C47G2.5	C47G2.5a		1.6	0.021
C48A7.1	C48A7.1a	egl-19	-1.66	0.015
C48A7.2	C48A7.2		-1.57	0.0055
C48B4.12	C48B4.12b		-13.31	0.00083
C48B4.4	C48B4.4b	ced-7	-1.81	0.0072
C48B6.3	C48B6.3.2		1.72	0.016
C48D1.2	C48D1.2	ced-3	2.04	0.0035
C48D1.6	C48D1.6		1.48	0.023
C48D5.1	C48D5.1	nhr-6	-1.48	0.042
C48E7.10	C48E7.10	spp-15	1.51	0.016
C49A1.6	C49A1.6	clec-115	-1.47	0.038
C49A9.10	C49A9.10		1.4	0.042
C49C3.12	C49C3.12	clec-197	-5.05	0.0058
C49D10.10	C49D10.10		-1.53	0.041
C49D10.11	C49D10.11	sdz-7	1.53	0.05
C49D10.4	C49D10.4		-1.98	0.0052
C49D10.6	C49D10.6	nhr-75	2.2	0.037
C49D10.8	C49D10.8		3.68	2.1e-05
C49F5.7	C49F5.7		1.34	0.047
C49G7.2	C49G7.2	srh-169	-1.44	0.024
C49G7.8	C49G7.8	cyp-35A4	-1.6	0.0097
C50A2.2	C50A2.2		-1.49	0.041
C50B6.1	C50B6.1		-1.47	0.026
C50B8.1	C50B8.1		1.46	0.034
C50C10.3	C50C10.3	sru-30	1.6	0.042
C50C10.7	C50C10.7	str-2	2.45	0.0038
C50C10.8	C50C10.8	sru-33	4.74	0.00028
C50C3.12	C50C3.12		-1.4	0.042
C50C3.6	C50C3.6	prp-8	2.43	0.039
C50D2.10	C50D2.10		2.44	0.0021
C50D2.7	C50D2.7.1		1.32	0.049
C50E10.10	C50E10.10	sre-51	2.37	0.032
C50E10.4	C50E10.4	sop-2	-1.6	0.045
C50E3.11	C50E3.11		1.61	0.013
C50F2.6	C50F2.6a.1	fkb-5	1.72	0.045
C50F4.3	C50F4.3	tag-329	-4.84	0.0044
C50F4.4	C50F4.4		1.35	0.042
C50F4.9	C50F4.9		2.2	0.00051
C50H11.11	C50H11.11	srt-16	-1.36	0.044
C50H2.13	C50H2.13		1.37	0.049
C50H2.9	C50H2.9		1.73	0.012
C51E3.10	C51E3.10		1.57	0.021
C51E3.4	C51E3.4	srsx-29	5.44	0.00043
C51E3.5	C51E3.5	srsx-30	1.61	0.044
C52A10.3	C52A10.3		1.94	0.016
C52A11.4	C52A11.4b	mpz-1	-1.42	0.045
C52B11.3	C52B11.3	dop-4	-1.58	0.031
C52B11.4	C52B11.4		2.21	0.046
C52E12.2	C52E12.2a	unc-104	-1.6	0.015
C52E12.4	C52E12.4		-1.51	0.047
C52E2.2	C52E2.2		1.8	0.025
C53A3.2	C53A3.2		-1.55	0.014
C53A5.10	C53A5.10	srt-32	-2.09	0.039
C53A5.11	C53A5.11		2.03	0.013
C53A5.4	C53A5.4	tag-191	-1.35	0.05
C53A5.5	C53A5.5		1.37	0.043
C53A5.9	C53A5.9		2.6	0.0012
C53B4.7	C53B4.7e	bre-1	1.45	0.036
C53C11.2	C53C11.2		1.69	0.027
C53C7.4	C53C7.4		2.26	0.00039
C53C9.2	C53C9.2		-1.3	0.047
C53D6.4	C53D6.4		1.36	0.048
C53H9.1	C53H9.1.1	rpl-27	2.31	0.0056
C53H9.3	C53H9.3		1.74	0.022
C54A12.1	C54A12.1	ptr-6	-1.36	0.045
C54C6.1	C54C6.1.1	rpl-37	1.46	0.023
C54C6.5	C54C6.5		1.56	0.03
C54C6.7	C54C6.7		1.61	0.023
C54C8.11	C54C8.11	gly-15	-1.9	0.028
C54C8.12	C54C8.12		6.06	2.9e-05
C54C8.4	C54C8.4		1.52	0.044
C54C8.7	C54C8.7	clec-11	2.26	0.02
C54C8.8	C54C8.8		3.44	0.00073
C54C8.9	C54C8.9	nlp-39	4.38	0.00018
C54D1.2	C54D1.2	clec-86	2.34	0.017
C54D10.13	C54D10.13		1.8	0.01
C54D10.3	C54D10.3.1		1.61	0.046
C54D10.7	C54D10.7a	dct-3	1.91	0.028
C54D2.5	C54D2.5d	cca-1	-1.65	0.015
C54E10.1	C54E10.1		2.22	0.033
C54F6.15	C54F6.15		2.35	0.034
C54F6.5	C54F6.5		1.93	0.003
C54F6.6	C54F6.6		1.39	0.047
C54G10.2	C54G10.2	rfc-1	-1.69	0.044
C54G4.8	C54G4.8.1	cyc-1	2.53	6.2e-05
C54G6.1	C54G6.1b		1.38	0.042
C54G7.3	C54G7.3a	lgx-1	-1.54	0.032
C54H2.5	C54H2.5.2	sft-4	-1.49	0.034
C55A1.10	C55A1.10	srh-168	-1.64	0.047
C55A1.11	C55A1.11		-1.34	0.049
C55A1.15	C55A1.15		-1.4	0.036
C55A1.16	C55A1.16	srz-49	-1.4	0.048
C55A1.3	C55A1.3	str-248	-1.97	0.048
C55A6.1	C55A6.1		1.44	0.018
C55B6.2	C55B6.2	dnj-7	2.72	0.016
C55C2.1	C55C2.1	scrt-1	-1.63	0.035
C56A3.1	C56A3.1	grl-17	-2.43	0.00098
C56C10.11	C56C10.11		-1.41	0.042
C56C10.3	C56C10.3.1	vps-32.1	1.58	0.0081
C56E6.1	C56E6.1	abcx-1	-1.77	0.015
C56E6.2	C56E6.2		-1.47	0.034
C56E6.3	C56E6.3b		-1.45	0.042
CC4.2	CC4.2	nlp-15	2.09	0.0012
CC4.3	CC4.3.1	smu-1	-1.48	0.038
CC8.1	CC8.1		2.45	0.041
CD4.10	CD4.10		-1.36	0.027
CD4.7	CD4.7b		1.32	0.048
CD4.8	CD4.8		-1.65	0.0034
CE7X_3.1	CE7X_3.1		-1.92	0.0055
cTel54X.1	cTel54X.1	fbxa-6	1.7	0.018
cTel7X.1	cTel7X.1		-1.48	0.045
D1005.4	D1005.4		1.6	0.024
D1005.6	D1005.6		1.72	0.047
D1007.12	D1007.12.1	rpl-24.1	1.73	0.039
D1007.20	D1007.20		2.72	0.029
D1007.7	D1007.7	nrd-1	2.42	0.029
D1014.3	D1014.3.1	snap-1	1.46	0.0092
D1014.4	D1014.4		1.32	0.049
D1022.2	D1022.2		-3.64	0.0069
D1044.2	D1044.2b		-1.53	0.029
D1053.2	D1053.2		1.56	0.01
D1053.4	D1053.4		1.48	0.049
D1054.10	D1054.10		1.54	0.042
D1054.16	D1054.16	srh-163	-1.59	0.049
D1054.2	D1054.2.1	pas-2	1.54	0.0097
D1054.3	D1054.3		2.08	0.011
D1054.7	D1054.7	clec-220	-2.91	0.0066
D1065.2	D1065.2		-1.99	0.037
D1065.5	D1065.5	srh-211	-1.55	0.021
D1073.1	D1073.1a	trk-1	-1.54	0.048
D1081.6	D1081.6		-1.42	0.037
D1086.1	D1086.1		1.39	0.031
D1086.11	D1086.11		1.41	0.036
D1086.2	D1086.2		1.47	0.016
D1086.4	D1086.4		1.48	0.023
D1086.7	D1086.7		1.4	0.036
D2005.5	D2005.5	drh-3	-1.44	0.037
D2005.6	D2005.6		3	0.00037
D2007.1	D2007.1		1.42	0.032
D2007.4	D2007.4		1.48	0.028
D2013.1	D2013.1	rab-39	1.45	0.031
D2013.5	D2013.5	eat-3	-1.92	0.042
D2013.9	D2013.9.1	ttll-12	-1.33	0.042
D2021.4	D2021.4a		1.44	0.04
D2021.8	D2021.8		-1.44	0.045
D2024.10	D2024.10		1.42	0.034
D2030.2	D2030.2b.2		1.42	0.036
D2030.5	D2030.5	mce-1	1.7	0.0043
D2045.9	D2045.9		-1.79	0.041
D2062.4	D2062.4a		-1.39	0.043
D2085.1	D2085.1	pyr-1	-1.6	0.02
D2085.2	D2085.2	atg-10	1.38	0.037
D2096.1	D2096.1		-1.39	0.038
DY3.1	DY3.1	tin-13	1.72	0.041
DY3.5	DY3.5	pqn-26	-1.51	0.025
DY3.8	DY3.8		1.53	0.0096
E_BE45912.2	E_BE45912.2		-1.35	0.048
E02C12.13	E02C12.13	ttr-49	1.75	0.014
E02C12.5	E02C12.5	gpa-3	-1.43	0.039
E02C12.8	E02C12.8b		1.83	0.028
E02H1.5	E02H1.5.2		1.34	0.045
E02H4.5	E02H4.5		-1.62	0.033
E02H9.5	E02H9.5		1.46	0.04
E02H9.7	E02H9.7		1.41	0.029
E02H9.9	E02H9.9		-4.2	3e-05
E03A3.2	E03A3.2	rcq-5	-1.44	0.046
E03A3.6	E03A3.6	unc-79	-1.43	0.045
E03D2.3	E03D2.3	srh-204	-1.75	0.041
E03H12.4	E03H12.4		-1.36	0.047
E04D5.2	E04D5.2		1.36	0.045
E04F6.10	E04F6.10		1.4	0.043
E04F6.16	E04F6.16	mrpr-1	2.74	0.032
E04F6.7	E04F6.7	dhs-7	1.43	0.043
E04F6.8	E04F6.8.2		2.42	0.00094
E04F6.9	E04F6.9		2.46	0.003
EEED8.10	EEED8.10a		-1.4	0.042
EEED8.11	EEED8.11	clec-141	-3.87	0.0054
EEED8.13	EEED8.13		1.33	0.046
EEED8.3	EEED8.3		1.53	0.032
EEED8.8	EEED8.8	ndx-6	1.51	0.017
F01D4.10	F01D4.10		-1.68	0.048
F01D4.6	F01D4.6a	mec-3	1.42	0.035
F01D4.7	F01D4.7	srb-17	1.31	0.04
F01D5.2	F01D5.2		-1.52	0.041
F01F1.13	F01F1.13		1.63	0.0081
F01F1.2	F01F1.2.1		1.37	0.049
F01F1.3	F01F1.3		1.81	0.006
F01G10.11	F01G10.11		1.76	0.035
F01G10.3	F01G10.3	ech-9	1.88	0.0078
F01G4.2	F01G4.2.1	ard-1	1.35	0.042
F01G4.3	F01G4.3		-1.62	0.015
F02C9.3	F02C9.3	tat-6	-1.33	0.031
F02D10.3	F02D10.3		-1.39	0.032
F02E11.2	F02E11.2		1.5	0.039
F02E11.5	F02E11.5	scl-15	-5.12	0.0043
F02E8.3	F02E8.3	aps-2	1.43	0.036
F02E8.4	F02E8.4		-1.51	0.041
F02E9.2	F02E9.2a	lin-28	1.76	0.0055
F02H6.2	F02H6.2		-1.79	0.048
F02H6.3	F02H6.3a		-1.58	0.039
F07A11.6	F07A11.6d.1	din-1	-1.55	0.027
F07A5.7	F07A5.7.1	unc-15	-1.49	0.033
F07B7.14	F07B7.14		1.67	0.041
F07B7.2	F07B7.2		7.62	2.5e-07
F07C4.1	F07C4.1	str-47	1.9	0.004
F07C6.1	F07C6.1	pin-2	1.5	0.044
F07D10.1	F07D10.1.1	rpl-11.2	1.95	0.045
F07E5.9	F07E5.9		2.44	0.011
F07F6.7	F07F6.7		1.53	0.05
F07F6.8	F07F6.8.2		1.31	0.048
F07G6.8	F07G6.8		-2.26	0.009
F07H5.3	F07H5.3b		2.03	0.03
F07H5.7	F07H5.7		1.81	0.011
F08A7.1	F08A7.1		1.82	0.0058
F08A8.2	F08A8.2		-1.52	0.028
F08B12.5	F08B12.5		-1.43	0.045
F08B4.1	F08B4.1a	dic-1	-1.68	0.011
F08B4.2	F08B4.2a	cdh-5	-1.55	0.0092
F08E10.2	F08E10.2	srbc-61	-1.65	0.048
F08E10.4	F08E10.4	srh-110	-1.33	0.03
F08E10.5	F08E10.5	srh-253	-1.35	0.038
F08F1.4	F08F1.4a		1.94	0.00043
F08F8.7	F08F8.7.3		1.51	0.026
F08F8.8	F08F8.8	gosr-1	1.4	0.03
F08G12.11	F08G12.11		1.49	0.049
F08G2.11	F08G2.11		2.72	0.02
F08G2.5	F08G2.5		3.82	2e-05
F08G5.5	F08G5.5.2	ugt-65	-1.4	0.05
F08H9.5	F08H9.5	clec-227	1.68	0.028
F09A5.2	F09A5.2		-1.52	0.025
F09A5.9	F09A5.9	ttr-34	1.61	0.031
F09B9.2	F09B9.2a	unc-115	-1.47	0.05
F09C12.6	F09C12.6		1.76	0.0052
F09C6.10	F09C6.10		-5.34	0.0013
F09C6.11	F09C6.11		2.04	0.017
F09C6.12	F09C6.12		1.87	0.043
F09C6.13	F09C6.13		2.16	0.0084
F09C6.14	F09C6.14		7.43	4.8e-06
F09C6.3	F09C6.3		-1.36	0.039
F09C6.7	F09C6.7	srd-68	6.85	3.1e-06
F09C6.8	F09C6.8	nhr-262	-1.32	0.049
F09C8.2	F09C8.2.2		-1.43	0.019
F09E10.1	F09E10.1		1.45	0.03
F09E10.10	F09E10.10		2.41	0.018
F09E10.11	F09E10.11	tts-1	3.46	0.00011
F09E10.3	F09E10.3	dhs-25	1.86	0.015
F09E5.1	F09E5.1.2	pkc-3	-1.44	0.048
F09E5.11	F09E5.11		1.63	0.017
F09E5.14	F09E5.14		1.72	0.037
F09E8.5	F09E8.5	scl-14	1.65	0.042
F09F3.11	F09F3.11	srx-135	1.87	0.038
F09F3.6	F09F3.6	ttr-21	2.08	0.049
F09F3.7	F09F3.7	srx-134	-1.36	0.047
F09F3.8	F09F3.8		2.01	0.01
F09F7.1	F09F7.1		1.35	0.031
F09F7.3	F09F7.3.1		-1.38	0.04
F09F7.4	F09F7.4a.1		-1.46	0.025
F09F7.6	F09F7.6		1.53	0.047
F09F7.7	F09F7.7a		1.52	0.025
F09F9.3	F09F9.3		2.19	0.00089
F09G2.1	F09G2.1		-1.51	0.018
F09G8.5	F09G8.5		-1.42	0.039
F10A3.3	F10A3.3	fbxa-18	2.06	0.021
F10B5.1	F10B5.1.1	rpl-10	1.99	0.0091
F10C1.2	F10C1.2a.1	ifb-1	-1.58	0.022
F10C1.9	F10C1.9		1.43	0.04
F10C2.6	F10C2.6	drs-2	-1.74	0.045
F10D11.1	F10D11.1.1	sod-2	1.57	0.038
F10D2.4	F10D2.4	str-112	1.55	0.048
F10D2.8	F10D2.8		1.73	0.048
F10D7.4	F10D7.4		3.2	0.014
F10D7.5	F10D7.5b		-1.98	0.028
F10E7.8	F10E7.8		-1.42	0.035
F10F2.1	F10F2.1	sel-2	-1.48	0.033
F10G2.9	F10G2.9	nhr-263	1.72	0.049
F10G7.2	F10G7.2.1	tsn-1	-1.53	0.013
F11A1.3	F11A1.3b	daf-12	4.07	0.00035
F11A10.2	F11A10.2		1.36	0.048
F11A5.2	F11A5.2	srh-279	1.72	0.036
F11A6.2	F11A6.2	scrm-4	3.78	0.00013
F11C1.5	F11C1.5a.2		-1.35	0.031
F11C1.6	F11C1.6a.1	nhr-25	-1.37	0.041
F11C7.5	F11C7.5	osm-11	1.93	0.0088
F11C7.6	F11C7.6a		2.75	7.2e-05
F11D11.15	F11D11.15		-2.55	0.0072
F11D11.16	F11D11.16		-1.36	0.035
F11D11.6	F11D11.6		-1.33	0.048
F11E6.11	F11E6.11.1		1.57	0.033
F11E6.3	F11E6.3.1		-1.71	0.019
F11G11.13	F11G11.13		-1.36	0.034
F12A10.6	F12A10.6		11.53	2.6e-08
F12A10.9	F12A10.9		1.81	0.015
F12B6.2	F12B6.2c		1.29	0.05
F12E12.6	F12E12.6		1.56	0.035
F12E12.8	F12E12.8	fbxb-91	-1.43	0.042
F13A2.4	F13A2.4		1.75	0.023
F13B10.1	F13B10.1b	tir-1	-1.5	0.027
F13B9.8	F13B9.8a	fis-2	1.54	0.047
F13C5.2	F13C5.2		-1.44	0.05
F13C5.3	F13C5.3b		-1.41	0.021
F13C5.6	F13C5.6a	unc-96	-1.37	0.048
F13D11.2	F13D11.2a	hbl-1	-1.46	0.035
F13D12.4	F13D12.4a.3	alh-8	-1.55	0.03
F13D12.7	F13D12.7.1	gpb-1	1.71	0.0049
F13D2.4	F13D2.4		-1.38	0.037
F13E6.4	F13E6.4		-1.52	0.045
F13E9.10	F13E9.10		-4.03	0.037
F13E9.12	F13E9.12.1		1.76	0.029
F13E9.2	F13E9.2	fipr-14	2.28	0.033
F13G3.11	F13G3.11		2.02	0.0046
F13H10.1	F13H10.1		1.8	0.039
F13H10.6	F13H10.6		1.8	0.018
F13H10.8	F13H10.8		1.66	0.011
F13H8.10	F13H8.10b	bpl-1	-1.49	0.042
F13H8.2	F13H8.2		-1.66	0.047
F13H8.5	F13H8.5		1.99	0.012
F13H8.7	F13H8.7.1		1.83	0.027
F13H8.8	F13H8.8		-1.61	0.02
F14B8.2	F14B8.2		1.94	0.0077
F14D2.11	F14D2.11		1.5	0.019
F14D2.12	F14D2.12	bath-30	1.42	0.049
F14D2.2	F14D2.2		1.35	0.038
F14D7.6	F14D7.6		1.57	0.021
F14E5.2	F14E5.2b		-1.38	0.045
F14F3.1	F14F3.1a	vab-3	-1.55	0.023
F14F7.3	F14F7.3	cyp-13A12	1.47	0.024
F14F8.13	F14F8.13	srz-102	1.8	0.032
F14F8.14	F14F8.14		-1.66	0.015
F14F8.7	F14F8.7	srw-36	-1.35	0.048
F14F9.2	F14F9.2		1.74	0.049
F14F9.6	F14F9.6		2.31	0.043
F14H3.4	F14H3.4		1.41	0.041
F15A2.7	F15A2.7		1.83	0.023
F15A4.6	F15A4.6		1.8	0.035
F15A4.7	F15A4.7	srg-17	1.79	0.036
F15B10.2	F15B10.2	drh-1	-1.44	0.044
F15B10.3	F15B10.3		1.45	0.023
F15C11.1	F15C11.1.1	sem-4	-1.43	0.04
F15D3.8	F15D3.8		-2.04	0.0011
F15D4.3	F15D4.3		2.16	0.0083
F15D4.5	F15D4.5		1.4	0.041
F15D4.6	F15D4.6		1.91	0.011
F15E11.2	F15E11.2		1.6	0.047
F15E6.10	F15E6.10		2.37	0.015
F15E6.3	F15E6.3		1.53	0.048
F15E6.4	F15E6.4		2.89	0.00028
F15E6.7	F15E6.7	srv-4	2.64	0.004
F15E6.8	F15E6.8	dct-7	1.93	0.009
F15G9.1	F15G9.1a		1.57	0.045
F15G9.2	F15G9.2		-1.39	0.044
F15G9.4	F15G9.4b	him-4	-1.55	0.016
F15G9.6	F15G9.6		1.77	0.031
F15H10.10	F15H10.10		-1.35	0.044
F16A11.3	F16A11.3c	ppfr-1	-1.54	0.019
F16B3.2	F16B3.2		1.87	0.03
F16B4.2	F16B4.2b		1.55	0.029
F16B4.4	F16B4.4.1		1.65	0.037
F16C3.2	F16C3.2		1.48	0.027
F16G10.10	F16G10.10		-2.03	0.026
F17A2.10	F17A2.10	srd-46	-1.48	0.024
F17A2.6	F17A2.6	srd-41	1.94	0.049
F17A9.5	F17A9.5		-1.83	0.002
F17B5.3	F17B5.3	clec-109	-3.73	0.022
F17B5.7	F17B5.7		-1.44	0.046
F17C11.1	F17C11.1		1.93	0.00054
F17C11.13	F17C11.13		1.72	0.017
F17C11.16	F17C11.16		2.21	0.045
F17C11.5	F17C11.5	clec-221	-2.58	0.016
F17C11.6	F17C11.6		1.8	0.018
F17C8.1	F17C8.1	acy-1	-1.5	0.026
F17E9.1	F17E9.1	col-116	1.84	0.0032
F17E9.11	F17E9.11	lys-10	2.15	0.0022
F17E9.12	F17E9.12	his-31	1.32	0.043
F17E9.2	F17E9.2		2.09	0.0019
F17E9.4	F17E9.4		1.96	0.0043
F18A1.3	F18A1.3a.2	lir-1	1.42	0.029
F18A11.7	F18A11.7		1.49	0.047
F18C12.1	F18C12.1	che-3	-1.55	0.019
F18C12.2	F18C12.2b	rme-8	-1.64	0.025
F18C5.3	F18C5.3	tag-184	-1.49	0.029
F18E2.2	F18E2.2	abcf-1	-1.58	0.032
F18E3.3	F18E3.3	srh-126	4.11	0.00063
F18E9.5	F18E9.5a.1	tag-279	-1.51	0.038
F18E9.8	F18E9.8		-1.54	0.049
F18F11.3	F18F11.3	cdh-8	1.82	0.043
F18G5.6	F18G5.6		1.37	0.041
F18H3.3	F18H3.3a.1	pab-2	-1.41	0.048
F18H3.5	F18H3.5b	cdk-4	1.44	0.039
F19B10.4	F19B10.4		1.94	0.0024
F19B2.1	F19B2.1	srz-33	-1.69	0.047
F19B2.3	F19B2.3	srw-39	6.64	5.7e-07
F19B6.1	F19B6.1a		2.31	0.011
F19C6.1	F19C6.1	grk-1	-1.53	0.032
F19C7.8	F19C7.8b		-1.48	0.014
F19F10.4	F19F10.4	ttr-10	1.72	0.028
F19H6.5	F19H6.5		-1.81	0.021
F20A1.7	F20A1.7c	twk-11	-2.21	0.018
F20B4.4	F20B4.4		-1.68	0.023
F20B6.3	F20B6.3	mrp-6	-1.44	0.035
F20C5.1	F20C5.1a	pme-3	-1.42	0.049
F20C5.3	F20C5.3		2.38	0.00043
F20D12.1	F20D12.1b	csr-1	1.45	0.03
F20D6.2	F20D6.2		-1.83	0.025
F20E11.17	F20E11.17		1.87	0.031
F20E11.8	F20E11.8	srh-157	-1.69	0.034
F20G2.4	F20G2.4	nas-24	-5.2	0.007
F20H11.2	F20H11.2	nsh-1	1.89	0.016
F20H11.3	F20H11.3.1	mdh-1	-1.37	0.04
F21A3.8	F21A3.8		-1.98	0.039
F21C10.11	F21C10.11a		2.52	0.0066
F21C10.9	F21C10.9.1		1.58	0.034
F21C3.5	F21C3.5	pfd-6	1.65	0.0052
F21D12.2	F21D12.2		-1.35	0.047
F21D5.1	F21D5.1.1		5.03	3.1e-05
F21D5.8	F21D5.8		1.63	0.041
F21D9.4	F21D9.4		1.51	0.023
F21F8.1	F21F8.1	srg-33	-1.41	0.027
F21F8.2	F21F8.2		2.16	0.017
F21H11.2	F21H11.2b	sax-2	-3.28	8.9e-05
F21H11.3	F21H11.3.1	tbx-2	-1.56	0.028
F21H7.3	F21H7.3		1.47	0.045
F22A3.1	F22A3.1a	ets-4	2.94	0.018
F22A3.7	F22A3.7	ttr-36	1.43	0.048
F22B3.5	F22B3.5		1.87	0.032
F22B5.2	F22B5.2	eif-3.G	2.33	0.022
F22B7.10	F22B7.10	dpy-19	-1.42	0.042
F22B7.2	F22B7.2	flp-23	-2.21	0.019
F22B7.3	F22B7.3		2.41	0.014
F22B7.7	F22B7.7	twk-7	2.68	0.0014
F22B7.9	F22B7.9		2.01	0.042
F22B8.4	F22B8.4		3.14	0.0013
F22D6.8	F22D6.8		1.42	0.021
F22E10.2	F22E10.2	pgp-13	-1.51	0.02
F22E10.4	F22E10.4	pgp-15	-1.4	0.049
F22E12.4	F22E12.4a.2	egl-9	-1.86	0.0093
F22F4.4	F22F4.4		1.57	0.043
F22F7.2	F22F7.2		3.59	0.00033
F22G12.1	F22G12.1		1.93	0.011
F22G12.5	F22G12.5		-1.59	0.047
F22H10.2	F22H10.2		1.59	0.0083
F23B2.12	F23B2.12	pcp-2	-1.44	0.033
F23B2.13	F23B2.13	rpb-12	1.56	0.036
F23B2.5	F23B2.5b	flp-1	1.75	0.035
F23B2.9	F23B2.9		-1.39	0.035
F23C8.12	F23C8.12		-1.86	0.0085
F23D12.1	F23D12.1		1.37	0.047
F23D12.2	F23D12.2		-1.72	0.02
F23D12.9	F23D12.9		1.58	0.026
F23F12.12	F23F12.12.2		1.57	0.023
F23F12.4	F23F12.4	sdz-15	-1.58	0.044
F23H11.5	F23H11.5.1		1.88	0.02
F23H11.6	F23H11.6		-1.81	0.0038
F23H12.1	F23H12.1	snb-2	1.58	0.019
F23H12.2	F23H12.2.2		1.63	0.039
F25B3.3	F25B3.3	rgef-1	2.16	0.036
F25B4.4	F25B4.4		1.42	0.031
F25B4.7	F25B4.7		1.56	0.013
F25C8.2	F25C8.2	amx-3	1.37	0.049
F25C8.3	F25C8.3a	unc-80	-1.4	0.05
F25C8.5	F25C8.5	ttll-9	-1.67	0.02
F25E2.2	F25E2.2		-1.46	0.046
F25E2.5	F25E2.5a	daf-3	-1.83	0.0085
F25E5.1	F25E5.1		-1.66	0.048
F25E5.10	F25E5.10	try-8	-12.32	0.0002
F25E5.7	F25E5.7		-2.58	0.014
F25G6.1	F25G6.1		-1.66	0.03
F25G6.2	F25G6.2		-1.72	0.023
F25G6.3	F25G6.3a.1	acr-16	-1.37	0.04
F25H2.13	F25H2.13	bch-1	-1.56	0.026
F25H2.14	F25H2.14		1.69	0.02
F25H2.15	F25H2.15		4.23	0.00055
F25H5.4	F25H5.4.4	eft-2	-1.42	0.036
F25H5.8	F25H5.8		2	0.021
F25H8.1	F25H8.1b		-1.49	0.039
F26A1.12	F26A1.12	clec-157	-2.17	0.036
F26A1.14	F26A1.14		-1.51	0.034
F26A1.15	F26A1.15	acbp-7	-1.52	0.02
F26A10.2	F26A10.2		1.8	0.024
F26C11.4	F26C11.4		-4.08	0.0083
F26D10.12	F26D10.12	clec-196	1.51	0.035
F26D10.13	F26D10.13		-10.61	0.0023
F26D11.11	F26D11.11a	let-413	-1.35	0.026
F26D11.12	F26D11.12		1.92	0.022
F26D11.13	F26D11.13		2.52	0.027
F26D11.9	F26D11.9	clec-217	-6.91	0.0073
F26D2.16	F26D2.16		-17.02	0.00035
F26D2.17	F26D2.17		-1.42	0.041
F26E4.2	F26E4.2		2.45	0.0069
F26F12.5	F26F12.5b		1.65	0.011
F26F12.7	F26F12.7.2	let-418	-1.65	0.03
F26F12.8	F26F12.8		1.95	0.022
F26F2.2	F26F2.2		2.5	0.03
F26F2.3	F26F2.3		1.92	0.006
F26F2.4	F26F2.4		5.35	0.0055
F26F2.6	F26F2.6	clec-263	-7.29	0.0096
F26F2.9	F26F2.9		2.6	0.026
F26F4.11	F26F4.11	rpb-8	1.68	0.0097
F26F4.13	F26F4.13	kbp-2	1.37	0.034
F26G5.9	F26G5.9	tam-1	-1.71	0.049
F26H11.2	F26H11.2c	nurf-1	-1.52	0.022
F26H9.2	F26H9.2		-1.7	0.027
F27C1.4	F27C1.4		1.43	0.03
F27D4.6	F27D4.6a.3		-1.35	0.037
F27D9.2	F27D9.2		1.56	0.027
F27E11.3	F27E11.3a	cfz-2	3.8	0.0013
F27E5.8	F27E5.8		2.06	0.01
F28B1.1	F28B1.1		-5.34	0.019
F28B1.12	F28B1.12		5.76	1.2e-07
F28B1.2	F28B1.2		-4.57	0.013
F28B1.3	F28B1.3		-1.62	0.047
F28B1.9	F28B1.9		-4.76	0.014
F28B12.2	F28B12.2e.3	egl-44	-1.55	0.01
F28B3.4	F28B3.4		-1.49	0.014
F28C6.10	F28C6.10		-1.5	0.049
F28C6.7	F28C6.7c	rpl-26	1.56	0.032
F28D1.11	F28D1.11		2.93	0.0031
F28D1.7	F28D1.7.3	rps-23	1.78	0.026
F28E10.1	F28E10.1d		-1.67	0.022
F28F5.3	F28F5.3c	lim-8	-1.49	0.023
F28F8.7	F28F8.7		-1.91	0.005
F28F9.3	F28F9.3		1.77	0.046
F28G4.1	F28G4.1	cyp-37B1	1.9	0.028
F28G4.5	F28G4.5		5.88	0.00013
F28H1.2	F28H1.2.2	cpn-3	-1.43	0.026
F28H1.4	F28H1.4a		1.67	0.036
F28H6.6	F28H6.6		-1.63	0.023
F28H6.8	F28H6.8		1.88	0.0063
F28H7.2	F28H7.2		1.48	0.048
F28H7.3	F28H7.3		1.7	0.036
F28H7.8	F28H7.8		-1.45	0.015
F28H7.9	F28H7.9	sre-6	2.57	0.00018
F29A7.3	F29A7.3		-1.71	0.014
F29B9.2	F29B9.2a		-1.48	0.029
F29C12.5	F29C12.5	bath-45	2.19	0.00045
F29C12.6	F29C12.6		2.93	0.024
F29D11.1	F29D11.1	lrp-1	-1.59	0.027
F29F11.5	F29F11.5a	ceh-22	-1.41	0.039
F29F11.6	F29F11.6	gsp-1	-1.49	0.02
F30A10.13	F30A10.13b.1		2.06	0.0076
F30A10.14	F30A10.14		1.84	0.0039
F30F8.10	F30F8.10a		1.34	0.048
F30H5.3	F30H5.3		-1.66	0.013
F30H5.5	F30H5.5		-1.49	0.039
F31A3.2	F31A3.2	hlh-28	-1.75	0.039
F31C3.7	F31C3.7	rrn-1.1	1.38	0.04
F31D4.2	F31D4.2		1.76	0.0076
F31D4.4	F31D4.4	clec-264	1.32	0.048
F31D4.9	F31D4.9		1.58	0.045
F31D5.5	F31D5.5		-1.41	0.044
F31E8.2	F31E8.2b	snt-1	1.36	0.041
F31E9.6	F31E9.6		2.18	0.00012
F31F4.1	F31F4.1		-1.66	0.041
F31F4.14	F31F4.14	sru-25	-1.58	0.0025
F31F4.3	F31F4.3	srx-22	-1.34	0.048
F31F4.9	F31F4.9	srh-245	-1.34	0.046
F31F7.1	F31F7.1b.1		-1.65	0.026
F32A5.2	F32A5.2a		-1.53	0.034
F32A5.5	F32A5.5b.1	aqp-1	1.6	0.034
F32A5.7	F32A5.7	lsm-4	1.41	0.036
F32A6.2	F32A6.2	ift-81	-1.71	0.011
F32A6.3	F32A6.3a	vps-41	-1.39	0.043
F32A7.1	F32A7.1	srw-92	-1.61	0.042
F32A7.5	F32A7.5a		-1.69	0.0021
F32B4.8	F32B4.8		-1.79	0.0089
F32B6.2	F32B6.2.1		-1.64	0.036
F32G8.1	F32G8.1	srd-34	-1.45	0.025
F32G8.3	F32G8.3		1.84	0.044
F32G8.6	F32G8.6	cat-4	1.47	0.035
F32H2.2	F32H2.2	mdt-31	1.46	0.032
F32H5.3	F32H5.3b		1.45	0.038
F32H5.6	F32H5.6b	srx-125	1.84	0.0052
F33D11.12	F33D11.12		1.35	0.049
F33D11.3	F33D11.3	col-54	1.86	0.038
F33D11.8	F33D11.8		1.49	0.041
F33D4.2	F33D4.2a.2	itr-1	-1.94	0.033
F33D4.7	F33D4.7		1.45	0.037
F33D4.8	F33D4.8		2.55	0.028
F33E11.3	F33E11.3		1.54	0.042
F33E2.10	F33E2.10		1.99	0.027
F33E2.6	F33E2.6		-1.35	0.048
F33G12.6	F33G12.6a		-1.39	0.03
F33G12.7	F33G12.7		1.78	0.02
F33H1.1	F33H1.1a	daf-19	-1.51	0.025
F33H1.4	F33H1.4		3.43	4.6e-05
F33H1.6	F33H1.6		1.59	0.046
F33H2.1	F33H2.1	dog-1	-1.63	0.038
F34D10.2	F34D10.2.1		2.08	0.0041
F34D10.4	F34D10.4.2		-1.71	0.044
F34D10.6	F34D10.6		1.47	0.019
F34D10.7	F34D10.7.1		-1.44	0.05
F34D6.7	F34D6.7		-11.75	7e-05
F34D6.8	F34D6.8		-12.45	4e-05
F35A5.1	F35A5.1		-1.79	0.024
F35B12.8	F35B12.8	glb-15	1.51	0.034
F35B3.5	F35B3.5a	pqn-34	-1.58	0.028
F35C5.3	F35C5.3		-2.9	0.023
F35C5.5	F35C5.5a	clec-62	1.72	0.02
F35C5.8	F35C5.8.1	clec-65	1.49	0.035
F35D11.7	F35D11.7	clec-136	-3.55	0.0099
F35D11.8	F35D11.8	clec-137	-14.35	0.0029
F35D11.9	F35D11.9	clec-138	-8.81	0.0022
F35E12.4	F35E12.4		1.58	0.035
F35E12.9	F35E12.9b		1.47	0.021
F35F10.1	F35F10.1		1.73	0.0058
F35G12.3	F35G12.3a	sel-5	-2.01	0.017
F35G2.2	F35G2.2.1		1.34	0.042
F35H10.2	F35H10.2		1.98	0.027
F35H10.5	F35H10.5		1.59	0.022
F35H8.5	F35H8.5	exc-7	-1.61	0.0098
F36A2.6	F36A2.6.1	rps-15	2.04	0.03
F36A2.8	F36A2.8		1.7	0.0097
F36A4.7	F36A4.7	ama-1	-1.73	0.037
F36D1.11	F36D1.11		-1.35	0.047
F36D1.8	F36D1.8		-1.74	0.019
F36D3.13	F36D3.13	srw-34	-1.33	0.036
F36D3.14	F36D3.14		7	5.8e-06
F36D3.9	F36D3.9	cpr-2	2.98	0.00089
F36D4.5	F36D4.5a		1.75	0.05
F36D4.6	F36D4.6		1.64	0.028
F36F12.5	F36F12.5	clec-207	-9.27	0.00054
F36F12.6	F36F12.6	clec-208	-3.94	0.015
F36F2.2	F36F2.2		1.44	0.023
F36F2.6	F36F2.6	fcp-1	1.89	0.0045
F36G9.1	F36G9.1	srw-57	-1.49	0.049
F36H1.12	F36H1.12		1.67	0.012
F36H5.4	F36H5.4		-1.36	0.044
F36H9.3	F36H9.3	dhs-13	1.4	0.046
F36H9.7	F36H9.7		-1.33	0.04
F37A8.5	F37A8.5		3.93	0.0028
F37B1.8	F37B1.8	gst-19	-1.46	0.049
F37B12.2	F37B12.2.2	gcs-1	-1.42	0.02
F37B4.11	F37B4.11	srj-54	-1.59	0.02
F37B4.3	F37B4.3	srh-243	-1.34	0.049
F37B4.6	F37B4.6	srh-241	-2.09	0.047
F37C12.10	F37C12.10		1.62	0.022
F37C12.12	F37C12.12	mec-14	-1.44	0.044
F37C12.17	F37C12.17	srb-7	1.75	0.043
F37C12.3	F37C12.3.2		1.77	0.026
F37D6.4	F37D6.4		-1.36	0.041
F37H8.2	F37H8.2		2.45	0.0066
F37H8.3	F37H8.3		1.48	0.028
F38A1.5	F38A1.5	clec-166	1.46	0.041
F38A1.8	F38A1.8		1.42	0.047
F38A5.2	F38A5.2a		-1.4	0.03
F38A6.1	F38A6.1a	pha-4	-1.52	0.017
F38B2.3	F38B2.3		-1.72	0.0079
F38B7.1	F38B7.1a		-1.41	0.038
F38B7.6	F38B7.6	srx-71	-1.46	0.046
F38C2.1	F38C2.1		1.48	0.023
F38E1.10	F38E1.10		-5.7	0.0046
F38E1.8	F38E1.8	srsx-22	-1.47	0.041
F39C12.1	F39C12.1		-1.42	0.043
F39C12.3	F39C12.3b	tsp-14	-1.62	0.018
F39D8.4	F39D8.4	nas-13	-1.61	0.037
F39E9.1	F39E9.1		-2.91	0.0015
F39E9.11	F39E9.11	btb-17	1.38	0.049
F39E9.9	F39E9.9		3.08	0.017
F39F10.4	F39F10.4		1.35	0.048
F39H11.1	F39H11.1		1.36	0.028
F39H11.2	F39H11.2a	tlf-1	-1.75	0.012
F40A3.5	F40A3.5		1.48	0.041
F40B1.1	F40B1.1	bath-13	2.35	0.00014
F40B5.1	F40B5.1		1.62	0.037
F40C5.1	F40C5.1		2.01	0.0065
F40D4.13	F40D4.13		1.76	0.0023
F40D4.3	F40D4.3	srh-159	-1.46	0.0073
F40D4.6	F40D4.6	srbc-25	2.2	0.02
F40D4.8	F40D4.8	srw-51	-1.55	0.033
F40E10.6	F40E10.6.1		-1.35	0.048
F40F11.3	F40F11.3		1.76	0.0048
F40F12.10	F40F12.10		1.51	0.036
F40F12.7	F40F12.7.2		1.56	0.031
F40F4.2	F40F4.2.2	lbp-2	1.68	0.042
F40F4.3	F40F4.3.4	lbp-1	1.28	0.049
F40F8.10	F40F8.10.1	rps-9	2.14	0.029
F40F8.8	F40F8.8.2		1.62	0.02
F40F9.3	F40F9.3		1.55	0.041
F40F9.6	F40F9.6a		-1.45	0.049
F40G12.2	F40G12.2		-1.52	0.032
F40G12.7	F40G12.7		1.55	0.038
F40G9.14	F40G9.14		-1.33	0.032
F40G9.3	F40G9.3	ubc-20	-2.31	0.035
F40G9.7	F40G9.7		-8.08	0.0083
F40H7.12	F40H7.12		2.67	0.00037
F41B4.2	F41B4.2b.2		1.6	0.043
F41B5.1	F41B5.1		2.28	0.00032
F41B5.3	F41B5.3	cyp-33C5	1.68	0.027
F41C3.1	F41C3.1		2.21	0.0066
F41C6.3	F41C6.3		-1.41	0.039
F41D3.1	F41D3.1	nhr-82	2.18	0.041
F41D3.2	F41D3.2		-1.37	0.046
F41D9.3	F41D9.3a	wrk-1	-1.53	0.048
F41F3.8	F41F3.8		1.87	0.028
F41G3.1	F41G3.1.2		1.67	0.04
F41G3.18	F41G3.18.1		1.53	0.037
F41G3.2	F41G3.2		-1.48	0.035
F41H10.2	F41H10.2.1		-1.42	0.027
F41H8.3	F41H8.3	srx-30	-1.43	0.037
F42A10.8	F42A10.8	nas-28	-1.37	0.048
F42A10.9	F42A10.9		1.6	0.018
F42A6.2	F42A6.2		-4.4	0.006
F42A6.7	F42A6.7a.2	hrp-1	-1.54	0.041
F42A9.2	F42A9.2	lin-49	-1.46	0.038
F42A9.6	F42A9.6		1.6	0.031
F42C5.3	F42C5.3		2.76	4.2e-05
F42C5.8	F42C5.8.1	rps-8	1.85	0.029
F42D1.3	F42D1.3	sprr-2	1.24	0.039
F42F12.4	F42F12.4.1		1.5	0.04
F42G4.7	F42G4.7		1.95	0.0044
F42G8.10	F42G8.10b.1		1.79	0.023
F42G9.2	F42G9.2	cyn-6	1.73	0.0085
F42G9.4	F42G9.4		1.83	0.021
F42H10.2	F42H10.2		1.38	0.025
F42H10.5	F42H10.5		-1.53	0.029
F43A11.8	F43A11.8		2.95	0.0021
F43C1.3	F43C1.3		-1.47	0.022
F43C11.1	F43C11.1		-4.15	0.0073
F43C11.12	F43C11.12		-5.64	0.014
F43C11.2	F43C11.2		-7.11	0.0096
F43C11.6	F43C11.6		1.7	0.023
F43D2.1	F43D2.1		1.61	0.0039
F43D2.6	F43D2.6		1.6	0.019
F43D9.1	F43D9.1		-1.59	0.028
F43D9.2	F43D9.2	rab-33	1.99	0.0023
F43D9.5	F43D9.5	taf-11.3	1.43	0.041
F43E12.1	F43E12.1		-1.47	0.0073
F43E2.11	F43E2.11		5.4	4.2e-05
F43E2.8	F43E2.8.2	hsp-4	-1.44	0.038
F43G6.3	F43G6.3		1.31	0.034
F43G6.8	F43G6.8		1.59	0.021
F43G6.9	F43G6.9.1	patr-1	-1.5	0.047
F43G9.13	F43G9.13.2		1.37	0.041
F44A2.1	F44A2.1a	tag-153	-1.58	0.042
F44A2.2	F44A2.2		2.18	0.0082
F44A2.4	F44A2.4	nhr-39	4.15	0.0014
F44B9.10	F44B9.10		1.47	0.039
F44C4.5	F44C4.5	ppt-1	1.63	0.004
F44C8.9	F44C8.9a	nhr-184	-1.65	0.024
F44E2.6	F44E2.6b		1.41	0.03
F44E2.9	F44E2.9		1.72	0.034
F44E5.5	F44E5.5		-6.37	1.4e-06
F44E7.2	F44E7.2		-1.48	0.023
F44G3.10	F44G3.10		3.8	0.00017
F44G3.11	F44G3.11	str-25	-1.37	0.038
F44G3.2	F44G3.2		-1.46	0.048
F44G3.5	F44G3.5	srxa-16	-1.55	0.045
F44G4.2	F44G4.2.1		1.41	0.032
F44G4.3	F44G4.3		1.49	0.035
F45C12.11	F45C12.11	sdz-18	1.47	0.046
F45C12.4	F45C12.4	btb-9	1.92	0.012
F45E12.5	F45E12.5a		1.59	0.0072
F45E4.5	F45E4.5		2.6	0.0086
F45E4.7	F45E4.7c		-1.65	0.035
F45E6.3	F45E6.3		1.57	0.022
F45F2.11	F45F2.11		2.04	0.004
F45F2.5	F45F2.5		-1.38	0.043
F45G2.9	F45G2.9		1.47	0.017
F45H10.1	F45H10.1.1	alh-7	1.59	0.03
F45H10.4	F45H10.4	drr-1	1.56	0.034
F45H11.3	F45H11.3b		-1.71	0.047
F45H11.4	F45H11.4	mgl-2	3.73	0.004
F45H11.6	F45H11.6		3.27	4.7e-05
F45H7.2	F45H7.2b	gei-1	1.81	0.0085
F46A8.1	F46A8.1		1.36	0.049
F46A8.2	F46A8.2		-1.31	0.044
F46A8.3	F46A8.3		-4.67	0.023
F46A8.4	F46A8.4		-2.72	0.017
F46A8.5	F46A8.5		-5.61	0.0094
F46A8.8	F46A8.8		-4.38	0.0043
F46B3.11	F46B3.11	srz-18	-1.34	0.027
F46B3.17	F46B3.17	col-163	-2.26	0.014
F46B3.7	F46B3.7		1.55	0.034
F46B6.12	F46B6.12.1		6.91	0.0002
F46B6.13	F46B6.13		-5.6	0.0011
F46B6.3	F46B6.3a	smg-4	-1.41	0.049
F46B6.5	F46B6.5b		-1.66	0.042
F46C3.3	F46C3.3	hum-4	-1.62	0.017
F46C5.2	F46C5.2.2		1.57	0.048
F46E10.1	F46E10.1b.1		-1.34	0.048
F46F11.12	F46F11.12		2.27	0.036
F46F11.4	F46F11.4	ubl-5	1.76	0.021
F46F2.3	F46F2.3		-1.52	0.037
F46F3.3	F46F3.3		1.91	0.042
F46F5.10	F46F5.10		-1.84	0.036
F46F5.3	F46F5.3		-1.75	0.014
F46F6.1	F46F6.1a.1		-1.7	0.044
F46F6.4	F46F6.4b	dyf-6	-1.35	0.048
F46G10.1	F46G10.1a.1		1.64	0.027
F46G11.3	F46G11.3	tag-257	-1.63	0.004
F46H5.8	F46H5.8	lact-1	-1.52	0.04
F46H6.5	F46H6.5		1.47	0.047
F47A4.1	F47A4.1b	lgc-47	-1.38	0.045
F47B10.2	F47B10.2		-1.67	0.005
F47B10.5	F47B10.5		2.1	0.0042
F47B7.1	F47B7.1		-4.54	0.0018
F47B7.3	F47B7.3		2.15	0.034
F47B8.4	F47B8.4		1.54	0.046
F47C12.11	F47C12.11		-1.82	0.035
F47D12.1	F47D12.1c	gar-2	-1.57	0.017
F47D2.3	F47D2.3	srt-3	-1.7	0.032
F47E1.5	F47E1.5		-1.64	0.027
F47G3.1	F47G3.1		-1.36	0.048
F47G6.1	F47G6.1	dyb-1	-1.43	0.036
F47G9.1	F47G9.1.1		-1.44	0.025
F47H4.10	F47H4.10	skr-5	1.97	0.018
F47H4.4	F47H4.4	fbxa-185	1.67	0.043
F47H4.7	F47H4.7	fbxa-187	1.56	0.014
F48A11.1	F48A11.1	chs-2	-1.69	0.0083
F48A11.2	F48A11.2		-1.35	0.048
F48A11.5	F48A11.5a	ubxn-3	-1.59	0.023
F48C1.4	F48C1.4		2.54	0.0011
F48C1.9	F48C1.9.2		4.34	0.0062
F48D6.3	F48D6.3	hlh-13	2.07	0.034
F48E3.9	F48E3.9		-1.46	0.048
F48E8.4	F48E8.4		2.02	0.0045
F48E8.6	F48E8.6		2.42	0.0096
F48F5.2	F48F5.2		-2.04	0.019
F48G7.2	F48G7.2		1.73	0.011
F49A5.6	F49A5.6	thn-4	-1.29	0.042
F49C12.12	F49C12.12		1.68	0.026
F49C12.14	F49C12.14		1.6	0.041
F49C12.6	F49C12.6		1.55	0.034
F49C5.1	F49C5.1	srx-119	-1.38	0.031
F49C5.10	F49C5.10		-1.42	0.021
F49C5.3	F49C5.3		1.4	0.045
F49C5.6	F49C5.6	str-223	2.28	0.0043
F49C5.9	F49C5.9		-1.77	0.038
F49E10.2	F49E10.2a		-1.5	0.034
F49E11.1	F49E11.1b	mbk-2	-1.37	0.038
F49E11.10	F49E11.10	scl-2	2.42	0.0073
F49E11.4	F49E11.4	scl-9	-6.76	0.00065
F49E12.10	F49E12.10		1.49	0.043
F49E12.2	F49E12.2	dod-23	1.46	0.028
F49E12.5	F49E12.5a	sra-13	-1.38	0.028
F49E12.6	F49E12.6		-1.45	0.048
F49E2.5	F49E2.5f.1		-1.67	0.0024
F49E7.1	F49E7.1a	rme-6	-1.64	0.034
F49F1.11	F49F1.11		-4.36	0.0034
F49F1.9	F49F1.9		-3.01	0.028
F49H12.7	F49H12.7		1.67	0.015
F49H6.13	F49H6.13		2.45	0.0039
F49H6.15	F49H6.15		1.9	0.041
F49H6.3	F49H6.3		1.92	0.034
F49H6.5	F49H6.5		2.34	0.017
F52B11.5	F52B11.5		2.03	0.02
F52C6.7	F52C6.7	bath-11	1.37	0.048
F52C9.8	F52C9.8a	pqe-1	-2.06	0.0067
F52D10.3	F52D10.3b.1	ftt-2	-1.41	0.048
F52D10.6	F52D10.6		-1.49	0.023
F52E1.14	F52E1.14		1.65	0.0076
F52E1.4	F52E1.4b	gcy-7	-1.55	0.035
F52F12.3	F52F12.3	mom-4	2.39	0.011
F52F12.7	F52F12.7		1.4	0.023
F52F12.9	F52F12.9		-1.63	0.043
F52G2.1	F52G2.1a	dcap-2	-1.52	0.044
F52H2.1	F52H2.1		-1.69	0.0082
F52H2.3	F52H2.3		1.46	0.029
F52H2.6	F52H2.6		2.87	3.1e-05
F53A10.2	F53A10.2a		-1.55	0.012
F53A2.5	F53A2.5	dro-1	1.78	0.0064
F53A9.5	F53A9.5		1.86	0.0027
F53A9.8	F53A9.8		2.05	0.015
F53B1.8	F53B1.8		-1.39	0.04
F53B2.6	F53B2.6	ham-1	-3.2	0.0081
F53B3.3	F53B3.3		-1.74	0.0043
F53B6.8	F53B6.8	fipr-26	1.63	0.049
F53B6.9	F53B6.9	fip-6	2.39	0.023
F53C11.5	F53C11.5b		-1.5	0.024
F53C11.6	F53C11.6	twk-32	-1.35	0.047
F53C11.7	F53C11.7.1	swan-2	-1.39	0.022
F53C11.9	F53C11.9		2.08	0.0084
F53C3.10	F53C3.10	srh-90	-1.37	0.037
F53C3.11	F53C3.11		-1.36	0.043
F53C3.13	F53C3.13b.1		-1.4	0.042
F53E10.5	F53E10.5		-1.64	0.022
F53F1.3	F53F1.3		1.35	0.041
F53F10.7	F53F10.7		2.01	0.044
F53F4.10	F53F4.10.1		1.58	0.0067
F53F4.13	F53F4.13.3		1.54	0.048
F53F4.17	F53F4.17		2.28	0.014
F53F4.4	F53F4.4		-1.44	0.036
F53F4.6	F53F4.6b	rdy-2	2.18	0.014
F53F8.6	F53F8.6		1.87	0.018
F53G2.4	F53G2.4c	pqn-42	-1.55	0.032
F53H1.1	F53H1.1		-1.48	0.044
F53H1.4	F53H1.4a		-1.83	0.0096
F53H2.2	F53H2.2	cnc-7	2.48	0.0018
F53H4.2	F53H4.2		1.47	0.013
F53H4.5	F53H4.5		-1.38	0.042
F54A3.3	F54A3.3	cct-3	-1.55	0.018
F54A5.3	F54A5.3a	shc-1	2.21	0.038
F54B11.3	F54B11.3b.2	unc-84	-1.71	0.0096
F54B11.4	F54B11.4		5.87	0.0011
F54B3.1	F54B3.1a		-2.01	0.011
F54B8.13	F54B8.13	nas-40	-4.25	0.0083
F54B8.2	F54B8.2	nhr-282	-1.33	0.046
F54B8.3	F54B8.3	fbxa-69	1.57	0.016
F54B8.4	F54B8.4		1.58	0.019
F54C1.7	F54C1.7.1	pat-10	2.44	0.0011
F54C4.3	F54C4.3		-1.64	0.038
F54C4.4	F54C4.4		1.43	0.038
F54C8.5	F54C8.5	rheb-1	1.57	0.007
F54C8.6	F54C8.6		5.63	1.8e-06
F54C9.3	F54C9.3		1.63	0.02
F54C9.9	F54C9.9		-1.39	0.04
F54D1.4	F54D1.4	nhr-7	-1.67	0.0061
F54D10.2	F54D10.2	fbxa-24	1.59	0.024
F54D11.2	F54D11.2.1		-1.72	0.02
F54D12.11	F54D12.11		3.88	4.4e-05
F54D12.9	F54D12.9		-2.9	0.017
F54D5.14	F54D5.14		-1.46	0.047
F54D5.3	F54D5.3.2		1.49	0.04
F54D5.4	F54D5.4.1		2.59	0.017
F54D7.4	F54D7.4	zig-7	1.61	0.018
F54D7.6	F54D7.6		2.15	0.043
F54D7.7	F54D7.7		1.48	0.04
F54D8.2	F54D8.2.6	tag-174	1.55	0.016
F54E2.3	F54E2.3c	ketn-1	-1.52	0.049
F54E4.1	F54E4.1	rbc-1	-1.65	0.027
F54E4.2	F54E4.2		2.25	0.04
F54F11.2	F54F11.2		-1.47	0.029
F54F3.3	F54F3.3		1.52	0.037
F54F7.3	F54F7.3		1.73	0.025
F54F7.9	F54F7.9		2.45	0.00057
F54G2.1	F54G2.1b		-1.71	0.023
F54H12.1	F54H12.1a	aco-2	3.51	1.1e-05
F55A11.3	F55A11.3	hrd-1	-1.44	0.039
F55A12.5	F55A12.5		-1.37	0.049
F55A3.1	F55A3.1	marc-6	2.23	0.00029
F55A3.6	F55A3.6		1.49	0.036
F55A4.2	F55A4.2		-1.33	0.048
F55A8.2	F55A8.2d	egl-4	-2.89	0.0012
F55B11.4	F55B11.4		2.46	0.0027
F55B11.6	F55B11.6		1.91	0.034
F55B12.4	F55B12.4.1		1.7	0.036
F55C12.5	F55C12.5a		-1.34	0.049
F55C12.6	F55C12.6		1.47	0.045
F55C12.7	F55C12.7.1	tag-234	2.26	0.00074
F55C5.5	F55C5.5	tsfm-1	1.93	0.042
F55C7.7	F55C7.7f	unc-73	-1.66	0.021
F55C9.11	F55C9.11		3.88	0.00038
F55D12.5	F55D12.5		-1.48	0.047
F55F1.2	F55F1.2		-1.46	0.038
F55F10.1	F55F10.1		-1.58	0.03
F55F3.3	F55F3.3.1		1.57	0.0052
F55F8.2	F55F8.2b		-1.33	0.048
F55F8.3	F55F8.3		-1.38	0.045
F55G11.2	F55G11.2		-1.56	0.016
F55G11.4	F55G11.4		1.6	0.023
F55G7.1	F55G7.1		-1.97	0.0049
F55H12.2	F55H12.2		1.71	0.024
F55H2.1	F55H2.1	sod-4	1.4	0.044
F55H2.5	F55H2.5		1.84	0.0021
F55H2.6	F55H2.6.1	clu-1	-1.5	0.049
F56A11.7	F56A11.7		-1.72	0.038
F56A3.3	F56A3.3a.2	npp-6	-1.43	0.05
F56A4.6	F56A4.6		2.76	0.0036
F56A4.9	F56A4.9		-1.43	0.033
F56A8.7	F56A8.7a	unc-64	1.82	0.029
F56B3.10	F56B3.10	gst-40	1.58	0.047
F56C11.3	F56C11.3		1.83	0.0056
F56C11.5	F56C11.5a		1.62	0.007
F56C3.8	F56C3.8		-2.03	0.038
F56C4.4	F56C4.4		1.53	0.039
F56C9.10	F56C9.10b.1		-1.71	0.035
F56D1.2	F56D1.2		3.25	6.8e-06
F56D12.4	F56D12.4c.2	jip-1	-1.47	0.029
F56D2.8	F56D2.8		-3.38	0.024
F56D3.1	F56D3.1.2		-1.46	0.037
F56D6.10	F56D6.10	dct-8	1.83	0.012
F56D6.11	F56D6.11		2.39	0.046
F56D6.7	F56D6.7	srz-62	1.88	0.049
F56F11.1	F56F11.1		1.57	0.049
F56F12.1	F56F12.1		-2.06	0.0027
F56F3.3	F56F3.3		4.47	0.00063
F56H1.7	F56H1.7		1.7	0.015
F56H9.2	F56H9.2.2		1.57	0.009
F56H9.4	F56H9.4	gpa-9	1.32	0.049
F57A10.2	F57A10.2		1.84	0.013
F57A8.5	F57A8.5	nhr-192	4.91	0.0021
F57B1.3	F57B1.3	col-159	-1.34	0.045
F57B9.2	F57B9.2	let-711	1.72	0.023
F57B9.6	F57B9.6a.2	inf-1	-1.54	0.045
F57C12.4	F57C12.4	mrp-2	-1.4	0.041
F57C12.5	F57C12.5c	mrp-1	-1.36	0.035
F57C2.4	F57C2.4		1.71	0.0068
F57C7.1	F57C7.1a		-1.52	0.037
F57C9.2	F57C9.2	clec-90	-1.52	0.047
F57F5.4	F57F5.4a.2	add-2	1.41	0.031
F57G4.1	F57G4.1		3.63	0.00014
F57G4.6	F57G4.6		3.16	0.0015
F57G4.7	F57G4.7		2.19	0.00017
F57G4.8	F57G4.8	fbxa-192	2.65	2.8e-05
F57H12.7	F57H12.7	mec-17	1.51	0.043
F58A3.1	F58A3.1a.1	ldb-1	-1.58	0.035
F58A4.1	F58A4.1		-2.12	0.028
F58A4.10	F58A4.10.1	ubc-7	1.5	0.04
F58A4.11	F58A4.11	gei-13	-1.56	0.024
F58A4.5	F58A4.5	clec-161	-3.44	0.0048
F58A6.1	F58A6.1		1.89	0.0028
F58A6.2	F58A6.2		1.77	0.021
F58B3.1	F58B3.1	lys-4	1.73	0.015
F58B3.2	F58B3.2	lys-5	1.52	0.027
F58B3.5	F58B3.5	mrs-1	-2.41	0.0022
F58B3.6	F58B3.6		1.32	0.043
F58B4.1	F58B4.1a	nas-31	-1.58	0.032
F58B6.3	F58B6.3a	par-2	1.5	0.028
F58D5.2	F58D5.2a		2	0.0039
F58D5.3	F58D5.3		1.48	0.046
F58E1.2	F58E1.2	fbxb-25	-1.48	0.047
F58E1.4	F58E1.4		12.46	2.5e-07
F58E10.7	F58E10.7		2.17	0.006
F58E2.5	F58E2.5		2.54	0.0097
F58E6.11	F58E6.11		1.62	0.013
F58F12.4	F58F12.4		1.33	0.045
F58F9.3	F58F9.3b		1.5	0.019
F58F9.6	F58F9.6		-3.21	0.026
F58F9.8	F58F9.8		-2.37	0.038
F58F9.9	F58F9.9		-1.73	0.047
F58G1.7	F58G1.7		2.11	0.00049
F58G4.1	F58G4.1	myo-5	-1.77	0.017
F58G6.7	F58G6.7		1.38	0.043
F58H7.5	F58H7.5		1.64	0.024
F58H7.7	F58H7.7		1.51	0.018
F59A1.12	F59A1.12		-1.41	0.036
F59A1.16	F59A1.16		-2.77	0.017
F59A1.6	F59A1.6		-3.58	0.017
F59A1.7	F59A1.7	fbxa-108	1.32	0.048
F59A2.6	F59A2.6		-2.19	0.002
F59A3.10	F59A3.10		-1.35	0.048
F59A6.10	F59A6.10		2.41	0.017
F59A6.11	F59A6.11		-1.76	0.043
F59A6.12	F59A6.12		2.47	0.00035
F59A6.3	F59A6.3		-2.08	0.043
F59B10.1	F59B10.1	pqn-47	-1.58	0.018
F59B10.6	F59B10.6		-1.34	0.049
F59B2.12	F59B2.12		-27.09	6.4e-05
F59B2.14	F59B2.14		-1.75	0.027
F59B2.3	F59B2.3.1		1.66	0.037
F59C12.2	F59C12.2a	ser-1	-1.35	0.047
F59C12.4	F59C12.4		1.67	0.043
F59C6.14	F59C6.14b		1.58	0.029
F59C6.15	F59C6.15		3.25	0.0021
F59C6.16	F59C6.16		2.91	0.0094
F59D12.1	F59D12.1		1.6	0.0057
F59D12.5	F59D12.5		1.5	0.016
F59D6.3	F59D6.3		1.79	0.043
F59D6.7	F59D6.7		1.46	0.039
F59E11.10	F59E11.10	nhr-195	1.46	0.049
F59E12.6	F59E12.6b		-1.59	0.029
F59F3.1	F59F3.1	ver-3	-3.34	0.0011
F59G1.3	F59G1.3	vps-35	-1.76	0.034
F59G1.4	F59G1.4		-1.37	0.032
F59G1.6	F59G1.6	lin-4	-2.05	0.018
F59H5.3	F59H5.3	bath-12	1.34	0.043
F59H6.11	F59H6.11	bath-5	1.39	0.049
F59H6.12	F59H6.12	btb-4	1.53	0.012
H01G02.1	H01G02.1		1.47	0.042
H01G02.2	H01G02.2		-1.36	0.036
H01M10.3	H01M10.3	ttr-42	1.72	0.0042
H02I12.8	H02I12.8	cyp-31A2	1.52	0.034
H03E18.2	H03E18.2		1.64	0.023
H03G16.3	H03G16.3		2.03	0.013
H03G16.5	H03G16.5		1.54	0.047
H04J21.3	H04J21.3a.2	gip-1	-1.4	0.034
H04M03.7	H04M03.7	srv-20	-1.4	0.037
H05C05.2	H05C05.2a		-1.48	0.047
H05G16.1	H05G16.1	frm-3	-1.68	0.039
H06I04.3	H06I04.3a		-1.7	0.011
H06I04.4	H06I04.4a.1	ubl-1	2.19	0.034
H06I04.7	H06I04.7	fipr-29	2	0.0078
H08M01.2	H08M01.2b		-1.49	0.036
H09G03.2	H09G03.2c	frm-8	-1.41	0.04
H13N06.7	H13N06.7		3.58	0.0032
H14A12.4	H14A12.4	mls-1	1.55	0.012
H14A12.5	H14A12.5		1.82	0.0037
H14N18.1	H14N18.1b.1	unc-23	-1.59	0.016
H15N14.1	H15N14.1f	adr-1	-13.79	1.2e-08
H16D19.2	H16D19.2	clec-14	2.26	0.049
H16O14.1	H16O14.1	kcc-2	-1.56	0.013
H18N23.2	H18N23.2c		-1.67	0.0079
H19M22.2	H19M22.2b	let-805	-1.66	0.0058
H20J04.6	H20J04.6		6.39	1.6e-06
H20J04.7	H20J04.7		-1.82	0.018
H24G06.1	H24G06.1b		-1.57	0.0052
H24O09.1	H24O09.1	srbc-40	-1.66	0.036
H25K10.4	H25K10.4		-1.35	0.049
H25K10.7	H25K10.7	srw-61	4.9	1e-07
H25P06.4	H25P06.4		1.97	0.0018
H27C11.1	H27C11.1a	nhr-97	2.19	0.00066
H28G03.1	H28G03.1c.1		-1.28	0.048
H28G03.6	H28G03.6	mtm-5	-1.39	0.049
H29C22.1	H29C22.1		2.32	5.9e-05
H30A04.1	H30A04.1a	eat-20	-1.74	0.01
H32K16.2	H32K16.2		1.67	0.031
H32K21.1	H32K21.1		1.66	0.017
H34C03.2	H34C03.2		1.57	0.032
H36L18.2	H36L18.2.1		2.08	0.017
H38K22.1	H38K22.1	evl-14	-1.59	0.025
H38K22.5	H38K22.5a	gly-6	2.2	0.0044
H39E23.1	H39E23.1b	par-1	-1.78	0.03
H40L08.3	H40L08.3		-1.42	0.039
JC8.10	JC8.10c.1	unc-26	-2.07	0.0063
JC8.8	JC8.8.1	ttr-51	1.98	0.00027
K01A11.1	K01A11.1		3.31	3e-05
K01A2.2	K01A2.2a	far-7	1.84	0.017
K01A2.8	K01A2.8a	mps-2	1.36	0.049
K01C8.7	K01C8.7a		1.37	0.046
K01D12.13	K01D12.13a	cdr-7	-1.33	0.039
K01D12.2	K01D12.2		-1.55	0.024
K01G12.3	K01G12.3		-1.73	0.026
K01G5.2	K01G5.2b	hpl-2	-1.41	0.03
K01G5.4	K01G5.4.1	ran-1	1.49	0.032
K01H12.3	K01H12.3	nhr-38	-1.76	0.044
K02A11.3	K02A11.3		1.45	0.033
K02A11.4	K02A11.4		2.5	0.0074
K02A4.1	K02A4.1	bcat-1	-1.58	0.016
K02A4.2	K02A4.2.1	gpc-1	-1.41	0.03
K02B12.6	K02B12.6		-2.52	0.031
K02B2.5	K02B2.5.1	rps-25	1.91	0.045
K02B7.3	K02B7.3a		1.47	0.036
K02D3.1	K02D3.1		-1.37	0.024
K02D7.2	K02D7.2		1.75	0.017
K02E11.2	K02E11.2	sre-7	-1.34	0.049
K02E11.6	K02E11.6		1.71	0.036
K02E2.3	K02E2.3	srh-177	-1.36	0.036
K02E2.7	K02E2.7		1.69	0.038
K02E7.1	K02E7.1b		1.97	0.029
K02E7.10	K02E7.10		3.28	0.00013
K02E7.6	K02E7.6.1		-1.4	0.048
K02F2.2	K02F2.2.1		-1.38	0.04
K02F3.9	K02F3.9		1.42	0.045
K02H11.5	K02H11.5	str-216	-1.8	0.031
K03A11.1	K03A11.1		-1.73	0.05
K03B4.5	K03B4.5	srx-77	-1.6	0.021
K03B8.2	K03B8.2	nas-17	-8.77	0.0022
K03B8.3	K03B8.3	nas-18	-1.34	0.029
K03D3.2	K03D3.2		2.03	0.038
K03D3.5	K03D3.5		-10.06	0.00034
K03D7.3	K03D7.3		-1.91	0.0036
K03E5.3	K03E5.3	cdk-2	2.5	0.0013
K03H1.10	K03H1.10.1		1.49	0.035
K03H1.13	K03H1.13		1.51	0.023
K03H1.4	K03H1.4.1	ttr-2	1.54	0.013
K04A8.10	K04A8.10		-1.39	0.034
K04A8.8	K04A8.8	spp-20	5.06	0.015
K04D7.4	K04D7.4		-1.52	0.038
K04F1.9	K04F1.9		2.11	0.00071
K04F10.4	K04F10.4e	bli-4	1.38	0.046
K04G2.1	K04G2.1.1	iftb-1	1.47	0.014
K04G7.3	K04G7.3b	ogt-1	-1.53	0.049
K04H4.2	K04H4.2a.2		-1.48	0.044
K04H4.6	K04H4.6a	crn-6	1.5	0.034
K04H8.1	K04H8.1	clec-116	-1.61	0.019
K04H8.3	K04H8.3		-1.81	0.019
K05B2.5	K05B2.5c	pes-22	-1.49	0.019
K05C4.2	K05C4.2.1		1.46	0.034
K05D4.1	K05D4.1		-1.35	0.046
K05D4.2	K05D4.2	str-106	-1.59	0.049
K05D4.5	K05D4.5		2.31	0.022
K05F6.1	K05F6.1	fbxb-49	1.48	0.044
K06A4.7	K06A4.7.1		1.73	0.0066
K06B4.12	K06B4.12	twk-34	4.54	1.9e-05
K06B4.6	K06B4.6	nhr-268	-1.29	0.047
K06B4.7	K06B4.7	nhr-197	1.87	0.019
K06C4.17	K06C4.17		-1.39	0.049
K07A1.13	K07A1.13		1.51	0.036
K07A1.15	K07A1.15		1.53	0.012
K07A1.16	K07A1.16	aqp-9	1.4	0.043
K07A1.6	K07A1.6		1.71	0.0036
K07A1.7	K07A1.7		-1.67	0.048
K07A9.4	K07A9.4		1.81	0.029
K07C11.8	K07C11.8.1		1.67	0.015
K07C5.1	K07C5.1	arx-2	1.84	0.01
K07C6.11	K07C6.11	srx-68	-1.9	0.0046
K07C6.15	K07C6.15	srx-70	-1.64	0.03
K07C6.6	K07C6.6	srx-63	5.14	4.8e-06
K07C6.7	K07C6.7	srx-64	-1.49	0.035
K07D8.1	K07D8.1.1	mup-4	-1.66	0.0045
K07E12.1	K07E12.1a.2	dig-1	-1.72	0.0079
K07E3.1	K07E3.1		-1.39	0.042
K07E8.12	K07E8.12	sri-44	4	4.5e-05
K07E8.8	K07E8.8		-1.35	0.048
K07F5.12	K07F5.12		1.51	0.019
K07F5.16	K07F5.16		1.59	0.006
K07G5.1	K07G5.1	crml-1	-2.46	0.0031
K07H8.10	K07H8.10.1		-1.58	0.036
K07H8.12	K07H8.12		7.94	3.1e-05
K07H8.8	K07H8.8		2.51	0.01
K08A2.1	K08A2.1.2		-1.43	0.039
K08A2.5	K08A2.5c.2	nhr-88	1.44	0.05
K08A8.1	K08A8.1a	mek-1	-1.47	0.032
K08B12.2	K08B12.2b		-1.65	0.02
K08B4.1	K08B4.1a	lag-1	-1.57	0.024
K08B4.2	K08B4.2		1.74	0.016
K08B4.3	K08B4.3	ugt-19	1.51	0.048
K08B4.6	K08B4.6	cpi-1	1.42	0.02
K08B4.7	K08B4.7		1.51	0.018
K08C7.2	K08C7.2.2	fmo-1	1.52	0.034
K08C9.6	K08C9.6		-3.27	0.0098
K08D9.5	K08D9.5		-1.35	0.047
K08E3.8	K08E3.8	mdt-29	-1.46	0.034
K08E5.2	K08E5.2b.1	nac-3	-1.49	0.03
K08E5.5	K08E5.5		-1.36	0.017
K08F11.1	K08F11.1		1.77	0.034
K08F4.12	K08F4.12		1.92	0.017
K08G2.10	K08G2.10	srh-294	-1.35	0.047
K08G2.16	K08G2.16		-1.45	0.039
K08H10.2	K08H10.2a.2		-1.47	0.048
K08H10.3	K08H10.3a		-1.41	0.026
K08H10.9	K08H10.9		1.6	0.0065
K09A11.1	K09A11.1		-1.57	0.034
K09A9.1	K09A9.1		-1.47	0.024
K09B11.1	K09B11.1	pik-1	4.12	2.2e-06
K09B11.9	K09B11.9a		-1.62	0.012
K09C4.5	K09C4.5		-1.43	0.048
K09C6.6	K09C6.6		1.93	0.031
K09C8.2	K09C8.2		-2.31	0.046
K09D9.13	K09D9.13	srw-89	1.87	0.005
K09D9.4	K09D9.4	srh-6	-1.77	0.0092
K09D9.9	K09D9.9		-1.83	0.012
K09E3.4	K09E3.4		4.2	0.0073
K09F5.6	K09F5.6		-1.48	0.045
K09H11.7	K09H11.7		-1.52	0.033
K09H9.8	K09H9.8		1.91	0.018
K10C2.3	K10C2.3		-1.91	0.014
K10C2.6	K10C2.6		2.36	0.0039
K10C2.7	K10C2.7		2	0.015
K10C2.8	K10C2.8		1.52	0.019
K10C3.2	K10C3.2.1		-1.53	0.018
K10C9.1	K10C9.1		1.81	0.027
K10D11.2	K10D11.2		1.78	0.041
K10D2.3	K10D2.3	cid-1	-1.69	0.035
K10D2.6	K10D2.6.1	emb-8	-1.52	0.042
K10D3.2	K10D3.2	unc-14	-1.45	0.023
K10D6.2	K10D6.2a		1.7	0.0039
K10E9.1	K10E9.1		-2.4	0.0073
K10F12.8	K10F12.8		-2.6	0.024
K10G4.4	K10G4.4		-1.51	0.023
K10G4.8	K10G4.8	srw-46	1.86	0.043
K10G6.1	K10G6.1	lin-31	-1.54	0.021
K10G6.3	K10G6.3	sea-2	-1.79	0.023
K10H10.12	K10H10.12		1.46	0.049
K11C4.3	K11C4.3a	unc-70	-1.68	0.015
K11D12.10	K11D12.10b	mlk-1	-1.68	0.01
K11D12.13	K11D12.13		1.55	0.013
K11D12.6	K11D12.6		-2.92	0.024
K11D12.8	K11D12.8		1.47	0.039
K11D2.3	K11D2.3b	unc-101	1.62	0.043
K11D9.2	K11D9.2a.1	sca-1	-1.51	0.047
K11D9.3	K11D9.3.3		1.48	0.019
K11E4.5	K11E4.5a	nhr-71	-1.33	0.042
K11E8.1	K11E8.1e.2	unc-43	-1.46	0.048
K11G9.3	K11G9.3		-1.59	0.033
K11G9.6	K11G9.6.2	mtl-1	2.08	0.0015
K11H3.5	K11H3.5		1.77	0.0035
K11H3.6	K11H3.6		1.63	0.0091
K12B6.9	K12B6.9		1.64	0.017
K12C11.6	K12C11.6		1.79	0.024
K12C11.7	K12C11.7		1.61	0.032
K12D9.11	K12D9.11	srw-135	5.85	1.3e-05
K12D9.13	K12D9.13	srw-131	-1.29	0.043
K12G11.5	K12G11.5	srx-76	8.57	1.4e-06
K12G11.6	K12G11.6		2.73	7e-05
K12H6.1	K12H6.1	nhr-119	3.14	0.00094
K12H6.2	K12H6.2		1.52	0.049
K12H6.3	K12H6.3	fut-4	1.39	0.047
K12H6.4	K12H6.4		-10.21	0.00045
K12H6.5	K12H6.5		-3.41	0.02
K12H6.8	K12H6.8		-9.53	0.00011
K12H6.9	K12H6.9		-10.42	0.00022
LLC1.2	LLC1.2.2		1.42	0.048
M01B2.1	M01B2.1	kin-30	-2	0.0013
M01B2.13	M01B2.13		1.79	0.04
M01B2.2	M01B2.2	srd-28	-1.69	0.023
M01D1.7	M01D1.7	fbxb-39	3.47	0.0056
M01E11.5	M01E11.5.1	cey-3	1.56	0.035
M01E5.3	M01E5.3c		-1.42	0.04
M01F1.6	M01F1.6		1.78	0.03
M01G12.14	M01G12.14		-1.36	0.045
M01G12.2	M01G12.2		1.71	0.043
M01G12.9	M01G12.9		-1.53	0.016
M01H9.4	M01H9.4c		1.45	0.047
M02B7.4	M02B7.4		1.79	0.011
M02B7.5	M02B7.5		-1.77	0.0022
M02B7.7	M02B7.7		1.42	0.047
M02E1.1	M02E1.1b.1		-1.66	0.041
M02H5.1	M02H5.1	nhr-99	-1.4	0.039
M02H5.8	M02H5.8		1.56	0.029
M03B6.3	M03B6.3		-1.57	0.006
M03B6.4	M03B6.4		1.58	0.01
M03B6.5	M03B6.5		1.57	0.029
M03D4.3	M03D4.3		2.18	0.017
M03D4.4	M03D4.4b.1		-1.5	0.035
M03E7.4	M03E7.4		-1.42	0.034
M03F4.7	M03F4.7b	calu-1	-1.28	0.049
M04D5.3	M04D5.3		1.62	0.038
M04D8.3	M04D8.3	ins-23	3.45	0.00027
M04F3.1	M04F3.1.1	rpa-2	1.44	0.025
M05D6.6	M05D6.6.1		-1.36	0.044
M05D6.7	M05D6.7	gbh-2	1.51	0.015
M110.4	M110.4b	ifg-1	2.34	0.00018
M117.3	M117.3		1.88	0.0063
M117.5	M117.5	fbxb-4	1.67	0.045
M142.5	M142.5		-1.78	0.023
M153.2	M153.2		1.61	0.021
M162.5	M162.5.1		1.44	0.037
M162.8	M162.8	fbxa-118	3.52	8.9e-05
M163.5	M163.5		-1.76	0.038
M176.10	M176.10		-9.51	0.00017
M176.5	M176.5		1.42	0.035
M18.2	M18.2	dlc-2	1.5	0.037
M199.5	M199.5	col-135	-1.64	0.048
M28.10	M28.10		4.18	8.1e-06
M28.5	M28.5.1		-1.35	0.044
M6.3	M6.3	pha-2	3.09	0.0096
M60.4	M60.4b.2		1.39	0.048
M7.1	M7.1	let-70	-1.29	0.048
M7.10	M7.10		-5.13	0.01
M7.9	M7.9		-4.38	0.022
MTCE.11	MTCE.11		1.76	0.016
MTCE.12	MTCE.12		2.49	0.0069
MTCE.16	MTCE.16		1.52	0.04
MTCE.21	MTCE.21	ctb-1	1.74	0.047
MTCE.23	MTCE.23		2.69	0.00023
MTCE.25	MTCE.25		2.59	0.024
MTCE.3	MTCE.3		4.67	0.00091
MTCE.31	MTCE.31		2.65	0.018
MTCE.33	MTCE.33		2.86	1.6e-05
MTCE.34	MTCE.34		3.41	0.021
MTCE.35	MTCE.35		1.98	0.032
MTCE.4	MTCE.4		7.29	0.00035
MTCE.7	MTCE.7		2.27	0.0023
R01B10.1	R01B10.1b	cpi-2	3.24	0.0008
R02C2.6	R02C2.6		1.45	0.043
R02D3.6	R02D3.6	grl-19	-2.99	0.035
R02D5.3	R02D5.3		1.84	0.0086
R02E12.2	R02E12.2a	mop-25.1	-1.47	0.045
R02E12.5	R02E12.5		2.43	0.0013
R02E12.6	R02E12.6.2		1.41	0.025
R02F11.1	R02F11.1		-1.41	0.049
R03D7.1	R03D7.1		-1.42	0.036
R03D7.2	R03D7.2		-1.66	0.017
R03D7.3	R03D7.3		4.77	0.00011
R03E9.3	R03E9.3b	abts-4	-1.42	0.034
R03G5.1	R03G5.1a.3	eft-4	-1.47	0.023
R03H10.2	R03H10.2		-1.39	0.042
R03H10.4	R03H10.4		-6.12	0.0047
R03H4.6	R03H4.6		-1.86	0.0076
R03H4.7	R03H4.7	srsx-20	1.33	0.044
R03H4.8	R03H4.8		5.92	1.4e-06
R04A9.2	R04A9.2		-1.43	0.048
R04A9.3	R04A9.3		-1.49	0.026
R04D3.10	R04D3.10	srxa-8	2.08	0.047
R04F11.2	R04F11.2.1		1.38	0.044
R04F11.4	R04F11.4a	twk-13	-1.5	0.028
R05C11.3	R05C11.3		-2.01	0.0091
R05D11.1	R05D11.1	daf-8	3.2	0.014
R05D11.4	R05D11.4		-1.4	0.048
R05F9.10	R05F9.10	sgt-1	-1.45	0.048
R05G6.8	R05G6.8	plc-4	-1.5	0.027
R05H10.1	R05H10.1		1.67	0.013
R05H10.3	R05H10.3b		-1.47	0.031
R05H5.5	R05H5.5		1.43	0.041
R06B10.3	R06B10.3	clec-150	1.46	0.02
R06C1.3	R06C1.3	wve-1	-1.58	0.017
R06C1.4	R06C1.4		3.67	2.2e-06
R06C7.3	R06C7.3.3	dhp-1	-1.46	0.02
R06C7.4	R06C7.4.1	cpg-3	1.57	0.028
R06F6.2	R06F6.2		1.48	0.024
R06F6.4	R06F6.4	set-14	-1.46	0.043
R07B1.1	R07B1.1	vab-15	2.28	0.031
R07B5.4	R07B5.4	sru-38	2.43	0.011
R07B5.8	R07B5.8a.1		-1.48	0.046
R07B5.9	R07B5.9		-1.54	0.049
R07B7.1	R07B7.1	clh-6	1.56	0.036
R07C3.3	R07C3.3		-1.53	0.05
R07E3.6	R07E3.6		-1.57	0.014
R07E4.1	R07E4.1b		-1.45	0.037
R07E4.3	R07E4.3		1.64	0.037
R07E4.6	R07E4.6a	kin-2	-1.37	0.042
R07E5.1	R07E5.1		-1.39	0.043
R07E5.7	R07E5.7.1		1.38	0.028
R08A2.6	R08A2.6		-1.35	0.025
R08B4.4	R08B4.4		2.06	0.049
R08C7.5	R08C7.5		-1.63	0.044
R08E3.1	R08E3.1a		1.36	0.044
R08E3.3	R08E3.3a		-1.44	0.036
R08E3.4	R08E3.4b		-1.73	0.026
R08F11.7	R08F11.7		1.48	0.046
R09A1.1	R09A1.1	ergo-1	-1.62	0.041
R09B5.13	R09B5.13	cnc-11	1.55	0.027
R09B5.3	R09B5.3	cnc-2	3.75	5.5e-05
R09D1.3	R09D1.3		-1.68	0.038
R09D1.5	R09D1.5		1.68	0.041
R09D1.9	R09D1.9		2.53	0.031
R09E10.5	R09E10.5		3.01	7e-05
R09E10.7	R09E10.7	pqn-55	-1.61	0.013
R09E10.8	R09E10.8		-3.25	0.02
[truncated: 1,318 more rows]

## Sheet: mRNAs targeted by miRNAs
Microarray (OVERALL)					miRNA fold change in adr-1;adr-2 vs WT	mRNA targets Increased in Microarray	mRNA Targets Decreased in Microarray	Total mRNA targets affected in Microarray	Total predicted mRNA targets		miRNA; fold change -->	miR-800	6.47		miR-1830	5.72		miR-358	3.77		miR-243	2.79		miR-73	2.51		miR-34	2.46		miR-797	2.42		miR-43	2.28		miR-62	2.15		miR-60	2		miR-2	1.97		miR-83	1.91		miR-46	1.78
	Genes	%		miR-800	6.47	0	6	6	31		mRNA target; fold change -->	C48A7.1	-1.66		C25D7.12	-1.4		F39C12.3	-1.62		C48A7.1	-1.66		T07F10.4	-1.48		F11E6.3	-1.71		Y75B8A.6	-1.7		Y75B8A.6	-1.7		T07F10.4	-1.48		R160.1	-1.54		C01H6.5	-1.61		B0379.6	-1.4		C36F7.1	-1.72
mRNAs Decreased	1571	47.3621		miR-1830	5.72	0	3	3	11			C18C4.7	-1.38		C48D5.1	-1.48		D1014.4	1.32		H18N23.1			F42H10.5	-1.53		ZK1151.1	-2.12		K09B11.9	-1.62		K09B11.9	-1.62		T13H5.1	-1.64		C27D6.4	-1.31		C07A12.1	-1.41		C07G1.5	-1.56		F49E11.1	-1.37
mRNAs Increased	1746	52.6379		miR-358	3.77	2	1	3	22			F46E10.1	-1.34		C54G7.3	-1.54		F22A3.1	2.94		C04D8.1			Y71G12B.11	-1.77		ZK892.1	-1.44		Y48G8AL.1	-1.54		Y48G8AL.1	-1.54		C04C11.2	-1.5		M02B7.5	-1.77		C07G1.5	-1.56		C34H3.1	-1.36		T02C5.5	-1.52
total affected	3317			miR-243	2.79	0	1	1	7			Y105E8A.24	-1.52		C04A2.3			C07H6.1			F20D12.5			F17C8.1	-1.5		ZC101.2	-1.53		C09H6.2	-1.44		C09H6.2	-1.44		C26B2.3	-1.48		Y46G5A.1	-1.53		C08B11.9	-1.53		C42C1.4	-1.43		C11G10.1	1.5
				miR-73	2.51	8	11	19	101			F29F11.6	-1.49		F23H12.4			T23E7.4			Y73F4A.1			ZK909.2	-1.43		C26G2.2	-1.48		C07G1.5	-1.56		C07G1.5	-1.56		T19B4.2	-1.91		Y48B6A.12	-1.51		C09H6.2	-1.44		C48A7.1	-1.66		C38H2.2	1.54
				miR-34	2.46	3	7	10	29			C48D5.1	-1.48		F25F2.2			C09B8.3			C51E3.2			C26B2.3	-1.48		K07E12.1	-1.72		F28F5.3	-1.49		F28F5.3	-1.49		R04F11.4	-1.5		R107.6	-1.5		C23F12.1	-1.6		F18C12.2	-1.64		C41C4.6	1.63
				miR-797	2.42	22	47	69	326			C56G7.3			F32A11.1			C18H9.1			Y39A1A.10			R13A1.2	-1.73		F28B12.2	-1.55		C34G6.1	-1.62		C34G6.1	-1.62		C05C9.3	-1.48		ZC477.9	-1.51		C25F6.2	-1.39		F35B3.5	-1.58		F45H11.4	3.73
				miR-43	2.28	22	47	69	326			C01C4.2			F33C8.1			C38C10.3						Y92H12A.2	-1.53		F18A1.3	1.42		F59A2.6	-2.19		F59A2.6	-2.19		C28H8.6	-1.49		F57C12.5	-1.36		C26G2.2	-1.48		F39C12.3	-1.62		ZC190.4	3.59
				miR-62	2.15	7	13	20	105			C31H2.3			F48F7.1			E03A3.5						W01G7.1	-2.02		F56A8.7	1.82		R08E3.3	-1.44		R08E3.3	-1.44		R11G1.6	-1.48		F09E5.1	-1.44		C27D6.4	-1.31		F43D9.1	-1.59		4R79.1
				miR-60	2	12	25	37	172			D2024.7			W05E10.3			Y66H1A.5						R153.1	-1.51		F45E4.5	2.6		T13H5.1	-1.64		T13H5.1	-1.64		W07G1.7	-1.91		W06H8.1	-1.44		C34G6.1	-1.62		H19M22.2	-1.66		B0001.4
				miR-2	1.97	22	47	69	326			F13E6.5			ZK662.3			K11E4.4						F59G1.3	-1.76		B0495.5			Y106G6E.6	-1.74		Y106G6E.6	-1.74		T04C10.2	-1.39		B0412.4	-1.48		C39F7.4	-1.55		T23F11.3	-1.34		B0261.2
				miR-791	1.91	5	12	17	76			F23B12.4						C18C4.5						F36D4.5	1.75		F26E4.3			Y92H12A.2	-1.53		Y92H12A.2	-1.53		C09D1.1	-1.55		R13A1.2	-1.73		C42D8.8	-1.46		ZC101.2	-1.53		C05B10.1
				miR-83	1.91	4	12	16	57			F32A7.4						C41G7.4						T10B10.8	1.55		T21B6.3			F25G6.3	-1.37		F25G6.3	-1.37		F14F3.1	-1.55		F09B9.2	-1.47		C43E11.6	-1.65		B0348.6	2.97		C07A9.3
				miR-46	1.78	5	3	8	50			F35C12.1						C56G2.15						C08G9.2	3.19		C02B10.3			W07A8.3	-1.7		W07A8.3	-1.7		ZK669.1	1.45		C04C11.2	-1.5		K10D2.6	-1.52		F58A4.10	1.5		C13G3.3
				miR-244	1.72	4	8	12	35			F44C4.2						F13B9.6						F13H8.5	1.99		C44C10.9			C01H6.5	-1.61		C01H6.5	-1.61		F25B3.3	2.16		C06G1.4	-1.45		F10F2.1	-1.48		Y39A1C.4	1.58		C18A11.7
				miR-242	1.69	0	3	3	20			F58E10.1						F19H6.2						M60.4	1.39		F08F1.3			Y18D10A.6	-1.53		Y18D10A.6	-1.53		F53F4.6	2.18		C34B4.2	-1.49		F10G7.2	-1.53		Y73B6BL.6	1.68		CC8.2
				miR-90	1.64	7	13	20	105			K02B2.1						M01A10.3						Y48G1BL.5	1.63		R08C7.3			H39E23.1	-1.78		H39E23.1	-1.78		T09F3.2	1.59		T07F10.4	-1.48		F15C11.1	-1.43		F52E1.9			D1014.1
				miR-53	1.59	8	6	14	66			M02B1.3						R11F4.3						C33H5.11	2.32		Y97E10C.1			F35B3.5	-1.58		F35B3.5	-1.58		Y48G1BL.5	1.63		Y106G6H.5	-1.69		F18C12.2	-1.64		B0344.2			D1081.2
				miR-239a	1.57	7	6	13	100			M7.8						T07A5.5						T03G6.2	1.7		ZC116.1			W01H2.3	-1.35		W01H2.3	-1.35		ZK863.1	1.65		C16C2.2	-1.56		F25G6.3	-1.37		C01G12.1			F08B12.4
				miR-245	1.56	2	7	9	42			R166.5						Y52B11A.4						C45E5.4			F14F7.1			F10G7.2	-1.53		F10G7.2	-1.53		F11A1.3	4.07		F52D10.3	-1.41		F28F5.3	-1.49		C06E7.2			F13B12.1
				miR-67	1.54	6	16	22	101			ZK1290.9						W02B12.7						E04D5.3			DY3.2			C08B11.9	-1.53		C08B11.9	-1.53		46C5.1			W06F12.1	-1.42		F35B3.5	-1.58		C14F5.5			F13B9.5
				miR-47	1.54	5	3	8	50			T10G3.5						C07A12.4						F57B1.5			C51E3.6			C23F12.1	-1.6		C23F12.1	-1.6		ZK682.2			F49E11.1	-1.37		F35G12.3	-2.01		C23H4.1			F14F3.4
				miR-42	1.51	1	4	5	34			F46F2.2												M01F1.3			F42G8.7			C26G2.2	-1.48		C26G2.2	-1.48		M195.1			C37C3.6	-1.47		F38A5.2	-1.4		C48D5.2			F21D12.5
				miR-231	1.51	3	1	4	26			ZK829.6												M01F1.4			F43B10.2			C27D6.4	-1.31		C27D6.4	-1.31		F12F3.1			ZK1067.6	-1.46		F42H10.5	-1.53		C56C10.13			F21F3.6
				miR-788	1.51	0	2	2	15			R151.5												T24H7.3			T04H1.2			F10F2.1	-1.48		F10F2.1	-1.48		F23H12.6			T23D8.9	-1.82		F49E2.5	-1.67		F01D5.10			F32H2.8
				miR-1022	1.5	unknown targets						F08F1.8												Y70D2A.2			T20B5.2			F38A5.2	-1.4		F38A5.2	-1.4		R05G6.6			C34C12.9	4.75		F56A11.7	-1.72		F07A11.3			F41G3.6
				miR-52	1.5	8	6	14	66			C46C2.1												T01C2.1			C44B12.2			F42H10.5	-1.53		F42H10.5	-1.53		C15C8.1			ZK353.1	2		F59A2.6	-2.19		F08D12.13			F42H10.3
				miR-253	-2.7027	3	2	5	23			ZK1290.8												F46F3.4			C14F5.5			F49E2.5	-1.67		F49E2.5	-1.67		C17E4.6			C48D1.2	2.04		F59G1.3	-1.76		F10G8.8			F45F2.6
				miR-2214	-2.78	unknown targets						F13H6.3												Y38C1BA.3			F42G4.3			F56A11.7	-1.72		F56A11.7	-1.72		C18E3.9			M60.4	1.39		H24G06.1	-1.57		F14D12.2			F46C8.5
												R02E4.2												H06A10.2						H24G06.1	-1.57		H24G06.1	-1.57		C24B9.3			T04F3.2	1.67		H39E23.1	-1.78		F28F9.1			F52E1.13
												Y110A7A.9												F54B11.2						T12A2.2	-1.83		T12A2.2	-1.83		C26E1.3			ZK930.2	1.51		K09B11.9	-1.62		F40F11.2			F54A5.1
																								K02B9.4						T16G1.9	-1.33		T16G1.9	-1.33		C35A5.7			ZK742.5	1.63		R08E3.3	-1.44		F41G4.2			F54D1.6
																								Y110A2AL.8						T24H7.2	-1.52		T24H7.2	-1.52		C35D10.12			C34B2.10	2.14		T12A2.2	-1.83		F42H10.3			F58H10.1
																								B0222.5						C42D8.8	-1.46		C42D8.8	-1.46		C50H2.10			C50H2.13	1.37		T13H5.1	-1.64		F53B3.5			K02B2.4
																								C01G12.1						Y41C4A.4	-1.55		Y41C4A.4	-1.55		F11D5.3			T24C12.2	1.53		T16G1.9	-1.33		F53G12.1			K02B9.4
																								C11E4.1						C25F6.2	-1.39		C25F6.2	-1.39		F35D2.3			T01B10.1	1.67		T24H7.2	-1.52		F54F2.1			R02F11.3
																								C18C4.5						C07A12.1	-1.41		C07A12.1	-1.41		F45E1.7			T05G5.10	1.74		W01H2.3	-1.35		F58D5.9			R07B7.16
																								C44B7.3						C43E11.6	-1.65		C43E11.6	-1.65		F46B6.7			T06D10.1			W06H8.1	-1.44		K02B12.3			R08C7.12
																								C54E4.4						C39F7.4	-1.55		C39F7.4	-1.55		F57B1.7			F59A3.4			W07A8.3	-1.7		K06H7.9			R11A5.2
																								F25G6.7						W06H8.1	-1.44		W06H8.1	-1.44		M04G12.4			R10H10.6			Y106G6E.6	-1.74		K08B12.5			R11B5.1
																								F59B10.4						F18C12.2	-1.64		F18C12.2	-1.64		T01B6.3			Y54F10AM.10			Y116A8C.16	-1.93		K08F11.5			R12H7.5
																								K02B2.3						Y116A8C.16	-1.93		Y116A8C.16	-1.93		T04F8.2			F22D3.2			Y18D10A.6	-1.53		K11G12.2			T01B7.7
																								K11D12.5						F35G12.3	-2.01		F35G12.3	-2.01		T21H8.5			M02B1.2			Y39A3CL.2	-2.16		R06F6.8			T01H3.1
																								M01B12.4						F15C11.1	-1.43		F15C11.1	-1.43		Y45G5AM.6			C42D8.1			Y41C4A.4	-1.55		R07B1.9			T21H8.1
																								R07A4.2						Y39A3CL.2	-2.16		Y39A3CL.2	-2.16		Y62E10A.13			F36G3.3			Y48G8AL.1	-1.54		R13A5.1			T28B11.1
																								R10F2.1						F59G1.3	-1.76		F59G1.3	-1.76		Y71A12B.12			R04B3.2			Y75B8A.6	-1.7		T07D1.3			VC5.2
																								T04C12.7						K10D2.6	-1.52		K10D2.6	-1.52		ZK54.1			Y69E1A.7			Y92H12A.2	-1.53		T21C9.1			W08D2.5
																								T13H5.6						C08G9.1	1.85		C08G9.1	1.85		F07C3.7			F33A8.3			C08G9.1	1.85		W01C9.1			Y34B4A.10
																								T14G10.3						ZK930.2	1.51		ZK930.2	1.51		Y48B6A.8			F31E3.5			C09F12.1	1.52		W01C9.3			Y46H3B.1
																								T19B10.5						R07B7.1	1.56		R07B7.1	1.56		C23H4.1			B0252.3			C09G12.8	2.07		W01F3.1			Y71F9B.5
																								T20F7.6						Y45F3A.2	1.49		Y45F3A.2	1.49		F58G6.6			C09F9.3			C40H5.2	5.49		W03G11.1
																								W06A7.2						C40H5.2	5.49		C40H5.2	5.49		F56A11.3			C10C6.6			C43G2.2	3.04		Y17G7A.1
																								ZC373.4						C43G2.2	3.04		C43G2.2	3.04		W02B8.5			C18A3.2			C53B4.7	1.45		ZK1058.2
																								Y39D8C.1						C53B4.7	1.45		C53B4.7	1.45		F45B8.4			C27A7.5			D1053.4	1.48		ZK1248.14
																								F59F4.4						D1053.4	1.48		D1053.4	1.48		F40F8.7			C33H5.19			F08F8.8	1.4		ZK792.8
																								Y116A8C.12						F22A3.1	2.94		F22A3.1	2.94		D2089.4			C56G2.15			F22A3.1	2.94		ZK973.3
																								B0464.4						H03E18.2	1.64		H03E18.2	1.64		T10H9.2			F13E9.1			F26E4.2	2.45		ZK994.3
																								F15B9.7						H34C03.2	1.57		H34C03.2	1.57		ZC518.2			F13H10.5			F28D1.11	2.93
																								D2024.3						C09G12.8	2.07		C09G12.8	2.07		tag-188			F14B8.4			F36D4.5	1.75
																								K01B6.1						F08F8.8	1.4		F08F8.8	1.4		C07A9.3			F22F7.7			H03E18.2	1.64
																								F59G1.7						F26E4.2	2.45		F26E4.2	2.45		C16D9.6			F23F12.3			H34C03.2	1.57
																								K02G10.6						F28D1.11	2.93		F28D1.11	2.93		C18B12.3			F33G12.5			R06C1.4	3.67
																								K10B3.9						F36D4.5	1.75		F36D4.5	1.75		C49F8.3			F35A5.5			R07B7.1	1.56
																								K08E5.3						R06C1.4	3.67		R06C1.4	3.67		C54E4.5			F35G12.2			R09E10.5	3.01
																								C08F8.8						R09E10.5	3.01		R09E10.5	3.01		C55A6.12			F37C12.7			T05G5.10	1.74
																								T23H4.2						Y45F3A.4	7.23		Y45F3A.4	7.23		E04D5.3			F42G4.5			Y45F3A.2	1.49
																								B0334.11						Y54G9A.9	1.58		Y54G9A.9	1.58		F09B12.1			F42H10.6			Y45F3A.4	7.23
																								F21C10.8						C09F12.1	1.52		C09F12.1	1.52		F41C3.4			F56C9.8			Y54G9A.9	1.58
																								Y42H9B.2						T05G5.10	1.74		T05G5.10	1.74		F55E10.7			F56D12.6			ZK930.2	1.51
																								R03G5.2						T09F3.1			T09F3.1			K11H3.1			F57C9.1			B0035.14
																								H21P03.3						R06F6.8			R06F6.8			M02B1.3			F58H1.4			B0302.1
																								B0464.5						R12B2.5			R12B2.5			M03E7.2			K04G2.2			B0310.2
																								DY3.7						Y45G5AM.9			Y45G5AM.9			M03F8.6			K06A4.2			C01B10.7
																								T24F1.1						C10C6.6			C10C6.6			R186.3			K07H8.2			C01B7.4
																								Y17G7B.7						C14B9.2			C14B9.2			T01D3.3			K08E4.6			C01C4.1
																								C53D6.2						C25H3.8			C25H3.8			T04A6.1			K08F4.3			C01F1.4
																								F35H10.4						C29E4.5			C29E4.5			T08H10.1			K09H11.5			C01G10.11
																								F28F9.1						C35C5.10			C35C5.10			T13G4.3			M01A8.1			C04A11.4
																								C14H10.1						C53B4.3			C53B4.3			T19C4.5			M01H9.1			C05B5.7
																								C27F2.5						F10G8.8			F10G8.8			W02B8.1			R05H11.2			C05E11.8
																								F11A10.5						F15G9.5			F15G9.5			Y47D3B.11			R10A10.1			C06A6.4
																								F14B8.5						F31E3.2			F31E3.2			Y47D3B.4			R17.3			C06A6.5
																								F32D8.2						F37B12.3			F37B12.3			Y54F10AR.1			T06E4.9			C06H2.5
																								F45E1.1						F46F11.9			F46F11.9			ZC449.3			T08H10.1			C07A12.3
																								F54C9.11						F58B4.6			F58B4.6			C42D8.5			T09B9.4			C10C6.6
																								F55E10.7						K01A12.3			K01A12.3			C05E11.4			T23G11.5			C10E2.3
																								H19N07.4						K04A8.6			K04A8.6			F11G11.10			T24H10.4			C10F3.6
																								K08E4.3						K11H3.3			K11H3.3			R13H8.1			VW02B12L.4			C10G8.8
																								K11G12.5						T23F11.1			T23F11.1			K02D7.4			W02B12.11			C13F10.4
																								M176.11						W01F3.1			W01F3.1			T22B7.1			W03G1.5			C14A4.11
																								PAR2.4						Y47D9A.1			Y47D9A.1			F59G1.7			W08F4.3			C14B9.2
																								R08A2.7						Y47G6A.18			Y47G6A.18			K03E6.1			W09D10.1			C15C8.4
																								T04A8.7						ZC518.1			ZC518.1			R12B2.5			Y39A1A.7			C16C2.3
																								Y71F9B.8						ZK682.2			ZK682.2			C10G8.5			Y45F10A.6			C17H12.14
																								ZK632.4						C04A11.4			C04A11.4			F13H10.2			ZK632.7			C18C4.5
																								ZK40.1						Y105E8A.9			Y105E8A.9			ZK1290.4			ZK970.2			C18E9.10
																								F46C8.5						M01B12.3			M01B12.3			F32B6.1			M79.1			C18H9.7
																								T14G10.2						W09C2.1			W09C2.1			K10C3.6			F56D12.1			C25B8.6
																								K02E10.8						B0302.1			B0302.1			F25D7.3			F01F1.6			C25H3.5
																								D1022.1						R160.7			R160.7			R08D7.6			C05E11.5			C25H3.8
																								C35B8.2						F32B6.1			F32B6.1			R03G5.2			T20B5.1			C26H9A.1
																														Y102E9.1			Y102E9.1			F55B12.3			ZC404.9			C28D4.1
																														D2089.4			D2089.4			W09D12.3			ZK688.8			C28D4.2
																														F36H1.2			F36H1.2			F26E4.1			B0024.12			C28D4.9
																														B0310.2			B0310.2			B0545.1			T05E11.5			C28F5.2
																														C06A6.4			C06A6.4						K02B2.4			C29E4.5
																														C06H2.5			C06H2.5						F53A2.8			C30B5.2
																														C10G8.8			C10G8.8						ZC168.1			C30B5.7
																														C13F10.4			C13F10.4						T01B10.4			C30H7.2
																														C14A4.11			C14A4.11						ZK455.7			C33H5.9
																														C18C4.5			C18C4.5						T25G12.4			C34B7.2
																														C25H3.5			C25H3.5						Y22F5A.3			C34D4.4
																														C30H7.2			C30H7.2						B0545.1			C34G6.4
																														C34B7.2			C34B7.2						T19B4.7			C35A11.1
																														C34D4.4			C34D4.4						B0001.4			C35C5.10
																														C44B7.7			C44B7.7						B0218.2			C36E6.2
																														C46F11.6			C46F11.6						B0403.3			C43E11.11
																														C48E7.6			C48E7.6						C03A3.3			C43E11.8
																														C54G4.5			C54G4.5						C09D4.1			C44B7.7
																														D1007.16			D1007.16						C10E2.6			C46F11.6
																														D2023.4			D2023.4						C14F11.1			C48B4.3
																														D2023.6			D2023.6						C15C8.4			C48E7.6
																														F07A11.2			F07A11.2						C33F10.8			C50F4.14
																														F09E8.2			F09E8.2						C34D4.4			C52B9.9
																														F11A10.4			F11A10.4						C35C5.10			C53B4.3
																														F17A9.3			F17A9.3						D1007.5			C53B7.7
																														F18A11.3			F18A11.3						D2024.5			C53C11.3
																														F23H11.9			F23H11.9						E04D5.1			C54G4.5
																														F26A3.1			F26A3.1						F09B9.4			C56G2.7
																														F28B4.2			F28B4.2						F13D11.4			D1007.16
																														F32B6.8			F32B6.8						F48C1.5			D2023.4
																														F38A5.1			F38A5.1						F54A5.1			D2023.6
																														F43E2.3			F43E2.3						F55C12.1			D2089.4
																														F44E7.9			F44E7.9						F59F3.4			E01A2.1
																														F49E8.6			F49E8.6						K05F1.10			E01A2.6
																														F53B1.4			F53B1.4						M60.6			F29G9.4
																														F54D1.6			F54D1.6						R06F6.7			F01G12.6
																														F56D12.6			F56D12.6						R08A2.7			F02E9.1
																														F59A3.4			F59A3.4						R11A8.5			F07A11.2
																														F59B8.2			F59B8.2						R11B5.1			F07F6.4
																														F59G1.1			F59G1.1						R13.2			F08B1.1
																														K02B12.7			K02B12.7						T19C3.4			F09E8.2
																														K03A1.2			K03A1.2						W02B12.9			F10G8.5
																														M05B5.2			M05B5.2						Y105E8A.11			F10G8.8
																														M110.3			M110.3						Y18D10A.18			F11A10.4
																														PAR2.4			PAR2.4						Y34B4A.10			F13B9.5
																														R04F11.1			R04F11.1						Y57E12B.3			F15G9.5
																														R07H5.8			R07H5.8						ZC328.3			F16B3.1
																														R144.4			R144.4						ZK154.6			F17A9.3
																														T03F1.1			T03F1.1						Y71F9AR.1			F17E5.1
																														T05G5.5			T05G5.5						D2024.6			F18A1.2
																														T19A6.1			T19A6.1						M106.5			F18A11.3
																														T21C9.3			T21C9.3						K01C8.10			F20B6.4
																														T24D8.1			T24D8.1						C15C8.2			F20B6.8
																														W01C9.5			W01C9.5						E04F6.11			F23F12.8
																														W02D9.2			W02D9.2						ZC373.6			F23H11.9
																														W07G4.3			W07G4.3						K01B6.1			F23H12.3
																														W09D10.1			W09D10.1						C06E1.4			F25B5.1
																														Y105E8B.4			Y105E8B.4						F08B6.2			F26A3.1
																														Y110A2AR.3			Y110A2AR.3						C30G7.1			F26H9.6
																														Y38F1A.2			Y38F1A.2						C37H5.8			F28B4.2
																														Y40B10A.9			Y40B10A.9						C46H11.4			F29B9.8
																														Y44E3A.4			Y44E3A.4						C49H3.5			F29G9.3
																														Y50E8A.7			Y50E8A.7						M88.6			F31C3.1
																														Y54E10A.16			Y54E10A.16						K09A9.2			F31E3.2
																														Y54E10BR.2			Y54E10BR.2						D1037.4			F32B6.1
																														Y71F9AL.9			Y71F9AL.9						C27B7.8			F32B6.8
																														ZK512.5			ZK512.5						F12F6.5			F33G12.5
																														ZK637.3			ZK637.3						ZK54.2			F36H1.2
																														ZK682.7			ZK682.7						Y94H6A.6			F37B12.3
																														ZK816.1			ZK816.1						C53D6.2			F37D6.6
																														T22H6.7			T22H6.7						Y54E10A.9			F38A5.1
																														T05A6.1			T05A6.1									F39B2.10
																														K07A9.2			K07A9.2									F41H10.11
																														F57B9.4			F57B9.4									F42C5.9
																														F31C3.1			F31C3.1									F43C1.2
																														B0035.14			B0035.14									F43E2.3
																														F39B2.10			F39B2.10									F44E7.9
																														C10F3.6			C10F3.6									F45E6.4
																														T22H6.6			T22H6.6									F46A9.6
																														K02A11.1			K02A11.1									F46E10.8
																														ZK682.4			ZK682.4									F46F11.5
																														F20B6.8			F20B6.8									F46F11.9
																														F54G8.3			F54G8.3									F46F2.2
																														F18A1.2			F18A1.2									F49C12.13
																														C52B9.9			C52B9.9									F49E8.6
																														F46A9.6			F46A9.6									F53B1.4
																														F43C1.2			F43C1.2									F53C11.8
																														T24A11.1			T24A11.1									F53F10.4
																														F10G8.5			F10G8.5									F53F4.3
																														ZC168.1			ZC168.1									F54C9.2
																														C28D4.1			C28D4.1									F54D1.6
																														C25B8.6			C25B8.6									F54E7.3
																														C28D4.9			C28D4.9									F54G8.3
																														C07A12.3			C07A12.3									F55A11.2
																														K10C3.6			K10C3.6									F55C12.1
																														Y51A2D.17			Y51A2D.17									F56C9.8
																														F54E7.3			F54E7.3									F56D12.6
																														VF11C1L.1			VF11C1L.1									F57B9.4
																														K11D12.2			K11D12.2									F57F5.5
																														C53C11.3			C53C11.3									F57H12.1
																														T14G10.2			T14G10.2									F58B4.6
																														F26H9.6			F26H9.6									F59A3.4
																														Y106G6H.7			Y106G6H.7									F59B8.2
																														R03G5.2			R03G5.2									F59G1.1
																														R12A1.2			R12A1.2									K01A12.3
																														T06C10.2			T06C10.2									K02A11.1
																														F54C9.2			F54C9.2									K02B12.7
																														F55A11.2			F55A11.2									K02C4.2
																														C01B7.4			C01B7.4									K02D7.4
																														F37D6.6			F37D6.6									K03A1.2
																														M01E5.5			M01E5.5									K04A8.6
																														F46E10.8			F46E10.8									K04G2.6
																														F53F10.4			F53F10.4									K07A12.1
																														K07E3.8			K07E3.8									K07A9.2
																														C26H9A.1			C26H9A.1									K07E3.8
																														ZK970.4			ZK970.4									K09A9.2
																														T20D3.7			T20D3.7									K10B2.1
																														C01B10.7			C01B10.7									K10C3.6
																														C01F1.4			C01F1.4									K11D12.2
																														C06A6.5			C06A6.5									K11H3.3
																														C15C8.4			C15C8.4									M01A10.3
																														C18E9.10			C18E9.10									M01B12.3
																														C28F5.2			C28F5.2									M01E5.5
																														C30B5.2			C30B5.2									M02B1.3
																														C30B5.7			C30B5.7									M05B5.2
																														C33H5.9			C33H5.9									M110.3
																														C35A11.1			C35A11.1									M18.8
																														C36E6.2			C36E6.2									PAR2.4
																														C43E11.11			C43E11.11									R01B10.5
																														C43E11.8			C43E11.8									R03G5.2
																														C48B4.3			C48B4.3									R04B5.4
																														C50F4.14			C50F4.14									R04F11.1
																														C53B7.7			C53B7.7									R05D3.7
																														C56G2.7			C56G2.7									R06F6.8
																														E01A2.1			E01A2.1									R07H5.2
																														E01A2.6			E01A2.6									R07H5.8
																														F01G12.6			F01G12.6									R08C7.2
																														F02E9.1			F02E9.1									R12A1.2
																														F07F6.4			F07F6.4									R12B2.5
																														F20B6.4			F20B6.4									R13A5.1
																														F23F12.8			F23F12.8									R144.4
																														F23H12.3			F23H12.3									R160.7
																														F25B5.1			F25B5.1									T02C5.3
																														F29B9.8			F29B9.8									T03F1.1
																														F33G12.5			F33G12.5									T05A6.1
																														F41H10.11			F41H10.11									T05B11.3
																														F42C5.9			F42C5.9									T05E11.3
																														F45E6.4			F45E6.4									T05G5.5
																														F53C11.8			F53C11.8									T06C10.2
																														F53F4.3			F53F4.3									T07A5.5
																														F55C12.1			F55C12.1									T09B4.1
																														F56C9.8			F56C9.8									T09F3.1
																														K02C4.2			K02C4.2									T10G3.5
																														K04G2.6			K04G2.6									T14F9.4
																														K07A12.1			K07A12.1									T14G10.2
																														M01A10.3			M01A10.3									T19A6.1
																														M02B1.3			M02B1.3									T20D3.7
																														M18.8			M18.8									T20F7.6
																														R01B10.5			R01B10.5									T21C9.3
																														R07H5.2			R07H5.2									T22H6.1
																														R08C7.2			R08C7.2									T22H6.6
																														T05E11.3			T05E11.3									T22H6.7
																														T07A5.5			T07A5.5									T23F11.1
																														T09B4.1			T09B4.1									T24A11.1
																														T20F7.6			T20F7.6									T24D8.1
																														T22H6.1			T22H6.1									T25G12.4
																														T27F2.2			T27F2.2									T25G12.7
																														VF13D12L.3			VF13D12L.3									T27F2.2
																														W02B8.3			W02B8.3									T28F2.3
																														W02D3.1			W02D3.1									F13G11.1
																														Y113G7A.5			Y113G7A.5									VF11C1L.1
																														Y32H12A.5			Y32H12A.5									VF13D12L.3
																														Y32H12A.8			Y32H12A.8									W01C9.5
																														Y42G9A.4			Y42G9A.4									W01F3.1
																														Y42H9AR.3			Y42H9AR.3									W02B8.3
																														Y45F10A.6			Y45F10A.6									W02D3.1
																														Y54E10BR.1			Y54E10BR.1									W02D9.2
																														Y57E12AM.1			Y57E12AM.1									W07G4.3
																														Y71F9AL.17			Y71F9AL.17									W09C2.1
																														ZC168.2			ZC168.2									W09D10.1
																														ZK1073.2			ZK1073.2									Y102E9.1
																														ZK121.2			ZK121.2									Y105E8A.9
																														F29G9.3			F29G9.3									Y105E8B.4
																														F57H12.1			F57H12.1									Y106G6H.7
																														T28F2.3			T28F2.3									Y110A2AR.3
																														ZC518.3			ZC518.3									Y113G7A.5
																														C28D4.2			C28D4.2									Y16B4A.1
																														T05B11.3			T05B11.3									Y32H12A.5
																														R13A5.1			R13A5.1									Y32H12A.8
																														T25G12.7			T25G12.7									Y38F1A.2
																														K02D7.4			K02D7.4									Y39E4B.12
																														T10G3.5			T10G3.5									Y40B10A.9
																														F16B3.1			F16B3.1									Y42G9A.4
																														F29G9.4			F29G9.4									Y42H9AR.3
																														C05E11.8			C05E11.8									Y44E3A.4
																														Y39E4B.12			Y39E4B.12									Y45F10A.6
																														C10E2.3			C10E2.3									Y45G5AM.9
																														T02C5.3			T02C5.3									Y47D9A.1
																														F46F2.2			F46F2.2									Y47G6A.18
																														F13B9.5			F13B9.5									Y49A3A.2
																														F17E5.1			F17E5.1									Y50E8A.7
																														K10B2.1			K10B2.1									Y51A2D.17
																														R04B5.4			R04B5.4									Y54E10A.16
																														C01C4.1			C01C4.1									Y54E10BR.1
																														C16C2.3			C16C2.3									Y54E10BR.2
																														T14F9.4			T14F9.4									Y57E12AM.1
																														C34G6.4			C34G6.4									Y65B4BR.4
																														F57F5.5			F57F5.5									Y71F9AL.17
																														K09A9.2			K09A9.2									Y71F9AL.9
																														T25G12.4			T25G12.4									ZC168.1
																														C05B5.7			C05B5.7									ZC168.2
																														C18H9.7			C18H9.7									ZC518.1
																														F13G11.1			F13G11.1									ZC518.3
																														ZK470.5			ZK470.5									ZK1073.2
																														ZK757.3			ZK757.3									ZK121.2
																														R05D3.7			R05D3.7									ZK470.5
																														Y16B4A.1			Y16B4A.1									ZK512.5
																														C01G10.11			C01G10.11									ZK546.1
																														F46F11.5			F46F11.5									ZK637.3
																														Y49A3A.2			Y49A3A.2									ZK682.2
																														F49C12.13			F49C12.13									ZK682.4
																														C17H12.14			C17H12.14									ZK682.7
																														F08B1.1			F08B1.1									ZK757.3
																														Y65B4BR.4			Y65B4BR.4									ZK816.1
																														ZK546.1			ZK546.1									ZK970.4
