# Supplementary material for: Effects of ADARs on small RNA processing pathways in C. elegans
Source: HighWire-hosted journal article supplement (doi:10.1101/gr.134841.111), 2012-06-06
Supplement: S_Table3.xlsx [file S_Table3.xlsx]

## Sheet: miRNA editing
				wt								adr-1								adr-2								adr-1;adr-2
miRNA	Chromosome	Genomic Position		A	G	C	T	# of Reads	Editing %	p-value		A	G	C	T	# of Reads	Editing %	p-value		A	G	C	T	# of Reads	Editing %	p-value		A	G	C	T	# of Reads	Editing %	p-value
miR-800	chrX	380944		21	7	0	0	28	25	0.00031		660	77	0	0	737	10.4	0		818	0	0	0	818	0	1		128	0	0	0	128	0	1

## Sheet: piRNA editing
					wt								adr-1								adr-2								adr-1;adr-2
piRNA	Chromosome	Strand	Genomic Position		A	G	C	T	# of Reads	% Editing	p-value		A	G	C	T	# of Reads	% Editing	p-value		A	G	C	T	# of Reads	% Editing	p-value		A	G	C	T	# of Reads	% Editing	p-value
21UR-13730	chrIV	Minus	16559067		20	4	0	0	24	16.6667	0.00898094		50	0	1	0	51	0	0.543817		39	0	1	0	40	0	0.543971		20	1	0	0	21	4.7619	0.281476
21UR-12014	chrIV	Plus	5495651		5	4	0	0	9	44.4444	0.00898094		6	0	0	0	6	0	1		25	0	0	0	25	0	1		21	0	0	0	21	0	1
21UR-3636	chrIV	Plus	13886146		6	4	0	0	10	40	0.00898094		20	0	0	0	20	0	1		22	0	0	0	22	0	0.577619		27	0	0	0	27	0	0.753197
21UR-2043	chrIV	Minus	14287816		15	5	0	0	20	25	0.0039122		7	0	0	0	7	0	1		9	0	0	0	9	0	1		13	0	0	0	13	0	1
21UR-2043	chrIV	Minus	14287814		13	6	0	0	19	31.5789	0.00127605		7	0	0	0	7	0	1		9	0	0	0	9	0	1		12	0	0	0	12	0	1
21UR-9923	chrIV	Plus	15725676		10	6	0	0	16	37.5	0.00073602		12	0	0	0	12	0	1		16	0	0	0	16	0	1		21	0	0	0	21	0	1
21UR-963	chrIV	Plus	15896594		10	11	0	0	21	52.381	3.66982e-06		22	0	0	0	22	0	1		19	0	0	0	19	0	0.577619		29	1	0	0	30	3.33333	0.281476
21UR-4723	chrIV	Plus	15237408		47	20	0	0	67	29.8507	1.75707e-10		74	0	0	0	74	0	1		68	1	0	0	69	1.44928	0.281476		95	1	0	0	96	1.04167	0.281476
21UR-3215	chrIV	Plus	15536993		558	55	0	0	614	8.95765	0		993	0	0	0	993	0	0.753197		1131	1	0	0	1132	0.0883392	0.271782		983	1	0	0	984	0.101626	0.447006

## Sheet: sense endo-siRNA editing
					wt								adr-1								adr-2								adr-1;adr-2
Endo-siRNA Locus	Chromosome	Strand	Genomic Position		A	G	C	T	# of Reads	% Editing	p-value		A	G	C	T	# of Reads	% Editing	p-value		A	G	C	T	# of Reads	% Editing	p-value		A	G	C	T	# of Reads	% Editing	p-value
C31E10.8	chrX	Minus	14008981		7	5	0	0	12	41.6667	0.00344206		36	0	0	0	36	0	1		32	1	0	0	33	3.0303	0.470957		27	1	0	0	29	3.44828	0.173036
C31E10.8	chrX	Minus	14008984		5	5	0	0	11	45.4545	0.00216943		35	0	0	0	35	0	0.753204		32	0	0	0	32	0	0.753197		27	1	0	0	28	3.57143	0.173036
C31E10.8	chrX	Minus	14008974		8	4	0	0	12	33.3333	0.0117206		36	0	0	0	36	0	0.577619		32	0	0	0	32	0	1		28	1	0	0	29	3.44828	0.281476
F43E2.6	chrII	Minus	7367543		2221	1050	0	0	3272	32.0905	0		8629	10982	0	0	19611	55.9992	0		11772	108	0	0	11880	0.909091	0		9295	100	0	0	9395	1.0644	0
F43E2.6	chrII	Minus	7367540		2362	905	0	0	3268	27.6928	0		10089	9519	0	0	19607	48.549	0		11806	71	0	0	11877	0.597794	0		9299	91	0	0	9390	0.969116	0
F43E2.6	chrII	Minus	7367537		3203	61	0	0	3264	1.86887	0		18567	990	0	0	19557	5.06213	0		11865	5	0	0	11870	0.042123	0.00291879		9361	11	0	0	9372	0.117371	3.67016e-06
F43E2.6	chrII	Minus	7367552		736	53	0	0	789	6.71736	0		2901	190	0	0	3090	6.14887	0		2216	2	0	0	2218	0.0901713	0.087349		1663	0	0	0	1663	0	0.99965
F56F4.5	chrI	Plus	6135838		9	125	0	0	134	93.2836	0		21	1	0	0	22	4.54545	0.271782		24	1	0	0	24	4.16667	0.447006		18	0	0	0	18	0	0.577619
T01G1.4	chrIV	Minus	11360178		5	5	0	0	10	50	0.00495021		3	0	0	0	3	0	1		6	0	0	0	6	0	0.753197		12	0	0	0	12	0	0.753197
Y105E8A.21	chrI	Minus	14509625		13	7	0	0	19	36.8421	0.00050093		525	6	0	0	531	1.12994	0.00113599		262	1	0	0	263	0.380228	0.366158		18	0	0	0	19	0	0.577619
Y105E8A.21	chrI	Minus	14509633		15	4	0	0	18	22.2222	0.0115309		527	4	0	0	531	0.753296	0.011247		262	0	0	0	263	0	0.57759		18	0	0	0	19	0	0.577612
Y105E8A.21	chrI	Minus	14509622		15	4	0	0	19	21.0526	0.00575016		525	3	0	0	529	0.567108	0.0195192		259	1	1	0	261	0.383142	0.773065		18	0	0	0	19	0	0.577612
Y105E8A.21	chrI	Minus	14509631		15	4	0	0	19	21.0526	0.00914134		528	3	0	0	531	0.564972	0.0285776		262	1	0	0	263	0.380228	0.447006		19	0	0	0	19	0	0.753197
Y18D10A.13	chrI	Plus	12882957		10	6	0	0	16	37.5	0.00110356		19	1	0	0	20	5	0.281476		38	0	0	0	38	0	1		45	1	0	0	46	2.17391	0.281476
Y46G5A.31	chrII	Minus	12867865		9	33	0	0	42	78.5714	1.11022e-16		9	1	0	0	10	10	0.223846		12	1	0	0	14	7.14286	0.220447		9	1	0	0	10	10	0.447006
Y46G5A.31	chrII	Minus	12867870		9	33	0	0	42	78.5714	1.11022e-16		9	1	0	0	10	10	0.223846		13	0	0	0	13	0	1		9	1	0	0	10	10	0.447006
Y46G5A.31	chrII	Minus	12867875		10	30	0	0	39	76.9231	4.10783e-15		9	1	0	0	10	10	0.347881		13	0	0	0	13	0	1		9	1	0	0	10	10	0.313084
Y46G5A.31	chrII	Minus	12867863		8	7	0	0	16	43.75	0.000227508		8	1	0	0	9	11.1111	0.470957		12	0	0	0	12	0	1		9	0	0	0	9	0	1
Y54G2A.2	chrIV	Plus	2791926		12	5	0	0	17	29.4118	0.00167332		4	0	0	0	4	0	0.517521		68	0	0	0	68	0	0.577612		66	0	0	0	66	0	0.999985
Y54G2A.2	chrIV	Plus	2791929		12	4	0	0	16	25	0.00512785		4	0	0	0	4	0	1		68	0	0	0	68	0	1		66	0	0	0	66	0	1
Y60A3A.13	chrV	Minus	19893762		15	16	0	0	31	51.6129	9.71039e-09		92	3	0	0	95	3.15789	0.0278389		96	0	0	0	96	0	0.609472		96	0	0	0	96	0	1
Y73B6BL.32	chrIV	Plus	6327857		9	5	0	0	14	35.7143	0.00192928		18	6	0	0	24	25	0.000952965		25	1	0	0	26	3.84615	0.281476		17	0	0	0	17	0	1
Y73B6BL.32	chrIV	Plus	6327860		14	0	0	0	14	0	0.609472		11	13	0	0	24	54.1667	4.01353e-07		26	0	0	0	26	0	1		17	0	0	0	17	0	1
Y97E10AR.4	chrV	Minus	8009319		12	90	0	0	102	88.2353	0		4	0	0	0	4	0	0.577619		16	1	0	0	17	5.88235	0.167182		6	0	0	0	6	0	0.577619

## Sheet: antisense endo-siRNA editing
					wt								adr-1								adr-2								adr-1;adr-2
Endo-siRNA Locus	Chromosome	Strand	Genomic Position		A	G	C	T	# of Reads	% Editing	p-value		A	G	C	T	# of Reads	% Editing	p-value		A	G	C	T	# of Reads	% Editing	p-value		A	G	C	T	# of Reads	% Editing	p-value
AC3.10	chrV	Minus	10384391		4	36	0	0	40	90	0		3	1	0	0	4	25	0.39		11	0	0	0	11	0	0.61		5	0	0	0	6	0	0.61
C04C3.3	chrIV	Minus	3402000		9	11	0	0	19	57.9	5.7e-06		11	3	0	0	14	21.4	0.028		16	0	0	0	16	0	1		17	0	0	0	17	0	1
C04C3.3	chrIV	Minus	3401999		9	10	0	0	19	52.6	8.6e-06		11	3	0	0	14	21.4	0.028		16	0	0	0	16	0	1		17	0	0	0	17	0	0.58
C43E11.8	chrI	Plus	4247567		4	8	0	0	11	72.7	0.00013		4	1	0	0	5	20	0.28		9	0	0	0	9	0	0.75		12	0	0	0	13	0	0.58
C43E11.8	chrI	Plus	4247571		4	4	0	0	8	50	0.009		5	0	0	0	5	0	1		9	0	0	0	9	0	1		11	0	0	0	11	0	0.75
C47G2.3	chrII	Plus	11288747		12	4	0	0	16	25	0.009		14	0	0	0	14	0	1		6	0	0	0	6	0	1		10	0	0	0	10	0	1
E01G4.3	chrII	Plus	13461843		2	4	0	0	6	66.7	0.01		2	0	0	0	2	0	1		7	0	0	0	7	0	1		11	0	0	0	11	0	0.75
F02D10.7	chrX	Minus	13447831		6	0	0	0	6	0	1		13	6	0	0	19	31.6	0.00095		11	1	0	0	12	8.3	0.28		9	0	0	0	9	0	1
F15B9.4	chrV	Minus	13006800		8	0	0	0	8	0	1		28	6	0	0	34	17.6	0.00095		10	0	0	0	10	0	1		10	0	0	0	10	0	1
F31E3.1	chrIII	Minus	6980830		66	13	0	0	79	16.5	4e-07		66	0	0	0	66	0	1		72	0	0	0	72	0	1		50	0	0	0	50	0	1
F43E2.6	chrII	Plus	7367545		418	43	0	0	461	9.3	0		2895	190	0	0	3085	6.2	0		3081	11	0	0	3092	0.4	3.7e-06		2056	8	0	0	2064	0.4	0.0001
F52C12.4	chrIV	Minus	1936694		47	4	0	0	51	7.8	0.009		46	1	0	0	47	2.1	0.28		39	0	0	0	39	0	0.61		55	0	0	0	55	0	1
M03A1.1	chrII	Minus	4580623		2	7	0	0	9	77.8	0.00034		13	0	0	0	14	0	0.52		9	1	0	0	10	10	0.45		4	0	0	0	4	0	0.58
M163.3	chrX	Minus	14490842		60	4	0	0	64	6.3	0.009		62	2	0	0	64	3.1	0.087		24	0	0	0	24	0	1		48	0	0	0	48	0	1
T07A9.5	chrIV	Plus	418676		4	4	0	0	8	50	0.0079		5	0	0	0	6	0	0.58		9	1	0	0	10	10	0.35		9	0	0	0	10	0	0.75
W02D9.4	chrI	Plus	12538392		5	11	0	0	16	68.8	3.8e-06		2	0	0	0	3	0	0.52		15	0	0	0	15	0	0.75		7	0	0	0	7	0	1
W03F11.4	chrI	Plus	2240977		7	58	0	0	65	89.2	0		12	0	0	0	12	0	1		10	1	0	0	11	9.1	0.28		6	0	0	0	6	0	1
Y116A8A.9	chrIV	Plus	16848089		15	25	0	0	39	64.1	1e-12		727	1	0	0	728	0.1	0.3		404	1	0	0	405	0.2	0.22		25	0	0	0	25	0	1
Y116A8A.9	chrIV	Plus	16848095		15	25	0	0	39	64.1	1e-12		727	1	0	0	728	0.1	0.37		404	1	0	0	405	0.2	0.35		25	0	0	0	25	0	0.75
Y116A8A.9	chrIV	Plus	16848093		15	24	0	0	39	61.5	1.3e-12		726	2	0	0	728	0.3	0.13		404	1	0	0	405	0.2	0.39		25	0	0	0	25	0	1
Y116A8A.9	chrIV	Plus	16848087		15	24	0	0	39	61.5	1.3e-12		721	7	0	0	728	1	0.00026		405	0	0	0	405	0	1		24	0	0	0	25	0	0.58
Y116A8A.9	chrIV	Plus	16848099		15	24	0	0	39	61.5	1.9e-12		728	0	0	0	728	0	0.61		404	0	0	0	405	0	0.58		25	0	0	0	25	0	1
Y116A8A.9	chrIV	Plus	16848086		15	24	0	0	39	61.5	1.9e-12		726	1	0	0	727	0.1	0.47		403	0	0	0	403	0	1		24	0	0	0	24	0	1
Y18D10A.1	chrI	Plus	12788068		4	5	0	0	9	55.6	0.0041		2	1	0	0	4	25	0.18		11	0	0	0	11	0	1		7	0	0	0	7	0	0.75
Y34D9A.10	chrI	Plus	1058581		2	5	0	0	7	71.4	0.005		19	0	0	0	19	0	1		7	0	0	0	7	0	0.75		13	1	0	0	14	7.1	0.26
Y34D9A.10	chrI	Plus	1058584		1	4	0	0	6	66.7	0.0087		17	0	0	0	17	0	1		7	0	0	0	7	0	0.75		13	0	0	0	13	0	1
Y7A5A.9	chrX	Minus	15826709		6	9	0	0	15	60	3.4e-05		10	0	0	0	10	0	1		10	0	0	0	10	0	1		21	0	0	0	21	0	1
ZK546.1	chrII	Minus	4953454		7	5	0	0	12	41.7	0.0023		4	0	0	0	4	0	0.58		8	1	0	0	9	11.1	0.45		10	0	0	0	10	0	0.58
ZK616.7	chrIV	Plus	5408441		11	6	0	0	17	35.3	0.00095		9	0	0	0	9	0	1		12	0	0	0	12	0	1		12	0	0	0	12	0	1
ZK632.5	chrIII	Minus	9810710		10	0	0	0	10	0	1		1	5	0	0	6	83.3	0.0029		17	1	0	0	18	5.6	0.16		11	0	0	0	12	0	0.52

## Sheet: rncs-1 editing
				wt								adr-1								adr-2								adr-1;adr-2
Chromosome	Strand of Read	Genomic Position		A	G	C	T	# of Reads	% Editing	p-value		A	G	C	T	# of Reads	% Editing	p-value		A	G	C	T	# of Reads	% Editing	p-value		A	G	C	T	# of Reads	% Editing	p-value
chrX	Plus	1011583		43	0	0	0	43	0	1		100.001	8.99937	0	0	109	8.2563	3.34e-05		76	0	0	0	76	0	1		77.5	0	0	0	77.5	0	1
chrX	Plus	1011620		21	8	0	0	29	27.5862	0.000101673		75.0002	5.99977	0	0	81	7.40712	0.000946835		20	0	0	0	20	0	1		18	0	0	0	18	0	1
chrX	Plus	1011648		18	8	0	0	26	30.7692	0.00010168		74	0	0	0	74	0	1		44	0	0	0	44	0	1		35	0	0	0	35	0	1
chrX	Plus	1011751		81	7	0	0	88	7.95455	0.000309906		191	0.99999	1.00032e-05	0	192	0.520828	0.281148		94	0	0	0	94	0	1		53	0	0	0	53	0	1
chrX	Plus	1011761		204	11	0	0	215	5.11628	3.62713e-06		951.5	9.99964	0	0	961.5	1.04	1.1e-05		370	0.99996	0	0	371	0.269531	0.281154		245	0	0	0	245	0	1
chrX	Plus	1012090		82	79	0	0	161	49.0683	0		268.335	42.9988	0	0	311.333	13.8112	0		117.693	0	0	0	117.693	0	1		102.093	0	0	0	102.093	0	1
chrX	Plus	1012152		20	6	0	0	26	23.0769	0.000946872		79	2.99996	4.0016e-05	0	82	3.65849	0.0277477		28	0	0	0	28	0	1		17	0.99999	1.0008e-05	0	18	5.5555	0.281148
