# Supplementary material for: Effects of ADARs on small RNA processing pathways in C. elegans
Source: HighWire-hosted journal article supplement (doi:10.1101/gr.134841.111), 2012-06-06
Supplement: S_Table4.xlsx [file S_Table4.xlsx]

## Sheet: adr-1
Gene locus	Chromosome	Strand	Gene chr start position	Gene chr stop position	Normalized # of WT reads	Normalized # of adr-1 reads	Fold change (adr-1 vs wt)	pval	Read Type	Class
H06I04.6	chrIII	-	3061193	3063292	0	19	19	0.00174324	Sense
Y54E10A.3	chrI	+	3229432	3233295	5	80	17.32	5.32e-11	Sense
C18E9.8	chrII	-	8985938	8987940	0	17	17	0.00340205	Sense
Y73B3A.14	chrX	+	119802	121146	5	70	15.15	1.64e-09	Sense
W02F12.3	chrV	+	6703039	6704550	0	15	15	0.00398588	Sense
B0041.4	chrI	-	4645737	4646958	0	14	14	0.00927504	Sense	Inverse
B0432.11	chrII	-	293917	294641	0	14	14	0.00927504	Sense
F27D4.1	chrI	+	7702423	7704566	0	14	14	0.00576089	Sense
F42G9.1	chrIII	+	783708	786069	0	14	14	0.00576089	Sense	Inverse
C06G1.4	chrX	+	16613409	16616164	0	13	13	0.00832635	Sense
C34C6.4	chrII	-	8696527	8698860	0	13	13	0.0129571	Sense
C56C10.6	chrII	-	6579650	6581260	0	13	13	0.00832635	Antisense
F56F3.4	chrIII	+	4468845	4470781	0	13	13	0.00832635	Sense
Y104H12D.4	chrIV	+	1182591	1186604	0	13	13	0.00832635	Sense
Y48A6B.5	chrIII	+	11008924	11010477	0	13	13	0.00832635	Sense
Y57G11C.11	chrIV	-	14793170	14796285	0	13	13	0.0129571	Sense	Inverse
Y82E9BR.3	chrIII	+	1419206	1419626	0	13	13	0.00832635	Sense
Y37D8A.21	chrIII	-	12927936	12931741	12	148	12.81	4.29e-16	Sense
C49H3.11	chrIV	-	7925439	7926354	0	12	12	0.0181009	Sense	Inverse
T08D2.8	chrX	+	194447	197901	2	26	11.26	0.00140831	Antisense
T28F12.3	chrV	-	4517667	4549277	2	26	11.26	0.00140831	Sense
Y82E9BR.1	chrIII	+	1458222	1466722	2	26	11.26	0.000624712	Sense
B0336.3	chrIII	+	5711498	5714738	0	11	11	0.0173934	Sense
C41C4.8	chrII	+	8138440	8141142	0	11	11	0.0173934	Sense
E01A2.1	chrI	+	4139514	4142336	0	11	11	0.0173934	Sense
F37A4.2	chrIII	+	6722493	6723162	0	11	11	0.0173934	Sense
R06C7.4	chrI	+	7244990	7246015	0	11	11	0.0173934	Sense
T01E8.6	chrII	-	10240334	10242411	0	11	11	0.0252866	Sense
T22C1.8	chrI	-	7955980	7958438	0	11	11	0.0252866	Sense
Y44A6D.5	chrV	-	20796611	20798388	0	11	11	0.0252866	Sense
Y50D7A.11	chrIII	+	265095	266592	0	11	11	0.0173934	Sense
ZK1058.2	chrIII	-	3908914	3914115	0	11	11	0.0252866	Sense
ZK809.1	chrIV	+	11642071	11643676	0	11	11	0.0252866	Antisense
T23G5.1	chrIII	-	9225428	9228156	2	25	10.82	0.00190074	Sense
C29H12.2	chrII	+	6123776	6125045	0	10	10	0.0251391	Sense
F42A9.1	chrIV	+	8631414	8643986	0	10	10	0.0251391	Sense
K09F5.2	chrX	+	7727842	7733109	0	10	10	0.0353251	Antisense
M18.7	chrIV	+	12123124	12124779	0	10	10	0.0251391	Sense	Inverse
T10F2.3	chrIII	-	5165619	5169758	0	10	10	0.0353251	Sense
Y71G12B.13	chrI	+	1702123	1707891	0	10	10	0.0251391	Sense	Inverse
Y92H12A.1	chrI	+	1566931	1580204	2	23	9.96	0.00169266	Sense
Y59A8A.3	chrV	-	17846153	17855953	2	22	9.52	0.0046369	Sense
B0495.7	chrII	-	7702174	7705154	0	9	9	0.0493486	Sense
C04F12.9	chrI	-	9710149	9710757	0	9	9	0.0493486	Sense	Inverse
C05D9.1	chrX	+	1129008	1132409	0	9	9	0.0493486	Antisense
C27D9.1	chrII	+	4753442	4755581	0	9	9	0.0363341	Sense	Inverse
C37C3.2	chrV	+	7855197	7857914	0	9	9	0.0363341	Sense
F39H11.3	chrI	+	8702470	8705793	0	9	9	0.0363341	Sense
F43G6.7	chrII	+	11810711	11811571	0	9	9	0.0363341	Sense
F53G12.5	chrI	+	128692	133809	0	9	9	0.0363341	Sense	Inverse
F55A11.3	chrV	+	11767304	11769863	0	9	9	0.0363341	Sense
F56D1.1	chrII	+	5478550	5480270	0	9	9	0.0363341	Sense
H15N14.2	chrI	-	7766531	7772225	0	9	9	0.0493486	Sense
K01A11.4	chrIII	-	3439089	3444175	0	9	9	0.0493486	Sense
K01C8.10	chrII	+	8283599	8285413	0	9	9	0.0363341	Sense
K08E7.1	chrIV	-	12564064	12565951	0	9	9	0.0493486	Sense
R03D7.2	chrII	-	10932709	10935062	0	9	9	0.0493486	Sense
T04H1.2	chrV	-	12242306	12244925	0	9	9	0.0493486	Sense	Inverse
T13H2.5	chrX	-	4596048	4605869	0	9	9	0.0493486	Sense	Inverse
T24E12.11	chrII	-	3778399	3779549	0	9	9	0.0493486	Sense
Y71F9AL.9	chrI	+	2876936	2878038	0	9	9	0.0363341	Sense
ZK632.4	chrIII	-	9805412	9807352	0	9	9	0.0493486	Sense
F59E12.9	chrII	-	5640050	5647014	2	19	8.23	0.0111555	Sense	Inverse
Y69A2AR.19	chrIV	+	2488847	2494133	2	19	8.23	0.00626063	Sense
Y67D8C.10	chrIV	-	3103816	3131366	12	93	8.05	4.54e-09	Sense	Inverse
C16A11.2	chrII	+	4238166	4244823	5	37	8.01	9.54e-05	Sense
C27H6.2	chrV	-	9978765	9980741	5	36	7.79	0.000385562	Sense
C28D4.3	chrIV	-	9739538	9740829	2	18	7.79	0.014892	Sense
F10G7.2	chrII	+	4706831	4709762	2	18	7.79	0.00864188	Sense
K07F5.13	chrIV	+	9858458	9861718	2	18	7.79	0.00864188	Sense
Y106G6D.6	chrI	-	10118069	10122091	2	18	7.79	0.014892	Sense
Y47D3B.9	chrIII	-	11463545	11470686	2	18	7.79	0.014892	Sense
F45H10.1	chrII	-	13487102	13491696	14	102	7.36	9.06e-11	Antisense
Y49E10.11	chrIII	-	12398803	12420544	2	17	7.36	0.0198371	Sense
Y71F9AL.17	chrI	-	2895328	2900861	2	17	7.36	0.0198371	Sense
ZK792.5	chrIV	-	11684943	11688088	2	17	7.36	0.0198371	Sense	Inverse
B0035.7	chrIV	-	11323855	11324441	2	16	6.93	0.0163531	Antisense
B0365.3	chrV	-	13126625	13129967	2	16	6.93	0.0263616	Sense
Y37E11AL.2	chrIV	+	3698507	3699717	2	16	6.93	0.0163531	Sense
ZK430.7	chrII	-	4422616	4424885	5	32	6.93	0.00119107	Sense
ZK829.4	chrIV	+	11953221	11955184	2	16	6.93	0.0163531	Sense
C09B9.6	chrIV	-	5055582	5056039	2	15	6.49	0.0224074	Antisense
C18H7.1	chrIV	+	615543	620931	5	30	6.49	0.000864071	Sense	Inverse
K07H8.6	chrIV	+	8261153	8266348	2	15	6.49	0.0349401	Antisense	Inverse
Y67H2A.1	chrIV	-	13273878	13282846	2	15	6.49	0.0349401	Sense
C03D6.6	chrI	-	9657098	9657819	2	14	6.06	0.046175	Sense
C10C6.3	chrIV	-	11463579	11465160	2	14	6.06	0.046175	Sense
F43G6.9	chrII	-	11774948	11777836	2	14	6.06	0.046175	Sense
Y24D9A.2	chrIV	+	4390845	4393397	2	14	6.06	0.030611	Sense
ZK783.6	chrIII	+	7648715	7649933	2	14	6.06	0.046175	Antisense
C16C8.5	chrII	-	3444722	3445359	2	13	5.63	0.0416773	Antisense
F11A10.1	chrIV	+	12079443	12084330	2	13	5.63	0.0416773	Sense
F13C5.2	chrX	+	593960	596290	2	13	5.63	0.0416773	Sense	Inverse
F37C12.7	chrIII	+	7167766	7170921	2	13	5.63	0.0416773	Sense
F54A3.2	chrII	+	2243655	2247052	2	13	5.63	0.0416773	Sense
Y49A3A.2	chrV	+	14351694	14353896	2	13	5.63	0.0416773	Sense
Y92H12BL.1	chrI	+	1348503	1359596	2	13	5.63	0.0416773	Sense
Y22D7AL.5	chrIII	+	1619738	1625790	9	49	5.3	4.62e-05	Sense	Inverse
Y67H2A.10	chrIV	-	13282969	13289467	14	67	4.83	3.45e-06	Antisense
T11F8.3	chrIV	+	5470015	5473075	7	33	4.76	0.00134639	Sense	Inverse
Y39B6A.2	chrV	+	19190510	19198887	7	33	4.76	0.00134639	Sense	Inverse
M106.4	chrII	-	10863614	10868730	92	433	4.69	5.43e-27	Sense	Inverse
R10F2.1	chrIII	+	2910959	2935547	30	139	4.63	1.47e-09	Antisense	Inverse
ZK354.11	chrIV	-	5312678	5313135	5	21	4.55	0.0128553	Antisense
H06I04.4	chrIII	+	3068324	3069151	152	673	4.41	1e-46	Sense
T05H10.1	chrII	+	8042518	8047379	5	20	4.33	0.0171255	Sense
C29E4.8	chrIII	-	7950185	7951528	5	19	4.11	0.0379025	Sense
F27C1.1	chrI	+	5434809	5435788	5	19	4.11	0.0227362	Sense
Y52D3.1	chrIII	+	10947327	10951051	5	19	4.11	0.0227362	Sense
T22F3.3	chrV	+	3579043	3585036	7	28	4.04	0.00553995	Sense	Inverse
C23G10.1	chrIII	+	6210600	6212771	7	27	3.9	0.0147879	Antisense
H35N09.2	chrX	-	8603463	8606162	30	117	3.9	2.9e-07	Sense	Inverse
K11H3.2	chrIII	+	9846355	9847419	5	18	3.9	0.0300731	Sense
W02G9.3	chrV	+	2671462	2673972	5	18	3.9	0.0300731	Sense
ZK1248.6	chrII	-	5809891	5810310	7	27	3.9	0.0147879	Sense
F10G8.2	chrI	-	10021690	10022752	7	26	3.75	0.00957816	Antisense
F56F3.1	chrIII	-	4471374	4475111	7	26	3.75	0.0187884	Sense	Inverse
T22D1.4	chrIV	+	6910666	6912849	7	26	3.75	0.00957816	Sense
T02G5.4	chrII	+	7082040	7084328	5	17	3.68	0.0396169	Sense
Y47H10A.5	chrI	-	12095785	12097929	28	102	3.68	3.31e-06	Sense	Inverse
Y57G7A.6	chrII	-	1282011	1285591	5	17	3.68	0.0396169	Antisense
Y95B8A.5	chrI	+	897287	905906	5	17	3.68	0.0396169	Sense
F35E2.5	chrI	-	11741604	11743941	7	25	3.61	0.0237988	Sense
Y55D5A.5	chrIII	-	2995752	3028790	7	25	3.61	0.0237988	Sense	Inverse
Y18D10A.17	chrI	+	12904458	12906217	14	49	3.54	0.000482472	Sense	Inverse
M03A1.1	chrII	+	4571987	4590900	46	163	3.53	9.02e-09	Antisense	Inverse
C04C3.3	chrIV	+	3399684	3403682	7	24	3.46	0.0300485	Antisense
F56D12.5	chrII	+	1321040	1323093	9	32	3.46	0.0053839	Sense	Inverse
K08F8.6	chrII	+	8770901	8781948	9	32	3.46	0.0120053	Antisense
Y47D3A.5	chrIII	-	11168804	11170443	7	24	3.46	0.0163543	Antisense
F43D9.5	chrIII	-	10503958	10505111	7	23	3.32	0.0212591	Antisense
ZK520.5	chrIII	+	13692611	13693571	16	53	3.28	0.00167979	Antisense	Inverse
F42G8.11	chrIV	-	8132155	8133673	9	30	3.25	0.0188554	Sense
Y41C4A.18	chrIII	+	11730587	11731161	16	52	3.22	0.000600147	Sense
C47E8.5	chrV	+	14686141	14688403	21	63	3.03	0.00025443	Sense	Inverse
K07F5.5	chrIV	+	9844032	9844245	18	56	3.03	0.00208311	Antisense	Inverse
Y38F2AR.12	chrIV	-	2399557	2412408	76	231	3.03	4.84e-10	Sense	Inverse
C06A5.6	chrI	-	5983231	5985871	12	34	2.94	0.0183265	Sense
C55B7.4	chrI	+	6497439	6499561	12	34	2.94	0.0183265	Antisense
C06G4.4	chrIII	-	7977154	7977730	42	122	2.93	5.98e-07	Antisense
W03C9.8	chrII	+	11948666	11949342	18	54	2.92	0.000912989	Sense
Y111B2A.22	chrIII	+	12714445	12743809	16	47	2.91	0.00204053	Sense	Inverse
F12F6.5	chrIV	+	11570481	11578669	7	20	2.89	0.0455931	Sense
M01E5.5	chrI	+	13292501	13297542	7	20	2.89	0.0455931	Sense
Y54E10A.4	chrI	+	3213118	3217022	14	40	2.89	0.0115987	Antisense
F43E2.6	chrII	-	7367383	7368783	1093	3145	2.88	7.17e-138	Antisense	Inverse
C10H11.9	chrI	-	4738170	4744322	9	26	2.81	0.0447915	Sense
W10C8.5	chrI	-	2854051	2855671	9	26	2.81	0.0244181	Antisense	Inverse
ZK632.9	chrIII	-	9824787	9825343	9	26	2.81	0.0244181	Antisense	Inverse
C34E10.6	chrIII	+	5228386	5230194	12	32	2.77	0.0133456	Sense
B0280.5	chrIII	-	7102011	7103920	23	60	2.6	0.00431319	Sense	Inverse
H19M22.2	chrIII	+	2658072	2681101	9	24	2.6	0.0392608	Sense
K12D12.4	chrII	-	11863440	11865373	16	42	2.6	0.0164166	Sense
F57B9.2	chrIII	+	6946700	6958814	25	65	2.56	0.000843679	Sense	Inverse
F26E4.9	chrI	+	9788998	9789753	14	35	2.53	0.0147284	Sense	Inverse
K09E3.4	chrX	+	17119184	17120179	14	35	2.53	0.0315641	Antisense
F31D4.3	chrV	+	20841567	20842955	9	23	2.49	0.0494616	Sense
Y46E12BL.2	chrII	+	15233054	15244833	9	23	2.49	0.0494616	Sense	Inverse
F43E2.6	chrII	-	7367383	7368783	7614	18918	2.48	0	Sense	Inverse
C50C3.6	chrIII	+	8164302	8172628	16	39	2.41	0.0127475	Sense	Inverse
K05F1.9	chrII	-	5800062	5801121	16	39	2.41	0.0127475	Antisense
T09A5.11	chrII	+	7864437	7865937	16	39	2.41	0.0127475	Sense
C06G4.1	chrIII	+	7987057	7990478	18	44	2.38	0.00887157	Sense
C01A2.5	chrI	+	13384739	13387072	23	53	2.29	0.00535836	Sense
C07D10.5	chrII	+	7381498	7383414	16	37	2.29	0.0418057	Antisense	Inverse
T21G5.3	chrI	+	6854686	6857528	143	326	2.28	1.44e-11	Sense	Inverse
F49E12.4	chrII	+	8405533	8406785	23	52	2.25	0.0185108	Antisense
F36H12.5	chrIV	+	5266854	5267557	14	31	2.24	0.0352096	Sense
Y48G1C.1	chrI	+	93030	94882	25	56	2.2	0.0056542	Sense	Inverse
C09B9.3	chrIV	-	5021177	5028954	46	101	2.19	0.00170204	Sense	Inverse
F31E3.5	chrIII	-	6970074	6971616	49	106	2.19	0.0013283	Sense	Inverse
C38C3.5	chrV	+	1475072	1479582	14	30	2.16	0.0433672	Sense	Inverse
F54C4.1	chrIII	+	87559	89229	21	45	2.16	0.0341027	Antisense
T07A9.11	chrIV	+	385908	386549	25	55	2.16	0.0199325	Antisense
ZK546.3	chrII	+	4938877	4941134	23	50	2.16	0.0260232	Antisense
C50F2.5	chrI	-	3895793	3897402	16	34	2.1	0.0363056	Antisense
ZC190.7	chrV	-	8686115	8686807	32	68	2.1	0.0035499	Antisense
W01B6.4	chrIV	+	10075431	10075623	25	53	2.09	0.0276782	Antisense
H02I12.1	chrIV	+	11372961	11377571	32	64	1.98	0.00752604	Sense	Inverse
F44E2.2	chrIII	+	8853709	8861292	675	1328	1.97	7.77e-32	Sense	Inverse
T20B12.1	chrIII	+	7386153	7391061	51	99	1.95	0.00120162	Sense
F32A11.3	chrII	-	13151366	13153294	92	178	1.93	2.16e-05	Antisense
Y34D9A.4	chrI	-	1030634	1033438	32	62	1.92	0.031661	Sense	Inverse
H27M09.3	chrI	+	6847509	6849922	46	88	1.9	0.00280738	Sense	Inverse
F59C12.4	chrX	-	16602361	16602634	39	74	1.88	0.0227018	Sense	Inverse
T01C3.7	chrV	-	15000743	15001944	37	68	1.84	0.0336232	Sense
T05H4.11	chrV	-	6424234	6425935	32	59	1.82	0.0182567	Antisense
B0365.1	chrV	+	13116482	13120115	44	79	1.8	0.0274728	Antisense
F41F3.6	chrV	-	4658939	4662486	44	79	1.8	0.00774741	Antisense
T09A5.10	chrII	+	7860589	7863356	44	79	1.8	0.00774741	Sense	Inverse
C53A5.2	chrV	-	14519530	14523155	256	459	1.79	5.91e-07	Sense
C56C10.8	chrII	-	6587915	6588589	39	70	1.78	0.0128465	Antisense	Inverse
C47E8.11	chrV	+	14688614	14688898	28	49	1.77	0.0365533	Sense
Y43F8A.2	chrV	+	19371531	19376179	210	372	1.77	9.62e-06	Antisense
Y39B6A.37	chrV	+	18990821	18993763	53	92	1.73	0.0258981	Antisense
K02B2.5	chrIV	-	5947117	5947584	42	71	1.71	0.0175306	Antisense	Inverse
C16C10.11	chrIII	+	4152029	4152658	53	88	1.66	0.0421408	Antisense	Inverse
C47E8.11	chrV	+	14688614	14688898	284	472	1.66	9.83e-06	Antisense
F13B10.2	chrIII	+	3867829	3869524	42	69	1.66	0.0238968	Sense	Inverse
T27F6.4	chrI	+	12484169	12486450	203	336	1.65	0.00019697	Antisense	Inverse
C16C2.4	chrI	-	9712813	9715220	32	53	1.64	0.0484253	Antisense	Inverse
ZK546.13	chrII	-	4942111	4943928	97	159	1.64	0.0095791	Sense	Inverse
F52G2.2	chrIV	-	13521936	13539561	49	79	1.63	0.0192507	Antisense	Inverse
E03H12.7	chrIV	-	4987746	4988587	55	89	1.61	0.0155014	Antisense
ZK185.2	chrIV	+	4536545	4541764	49	77	1.59	0.0257395	Sense	Inverse
Y38C1AA.7	chrIV	+	158966	159830	621	976	1.57	2.68e-08	Antisense	Inverse
Y47H10A.5	chrI	-	12095785	12097929	633	943	1.49	6.9e-11	Antisense	Inverse
K07F5.11	chrIV	+	9852526	9853531	261	386	1.48	0.0020853	Antisense
T27F7.3	chrII	-	4990816	4993566	55	82	1.48	0.0402295	Antisense
Y82E9BR.20	chrIII	+	1374141	1376532	658	977	1.48	1.54e-06	Antisense	Inverse
F56F4.5	chrI	+	6133244	6137981	1587	2330	1.47	4.81e-23	Sense
F54A3.1	chrII	+	2249407	2253961	164	239	1.46	0.0168317	Antisense	Inverse
F55A12.7	chrI	-	5342182	5344727	74	108	1.46	0.0235269	Antisense	Inverse
T12E12.3	chrIV	+	5541619	5544720	109	159	1.46	0.00684332	Sense	Inverse
F55A11.3	chrV	+	11767304	11769863	113	163	1.44	0.048765	Antisense
Y110A7A.13	chrI	-	5103633	5104915	76	110	1.44	0.0256372	Antisense
Y48G1C.7	chrI	-	96474	100613	162	233	1.44	0.00180219	Antisense	Inverse
F44E2.2	chrIII	+	8853709	8861292	146	204	1.4	0.0446692	Antisense	Inverse
F31E3.5	chrIII	-	6970074	6971616	136	187	1.37	0.0109541	Antisense	Inverse
ZK185.2	chrIV	+	4536545	4541764	210	287	1.37	0.0331795	Antisense	Inverse
B0393.4	chrIII	-	4759727	4763573	571	774	1.36	1.7e-06	Antisense
T22B11.5	chrIV	-	4696907	4704002	155	209	1.35	0.00997638	Antisense	Inverse
ZK484.5	chrI	-	6087370	6087766	815	1097	1.35	3.01e-08	Antisense	Inverse
K08D12.1	chrIV	-	1708801	1709743	247	332	1.34	0.00172384	Antisense	Inverse
T23G11.3	chrI	+	7695675	7698222	270	361	1.34	0.0301261	Antisense	Inverse
C30G12.7	chrII	-	7296092	7298187	293	386	1.32	0.00146473	Antisense
C07G1.4	chrIV	-	8188887	8198932	104	136	1.31	0.0471147	Antisense	Inverse
T04A8.14	chrIII	-	4715256	4720629	286	375	1.31	0.00195393	Antisense
T05B11.3	chrV	-	7733602	7734892	383	499	1.3	0.000515367	Antisense
T25G12.11	chrX	-	17236816	17237770	878	1139	1.3	3.62e-07	Antisense	Inverse
C49H3.11	chrIV	-	7925439	7926354	187	242	1.29	0.013757	Antisense	Inverse
F01G4.6	chrIV	-	11146911	11149478	166	215	1.29	0.0194342	Antisense
F56D12.5	chrII	+	1321040	1323093	524	664	1.27	0.0271836	Antisense	Inverse
ZC412.5	chrV	-	14874175	14875406	513	647	1.26	0.000365751	Antisense
C08H9.2	chrII	-	9886467	9891003	169	209	1.24	0.0404959	Antisense	Inverse
Y38A10A.5	chrV	-	6099154	6100492	538	658	1.22	0.00127508	Antisense
B0414.3	chrI	+	5774587	5775613	206	170	-1.20482	0.0214596	Antisense
C38C3.5	chrV	+	1475072	1479582	208	172	-1.20482	0.0210382	Antisense	Direct
F18C5.2	chrII	+	6554925	6559210	143	119	-1.20482	0.0504604	Antisense
F20D12.1	chrIV	+	7957562	7962104	1035	860	-1.20482	2.48e-06	Antisense	Direct
F31A9.2	chrX	+	1794811	1795669	270	224	-1.20482	0.0102187	Antisense	Direct
F37H8.2	chrII	-	11171665	11175402	261	216	-1.20482	0.0110364	Sense	Direct
F46F11.2	chrI	+	5619604	5620498	351	290	-1.20482	0.00359915	Antisense	Direct
K08D12.3	chrIV	+	1710255	1711126	490	406	-1.20482	0.000823417	Antisense
Y111B2A.3	chrIII	+	12496423	12498902	1381	1140	-1.20482	3.14e-08	Antisense	Direct
Y46G5A.1	chrII	+	12694319	12725391	187	155	-1.20482	0.0278274	Antisense
ZK637.8	chrIII	+	8905524	8911657	266	221	-1.20482	0.0116891	Antisense	Direct
C06G4.1	chrIII	+	7987057	7990478	374	308	-1.21951	0.00247207	Antisense
C34F11.3	chrII	+	5203302	5209777	305	251	-1.21951	0.00575058	Antisense
C50F2.2	chrI	+	3881829	3888315	298	244	-1.21951	0.00551005	Antisense	Direct
F53F10.2	chrI	+	3830940	3834121	139	114	-1.21951	0.0474376	Antisense
F59A3.2	chrI	+	5512050	5516028	219	181	-1.21951	0.0172611	Antisense
T04C9.1	chrIII	+	5993176	6006290	249	204	-1.21951	0.00995442	Antisense	Direct
Y18D10A.13	chrI	+	12878583	12902770	231	190	-1.21951	0.0141762	Antisense	Direct
Y41E3.10	chrIV	+	15037291	15039473	249	205	-1.21951	0.0110069	Antisense
Y48E1B.13	chrII	+	13601111	13604965	358	295	-1.21951	0.00309424	Antisense	Direct
Y48G1C.1	chrI	+	93030	94882	596	491	-1.21951	0.000188861	Antisense	Direct
Y4C6B.1	chrIV	+	5354476	5356531	194	160	-1.21951	0.0236987	Antisense
Y59A8B.6	chrV	+	18022451	18042190	182	149	-1.21951	0.0235952	Antisense	Direct
Y60A3A.27	chrV	+	19957891	19959845	166	136	-1.21951	0.0300857	Antisense
ZK402.3	chrX	+	1402212	1402856	268	220	-1.21951	0.00856438	Antisense	Direct
B0391.10	chrV	+	15585669	15592963	217	175	-1.23457	0.0116304	Antisense
C16A11.4	chrII	+	4227039	4229126	802	646	-1.23457	4.53e-06	Antisense	Direct
C27D9.1	chrII	+	4753442	4755581	252	204	-1.23457	0.00795657	Antisense	Direct
C38C10.5	chrIII	+	9394046	9404330	196	160	-1.23457	0.018919	Antisense
F01G4.4	chrIV	+	11143316	11145895	550	445	-1.23457	0.00014998	Antisense	Direct
F18A11.2	chrII	+	13032760	13036331	169	137	-1.23457	0.0265237	Antisense	Direct
F25H2.10	chrI	+	10567922	10568952	139	112	-1.23457	0.0381822	Antisense	Direct
F44A2.1	chrV	+	9323183	9327182	356	287	-1.23457	0.00173421	Antisense	Direct
T23H2.1	chrI	+	6447333	6453944	236	192	-1.23457	0.0111399	Antisense
W02B12.3	chrII	+	11453895	11455723	321	260	-1.23457	0.00307029	Antisense	Direct
Y46E12BL.2	chrII	+	15233054	15244833	268	218	-1.23457	0.00699995	Antisense	Direct
Y71G12B.3	chrI	+	1812955	1813538	464	378	-1.23457	0.000566032	Antisense
Y73B6BL.5	chrIV	+	6329577	6333540	247	200	-1.23457	0.00825204	Antisense	Direct
ZK1067.3	chrII	+	9223189	9225099	256	208	-1.23457	0.00767118	Antisense
F22D3.2	chrII	+	6928706	6947823	208	167	-1.25	0.0125099	Antisense
F39E9.6	chrII	-	3310282	3311925	247	198	-1.25	0.00666997	Sense	Direct
F43G6.3	chrII	+	11783124	11783982	127	102	-1.25	0.0421423	Antisense
F44D12.8	chrIV	+	10023308	10025198	129	104	-1.25	0.0413209	Antisense	Direct
F48E8.5	chrIII	+	5450697	5452719	139	111	-1.25	0.0341106	Antisense
K11H3.4	chrIII	+	9832832	9838209	132	105	-1.25	0.0361238	Antisense
T01G9.5	chrI	+	8294870	8296902	182	146	-1.25	0.0170615	Antisense
W04A8.7	chrI	+	13861462	13887425	127	102	-1.25	0.0421423	Antisense
Y37E11B.2	chrIV	+	3578559	3579137	1102	880	-1.25	4.16e-08	Antisense	Direct
Y45G12B.2	chrV	+	2694766	2698837	171	136	-1.25	0.0186818	Antisense
C14A4.4	chrII	+	10587963	10592574	116	91	-1.26582	0.0412162	Antisense
F08H9.1	chrV	+	14457452	14459875	125	99	-1.26582	0.0382391	Antisense
F09G2.2	chrV	+	7196896	7198417	351	278	-1.26582	0.00105493	Antisense	Direct
F39E9.1	chrII	+	3315878	3320354	259	205	-1.26582	0.0475358	Sense	Direct
F44B9.3	chrIII	+	8010706	8013642	845	664	-1.26582	4.23e-07	Antisense	Direct
F53F10.4	chrI	+	3824948	3826516	116	91	-1.26582	0.0412162	Antisense
K01G5.5	chrIII	+	10748323	10749810	243	191	-1.26582	0.00494711	Antisense
T12E12.4	chrIV	+	5538476	5541352	233	184	-1.26582	0.00592225	Antisense	Direct
T21B10.7	chrII	+	8927664	8929403	120	95	-1.26582	0.0397056	Antisense
W04B5.1	chrIII	+	2428211	2429351	467	368	-1.26582	0.000160495	Antisense	Direct
Y116A8C.36	chrIV	+	17119639	17126194	404	321	-1.26582	0.000525325	Antisense	Direct
Y17D7C.1	chrV	+	18707975	18711609	612	482	-1.26582	1.66e-05	Antisense
Y38H6C.5	chrV	+	20501026	20505395	714	562	-1.26582	3.6e-06	Antisense	Direct
Y45G12B.1	chrV	+	2698970	2707023	136	107	-1.26582	0.0274701	Antisense	Direct
Y46G5A.4	chrII	-	12726866	12736783	113	89	-1.26582	0.0419876	Sense	Direct
Y53G8AR.2	chrIII	+	3322958	3331655	132	104	-1.26582	0.0321107	Antisense
C04A2.3	chrII	+	6834958	6847844	157	123	-1.28205	0.0184688	Antisense	Direct
F18E2.3	chrV	+	12763923	12767905	217	170	-1.28205	0.00664367	Antisense	Direct
F37C12.7	chrIII	+	7167766	7170921	240	187	-1.28205	0.00398696	Antisense
F39E9.7	chrII	-	3306026	3307113	776	607	-1.28205	9.09e-07	Sense	Direct
F57C9.5	chrI	+	4827072	4829769	356	279	-1.28205	0.000732787	Antisense	Direct
K05C4.7	chrI	+	14737689	14738722	164	128	-1.28205	0.0155683	Antisense	Direct
R31.2	chrV	+	11917540	11924629	240	188	-1.28205	0.00448173	Antisense	Direct
T09A5.11	chrII	+	7864437	7865937	748	583	-1.28205	1.08e-06	Antisense
T19H12.2	chrV	+	4890414	4891408	534	417	-1.28205	3.84e-05	Antisense	Direct
T23F6.4	chrIV	+	12724959	12729943	99	77	-1.28205	0.0468209	Antisense
W04B5.2	chrIII	+	2424342	2427460	1224	961	-1.28205	1.37e-09	Antisense	Direct
Y38C9A.1	chrV	+	107401	118162	307	240	-1.28205	0.00142457	Antisense	Direct
Y39A3CL.7	chrIII	+	1824907	1876744	229	178	-1.28205	0.00484997	Antisense	Direct
Y54E2A.6	chrII	+	14772891	14778039	127	99	-1.28205	0.0294619	Sense
Y54G11A.14	chrII	+	14318059	14320819	686	537	-1.28205	3.86e-06	Antisense	Direct
Y69E1A.8	chrIV	+	10966559	10968081	386	299	-1.28205	0.000303962	Antisense
ZK675.1	chrII	+	7893159	7900415	194	151	-1.28205	0.00878336	Antisense
B0205.7	chrI	+	10734010	10736598	155	119	-1.2987	0.0146745	Antisense
C24H12.4	chrII	+	411220	416617	111	85	-1.2987	0.0331394	Antisense
C26C6.1	chrI	+	7495432	7503573	217	168	-1.2987	0.00523869	Antisense	Direct
F08G5.1	chrIV	+	12408862	12410437	92	71	-1.2987	0.0493442	Antisense
F22B5.2	chrII	+	8442701	8444170	164	127	-1.2987	0.0137808	Antisense	Direct
F52D2.6	chrX	+	1974907	1980932	550	425	-1.2987	1.76e-05	Antisense	Direct
F54A3.3	chrII	+	2233540	2243540	176	136	-1.2987	0.0112579	Antisense	Direct
F54D11.2	chrV	+	4617932	4627566	347	267	-1.2987	0.000489782	Antisense	Direct
H19N07.2	chrV	+	11113890	11118739	210	162	-1.2987	0.00548098	Antisense
K11D2.3	chrI	+	12508437	12513394	92	71	-1.2987	0.0493442	Antisense
R13H8.1	chrI	+	10750620	10776665	386	297	-1.2987	0.000240465	Antisense	Direct
T19B4.2	chrI	+	5692268	5696691	229	177	-1.2987	0.0043047	Antisense	Direct
Y45F10D.3	chrIV	+	13778833	13782329	180	139	-1.2987	0.00964961	Antisense
Y55F3BR.2	chrIV	+	858929	874529	155	119	-1.2987	0.0146745	Antisense	Direct
Y57G11C.9	chrIV	+	14787128	14790730	129	99	-1.2987	0.022478	Antisense
ZK177.6	chrII	+	5501605	5503879	134	103	-1.2987	0.0217832	Antisense
C18G1.4	chrV	+	4755970	4758569	658	500	-1.31579	1.02e-06	Antisense	Direct
C28C12.2	chrIV	+	8499300	8500063	753	574	-1.31579	2.35e-07	Antisense	Direct
F26D10.3	chrIV	+	17278918	17281140	430	328	-1.31579	8.07e-05	Antisense	Direct
F40F9.1	chrV	+	9705328	9707818	210	159	-1.31579	0.00376042	Antisense
F44G4.4	chrII	+	8997745	8999640	111	84	-1.31579	0.0290021	Antisense	Direct
F57B9.2	chrIII	+	6946700	6958814	344	263	-1.31579	0.000390491	Antisense	Direct
K02E2.6	chrV	+	20376056	20376797	178	135	-1.31579	0.049664	Sense	Direct
K04D7.5	chrIV	+	10197790	10202962	120	91	-1.31579	0.023882	Antisense
K12D12.1	chrII	+	11875072	11880504	869	658	-1.31579	1.89e-08	Antisense	Direct
T12A2.2	chrIII	+	6248590	6251188	164	125	-1.31579	0.0107127	Antisense
T12D8.1	chrIII	+	13643797	13656517	534	404	-1.31579	8.38e-06	Antisense	Direct
T12E12.1	chrIV	+	5551120	5558808	95	72	-1.31579	0.0424096	Antisense
T21E12.4	chrI	+	4386787	4401981	912	689	-1.31579	6.51e-09	Antisense	Direct
T23B12.4	chrV	+	8462304	8465549	146	110	-1.31579	0.0136746	Antisense
W03G9.2	chrI	+	4962452	4964239	155	118	-1.31579	0.0129154	Antisense
W06D4.6	chrI	+	9065078	9070256	109	83	-1.31579	0.0336784	Antisense
Y116A8B.1	chrIV	+	17216255	17217324	748	571	-1.31579	2.72e-07	Antisense	Direct
Y48G1A.4	chrI	+	323860	330986	136	104	-1.31579	0.0188502	Antisense	Direct
Y73B6BL.6	chrIV	+	6324193	6326388	256	196	-1.31579	0.00196731	Antisense	Direct
Y77E11A.3	chrIV	+	1446402	1448315	1056	806	-1.31579	1.35e-09	Antisense	Direct
C06G3.2	chrIV	+	7040194	7043678	742	557	-1.33333	1.07e-07	Antisense	Direct
C16A3.1	chrIII	+	6390887	6393617	169	126	-1.33333	0.0070225	Antisense
C32F10.2	chrI	+	5807711	5815640	136	102	-1.33333	0.0144317	Antisense	Direct
C38D9.2	chrV	+	17566405	17571570	485	362	-1.33333	1.06e-05	Antisense	Direct
D1081.7	chrI	+	8487612	8490933	626	471	-1.33333	1.06e-06	Antisense	Direct
E04D5.1	chrII	+	10416706	10419158	146	109	-1.33333	0.0119564	Antisense
F09E8.3	chrIV	+	13155196	13164025	185	138	-1.33333	0.00492664	Antisense	Direct
F13D12.5	chrII	+	11726732	11728347	649	484	-1.33333	3.94e-07	Antisense	Direct
F15B9.4	chrV	+	13002321	13006969	1633	1222	-1.33333	3.14e-15	Antisense	Direct
F29G9.2	chrV	+	6018976	6026320	88	66	-1.33333	0.0444366	Antisense	Direct
F53F8.6	chrV	+	20704115	20705182	176	132	-1.33333	0.00676234	Antisense	Direct
F55A11.2	chrV	+	11764881	11767198	118	88	-1.33333	0.0211228	Antisense
T10B5.6	chrV	+	1869213	1870556	448	337	-1.33333	3.09e-05	Antisense	Direct
T28D9.4	chrII	+	6475641	6478024	136	102	-1.33333	0.0144317	Antisense
W04A4.5	chrI	+	13663471	13674949	120	90	-1.33333	0.0208423	Antisense	Direct
Y49E10.17	chrIII	+	12436431	12440936	571	426	-1.33333	2.01e-06	Antisense	Direct
Y55F3BL.1	chrIV	+	800817	806153	129	97	-1.33333	0.0172157	Antisense
Y65B4BR.4	chrI	+	537124	542202	494	372	-1.33333	1.31e-05	Antisense	Direct
Y73B6BL.2	chrIV	+	6419490	6420883	118	88	-1.33333	0.0211228	Antisense
Y73B6BL.38	chrIV	+	6421587	6423481	286	216	-1.33333	0.000782002	Antisense	Direct
C14C10.5	chrV	+	12600263	12607283	240	177	-1.35135	0.00111733	Antisense	Direct
C26E6.4	chrIII	+	4939528	4944366	356	262	-1.35135	9.02e-05	Antisense
C27A2.1	chrII	+	5062121	5067086	109	80	-1.35135	0.0222123	Antisense	Direct
C39E9.12	chrIV	+	13093979	13095348	298	221	-1.35135	0.000385232	Antisense	Direct
E01A2.2	chrI	+	4132500	4135240	97	72	-1.35135	0.0315706	Antisense
F01G4.1	chrIV	+	11125995	11131140	213	158	-1.35135	0.00250214	Antisense
F20D12.2	chrIV	+	7948656	7953531	185	137	-1.35135	0.00430166	Antisense	Direct
F25H2.11	chrI	+	10569122	10569923	150	111	-1.35135	0.00885672	Antisense
F28H1.3	chrI	+	3983206	3986386	910	677	-1.35135	1.9e-09	Antisense	Direct
F33H1.4	chrII	+	10174569	10180048	303	223	-1.35135	0.000288744	Antisense
F38B7.5	chrV	+	11554779	11558101	476	351	-1.35135	7.49e-06	Antisense	Direct
F40F11.2	chrIV	+	11594294	11601648	273	203	-1.35135	0.000736755	Antisense
F54C9.8	chrII	+	8575471	8577653	157	117	-1.35135	0.0085509	Antisense
F54D5.8	chrII	+	11545616	11547282	187	138	-1.35135	0.00370754	Antisense
F58D5.3	chrI	+	12069795	12072868	169	124	-1.35135	0.00533033	Antisense	Direct
H05L14.2	chrI	+	7981587	7993131	171	127	-1.35135	0.00605673	Antisense	Direct
K03B4.3	chrV	+	4687094	4688776	85	63	-1.35135	0.0389904	Antisense
R06C7.1	chrI	+	7235381	7238787	256	191	-1.35135	0.00103747	Antisense	Direct
R144.4	chrIII	+	5018610	5021093	254	187	-1.35135	0.000800879	Antisense	Direct
T01C3.9	chrV	+	15005087	15006374	122	90	-1.35135	0.0155229	Antisense	Direct
T28A8.5	chrIII	+	13501509	13503338	113	84	-1.35135	0.0216755	Antisense	Direct
Y48A6B.11	chrIII	+	11063410	11068635	210	155	-1.35135	0.00220731	Antisense
Y51H1A.4	chrII	+	13875939	13882483	180	133	-1.35135	0.00439699	Antisense	Direct
Y55F3AM.3	chrIV	+	1012651	1019687	166	123	-1.35135	0.00619598	Antisense
Y57A10A.1	chrII	+	12133449	12147049	173	129	-1.35135	0.00598621	Antisense	Direct
Y57G11C.8	chrIV	+	14781797	14783251	340	252	-1.35135	0.000164721	Antisense
Y67D8C.5	chrIV	-	3032725	3049968	453	337	-1.35135	1.81e-05	Sense	Direct
Y71G12B.9	chrI	+	1755329	1766401	166	123	-1.35135	0.00619598	Antisense	Direct
ZK381.1	chrIV	+	6977502	6978927	249	185	-1.35135	0.00107203	Antisense
C05D2.5	chrIII	+	5604413	5607403	280	204	-1.36986	0.000363049	Antisense	Direct
C15A11.2	chrI	+	7387353	7388713	270	196	-1.36986	0.000375254	Antisense
C34G6.3	chrI	+	5896654	5897386	148	108	-1.36986	0.00776525	Antisense
E01G4.7	chrII	+	13478065	13478835	1213	885	-1.36986	5.27e-13	Antisense	Direct
F28C6.6	chrII	+	8603791	8606476	189	139	-1.36986	0.00319215	Antisense
F39B2.10	chrI	+	14757065	14758419	113	83	-1.36986	0.018767	Antisense
F45D11.10	chrII	+	988742	991080	99	73	-1.36986	0.0269529	Antisense	Direct
F55A3.1	chrI	+	10799611	10806890	136	99	-1.36986	0.00942634	Antisense
F56D1.4	chrII	+	5466337	5473773	122	89	-1.36986	0.0134111	Antisense
F57C9.2	chrI	+	4844908	4847917	173	126	-1.36986	0.0039319	Antisense
H16D19.4	chrI	-	12640726	12644416	166	121	-1.36986	0.00466737	Sense	Direct
H20J04.4	chrII	+	4329016	4334479	104	76	-1.36986	0.0227265	Antisense
K10H10.1	chrII	+	14489704	14492778	95	69	-1.36986	0.0275729	Antisense
M01D7.7	chrI	+	1835679	1841192	185	135	-1.36986	0.0265234	Sense
M01E11.2	chrI	+	5579668	5581797	76	56	-1.36986	0.0476791	Antisense
M01E11.3	chrI	+	5573245	5576745	173	127	-1.36986	0.00453572	Antisense	Direct
M04B2.1	chrIV	+	11524612	11527927	878	645	-1.36986	1.29e-09	Antisense	Direct
R03D7.1	chrII	+	10926482	10930997	79	57	-1.36986	0.0404211	Antisense
R06C7.8	chrI	+	7251938	7255223	748	544	-1.36986	8.76e-09	Antisense	Direct
R10E12.1	chrIII	+	9957253	9963025	111	81	-1.36986	0.0189726	Antisense
T01E8.5	chrII	-	10242522	10247559	102	74	-1.36986	0.0229727	Sense	Direct
T11F9.18	chrV	+	11485834	11488231	395	290	-1.36986	3.44e-05	Antisense	Direct
Y37H2A.1	chrV	+	18108234	18114699	132	96	-1.36986	0.0111286	Antisense
Y48E1B.12	chrII	+	13596863	13597782	125	91	-1.36986	0.0132783	Antisense
Y54F10AL.1	chrIII	+	2487756	2494248	74	54	-1.36986	0.048284	Antisense
D2005.5	chrI	+	7820836	7826373	173	124	-1.38889	0.00292985	Antisense
D2030.8	chrI	+	7591293	7595193	134	97	-1.38889	0.00951305	Antisense	Direct
E02H9.6	chrIII	-	2436092	2442316	111	80	-1.38889	0.0163321	Sense	Direct
F11A10.7	chrIV	+	12085393	12086650	76	55	-1.38889	0.0408598	Antisense
F11G11.7	chrII	+	4852043	4857789	111	80	-1.38889	0.0163321	Antisense
F25B5.4	chrIII	+	5940192	5943700	259	186	-1.38889	0.0003893	Antisense
F26F12.7	chrV	+	5826843	5832677	432	311	-1.38889	6.64e-06	Antisense	Direct
F55B12.3	chrV	+	13819338	13822959	120	87	-1.38889	0.0135395	Antisense
F59E12.2	chrII	+	5649745	5654199	113	81	-1.38889	0.0138927	Antisense
K08D12.2	chrIV	+	1711276	1714177	247	178	-1.38889	0.000538553	Antisense	Direct
R09B3.4	chrI	+	11911313	11912036	143	103	-1.38889	0.00682298	Antisense	Direct
T05F1.2	chrI	+	9622538	9624881	134	97	-1.38889	0.00951305	Antisense
T07C4.10	chrIII	+	10320949	10325546	462	334	-1.38889	3.99e-06	Antisense	Direct
T14G10.5	chrIV	+	10151919	10155608	259	186	-1.38889	0.0003893	Antisense
T21B10.3	chrII	+	8934301	8938953	268	192	-1.38889	0.000283457	Antisense
W07G4.4	chrV	+	13043691	13046335	120	86	-1.38889	0.0116336	Antisense	Direct
Y105C5B.18	chrIV	+	15964601	15965641	132	95	-1.38889	0.00959663	Antisense
Y111B2A.22	chrIII	+	12714445	12743809	192	139	-1.38889	0.0023794	Antisense	Direct
Y39A1B.3	chrIII	+	10763028	10777225	129	93	-1.38889	0.00967676	Antisense	Direct
Y71D11A.1	chrIII	+	1152031	1180880	328	237	-1.38889	8.69e-05	Antisense	Direct
B0303.9	chrIII	+	8700835	8703213	81	57	-1.40845	0.0291037	Antisense	Direct
C07H6.4	chrIII	+	7499632	7503163	76	54	-1.40845	0.0347975	Antisense
C27F2.1	chrIII	+	4987231	4991359	79	56	-1.40845	0.034514	Antisense	Direct
C46C2.3	chrIV	+	9225692	9227759	388	277	-1.40845	1.32e-05	Antisense	Direct
D2023.6	chrV	+	11827301	11829334	65	46	-1.40845	0.0504256	Antisense
F21G4.2	chrX	+	9884256	9889638	573	408	-1.40845	1.32e-07	Antisense	Direct
K02E2.6	chrV	+	20376056	20376797	1206	862	-1.40845	5.22e-14	Antisense	Direct
K11C4.3	chrV	+	6881325	6891385	171	122	-1.40845	0.0226736	Sense	Direct
R07E5.3	chrIII	+	4404756	4406256	125	89	-1.40845	0.00982516	Antisense
T05E11.3	chrIV	+	11119422	11122910	99	71	-1.40845	0.0198912	Antisense	Direct
T07D4.4	chrII	+	8884829	8889590	219	156	-1.40845	0.000780237	Antisense	Direct
T27C10.3	chrI	+	10889989	10892032	65	46	-1.40845	0.0504256	Antisense	Direct
W03F9.10	chrV	+	128236	131739	79	56	-1.40845	0.034514	Antisense	Direct
Y119D3B.11	chrIII	+	1208119	1213639	125	89	-1.40845	0.00982516	Antisense
Y45G5AM.2	chrV	+	4175872	4181646	631	448	-1.40845	2.76e-08	Antisense	Direct
Y54E2A.11	chrII	+	14795311	14798345	293	208	-1.40845	0.000109991	Antisense	Direct
Y65B4BL.2	chrI	+	506479	509059	1049	745	-1.40845	1.07e-12	Antisense	Direct
Y6E2A.9	chrV	+	15726840	15727880	342	244	-1.40845	4.07e-05	Antisense
C14A4.3	chrII	+	10584265	10587850	169	118	-1.42857	0.00217551	Antisense
C17E4.6	chrI	+	9422547	9431104	171	120	-1.42857	0.0021673	Antisense
C34C12.1	chrIII	+	3454329	3455835	74	52	-1.42857	0.0350519	Antisense	Direct
D2005.4	chrI	+	7815261	7820231	559	394	-1.42857	1.01e-07	Antisense	Direct
F22B7.5	chrIII	+	8631072	8633436	76	53	-1.42857	0.0294435	Antisense
F28C6.2	chrII	+	8594279	8596037	247	172	-1.42857	0.000217687	Antisense	Direct
F31C3.2	chrI	+	15036359	15040474	233	163	-1.42857	0.000353586	Antisense
F45E12.1	chrII	+	7311455	7313727	90	63	-1.42857	0.0204271	Antisense
F52D2.8	chrX	+	1983708	1984828	157	110	-1.42857	0.00304248	Antisense	Direct
F54D5.14	chrII	+	11578629	11582675	474	333	-1.42857	7.9e-07	Antisense
F56A8.3	chrIII	+	13256758	13262770	446	310	-1.42857	9.46e-07	Antisense
F57C7.1	chrX	+	10569202	10575648	79	55	-1.42857	0.0292876	Antisense
K10F12.3	chrIII	+	365947	377550	240	167	-1.42857	0.000256418	Antisense	Direct
K12D12.5	chrII	+	11860953	11863218	319	223	-1.42857	3.66e-05	Antisense
T05C12.7	chrII	+	8185375	8187317	132	92	-1.42857	0.0060169	Antisense	Direct
T27F2.1	chrV	+	11645475	11649952	79	55	-1.42857	0.0292876	Antisense
Y110A7A.5	chrI	+	5134769	5137960	67	47	-1.42857	0.0423207	Antisense	Direct
Y48A6B.3	chrIII	+	11008112	11008699	152	107	-1.42857	0.0035936	Antisense
Y73E7A.2	chrI	+	1601840	1606850	150	105	-1.42857	0.00360776	Antisense
Y82E9BR.2	chrIII	+	1439085	1443180	469	330	-1.42857	9.24e-07	Antisense	Direct
C02B8.1	chrX	+	8147676	8148113	139	95	-1.44928	0.00364753	Antisense
C03A7.2	chrV	+	5181895	5183701	201	139	-1.44928	0.000687109	Antisense	Direct
C09G4.5	chrIV	+	8511265	8513902	238	165	-1.44928	0.000256882	Antisense	Direct
C09H6.1	chrI	+	8103594	8109221	169	117	-1.44928	0.00185406	Antisense	Direct
C18D11.4	chrIII	+	11826311	11830609	83	57	-1.44928	0.0206499	Antisense	Direct
C25A1.1	chrI	+	10162377	10163518	79	54	-1.44928	0.0246936	Antisense
C35D10.1	chrIII	+	4879707	4881460	62	43	-1.44928	0.0428004	Antisense
C46F11.2	chrIII	+	3650884	3652810	81	56	-1.44928	0.0246108	Antisense
C52B11.2	chrX	+	1300144	1308131	180	124	-1.44928	0.00112974	Antisense	Direct
C54G10.3	chrV	+	14647176	14653449	129	89	-1.44928	0.00511884	Antisense	Direct
F10G7.3	chrII	+	4702056	4703200	695	483	-1.44928	1.11e-09	Antisense	Direct
F20D12.1	chrIV	+	7957562	7962104	146	100	-1.44928	0.0200892	Sense	Direct
F36H1.6	chrIV	+	11022572	11025841	146	101	-1.44928	0.00363027	Antisense
K08E7.3	chrIV	+	12567825	12570575	372	255	-1.44928	3.96e-06	Antisense	Direct
M03D4.1	chrIV	+	6118207	6121754	723	497	-1.44928	2.36e-10	Antisense
T05G5.7	chrIII	+	9758806	9760289	139	96	-1.44928	0.00430579	Antisense	Direct
T23D8.7	chrI	+	9989790	9993503	102	70	-1.44928	0.0121277	Antisense
W01A8.1	chrI	+	7057198	7059326	97	67	-1.44928	0.0144389	Antisense
Y111B2A.14	chrIII	+	12626454	12651111	210	145	-1.44928	0.000495214	Antisense	Direct
Y113G7A.3	chrV	+	20086655	20100953	104	72	-1.44928	0.012096	Antisense
Y23H5A.1	chrI	+	2629685	2632312	2375	1650	-1.44928	7.13e-29	Antisense	Direct
Y37E3.9	chrI	+	2071353	2072551	83	57	-1.44928	0.0206499	Antisense	Direct
Y40B10A.2	chrV	+	2057628	2061130	74	51	-1.44928	0.0295679	Antisense	Direct
Y40B1B.6	chrI	+	13438055	13449918	192	133	-1.44928	0.000954073	Antisense
Y48G8AL.5	chrI	+	1193159	1207867	79	54	-1.44928	0.0246936	Antisense	Direct
Y53F4B.9	chrII	-	15004770	15010318	95	65	-1.44928	0.014472	Sense	Direct
Y79H2A.11	chrIII	+	12061619	12072157	201	138	-1.44928	0.000584099	Antisense	Direct
Y95B8A.4	chrI	+	907465	911135	173	120	-1.44928	0.0015709	Antisense	Direct
B0025.1	chrI	+	6028489	6033366	132	90	-1.47059	0.00432255	Antisense
B0035.6	chrIV	+	11320770	11323604	176	120	-1.47059	0.00113026	Antisense
C06H2.2	chrV	+	11125198	11127281	136	93	-1.47059	0.00364832	Antisense	Direct
C43E11.3	chrI	+	4254380	4264690	238	161	-1.47059	0.000133632	Antisense	Direct
D2013.8	chrII	+	9333934	9338817	152	103	-1.47059	0.00185621	Antisense	Direct
D2096.12	chrIV	+	8363444	8366359	222	150	-1.47059	0.000217618	Antisense
F22B7.13	chrIII	+	8628842	8630685	99	68	-1.47059	0.0121483	Antisense
F29B9.6	chrIV	+	4651049	4651910	58	39	-1.47059	0.0430368	Antisense
F54B3.1	chrII	+	10251573	10268089	351	240	-1.47059	6.37e-06	Antisense
K10G6.3	chrII	+	3961682	3972128	268	182	-1.47059	5.97e-05	Antisense	Direct
K11D12.2	chrV	+	5050159	5051788	199	136	-1.47059	0.000584097	Antisense
M03F8.3	chrV	+	5940006	5943344	152	104	-1.47059	0.00220111	Antisense
R11A8.6	chrIV	+	10368578	10372600	213	144	-1.47059	0.000302034	Antisense	Direct
R74.8	chrIII	+	4206249	4208238	231	157	-1.47059	0.000185566	Antisense	Direct
T04A11.6	chrIV	+	12490767	12495110	208	142	-1.47059	0.000420532	Antisense
T09A5.10	chrII	+	7860589	7863356	411	280	-1.47059	9.45e-07	Antisense	Direct
T22F3.3	chrV	+	3579043	3585036	284	194	-1.47059	4.34e-05	Antisense	Direct
W09B6.3	chrII	+	1123539	1127796	143	98	-1.47059	0.00308109	Antisense
Y105E8B.4	chrI	+	14647768	14651427	208	141	-1.47059	0.000355927	Antisense
Y116F11A.1	chrV	+	19725976	19727554	275	186	-1.47059	4.31e-05	Antisense	Direct
Y37E11B.2	chrIV	+	3578559	3579137	263	178	-1.47059	0.0017049	Sense	Direct
Y38F2AR.2	chrIV	+	2389456	2390122	146	99	-1.47059	0.00260248	Antisense
Y54E2A.12	chrII	+	14798373	14800807	150	102	-1.47059	0.00219941	Antisense	Direct
Y73B6BL.4	chrIV	+	6337636	6340080	72	49	-1.47059	0.0296566	Antisense	Direct
Y92H12BR.3	chrI	+	1416591	1425131	215	146	-1.47059	0.000302593	Antisense
ZK1067.2	chrII	+	9215133	9222774	656	446	-1.47059	6.89e-10	Antisense	Direct
B0238.10	chrV	+	5274059	5275528	109	73	-1.49254	0.00720277	Antisense
C16A3.7	chrIII	+	6375320	6379117	300	200	-1.49254	1.16e-05	Antisense	Direct
C26E6.3	chrIII	+	4944474	4947268	351	235	-1.49254	2.78e-06	Antisense
C44B11.6	chrIII	+	3152725	3153450	88	59	-1.49254	0.0491769	Sense	Direct
C53H9.1	chrI	+	1834889	1835395	90	60	-1.49254	0.0120996	Antisense	Direct
D1037.1	chrI	+	3684803	3690149	55	37	-1.49254	0.0430398	Antisense
F17A9.2	chrV	+	6107810	6114759	85	57	-1.49254	0.0144439	Antisense
F25H5.3	chrI	+	9168423	9177467	268	180	-1.49254	4.27e-05	Antisense	Direct
F26E4.1	chrI	+	9754111	9757888	233	157	-1.49254	0.000132846	Antisense	Direct
F29C12.4	chrII	+	13117390	13121993	97	65	-1.49254	0.0101791	Antisense
F33H1.3	chrII	+	10172846	10174202	81	54	-1.49254	0.0172621	Antisense
F41E6.4	chrV	+	8607776	8615056	132	88	-1.49254	0.00305504	Antisense
F52C9.8	chrIII	+	5311204	5321691	330	220	-1.49254	4.43e-06	Antisense	Direct
H34C03.2	chrIV	+	6757294	6762572	379	255	-1.49254	1.49e-06	Antisense	Direct
K10D2.1	chrIII	+	5188695	5196644	483	322	-1.49254	3.81e-08	Antisense	Direct
K10E9.1	chrI	+	189653	202489	282	190	-1.49254	3.11e-05	Antisense	Direct
R07H5.2	chrIV	+	11179614	11182972	157	106	-1.49254	0.00156949	Antisense	Direct
R09G11.2	chrX	+	17518363	17528106	159	107	-1.49254	0.00132358	Antisense	Direct
T23B5.3	chrIV	+	12691917	12703969	319	214	-1.49254	8.55e-06	Antisense
T23G5.6	chrIII	+	9240276	9242404	1790	1192	-1.49254	8.17e-26	Antisense	Direct
T28A8.3	chrIII	+	13506046	13508353	95	63	-1.49254	0.0101463	Antisense
W06B4.1	chrII	+	4471391	4473544	60	40	-1.49254	0.0356911	Antisense
Y48C3A.14	chrII	+	13389668	13401900	132	88	-1.49254	0.00305504	Antisense	Direct
Y52B11A.3	chrI	+	10970485	10980104	62	42	-1.49254	0.0357206	Antisense
Y54F10AL.2	chrIII	+	2473855	2486609	120	81	-1.49254	0.00511406	Antisense	Direct
Y54G11A.3	chrII	+	14276552	14283861	120	80	-1.49254	0.00428147	Antisense
ZC434.5	chrI	+	10336402	10340801	189	127	-1.49254	0.000489377	Antisense
ZK328.1	chrIII	+	6020111	6024600	497	333	-1.49254	3.32e-08	Antisense
ZK856.1	chrV	+	10179504	10183106	88	59	-1.49254	0.0144779	Antisense
ZK858.1	chrI	+	9118106	9121236	88	59	-1.49254	0.0144779	Antisense
C06A5.1	chrI	+	6012059	6021985	166	109	-1.51515	0.000659066	Antisense
C07D8.6	chrX	+	7341456	7342728	62	41	-1.51515	0.0295571	Antisense
C16A3.3	chrIII	+	6383493	6389343	273	181	-1.51515	2.57e-05	Antisense
C29H12.2	chrII	+	6123776	6125045	85	56	-1.51515	0.0119802	Antisense
C33H5.4	chrIV	+	7797103	7800425	416	276	-1.51515	2.5e-07	Antisense	Direct
C38D4.5	chrIII	+	4796877	4802540	139	92	-1.51515	0.00216591	Antisense
F10E7.2	chrII	+	7122180	7124325	404	265	-1.51515	2.02e-07	Antisense	Direct
F13H10.5	chrIV	+	10991008	10994107	150	99	-1.51515	0.00129768	Antisense	Direct
F18C5.3	chrII	+	6546798	6554795	134	88	-1.51515	0.00213931	Antisense
F26G1.1	chrII	+	4790303	4795618	157	103	-1.51515	0.000920849	Antisense
F32D1.9	chrV	+	4371888	4373638	152	101	-1.51515	0.00130574	Antisense	Direct
F45E12.2	chrII	+	7305800	7308620	127	84	-1.51515	0.00302597	Antisense
F52C12.4	chrIV	+	1923569	1946202	74	49	-1.51515	0.0205979	Antisense	Direct
F56D12.6	chrII	+	1310540	1320431	85	56	-1.51515	0.0119802	Antisense
F58G11.1	chrV	+	13661242	13664215	229	152	-1.51515	0.000110773	Antisense
K09H9.2	chrI	+	3148017	3150305	53	35	-1.51515	0.0429502	Antisense
T01C3.8	chrV	+	15002527	15005031	134	89	-1.51515	0.0025662	Antisense
T12E12.2	chrIV	+	5544846	5548436	825	548	-1.51515	6.48e-13	Antisense
T24H10.1	chrII	+	9099296	9100374	76	50	-1.51515	0.0171186	Antisense	Direct
Y119D3B.8	chrIII	+	1239273	1242728	240	159	-1.51515	6.74e-05	Antisense	Direct
Y50D4A.1	chrV	+	1207890	1219848	53	35	-1.51515	0.0429502	Antisense
ZC395.3	chrIII	+	5275183	5277756	256	168	-1.51515	2.92e-05	Antisense	Direct
B0041.2	chrI	+	4655347	4659318	143	93	-1.53846	0.00126656	Antisense
C06A1.5	chrII	+	10579287	10579816	111	72	-1.53846	0.00417041	Antisense
C16A3.8	chrIII	+	6367983	6373844	182	119	-1.53846	0.000335946	Antisense	Direct
C23G10.4	chrIII	+	6198845	6201990	596	387	-1.53846	1.78e-10	Antisense	Direct
C27A12.2	chrI	+	6041671	6046011	51	33	-1.53846	0.0427539	Antisense
F01G10.1	chrIV	+	10243586	10245624	589	381	-1.53846	1.72e-10	Antisense	Direct
F10G7.2	chrII	+	4706831	4709762	259	169	-1.53846	2.46e-05	Antisense
F11A10.1	chrIV	+	12079443	12084330	240	155	-1.53846	3.27e-05	Antisense
F28D1.1	chrIV	+	12372222	12374647	55	36	-1.53846	0.0354045	Antisense
F32D1.10	chrV	+	4347183	4349530	751	488	-1.53846	9.91e-13	Antisense	Direct
F36D4.3	chrV	+	9386126	9400035	1629	1053	-1.53846	5.21e-26	Antisense	Direct
F58A4.7	chrIII	+	9622044	9626450	164	107	-1.53846	0.000653528	Antisense	Direct
F59E12.1	chrII	+	5654486	5657343	132	85	-1.53846	0.00175797	Antisense	Direct
K05C4.5	chrI	+	14742751	14747777	233	152	-1.53846	5.5e-05	Antisense
T12E12.3	chrIV	+	5541619	5544720	2414	1572	-1.53846	8.7e-37	Antisense	Direct
T14B4.1	chrII	+	6736846	6741418	97	63	-1.53846	0.00701494	Antisense	Direct
T17E9.1	chrIII	+	6118570	6124011	178	116	-1.53846	0.000396576	Antisense
T27B7.6	chrV	+	2281875	2284955	51	33	-1.53846	0.0427539	Antisense	Direct
Y104H12D.3	chrIV	+	1193075	1201846	125	81	-1.53846	0.00249449	Antisense	Direct
Y43F4B.4	chrIII	+	13296732	13298817	134	87	-1.53846	0.00177579	Antisense
Y49A3A.2	chrV	+	14351694	14353896	69	45	-1.53846	0.0203704	Antisense
Y51H7C.6	chrII	+	1403349	1409124	109	71	-1.53846	0.00499729	Antisense
Y73F8A.33	chrIV	+	15515455	15521144	178	115	-1.53846	0.00032931	Antisense
Y76B12C.8	chrIV	+	1979986	1980362	564	366	-1.53846	5.38e-10	Antisense
ZK430.2	chrII	+	4420263	4422307	51	33	-1.53846	0.0427539	Antisense	Direct
C01A2.1	chrI	-	13408784	13410495	132	84	-1.5625	0.00144925	Sense	Direct
C05C10.2	chrII	+	9922169	9930752	171	109	-1.5625	0.00031742	Antisense
C07G2.1	chrIII	+	4489324	4491364	215	137	-1.5625	6.04e-05	Antisense	Direct
C08F8.3	chrIV	+	11155000	11156606	139	89	-1.5625	0.00123965	Antisense	Direct
C17G10.1	chrII	+	5596542	5598291	74	47	-1.5625	0.0139246	Antisense
C29F9.1	chrIII	+	132423	134369	53	34	-1.5625	0.0351262	Antisense
F09F7.4	chrIII	+	5555359	5557274	109	70	-1.5625	0.00412972	Antisense
F10G7.1	chrII	+	4710281	4713501	372	238	-1.5625	2.07e-07	Antisense	Direct
F44G4.1	chrII	+	8994554	8996188	85	55	-1.5625	0.00987077	Antisense	Direct
F57B10.4	chrI	+	6566173	6568906	187	120	-1.5625	0.000195816	Antisense
F57C9.4	chrI	+	4830135	4835619	67	43	-1.5625	0.0201937	Antisense
H06I04.4	chrIII	+	3068324	3069151	83	53	-1.5625	0.00976025	Antisense
K08E3.3	chrIII	+	13755878	13759307	92	59	-1.5625	0.00687024	Antisense	Direct
M01D7.7	chrI	+	1835679	1841192	116	74	-1.5625	0.00289667	Antisense
M03C11.3	chrIII	+	10404959	10414590	83	53	-1.5625	0.0339948	Sense
M04F3.1	chrI	+	4770304	4771267	90	58	-1.5625	0.0082776	Antisense
R13A5.12	chrIII	+	7573276	7575063	217	138	-1.5625	5.06e-05	Antisense
T27F6.6	chrI	+	12490964	12494515	102	65	-1.5625	0.00485292	Antisense
W01B11.3	chrI	+	3267094	3269120	340	219	-1.5625	9.22e-07	Antisense
W05F2.6	chrI	+	3368814	3371445	97	62	-1.5625	0.00577183	Antisense
Y110A7A.9	chrI	+	5119225	5123988	176	112	-1.5625	0.000268969	Antisense
Y41D4B.4	chrIV	+	1660109	1669681	76	49	-1.5625	0.0140818	Antisense	Direct
Y47D3B.11	chrIII	+	11456757	11462763	132	84	-1.5625	0.00144925	Antisense
ZK1128.6	chrIII	+	10124075	10132618	53	34	-1.5625	0.0351262	Antisense
ZK742.1	chrV	+	7805044	7814613	259	165	-1.5625	1.17e-05	Antisense
ZK909.3	chrI	+	14953481	14955400	72	46	-1.5625	0.016851	Antisense	Direct
B0205.9	chrI	+	10720814	10723471	99	63	-1.5873	0.00479032	Antisense
C06C3.1	chrII	+	9358456	9369011	125	78	-1.5873	0.00138404	Antisense
C14B1.10	chrIII	+	3709341	3712860	46	29	-1.5873	0.0419732	Antisense
C27B7.1	chrIV	+	8891451	8892727	55	35	-1.5873	0.0288269	Antisense
C36A4.5	chrIII	+	3844253	3848241	434	272	-1.5873	6.99e-09	Antisense	Direct
C38D4.3	chrIII	+	4786043	4792355	529	331	-1.5873	1.7e-10	Antisense	Direct
C47G2.5	chrII	+	11297616	11301181	649	408	-1.5873	2.36e-12	Antisense	Direct
C50C3.1	chrIII	+	8191738	8193586	143	90	-1.5873	0.000707604	Antisense	Direct
E02H1.3	chrII	+	9591326	9592775	69	44	-1.5873	0.0166632	Antisense	Direct
F15D4.1	chrII	+	13200078	13215613	383	243	-1.5873	8.67e-08	Antisense	Direct
F59A2.6	chrIII	+	3415537	3424729	72	45	-1.5873	0.0137362	Antisense
K08F11.1	chrIV	+	4724852	4725304	642	403	-1.5873	2.71e-12	Antisense	Direct
T05H10.5	chrII	+	8062672	8068038	538	339	-1.5873	1.82e-10	Antisense	Direct
T14B4.2	chrII	+	6736143	6736661	55	35	-1.5873	0.0288269	Antisense	Direct
T20F5.2	chrI	+	3908748	3909647	62	39	-1.5873	0.0196925	Antisense
T23G7.1	chrII	+	9169829	9172483	210	133	-1.5873	5.86e-05	Antisense	Direct
Y75B8A.19	chrIII	+	12226430	12231998	201	126	-1.5873	6.68e-05	Antisense	Direct
ZC376.6	chrV	+	14185762	14192106	118	74	-1.5873	0.00197415	Antisense
ZK1128.5	chrIII	+	10120673	10122816	152	96	-1.5873	0.000506994	Antisense
ZK809.5	chrIV	+	11656706	11659368	67	42	-1.5873	0.0164352	Antisense	Direct
C09H10.7	chrII	+	11108147	11109507	201	125	-1.6129	5.46e-05	Antisense
C16A3.4	chrIII	+	6381587	6382843	74	46	-1.6129	0.0113128	Antisense
C29A12.3	chrV	+	10814087	10816690	90	56	-1.6129	0.00551681	Antisense
C34B4.2	chrV	+	13086174	13090422	81	50	-1.6129	0.00781265	Antisense
C37C3.2	chrV	+	7855197	7857914	575	354	-1.6129	8.85e-12	Antisense
C50F2.3	chrI	+	3877064	3880749	99	62	-1.6129	0.00390717	Antisense
C55A6.10	chrV	+	11505331	11508240	69	43	-1.6129	0.0135139	Antisense
F01F1.6	chrIII	+	5857160	5858901	275	171	-1.6129	2.77e-06	Antisense	Direct
F08F8.2	chrIII	+	7359422	7362026	224	138	-1.6129	1.62e-05	Antisense
F09F7.3	chrIII	+	5557320	5564635	286	177	-1.6129	1.37e-06	Antisense
F10C2.4	chrV	+	12041583	12045298	102	63	-1.6129	0.00323193	Antisense
F14D2.4	chrII	+	3350253	3352770	44	27	-1.6129	0.0413478	Antisense
F23F12.6	chrIII	+	6489738	6491118	146	90	-1.6129	0.000479812	Antisense
F28D1.10	chrIV	+	12404398	12408656	351	218	-1.6129	1.21e-07	Antisense	Direct
F33E11.1	chrV	+	320357	323629	524	327	-1.6129	1.63e-10	Antisense	Direct
F42A9.2	chrIV	+	8620664	8626131	328	203	-1.6129	2.68e-07	Antisense
F56A3.3	chrI	+	5176468	5182738	520	320	-1.6129	8.62e-11	Antisense
F56H11.3	chrIV	+	9529963	9531204	229	142	-1.6129	1.69e-05	Antisense
F57B10.3	chrI	+	6569494	6572599	296	183	-1.6129	9.97e-07	Antisense
F58B3.6	chrIV	+	11636617	11638164	249	154	-1.6129	6.04e-06	Antisense	Direct
F58G11.6	chrV	+	13678856	13681524	134	83	-1.6129	0.000806141	Antisense
F59A6.5	chrII	+	4999509	5003779	344	213	-1.6129	1.39e-07	Antisense
K07F5.13	chrIV	+	9858458	9861718	182	113	-1.6129	0.000104886	Antisense
M03C11.3	chrIII	+	10404959	10414590	60	37	-1.6129	0.0193581	Antisense
R09E12.3	chrV	+	773551	774859	81	50	-1.6129	0.00781265	Antisense
T05A6.2	chrII	+	7816439	7818193	166	103	-1.6129	0.0002061	Antisense	Direct
T13F2.6	chrIV	+	9778261	9781177	148	92	-1.6129	0.000489384	Antisense	Direct
W04D2.6	chrV	+	12498231	12503715	69	43	-1.6129	0.0135139	Antisense
W06B4.3	chrII	+	4461420	4467886	136	84	-1.6129	0.00066861	Antisense
Y45F10D.7	chrIV	+	13788902	13796191	129	80	-1.6129	0.00095263	Antisense
Y46G5A.2	chrII	+	12679862	12686622	81	50	-1.6129	0.00781265	Antisense	Direct
Y51A2D.7	chrV	+	18533918	18549008	104	64	-1.6129	0.00267143	Antisense	Direct
Y53G8B.1	chrIII	+	3129308	3131226	44	27	-1.6129	0.0413478	Antisense	Direct
Y55F3AL.1	chrIV	+	959451	984392	152	94	-1.6129	0.000337651	Antisense
Y71A12B.10	chrI	+	13957185	13960427	1532	950	-1.6129	7.48e-28	Antisense	Direct
Y71F9B.3	chrI	+	2730010	2731246	125	77	-1.6129	0.0011261	Antisense
Y75B8A.25	chrIII	+	12273919	12282101	213	132	-1.6129	3.29e-05	Antisense
ZK512.5	chrIII	+	9125749	9130704	185	114	-1.6129	8.73e-05	Antisense
B0412.3	chrIII	+	795132	809354	111	68	-1.63934	0.00186399	Antisense
C06A8.5	chrII	+	7781508	7783280	725	445	-1.63934	1.53e-14	Antisense	Direct
C14A4.1	chrII	+	10579899	10580890	111	68	-1.63934	0.00186399	Antisense
C18H9.3	chrII	+	6684195	6688587	92	56	-1.63934	0.00366999	Antisense
C34E10.6	chrIII	+	5228386	5230194	150	91	-1.63934	0.000267141	Antisense
C35D10.9	chrIII	+	4852287	4855129	90	55	-1.63934	0.00445766	Antisense
C50A2.2	chrIV	+	1170705	1176675	55	34	-1.63934	0.0232202	Antisense	Direct
C50F4.7	chrV	+	9547055	9547576	69	42	-1.63934	0.0108622	Antisense
F01G4.4	chrIV	+	11143316	11145895	58	35	-1.63934	0.0489436	Sense	Direct
F10B5.7	chrII	+	8162487	8168577	178	108	-1.63934	8.14e-05	Antisense
F37C12.1	chrIII	+	7184276	7187780	62	38	-1.63934	0.0158433	Antisense
F55A3.3	chrI	+	10789118	10793136	273	165	-1.63934	1.19e-06	Antisense	Direct
K01C8.3	chrII	+	8270538	8273515	74	45	-1.63934	0.00911425	Antisense	Direct
K02F3.1	chrIII	+	854206	856519	72	44	-1.63934	0.0111025	Antisense
K02F3.12	chrIII	+	856626	860036	58	35	-1.63934	0.0189605	Antisense
K02F3.4	chrIII	+	834451	835600	233	142	-1.63934	7.76e-06	Antisense	Direct
K04G2.8	chrI	+	8050036	8055460	182	112	-1.63934	8.54e-05	Antisense	Direct
R151.2	chrIII	+	7212459	7214643	129	79	-1.63934	0.000772041	Antisense
T05A7.4	chrII	+	4673073	4673589	915	562	-1.63934	8e-18	Antisense	Direct
T12G3.1	chrIV	+	12034252	12036691	1291	784	-1.63934	2.99e-25	Antisense	Direct
T25E12.4	chrV	+	16747529	16788386	69	42	-1.63934	0.0108622	Antisense	Direct
W09C5.2	chrI	+	13629214	13633482	150	92	-1.63934	0.000330296	Antisense
Y116F11A.1	chrV	+	19725976	19727554	58	35	-1.63934	0.0489436	Sense	Direct
Y24D9A.2	chrIV	+	4390845	4393397	192	116	-1.63934	4.05e-05	Antisense
Y32B12B.4	chrV	+	16553306	16563463	150	91	-1.63934	0.000267141	Antisense
Y39A1A.15	chrIII	+	10655651	10677044	62	38	-1.63934	0.0158433	Antisense	Direct
Y53F4B.13	chrII	+	15026081	15036934	69	42	-1.63934	0.0108622	Antisense
Y71A12B.17	chrI	+	13984294	13989575	626	384	-1.63934	8.72e-13	Antisense	Direct
Y71F9AM.4	chrI	+	2931461	2947153	69	42	-1.63934	0.0108622	Antisense
C01H6.7	chrI	+	7224731	7227762	102	61	-1.66667	0.00209961	Antisense
C07H6.5	chrIII	-	7496185	7497718	635	381	-1.66667	9.94e-14	Sense	Direct
C10F3.1	chrV	+	5996339	5999266	240	144	-1.66667	3.59e-06	Antisense
C39E9.12	chrIV	+	13093979	13095348	55	33	-1.66667	0.0469091	Sense	Direct
F22B5.1	chrII	+	8444237	8445036	118	71	-1.66667	0.00104946	Antisense	Direct
F41G3.14	chrII	+	6741675	6742702	55	33	-1.66667	0.0184937	Antisense
F46F2.4	chrX	+	15257517	15258932	464	277	-1.66667	1.3e-10	Antisense	Direct
F53G12.4	chrI	+	134336	137282	273	164	-1.66667	9.62e-07	Antisense	Direct
K07C5.3	chrV	+	10343003	10345457	120	72	-1.66667	0.000865578	Antisense
M18.7	chrIV	+	12123124	12124779	152	91	-1.66667	0.000177751	Antisense	Direct
R05H10.2	chrII	+	14857160	14866490	240	143	-1.66667	2.89e-06	Antisense	Direct
T05H10.1	chrII	+	8042518	8047379	356	214	-1.66667	2.45e-08	Antisense
T06G6.9	chrI	+	12728160	12729859	49	29	-1.66667	0.0272726	Antisense	Direct
T11F8.3	chrIV	+	5470015	5473075	455	275	-1.66667	4.13e-10	Antisense	Direct
T21C9.12	chrV	+	10599078	10602121	55	33	-1.66667	0.0184937	Antisense
T24B1.1	chrI	+	7676662	7679056	88	53	-1.66667	0.00435213	Antisense	Direct
W02A2.7	chrIV	+	13353690	13356072	275	165	-1.66667	7.99e-07	Antisense	Direct
W03G9.3	chrI	+	4959397	4961520	222	133	-1.66667	8.4e-06	Antisense	Direct
Y110A7A.8	chrI	+	5127852	5129537	118	71	-1.66667	0.00104946	Antisense
Y39B6A.33	chrV	+	19001919	19006675	67	40	-1.66667	0.0105898	Antisense	Direct
Y39G10AR.21	chrI	+	2308977	2312046	125	75	-1.66667	0.000734017	Antisense	Direct
Y39G10AR.6	chrI	+	2333326	2338689	189	114	-1.66667	3.95e-05	Antisense
Y47D3A.29	chrIII	+	11142329	11154033	256	154	-1.66667	1.86e-06	Antisense	Direct
Y52D3.1	chrIII	+	10947327	10951051	65	39	-1.66667	0.0129572	Antisense
ZK1225.6	chrI	+	13219073	13219533	152	91	-1.66667	0.000177751	Antisense
B0207.4	chrI	+	5937478	5938883	240	141	-1.69492	1.86e-06	Antisense
B0336.1	chrIII	+	5722799	5727065	501	296	-1.69492	1.29e-11	Antisense
C33H5.4	chrIV	+	7797103	7800425	79	46	-1.69492	0.0179058	Sense	Direct
C47D12.2	chrII	+	11676221	11679111	150	88	-1.69492	0.000137595	Antisense
D2096.2	chrIV	+	8379971	8381799	39	23	-1.69492	0.0394976	Antisense
F11A10.2	chrIV	+	12084448	12085270	106	63	-1.69492	0.00142051	Antisense
F22B5.7	chrII	+	8457748	8464448	698	411	-1.69492	1.33e-15	Antisense	Direct
F25H2.13	chrI	+	10572017	10577113	65	38	-1.69492	0.0102834	Antisense
F28B3.9	chrI	+	4929099	4932148	150	88	-1.69492	0.000137595	Antisense
F32H2.1	chrI	+	8962313	8966110	243	142	-1.69492	1.54e-06	Antisense	Direct
F35F11.1	chrIV	+	4042567	4047779	125	74	-1.69492	0.000587903	Antisense	Direct
F40F8.9	chrII	+	11126873	11127436	95	56	-1.69492	0.00241042	Antisense
F42G8.4	chrIV	+	8140226	8142781	215	126	-1.69492	6.13e-06	Antisense	Direct
F46F3.4	chrV	+	11675919	11685251	125	73	-1.69492	0.000468304	Antisense
F47D12.4	chrIII	+	6280327	6282361	116	68	-1.69492	0.00081473	Antisense	Direct
F54H12.1	chrIII	+	7973645	7977100	106	63	-1.69492	0.00142051	Antisense
F59H6.2	chrII	+	2019654	2022442	314	185	-1.69492	8.18e-06	Sense
H09G03.1	chrIII	+	3226340	3230641	90	53	-1.69492	0.0124228	Sense	Direct
M57.2	chrIV	+	3527354	3532263	72	42	-1.69492	0.00706131	Antisense
R05D3.11	chrIII	+	8375218	8380768	397	233	-1.69492	1.07e-09	Antisense
R06A4.6	chrII	+	14381529	14383212	330	196	-1.69492	4.17e-08	Antisense	Direct
T01D1.2	chrII	+	162373	170628	79	46	-1.69492	0.00486701	Antisense
T21E3.1	chrI	+	3932211	3934792	81	48	-1.69492	0.00502168	Antisense
T23B12.2	chrV	+	8467242	8468921	79	46	-1.69492	0.00486701	Antisense
W02G9.5	chrV	+	2658031	2660776	136	81	-1.69492	0.00034998	Antisense	Direct
W10C6.1	chrII	+	11113257	11120712	291	172	-1.69492	2.16e-07	Antisense
Y18D10A.25	chrI	+	12916429	12918052	1490	885	-1.69492	1.22e-30	Antisense	Direct
Y47G6A.11	chrI	+	3449327	3462171	136	81	-1.69492	0.00034998	Antisense	Direct
Y48C3A.17	chrII	+	13406067	13411188	39	23	-1.69492	0.0394976	Antisense
ZC513.6	chrV	+	8029417	8031191	65	38	-1.69492	0.0102834	Antisense
C09G9.6	chrIV	+	8889067	8890514	69	40	-1.72414	0.00682149	Antisense
C14B1.6	chrIII	+	3713441	3718750	76	44	-1.72414	0.00469917	Antisense
C25A1.16	chrI	+	10179006	10179684	69	40	-1.72414	0.00682149	Antisense
C29E4.4	chrIII	+	7928977	7932922	425	245	-1.72414	1.12e-10	Antisense	Direct
C41A3.1	chrX	+	5413776	5441885	663	386	-1.72414	2.36e-15	Antisense	Direct
C41G7.4	chrI	+	9519625	9521181	173	101	-1.72414	3.95e-05	Antisense
C48E7.2	chrI	+	6255036	6257637	53	31	-1.72414	0.0179512	Antisense
E01G4.5	chrII	+	13472338	13473831	1003	585	-1.72414	3.33e-22	Antisense	Direct
F53A2.7	chrIII	+	13344796	13346763	134	78	-1.72414	0.000269696	Antisense
F53F4.12	chrV	+	13626028	13627392	157	91	-1.72414	7.68e-05	Antisense	Direct
F54C1.3	chrI	+	4996841	5003161	120	70	-1.72414	0.000550214	Antisense
F57B10.6	chrI	+	6558700	6562300	55	32	-1.72414	0.0145551	Antisense
M163.3	chrX	+	14490027	14491032	2710	1573	-1.72414	1.3e-57	Antisense	Direct
T06E4.1	chrV	+	9645812	9650270	282	163	-1.72414	1.5e-07	Antisense
T24H7.1	chrII	+	6251363	6252802	444	259	-1.72414	9.62e-11	Antisense
T27E9.1	chrIII	+	13463041	13464531	480	279	-1.72414	1.17e-11	Antisense	Direct
Y106G6D.7	chrI	+	10122459	10130194	194	113	-1.72414	1.39e-05	Antisense
Y39G8C.1	chrII	+	14068899	14083442	270	157	-1.72414	3.09e-07	Antisense	Direct
ZK1307.9	chrII	+	9649412	9650814	49	28	-1.72414	0.0214367	Antisense	Direct
ZK632.1	chrIII	+	9794265	9798541	203	117	-1.72414	6.4e-06	Antisense	Direct
C04G2.10	chrIV	+	10115361	10118055	894	507	-1.75439	1.92e-21	Antisense	Direct
C35B1.2	chrIV	+	4086204	4102888	37	21	-1.75439	0.0382078	Antisense	Direct
C37A2.4	chrI	+	6780821	6784360	116	66	-1.75439	0.000509632	Antisense	Direct
C39B5.2	chrIII	+	2233875	2236970	268	153	-1.75439	1.87e-07	Antisense	Direct
D1046.1	chrIV	+	8926321	8929011	88	50	-1.75439	0.00216355	Antisense	Direct
F10E9.4	chrIII	+	8308469	8309594	37	21	-1.75439	0.0382078	Antisense	Direct
F18C12.3	chrI	+	8095733	8098417	88	50	-1.75439	0.00216355	Antisense
F31E3.3	chrIII	+	6972145	6973636	92	53	-1.75439	0.00183957	Antisense
F44F1.7	chrI	+	13269982	13272771	72	41	-1.75439	0.00555242	Antisense	Direct
F55G1.4	chrIV	+	7478435	7485503	541	306	-1.75439	1.06e-13	Antisense
H05C05.1	chrIII	+	2947080	2960564	65	37	-1.75439	0.00807616	Antisense	Direct
H25P06.2	chrI	+	11323518	11333132	323	185	-1.75439	1.21e-08	Antisense	Direct
K10C3.5	chrI	+	9863588	9869040	129	74	-1.75439	0.00024971	Antisense
R05D3.11	chrIII	+	8375218	8380768	88	50	-1.75439	0.00956785	Sense
R09A1.1	chrV	+	1008804	1018355	58	33	-1.75439	0.0117978	Antisense	Direct
T22C1.1	chrI	+	7936259	7937645	67	38	-1.75439	0.00655912	Antisense
T28A8.6	chrIII	+	13499083	13501389	196	111	-1.75439	5.64e-06	Antisense
Y32G9A.2	chrV	+	1920547	1921029	143	82	-1.75439	0.000122932	Antisense	Direct
Y54H5A.4	chrIII	-	5155490	5158726	441	250	-1.75439	1.85e-11	Sense
Y76B12C.6	chrIV	+	1986274	1991719	109	62	-1.75439	0.000729592	Antisense	Direct
ZK652.3	chrIII	+	7858904	7859441	233	134	-1.75439	1.32e-06	Antisense
ZK829.4	chrIV	+	11953221	11955184	65	37	-1.75439	0.00807616	Antisense
B0457.1	chrII	+	8896761	8908557	113	63	-1.78571	0.000380836	Antisense
C02F4.1	chrIV	+	10484081	10492924	206	115	-1.78571	2.57e-06	Antisense
C14A4.14	chrII	+	10582539	10584140	129	73	-1.78571	0.000196015	Antisense
C24G6.1	chrV	+	5536684	5537697	65	36	-1.78571	0.00627353	Antisense
C24G6.3	chrV	+	5514331	5520435	85	48	-1.78571	0.00207143	Antisense
C37H5.5	chrV	+	4827350	4835920	249	140	-1.78571	2.67e-07	Antisense	Direct
C40A11.10	chrII	-	2136554	2137301	506	285	-1.78571	4.53e-13	Sense	Direct
C47E8.8	chrV	+	14696996	14707570	273	154	-1.78571	1e-07	Antisense
F01F1.4	chrIII	+	5864497	5866453	62	35	-1.78571	0.00774518	Antisense
F14D2.4	chrII	+	3350253	3352770	46	26	-1.78571	0.0473558	Sense
F37D6.3	chrI	+	10486704	10487313	3128	1736	-1.78571	2.93e-74	Antisense	Direct
F52C12.1	chrIV	+	1959852	1963223	141	79	-1.78571	9.23e-05	Antisense
H38K22.2	chrIII	+	4313904	4317576	127	71	-1.78571	0.000187096	Antisense
T10G3.6	chrV	+	13497684	13498800	55	31	-1.78571	0.0113128	Antisense
T22C1.3	chrI	+	7938553	7940108	109	61	-1.78571	0.000571061	Antisense
T24C4.1	chrIII	+	879846	881448	72	40	-1.78571	0.00432282	Antisense	Direct
T24H10.5	chrII	+	9102628	9105370	261	146	-1.78571	1.28e-07	Antisense	Direct
T26A5.2	chrIII	+	6467323	6471569	88	49	-1.78571	0.00168652	Antisense	Direct
T28D9.2	chrII	+	6490119	6491296	187	105	-1.78571	7.62e-06	Antisense	Direct
Y47G6A.4	chrI	+	3547092	3552007	39	22	-1.78571	0.0306269	Antisense
Y48B6A.3	chrII	+	14155670	14165921	538	299	-1.78571	3.05e-14	Antisense	Direct
B0464.2	chrIII	+	9491540	9496947	92	51	-1.81818	0.00111712	Antisense
C01A2.6	chrI	+	13379904	13384359	42	23	-1.81818	0.0245566	Antisense	Direct
C06G4.2	chrIII	+	7981097	7986256	157	86	-1.81818	2.27e-05	Antisense
C39B5.6	chrIII	+	2197993	2206870	152	84	-1.81818	3.39e-05	Antisense	Direct
C53B4.4	chrIV	+	8973677	8984686	213	116	-1.81818	8.58e-07	Antisense
D1054.3	chrV	+	10771425	10772807	60	33	-1.81818	0.00738331	Antisense	Direct
D2096.1	chrIV	+	8396644	8398419	677	375	-1.81818	1.4e-17	Antisense	Direct
F12F6.1	chrIV	+	11585193	11588292	74	41	-1.81818	0.00350812	Antisense	Direct
F18C12.2	chrI	+	8083576	8095588	178	97	-1.81818	6.2e-06	Antisense
F25B5.2	chrIII	+	5959253	5961982	344	191	-1.81818	1.03e-09	Antisense	Direct
F31D4.3	chrV	+	20841567	20842955	169	93	-1.81818	1.38e-05	Antisense
F35B12.5	chrV	+	11610685	11613032	88	48	-1.81818	0.00130352	Antisense
F35H12.2	chrX	+	924985	932236	62	34	-1.81818	0.00596418	Antisense
F57B9.5	chrIII	+	6931940	6933500	178	97	-1.81818	6.2e-06	Antisense
K02F2.1	chrI	+	6838352	6843342	95	52	-1.81818	0.000908875	Antisense
K04C2.2	chrIII	+	6889710	6895026	146	80	-1.81818	4.81e-05	Antisense
R06A4.2	chrII	+	14361924	14364777	134	74	-1.81818	0.000102207	Antisense	Direct
T08D2.7	chrX	+	182690	190559	67	37	-1.81818	0.00508065	Antisense
W03D8.7	chrI	+	2796383	2797262	88	48	-1.81818	0.00130352	Antisense	Direct
Y102A5A.1	chrV	+	16802844	16814539	286	157	-1.81818	1.48e-08	Antisense
Y48G8AL.6	chrI	+	1176474	1189653	152	84	-1.81818	3.39e-05	Antisense	Direct
ZK632.7	chrIII	+	9819191	9823018	176	96	-1.81818	7.57e-06	Antisense	Direct
B0250.5	chrV	+	20489311	20492731	49	26	-1.85185	0.0126797	Antisense
B0261.1	chrI	+	5263696	5268385	176	95	-1.85185	5.85e-06	Antisense
C04G6.1	chrII	+	5104412	5108855	95	51	-1.85185	0.000698315	Antisense	Direct
C15C6.1	chrI	+	12202221	12203645	109	59	-1.85185	0.00034267	Antisense	Direct
C36E8.3	chrIII	+	4006118	4009939	420	225	-1.85185	2e-12	Antisense	Direct
C44C10.5	chrX	+	11691031	11692379	467	252	-1.85185	2.35e-13	Antisense	Direct
F20C5.1	chrIV	+	8746235	8752658	245	132	-1.85185	8.78e-08	Antisense
H09G03.1	chrIII	+	3226340	3230641	270	147	-1.85185	2.75e-08	Antisense	Direct
R05D3.2	chrIII	+	8372173	8375084	529	288	-1.85185	1.16e-14	Antisense
R06A10.2	chrI	+	1068997	1074345	231	124	-1.85185	1.73e-07	Antisense	Direct
Y111B2A.13	chrIII	+	12624645	12625768	164	88	-1.85185	9.52e-06	Antisense	Direct
Y39A1A.12	chrIII	+	10643015	10645841	106	57	-1.85185	0.000323097	Antisense
Y41E3.16	chrIV	+	15040035	15042354	85	46	-1.85185	0.0012317	Antisense	Direct
Y48G1C.2	chrI	+	72648	80344	49	26	-1.85185	0.0126797	Antisense
Y71G12B.28	chrI	+	1829770	1832063	300	162	-1.85185	3.48e-09	Antisense	Direct
ZK1098.2	chrIII	+	9529066	9531789	67	36	-1.85185	0.00389147	Antisense
ZK430.1	chrII	+	4425201	4432604	691	371	-1.85185	3.5e-19	Antisense	Direct
C01B10.8	chrIV	+	6635075	6638003	157	83	-1.88679	1.03e-05	Antisense
C14A4.5	chrII	+	10592678	10593452	83	44	-1.88679	0.00115751	Antisense
C36B1.8	chrI	+	8737064	8742533	233	123	-1.88679	8.31e-08	Antisense	Direct
D1043.1	chrII	+	11582761	11588441	217	115	-1.88679	2.62e-07	Antisense	Direct
F13H8.2	chrII	+	6270323	6273954	256	137	-1.88679	3.22e-08	Antisense
F15A4.11	chrII	+	12459686	12460344	30	16	-1.88679	0.0437652	Antisense	Direct
F25H2.11	chrI	+	10569122	10569923	199	105	-1.88679	2.54e-05	Sense
F29C12.5	chrII	+	13122945	13124697	2934	1567	-1.88679	1.83e-76	Antisense	Direct
F43E2.1	chrII	+	7375217	7377520	832	437	-1.88679	7.58e-24	Antisense	Direct
F54F2.2	chrIII	+	8793305	8805532	386	206	-1.88679	1.38e-11	Antisense	Direct
F55F10.1	chrIV	+	4360842	4386526	631	334	-1.88679	3.33e-18	Antisense	Direct
H20J04.2	chrII	+	4340145	4350979	92	49	-1.88679	0.000656366	Antisense
T01A4.3	chrI	+	4463854	4466904	1448	769	-1.88679	2.88e-39	Antisense	Direct
T05F1.13	chrI	+	9650556	9652804	146	77	-1.88679	2.18e-05	Antisense	Direct
T07G12.12	chrIV	+	10561885	10563919	95	50	-1.88679	0.000532057	Antisense
T19A5.2	chrV	+	8947774	8955477	342	180	-1.88679	9.54e-11	Antisense
T24F1.2	chrII	+	11302807	11305585	129	68	-1.88679	5.35e-05	Antisense	Direct
T25G3.2	chrI	+	7554995	7559451	213	113	-1.88679	3.92e-07	Antisense	Direct
T27F2.3	chrV	+	11644740	11645252	72	38	-1.88679	0.00253905	Antisense
W04A8.6	chrI	+	13853065	13859538	1633	865	-1.88679	2.82e-44	Antisense	Direct
Y32B12B.2	chrV	+	16538367	16549826	178	94	-1.88679	2.81e-06	Antisense	Direct
Y54E2A.6	chrII	+	14758020	14771864	256	135	-1.88679	1.89e-08	Antisense
Y66D12A.15	chrIII	+	11526252	11534467	127	67	-1.88679	6.57e-05	Antisense	Direct
Y74C10AR.1	chrI	+	2485869	2489716	148	78	-1.88679	1.78e-05	Antisense
ZK1098.10	chrIII	+	9546259	9556016	104	55	-1.88679	0.000303283	Antisense
ZK1236.3	chrIII	+	8416145	8422569	39	21	-1.88679	0.0233186	Antisense
C04F5.1	chrV	+	5119954	5126900	460	239	-1.92308	3.01e-14	Antisense	Direct
C05C10.6	chrII	+	9940682	9943918	148	77	-1.92308	1.35e-05	Antisense
C41G7.2	chrI	+	9512442	9514746	1197	622	-1.92308	2.58e-34	Antisense	Direct
D2013.9	chrII	+	9338919	9341142	72	37	-1.92308	0.00191381	Antisense	Direct
F02H6.4	chrIV	+	14216080	14219276	58	30	-1.92308	0.00527354	Antisense	Direct
F18E9.5	chrX	+	8570989	8575383	280	146	-1.92308	3.29e-09	Antisense	Direct
F42A9.1	chrIV	+	8631414	8643986	49	25	-1.92308	0.00952414	Antisense
F55D10.3	chrX	+	4712249	4715049	224	116	-1.92308	8.22e-08	Antisense	Direct
F59G1.3	chrII	+	5907781	5911171	111	58	-1.92308	0.000162095	Antisense
K05C4.6	chrI	+	14739555	14742644	231	121	-1.92308	7.75e-08	Antisense
T04H1.4	chrV	+	12245570	12251223	69	36	-1.92308	0.00237425	Antisense
T24F1.1	chrII	+	11301280	11302371	118	61	-1.92308	8.66e-05	Antisense
T27C4.4	chrV	+	3704981	3712509	275	142	-1.92308	2.84e-09	Antisense	Direct
Y110A7A.1	chrI	+	5165159	5171302	601	315	-1.92308	8.89e-18	Antisense
Y41E3.11	chrIV	+	15042396	15049324	321	167	-1.92308	1.97e-10	Antisense	Direct
Y47G6A.2	chrI	+	3608617	3611705	92	48	-1.92308	0.000496591	Antisense
Y49E10.14	chrIII	+	12426772	12428967	102	53	-1.92308	0.000283298	Antisense
Y82E9BR.1	chrIII	+	1458222	1466722	109	56	-1.92308	0.000150789	Antisense
Y92H12A.2	chrI	+	1543525	1556184	564	292	-1.92308	6.55e-13	Sense	Direct
ZK484.2	chrI	+	6081813	6085964	575	299	-1.92308	2.06e-17	Antisense	Direct
ZK632.5	chrIII	+	9808441	9812536	69	36	-1.92308	0.00237425	Antisense
C10C6.1	chrIV	+	11436617	11447021	157	80	-1.96078	4.44e-06	Antisense
C29E4.2	chrIII	+	7941645	7945522	296	150	-1.96078	3.41e-10	Antisense	Direct
C33E10.2	chrX	+	17302666	17303744	176	90	-1.96078	1.5e-06	Antisense	Direct
C47E8.4	chrV	-	14683746	14685530	39	20	-1.96078	0.0174078	Sense
C50E3.5	chrV	+	7587976	7594719	104	53	-1.96078	0.00017241	Antisense
F23B12.6	chrV	+	14447719	14449421	120	61	-1.96078	5.27e-05	Antisense
F32A5.1	chrII	+	7252198	7255675	226	115	-1.96078	3.8e-08	Antisense
F59E10.1	chrII	+	10873852	10877779	85	44	-1.96078	0.000705727	Antisense
K09B11.2	chrIV	+	13422467	13429314	97	49	-1.96078	0.000243148	Antisense	Direct
K10C3.6	chrI	+	9871217	9874580	150	77	-1.96078	8.27e-06	Antisense
T05E7.3	chrI	+	6188160	6192618	55	28	-1.96078	0.00489283	Antisense
T20B12.1	chrIII	+	7386153	7391061	62	32	-1.96078	0.00340653	Antisense
W01D2.5	chrII	+	14812468	14814778	67	34	-1.96078	0.00220274	Antisense	Direct
Y52B11A.10	chrI	+	11039048	11052465	81	41	-1.96078	0.000808995	Antisense	Direct
C33A12.3	chrIV	-	9511103	9512970	79	39	-2	0.000743629	Sense
C34E10.4	chrIII	+	5236368	5239987	44	22	-2	0.0110463	Antisense
C40H1.1	chrIII	+	9322219	9324807	129	65	-2	2.27e-05	Antisense
C43E11.1	chrI	+	4270697	4273330	155	77	-2	3.04e-06	Antisense
F08B4.1	chrIV	+	8692080	8696425	76	38	-2	0.000923611	Antisense
F10C5.1	chrIII	+	475452	482305	185	92	-2	3.66e-07	Antisense
F18E2.4	chrV	+	12769246	12770824	213	106	-2	5.47e-08	Antisense	Direct
F22F1.1	chrX	+	8159096	8160027	834	417	-2	1.76e-26	Antisense
F28B3.5	chrI	+	4926648	4928743	62	31	-2	0.00252352	Antisense
F31E3.1	chrIII	+	6979819	6981724	952	473	-2	2.45e-30	Antisense
F36A2.10	chrI	-	8819487	8821350	58	29	-2	0.00392222	Sense
F46A9.1	chrI	+	9457807	9458839	60	30	-2	0.00314546	Antisense
F48E8.4	chrIII	+	5453562	5458926	30	15	-2	0.032371	Antisense
F57B10.1	chrI	+	6580238	6584461	46	23	-2	0.00881051	Antisense
F59B2.6	chrIII	+	9002699	9004750	139	69	-2	9.79e-06	Antisense
K04F10.4	chrI	+	6342232	6348475	44	22	-2	0.0110463	Antisense
M176.4	chrII	+	9420401	9421899	62	31	-2	0.00252352	Antisense
R06A10.1	chrI	+	1085969	1088453	30	15	-2	0.032371	Antisense
R07G3.3	chrII	+	7599587	7607945	206	103	-2	1.02e-07	Antisense
R119.6	chrI	+	382835	388540	99	50	-2	0.000196515	Antisense	Direct
T16H12.1	chrIII	+	10083533	10085957	44	22	-2	0.0110463	Antisense	Direct
W02B8.2	chrII	+	13908828	13915095	104	52	-2	0.000128388	Antisense
W05F2.5	chrI	+	3371769	3373833	240	120	-2	8.26e-09	Antisense	Direct
W08E3.3	chrI	+	13340320	13343923	60	30	-2	0.00314546	Antisense
Y113G7B.16	chrV	+	20265494	20271120	58	29	-2	0.00392222	Antisense
Y38C1AA.12	chrIV	+	192264	194737	106	53	-2	0.000103784	Antisense	Direct
Y47G6A.31	chrI	+	3603344	3604429	245	123	-2	7.33e-09	Antisense
Y53F4B.15	chrII	+	15039304	15048806	44	22	-2	0.0110463	Antisense
Y55F3BR.4	chrIV	+	845880	848850	159	79	-2	2e-06	Antisense
Y66D12A.19	chrIII	+	11509007	11509668	173	86	-2	7.69e-07	Antisense
ZK662.4	chrX	+	15726056	15731533	113	57	-2	7.4e-05	Antisense
B0001.6	chrIV	+	12159449	12164077	152	75	-2.04082	2.77e-06	Antisense
C01G10.1	chrV	+	15100309	15104365	37	18	-2.04082	0.0160323	Antisense	Direct
C34E10.1	chrIII	+	5260666	5263594	37	18	-2.04082	0.0160323	Antisense
C47E12.5	chrIV	-	9989638	9995006	55	27	-2.04082	0.00359082	Sense	Direct
C49H3.5	chrIV	+	7910582	7915157	247	122	-2.04082	3.3e-09	Antisense
F02E9.7	chrI	+	8413252	8416122	51	25	-2.04082	0.00561732	Antisense
F09E5.3	chrII	+	5373976	5374994	32	16	-2.04082	0.0255703	Antisense
F11A10.4	chrIV	+	12096748	12105732	226	111	-2.04082	1.17e-08	Antisense
F11A3.2	chrV	+	9513826	9517547	74	36	-2.04082	0.000843141	Antisense
F11C3.1	chrI	+	14867823	14871352	109	53	-2.04082	6.18e-05	Antisense
F19F10.12	chrV	+	7575744	7581453	99	49	-2.04082	0.00014541	Antisense
F25H2.6	chrI	+	10554625	10557620	97	48	-2.04082	0.00018013	Antisense
F28C6.7	chrII	+	8602715	8603512	32	16	-2.04082	0.0495544	Sense
F54D8.6	chrIII	+	5101945	5106914	95	46	-2.04082	0.000163959	Antisense	Direct
F55C9.5	chrV	-	19290628	19290943	377	184	-2.04082	1.93e-13	Sense	Direct
F56D1.1	chrII	+	5478550	5480270	146	72	-2.04082	5.21e-06	Antisense
H06I04.1	chrIII	+	3091836	3100458	74	36	-2.04082	0.000843141	Antisense	Direct
K06A5.4	chrI	+	6460434	6464236	233	115	-2.04082	8.47e-09	Antisense
K12H4.3	chrIII	+	8045960	8047538	81	40	-2.04082	0.00059884	Antisense
R74.5	chrIII	+	4197257	4201798	51	25	-2.04082	0.00561732	Antisense
T06C12.4	chrV	+	15867669	15868913	49	24	-2.04082	0.00703255	Antisense
T19A6.2	chrI	+	8394720	8398614	122	60	-2.04082	2.35e-05	Antisense
T20D3.11	chrIV	-	9343334	9355962	32	16	-2.04082	0.0255703	Sense
T21C12.1	chrIII	+	10520685	10532582	259	126	-2.04082	8.65e-10	Antisense	Direct
W09D6.4	chrIII	+	11079673	11080255	32	16	-2.04082	0.0255703	Antisense
Y108G3AL.2	chrV	+	166993	176762	37	18	-2.04082	0.0160323	Antisense
Y34D9A.3	chrI	+	1034473	1040870	85	42	-2.04082	0.000388574	Antisense	Direct
Y39A1A.13	chrIII	+	10646051	10648743	88	43	-2.04082	0.000313095	Antisense
Y39E4B.5	chrIII	+	13169797	13172984	99	49	-2.04082	0.00014541	Antisense
Y43F4B.7	chrIII	+	13307381	13313271	76	37	-2.04082	0.000677777	Antisense
Y45F10C.6	chrIV	+	13653922	13655819	520	256	-2.04082	1.17e-17	Antisense
Y48G8AL.7	chrI	+	1157570	1162877	81	40	-2.04082	0.00059884	Antisense
Y53G8AL.1	chrIII	+	3233090	3241252	37	18	-2.04082	0.0160323	Antisense
Y56A3A.13	chrIII	+	11923770	11929214	53	26	-2.04082	0.00448982	Antisense
Y57A10A.2	chrII	+	12147717	12150023	65	32	-2.04082	0.0020253	Antisense	Direct
Y67D2.4	chrIII	+	1533827	1538186	37	18	-2.04082	0.0160323	Antisense
Y71G12B.12	chrI	+	1709587	1715569	72	35	-2.04082	0.00104916	Antisense
Y73C8B.4	chrV	+	3188348	3189840	118	58	-2.04082	3.59e-05	Antisense
Y87G2A.7	chrI	+	13572366	13575610	72	35	-2.04082	0.00104916	Antisense
ZC513.4	chrV	+	8031703	8034993	67	33	-2.04082	0.00162603	Antisense
ZK250.5	chrII	-	1937087	1941671	444	217	-2.04082	1.66e-15	Sense	Direct
ZK370.3	chrIII	+	8720107	8725150	132	65	-2.04082	1.36e-05	Antisense	Direct
ZK994.3	chrV	+	8494872	8502138	32	16	-2.04082	0.0255703	Antisense	Direct
B0205.12	chrI	+	10730463	10730666	23	11	-2.08333	0.0482221	Antisense
B0464.5	chrIII	+	9457554	9462161	90	43	-2.08333	0.000183902	Antisense	Direct
C25D7.8	chrV	+	15066273	15067440	65	31	-2.08333	0.00147698	Antisense
C27A12.3	chrI	+	6038407	6041271	23	11	-2.08333	0.0482221	Antisense
C36B1.7	chrI	+	8736211	8736916	23	11	-2.08333	0.0482221	Antisense
C43H8.2	chrI	+	10622940	10624350	85	41	-2.08333	0.000283791	Antisense	Direct
C56E6.1	chrII	+	6532127	6540107	129	62	-2.08333	9.07e-06	Antisense
F09D1.1	chrII	+	2565275	2575904	58	28	-2.08333	0.00287346	Antisense
F13C5.2	chrX	+	593960	596290	635	302	-2.08333	1.19e-22	Antisense	Direct
F48F5.5	chrV	+	20420688	20426725	97	47	-2.08333	0.0001322	Antisense
F53F1.2	chrV	+	13406897	13408167	62	30	-2.08333	0.00184293	Antisense
F56C9.6	chrIII	-	7308924	7310697	23	11	-2.08333	0.0482221	Sense	Direct
R07H5.1	chrIV	+	11183109	11184066	46	22	-2.08333	0.0063988	Antisense
R13A5.1	chrIII	+	7584261	7591499	65	31	-2.08333	0.00147698	Antisense
T04D1.3	chrI	+	4675135	4679391	46	22	-2.08333	0.0063988	Antisense
T07A9.10	chrIV	+	390511	393158	118	56	-2.08333	1.92e-05	Antisense
T07F10.5	chrV	+	12865892	12866525	23	11	-2.08333	0.0482221	Antisense
T14B4.3	chrII	+	6734846	6736037	46	22	-2.08333	0.0063988	Antisense
T25D3.4	chrII	+	147272	152701	69	33	-2.08333	0.000949888	Antisense
W08A12.1	chrV	+	3687107	3701328	118	57	-2.08333	2.63e-05	Antisense
Y105E8A.24	chrI	-	14567318	14580966	23	11	-2.08333	0.0482221	Sense
Y37D8A.10	chrIII	+	12874886	12875663	92	44	-2.08333	0.00014809	Antisense
Y39G10AL.1	chrI	+	2279834	2280868	39	19	-2.08333	0.0127212	Antisense
Y39G10AR.2	chrI	+	2402232	2409986	217	105	-2.08333	1.46e-08	Antisense
Y47A7.1	chrV	+	5204464	5213405	289	140	-2.08333	7.92e-11	Antisense
Y57G7A.2	chrII	+	1296083	1296752	42	20	-2.08333	0.0101062	Antisense
Y79H2A.4	chrIII	+	12040700	12041972	936	445	-2.08333	1.74e-32	Antisense
Y81G3A.3	chrII	+	13084076	13091394	610	294	-2.08333	2.9e-21	Antisense
ZC477.2	chrIV	+	7108204	7109896	23	11	-2.08333	0.0482221	Antisense
ZK652.6	chrIII	+	7829335	7832420	252	121	-2.08333	8.7e-10	Antisense
ZK945.3	chrII	+	10100231	10102981	215	103	-2.08333	1.31e-08	Antisense	Direct
B0035.5	chrIV	+	11317391	11319748	120	57	-2.12766	1.55e-05	Antisense
B0432.2	chrII	+	290578	291845	53	25	-2.12766	0.0032455	Antisense
B0491.1	chrII	+	11348346	11349863	136	64	-2.12766	3.47e-06	Antisense
C05B10.1	chrIV	+	6842947	6844810	28	13	-2.12766	0.0295921	Antisense
C07G1.3	chrIV	+	8176465	8188861	201	95	-2.12766	2.45e-08	Antisense	Direct
C27H5.3	chrII	+	7152639	7155223	356	166	-2.12766	7.39e-14	Antisense	Direct
D1054.3	chrV	+	10771425	10772807	51	24	-2.12766	0.0114921	Sense	Direct
E02H1.8	chrII	+	9597545	9598122	28	13	-2.12766	0.0295921	Antisense
F08H9.2	chrV	+	14460603	14461110	25	12	-2.12766	0.0377194	Antisense
F12F6.5	chrIV	+	11570481	11578669	83	39	-2.12766	0.00025493	Antisense
F36A2.3	chrI	+	8798777	8801650	53	25	-2.12766	0.0032455	Antisense
F39B2.2	chrI	+	14790257	14790784	72	34	-2.12766	0.000762226	Antisense
F53F4.3	chrV	+	13592114	13592960	25	12	-2.12766	0.0377194	Antisense
F54D10.3	chrII	+	3812298	3813339	173	81	-2.12766	1.61e-07	Antisense	Direct
F56A3.1	chrI	+	5190150	5195181	104	49	-2.12766	5.03e-05	Antisense
R01H10.8	chrIII	+	10271150	10278473	58	27	-2.12766	0.0020718	Antisense	Direct
R11H6.2	chrV	+	14598045	14599902	76	36	-2.12766	0.000491345	Antisense
T12B5.3	chrIII	+	952530	953790	53	25	-2.12766	0.0032455	Antisense
T13H5.3	chrII	+	8520841	8523402	30	14	-2.12766	0.0232752	Antisense
W09B6.2	chrII	+	1127981	1132353	72	34	-2.12766	0.000762226	Antisense	Direct
Y42G9A.1	chrIII	+	6149926	6154878	127	60	-2.12766	8.15e-06	Antisense
Y43F8C.9	chrV	+	19646054	19647303	638	298	-2.12766	1.96e-23	Antisense
Y48A5A.1	chrIV	+	1965479	1969625	76	36	-2.12766	0.000491345	Antisense
Y53F4B.21	chrII	+	15090081	15108910	88	41	-2.12766	0.000164849	Antisense
Y60A9.3	chrX	+	14383171	14383783	49	23	-2.12766	0.00509882	Antisense
Y69A2AR.6	chrIV	+	2608057	2610200	99	47	-2.12766	7.74e-05	Antisense
ZK1098.4	chrIII	+	9542992	9544309	55	26	-2.12766	0.00259221	Antisense
ZK1236.1	chrIII	+	8429254	8431465	58	27	-2.12766	0.0020718	Antisense
ZK973.1	chrI	+	4382565	4385219	83	39	-2.12766	0.00025493	Antisense
C01G5.8	chrIV	+	6548897	6552484	192	88	-2.17391	2.13e-08	Antisense
C16A3.2	chrIII	+	6389774	6390591	32	15	-2.17391	0.0183472	Antisense
C26E6.1	chrIII	+	4956851	4957500	32	15	-2.17391	0.0183472	Antisense
C26E6.6	chrIII	+	4935540	4937168	127	58	-2.17391	4.2e-06	Antisense
C34E10.11	chrIII	+	5234576	5236325	104	48	-2.17391	3.61e-05	Antisense
C55B7.5	chrI	+	6494291	6496111	35	16	-2.17391	0.0144907	Antisense	Direct
D1046.1	chrIV	+	8926321	8929011	69	32	-2.17391	0.0028061	Sense	Direct
F18A1.4	chrII	+	7667919	7671832	42	19	-2.17391	0.00720761	Antisense	Direct
F21A3.5	chrV	+	15538231	15542889	83	38	-2.17391	0.000182115	Antisense
F26E4.10	chrI	-	9781315	9785712	35	16	-2.17391	0.0144907	Sense
F36H12.2	chrIV	+	5274664	5276086	35	16	-2.17391	0.0144907	Antisense
F46F11.1	chrI	+	5627821	5637621	67	31	-2.17391	0.000850323	Antisense
F49F1.12	chrIV	-	4141735	4143012	32	15	-2.17391	0.0183472	Sense
F56A8.4	chrIII	+	13263166	13264850	32	15	-2.17391	0.0183472	Antisense
F58A4.9	chrIII	-	9629149	9629818	39	18	-2.17391	0.00908396	Sense
F59G1.8	chrII	+	5906523	5907509	76	35	-2.17391	0.000351687	Antisense
K02F2.3	chrI	+	6814528	6820547	162	74	-2.17391	2.4e-07	Antisense
K06A5.4	chrI	+	6460434	6464236	32	15	-2.17391	0.0365483	Sense
T01C3.3	chrV	-	14991684	14992653	74	34	-2.17391	0.000438271	Sense
T01H3.4	chrII	+	7880751	7882454	236	108	-2.17391	5.42e-10	Antisense	Direct
T22A3.8	chrI	+	10608454	10621417	74	34	-2.17391	0.000438271	Antisense	Direct
T28D6.6	chrIII	-	11326535	11342989	42	19	-2.17391	0.00720761	Sense
W03B1.4	chrIV	+	4357628	4359869	35	16	-2.17391	0.0144907	Antisense
W03C9.6	chrII	+	11954432	11960498	76	35	-2.17391	0.000351687	Antisense
W03F11.5	chrI	+	2216100	2219418	39	18	-2.17391	0.00908396	Antisense
W09C3.4	chrI	+	4704622	4705803	83	38	-2.17391	0.000182115	Antisense
Y22D7AL.7	chrIII	+	1576745	1580784	245	113	-2.17391	3.26e-10	Antisense
Y37E11AM.1	chrIV	+	3726414	3735490	116	53	-2.17391	1.23e-05	Antisense
Y39E4B.1	chrIII	+	13153696	13160137	106	49	-2.17391	2.91e-05	Antisense	Direct
Y41C4A.18	chrIII	+	11730587	11731161	85	39	-2.17391	0.000146341	Antisense
Y48G1A.3	chrI	+	332613	337816	74	34	-2.17391	0.000438271	Antisense
Y48G9A.4	chrIII	+	2134462	2151527	37	17	-2.17391	0.0251141	Sense	Direct
Y50D7A.3	chrIII	+	254533	264395	67	31	-2.17391	0.000850323	Antisense
Y53F4B.5	chrII	-	14982493	14983911	157	72	-2.17391	3.67e-07	Sense
Y75B8A.33	chrIII	-	12361738	12367253	37	17	-2.17391	0.0114644	Sense
ZC376.7	chrV	+	14193662	14197399	32	15	-2.17391	0.0183472	Antisense
ZK1067.8	chrII	+	9213622	9214341	132	61	-2.17391	3.83e-06	Antisense	Direct
B0391.10	chrV	+	15585669	15592963	49	22	-2.22222	0.0100636	Sense
C03H5.3	chrII	+	386192	387919	51	23	-2.22222	0.00288884	Antisense
C09G1.3	chrX	+	15986081	15987513	284	128	-2.22222	4.68e-12	Antisense
C16A11.2	chrII	+	4238166	4244823	65	29	-2.22222	0.000751313	Antisense
C47D12.6	chrII	-	11691242	11695573	104	47	-2.22222	2.57e-05	Sense	Direct
F27D4.4	chrI	+	7725011	7727107	139	62	-2.22222	1.02e-06	Antisense
F28B3.1	chrI	+	4943630	4949329	95	43	-2.22222	6.12e-05	Antisense
F52A8.6	chrI	+	7347361	7350385	53	24	-2.22222	0.00230393	Antisense
F54C8.2	chrIII	+	9433974	9434997	60	27	-2.22222	0.00117394	Antisense	Direct
K07H8.3	chrIV	+	8290254	8291472	76	34	-2.22222	0.000248399	Antisense
R02D5.1	chrV	+	14508230	14509620	127	57	-2.22222	2.98e-06	Antisense	Direct
T16G1.11	chrV	+	12953980	12955206	72	32	-2.22222	0.000386207	Antisense
Y16E11A.1	chrII	+	1987285	1990536	69	31	-2.22222	0.000481883	Antisense	Direct
Y49F6C.4	chrII	+	3375137	3376709	92	42	-2.22222	7.61e-05	Antisense	Direct
ZC53.6	chrX	+	1917463	1919704	326	147	-2.22222	1.52e-13	Antisense	Direct
ZK1127.5	chrII	+	7050610	7051928	139	63	-2.22222	1.44e-06	Antisense
ZK632.11	chrIII	+	9827812	9829614	51	23	-2.22222	0.00288884	Antisense
C04G2.6	chrIV	+	10097179	10106528	120	53	-2.27273	3.99e-06	Antisense	Direct
F53F4.14	chrV	+	13627640	13629679	148	65	-2.27273	3.04e-07	Antisense
T02G5.7	chrII	+	7075552	7077127	99	44	-2.27273	2.79e-05	Antisense
Y61A9LA.12	chrV	+	4553857	4554484	261	114	-2.27273	9.46e-12	Antisense
Y71A12B.11	chrI	+	13978416	13980110	152	67	-2.27273	1.98e-07	Antisense	Direct
B0273.2	chrIV	+	5486734	5489959	25	11	-2.32558	0.0262967	Antisense	Direct
B0336.5	chrIII	+	5692866	5693889	60	26	-2.32558	0.0008175	Antisense
C05C10.5	chrII	+	9939075	9940263	74	32	-2.32558	0.00021569	Antisense	Direct
C09H10.6	chrII	+	11106545	11107995	81	35	-2.32558	0.00011147	Antisense
C11D2.3	chrIV	+	6154089	6154607	32	14	-2.32558	0.01278	Antisense
C18E3.1	chrI	+	4212743	4214263	28	12	-2.32558	0.0383768	Sense
C30C11.1	chrIII	+	8449673	8450427	90	39	-2.32558	4.65e-05	Antisense	Direct
C32D5.10	chrII	-	6349161	6351938	30	13	-2.32558	0.0162159	Sense
C32F10.1	chrI	+	5829393	5834643	25	11	-2.32558	0.0466351	Sense
C34E10.3	chrIII	+	5254428	5258881	353	153	-2.32558	1.49e-15	Antisense
C42C1.10	chrIV	+	12283168	12284868	23	10	-2.32558	0.0336366	Antisense
D2045.9	chrIII	+	10475855	10479671	92	40	-2.32558	3.74e-05	Antisense
F10E7.5	chrII	+	7111916	7112903	85	37	-2.32558	7.19e-05	Antisense
F21G4.5	chrX	+	9906089	9907739	28	12	-2.32558	0.0206226	Antisense
F26G5.1	chrV	+	4975470	4977485	25	11	-2.32558	0.0262967	Antisense
F36A2.11	chrI	+	8822280	8823599	30	13	-2.32558	0.0162159	Antisense
F36H12.5	chrIV	+	5266854	5267557	21	9	-2.32558	0.0431858	Antisense
F38B7.5	chrV	+	11554779	11558101	28	12	-2.32558	0.0383768	Sense	Direct
F47G6.4	chrI	+	1446666	1465341	42	18	-2.32558	0.00501879	Antisense
F48C1.2	chrI	+	5319733	5321070	44	19	-2.32558	0.00398693	Antisense
F48E8.2	chrIII	+	5464354	5467930	90	39	-2.32558	4.65e-05	Antisense
F54E7.2	chrIII	+	5679280	5680099	62	27	-2.32558	0.00248302	Sense	Direct
F55G1.10	chrIV	-	7485731	7486201	32	14	-2.32558	0.01278	Sense	Direct
F56C11.4	chrI	+	183363	184210	32	14	-2.32558	0.01278	Antisense
F58A4.1	chrIII	+	9598375	9599950	62	27	-2.32558	0.000653828	Antisense
F59G1.5	chrII	+	5918677	5920934	148	64	-2.32558	2.12e-07	Antisense
H20J04.6	chrII	+	4323253	4324181	85	37	-2.32558	7.19e-05	Antisense
H24K24.3	chrV	+	911775	916316	32	14	-2.32558	0.01278	Antisense
K05F1.3	chrII	+	5794474	5796106	30	13	-2.32558	0.0316608	Sense
K09B11.9	chrIV	-	13445999	13454766	21	9	-2.32558	0.0431858	Sense	Direct
K10G6.1	chrII	+	3982566	3986958	23	10	-2.32558	0.0336366	Antisense
R05D3.7	chrIII	-	8351167	8355093	39	17	-2.32558	0.0063256	Sense	Direct
T02G5.14	chrII	+	7089588	7092213	21	9	-2.32558	0.0431858	Antisense
T04C12.5	chrV	-	11076719	11078131	23	10	-2.32558	0.0336366	Sense
T13F2.1	chrIV	+	9799444	9802046	28	12	-2.32558	0.0206226	Antisense
T16G12.4	chrIII	+	10057738	10058570	213	91	-2.32558	3.84e-10	Antisense
T21C9.13	chrV	+	10597288	10598638	49	21	-2.32558	0.00252431	Antisense
T22B3.2	chrIV	+	11704334	11708207	28	12	-2.32558	0.0383768	Sense
T26A8.1	chrIV	+	8433123	8437553	99	43	-2.32558	1.95e-05	Antisense
T27E9.4	chrIII	+	13466457	13471228	67	29	-2.32558	0.000418947	Antisense
T28F12.2	chrV	+	4497448	4511429	51	22	-2.32558	0.00201151	Antisense
W02G9.3	chrV	+	2671462	2673972	81	35	-2.32558	0.00011147	Antisense
W04C9.1	chrI	+	489986	496156	453	195	-2.32558	1.3e-19	Antisense
W05H9.2	chrX	+	6267007	6271010	25	11	-2.32558	0.0262967	Antisense
Y102A11A.3	chrX	+	2019165	2025732	28	12	-2.32558	0.0206226	Antisense
Y17G7B.12	chrII	+	12023775	12025790	32	14	-2.32558	0.01278	Antisense
Y19D2B.2	chrII	+	10923637	10924517	67	29	-2.32558	0.000418947	Antisense
Y32F6A.6	chrV	+	10447852	10449103	229	98	-2.32558	8.76e-11	Antisense
Y41C4A.4	chrIII	+	11674542	11693715	23	10	-2.32558	0.0336366	Antisense	Direct
Y41D4B.11	chrIV	+	1605709	1608890	25	11	-2.32558	0.0262967	Antisense
Y45F3A.3	chrIII	+	10566080	10571488	28	12	-2.32558	0.0206226	Antisense
Y71F9AM.4	chrI	+	2931461	2947153	53	23	-2.32558	0.00504202	Sense
ZK863.6	chrV	+	12191514	12191965	37	16	-2.32558	0.00798376	Antisense
ZK909.4	chrI	+	14961508	14965342	25	11	-2.32558	0.0262967	Antisense	Direct
C17G10.2	chrII	+	5594707	5596329	62	26	-2.38095	0.000447353	Antisense
C49C3.6	chrIV	+	17331481	17332395	72	30	-2.38095	0.000184478	Antisense
F25H9.5	chrV	+	13463258	13466926	58	24	-2.38095	0.000698802	Antisense
F53A2.8	chrIII	+	13346964	13355340	65	27	-2.38095	0.000358227	Antisense	Direct
F56C9.3	chrIII	+	7311223	7313036	141	59	-2.38095	1.91e-07	Antisense
F59C6.4	chrI	+	10518369	10519150	129	54	-2.38095	5.57e-07	Antisense
H27A22.1	chrV	+	10602431	10605542	60	25	-2.38095	0.000558955	Antisense
H43I07.2	chrV	+	4199470	4203660	76	32	-2.38095	0.000118777	Antisense
K06H7.3	chrIII	+	8088465	8091399	81	34	-2.38095	7.66e-05	Antisense
T04A8.7	chrIII	+	4695324	4697972	58	24	-2.38095	0.000698802	Antisense
T06E4.1	chrV	+	9645812	9650270	72	30	-2.38095	0.000872581	Sense
T22C1.10	chrI	+	7962058	7972420	106	45	-2.38095	7e-06	Antisense	Direct
Y66D12A.3	chrIII	+	11589760	11592709	90	38	-2.38095	0.000220598	Sense	Direct
B0303.2	chrIII	+	8684714	8686388	707	293	-2.43902	1.7e-31	Antisense	Direct
C18A3.2	chrII	+	5718113	5719956	42	17	-2.43902	0.00340497	Antisense
C23H3.4	chrII	+	51071	57576	81	33	-2.43902	5.19e-05	Antisense
C45G9.2	chrIII	+	5069029	5070379	39	16	-2.43902	0.00428556	Antisense	Direct
D2096.4	chrIV	+	8361104	8362987	49	20	-2.43902	0.00171863	Antisense
F23B2.6	chrIV	+	9147450	9148562	42	17	-2.43902	0.00340497	Antisense
F32D8.5	chrV	+	10894828	10895929	44	18	-2.43902	0.00270836	Antisense
F33C8.1	chrX	+	14710394	14718699	83	34	-2.43902	4.17e-05	Antisense	Direct
F41H10.4	chrIV	+	5364548	5366569	116	47	-2.43902	1.36e-06	Antisense
F42G8.3	chrIV	+	8143480	8148621	360	146	-2.43902	1.82e-17	Antisense
F54D5.2	chrII	+	11573121	11574833	42	17	-2.43902	0.00340497	Antisense
K01C8.10	chrII	+	8283599	8285413	129	53	-2.43902	3.78e-07	Antisense
K04G7.1	chrIII	+	7162640	7164864	79	32	-2.43902	6.45e-05	Antisense
K06A5.1	chrI	+	6474060	6476729	111	46	-2.43902	3.1e-06	Antisense
K06H7.6	chrIII	+	8080538	8083622	49	20	-2.43902	0.00171863	Antisense	Direct
R11D1.10	chrV	+	12729498	12731773	46	19	-2.43902	0.00215647	Antisense
R148.4	chrIII	+	3171655	3172720	37	15	-2.43902	0.0054006	Antisense
T02G5.4	chrII	+	7082040	7084328	390	159	-2.43902	1.22e-18	Antisense
T07G12.10	chrIV	+	10555620	10558193	37	15	-2.43902	0.0054006	Antisense
Y111B2A.12	chrIII	+	12609168	12617941	46	19	-2.43902	0.00215647	Antisense	Direct
Y40D12A.1	chrIII	+	6615353	6619988	49	20	-2.43902	0.00171863	Antisense
Y41D4A.3	chrIV	+	1754752	1755749	37	15	-2.43902	0.0054006	Antisense	Direct
Y51H4A.15	chrIV	+	16656276	16657317	53	22	-2.43902	0.00109431	Antisense
Y66H1A.4	chrIV	+	426169	426952	76	31	-2.43902	8.03e-05	Antisense
Y76A2B.5	chrIII	-	13546768	13548885	404	165	-2.43902	3.49e-19	Sense
ZC328.4	chrI	+	6407519	6409061	46	19	-2.43902	0.00215647	Antisense
ZC477.3	chrIV	+	7103544	7105076	46	19	-2.43902	0.00215647	Antisense
C02F5.6	chrIII	+	8232577	8234454	58	23	-2.5	0.000467887	Antisense
C27H6.3	chrV	+	9981256	9982736	122	49	-2.5	4.81e-07	Antisense	Direct
C29G2.1	chrV	+	2591174	2591757	35	14	-2.5	0.00681517	Antisense
C30G12.1	chrII	+	7299510	7301430	367	148	-2.5	6.56e-18	Antisense
E02H1.6	chrII	+	9596621	9597449	55	22	-2.5	0.000584349	Antisense
F13G3.7	chrI	+	7304915	7307011	176	70	-2.5	1.64e-09	Antisense
F31A9.4	chrX	+	1779433	1780523	550	222	-2.5	6.95e-26	Antisense	Direct
F56E10.1	chrV	+	104829	105964	28	11	-2.5	0.0138355	Antisense
R11G10.3	chrV	+	13523510	13529639	60	24	-2.5	0.000374823	Antisense
T17A3.2	chrIII	+	134492	137964	35	14	-2.5	0.00681517	Antisense
W06E11.2	chrIII	+	640790	641537	28	11	-2.5	0.0138355	Antisense
Y48C3A.1	chrII	+	13260402	13261109	55	22	-2.5	0.000584349	Antisense
Y49F6C.5	chrII	+	3371304	3372140	113	45	-2.5	1.13e-06	Antisense	Direct
Y50D7A.9	chrIII	+	284115	289426	30	12	-2.5	0.0109058	Antisense
Y71A12B.4	chrI	+	13902202	13913841	215	86	-2.5	3.09e-11	Antisense
Y75B12B.1	chrV	+	15184681	15185782	35	14	-2.5	0.00681517	Antisense
ZK353.1	chrIII	+	8405792	8409321	58	23	-2.5	0.000467887	Antisense
ZK643.1	chrIII	+	8934144	8935328	55	22	-2.5	0.000584349	Antisense
B0205.5	chrI	+	10740206	10740579	44	17	-2.5641	0.00179116	Antisense	Direct
B0336.1	chrIII	+	5722799	5727065	23	9	-2.5641	0.0389318	Sense
F13E9.1	chrIV	+	10864301	10873601	104	41	-2.5641	2.66e-06	Antisense
F16D3.7	chrI	+	8384972	8386666	65	25	-2.5641	0.00015891	Antisense
F23C8.1	chrI	+	2446763	2448346	79	31	-2.5641	4.3e-05	Antisense
F33H2.3	chrI	+	15034503	15035454	49	19	-2.5641	0.00114214	Antisense
F35D11.4	chrII	+	4603421	4604054	25	10	-2.5641	0.0175926	Antisense
K07C5.2	chrV	+	10339471	10340931	88	34	-2.5641	1.19e-05	Antisense
M03F8.2	chrV	+	5944404	5950974	44	17	-2.5641	0.00179116	Antisense
R05D11.6	chrI	+	8596325	8598544	74	29	-2.5641	6.64e-05	Antisense
R102.3	chrIV	+	10690456	10691641	51	20	-2.5641	0.000912947	Antisense
R10E11.3	chrIII	+	9776430	9778748	72	28	-2.5641	8.26e-05	Antisense
R144.9	chrIII	+	5021188	5021859	118	46	-2.5641	4.89e-07	Antisense	Direct
R166.5	chrII	-	10542365	10548831	605	234	-2.5641	3.75e-30	Sense	Direct
T23D8.1	chrI	+	9965576	9969402	67	26	-2.5641	0.00012772	Antisense
Y106G6H.7	chrI	+	10446667	10452062	192	75	-2.5641	1.67e-10	Antisense
Y41D4B.27	chrIV	+	1627111	1630752	118	46	-2.5641	4.89e-07	Antisense
Y49F6B.1	chrII	+	3505011	3509609	23	9	-2.5641	0.02243	Antisense
Y62E10A.8	chrIV	+	13377992	13380293	49	19	-2.5641	0.00114214	Antisense
ZK863.7	chrV	+	12192251	12194343	25	10	-2.5641	0.0175926	Antisense
C06G3.7	chrIV	+	7011986	7016526	39	15	-2.63158	0.00281744	Antisense
C15H11.3	chrV	-	14412382	14415770	35	13	-2.63158	0.00444721	Sense	Direct
C34D4.4	chrIV	+	7149319	7150662	58	22	-2.63158	0.000306594	Antisense
C44C1.1	chrX	+	980773	983024	109	41	-2.63158	7.45e-07	Antisense	Direct
C50E10.4	chrII	+	12339858	12344680	18	7	-2.63158	0.0368315	Antisense
F08B4.2	chrIV	+	8669123	8677956	21	8	-2.63158	0.028688	Antisense
F16B4.5	chrV	+	1589327	1591758	104	40	-2.63158	1.75e-06	Antisense
F21D5.5	chrIV	-	8735675	8739376	83	32	-2.63158	1.83e-05	Sense
F35G12.12	chrIII	+	4581761	4583707	21	8	-2.63158	0.028688	Antisense
F39H2.3	chrI	+	8664968	8666227	60	23	-2.63158	0.000246208	Antisense
F53E10.6	chrV	-	2602241	2603059	21	8	-2.63158	0.028688	Sense	Direct
F54D11.4	chrV	+	4616167	4617746	74	28	-2.63158	4.34e-05	Antisense	Direct
F58B3.4	chrIV	-	11628726	11631811	21	8	-2.63158	0.028688	Sense
K03E5.1	chrI	+	3429604	3433094	106	40	-2.63158	9.19e-07	Antisense	Direct
K08B4.5	chrIV	-	6086332	6089387	21	8	-2.63158	0.028688	Sense	Direct
M03A8.2	chrX	+	6809058	6817169	18	7	-2.63158	0.0368315	Antisense
R06C7.4	chrI	+	7244990	7246015	35	13	-2.63158	0.00444721	Antisense
R144.2	chrIII	+	5025331	5026993	18	7	-2.63158	0.0368315	Antisense
T02G5.8	chrII	+	7073753	7075348	18	7	-2.63158	0.0368315	Antisense
T09F3.2	chrII	+	10391281	10393016	53	20	-2.63158	0.000475857	Antisense
T12D8.8	chrIII	-	13614740	13622103	21	8	-2.63158	0.028688	Sense
T21B10.1	chrII	+	8929760	8930857	74	28	-2.63158	4.34e-05	Antisense
T23G11.1	chrI	-	7701411	7702030	21	8	-2.63158	0.028688	Sense
W06D4.3	chrI	+	9058880	9060446	21	8	-2.63158	0.028688	Antisense
Y105C5B.18	chrIV	+	15964601	15965641	35	13	-2.63158	0.0101165	Sense
Y23H5B.3	chrI	+	2544773	2546154	35	13	-2.63158	0.00444721	Antisense	Direct
Y39E4B.8	chrIII	+	13119696	13133756	72	27	-2.63158	5.38e-05	Antisense	Direct
Y54E2A.11	chrII	+	14795311	14798345	35	13	-2.63158	0.0101165	Sense	Direct
Y71H2B.11	chrIII	+	2605218	2606489	367	141	-2.63158	3.72e-19	Antisense	Direct
Y75B8A.31	chrIII	+	12351519	12354798	35	13	-2.63158	0.00444721	Antisense
ZK546.2	chrII	+	4946010	4948056	76	29	-2.63158	3.5e-05	Antisense
C04F6.1	chrX	+	3403468	3408543	32	12	-2.7027	0.0121287	Sense
C47B2.8	chrI	+	12971602	12972247	49	18	-2.7027	0.000739468	Antisense
C50F7.4	chrIV	+	7728902	7730628	46	17	-2.7027	0.00092223	Antisense
F28B3.4	chrI	+	4934118	4940510	51	19	-2.7027	0.000593104	Antisense
F35C11.5	chrII	+	8253198	8255200	141	52	-2.7027	1.06e-08	Antisense
F40F4.3	chrX	+	3259147	3259743	32	12	-2.7027	0.00559563	Antisense
F49E12.4	chrII	+	8405533	8406785	668	250	-2.7027	4.31e-28	Sense
F56H1.6	chrI	+	5744186	5745522	30	11	-2.7027	0.00704831	Antisense
M01E11.4	chrI	-	5566353	5570082	16	6	-2.7027	0.047507	Sense
T25G12.4	chrX	+	17222390	17224428	30	11	-2.7027	0.00704831	Antisense
Y38F2AR.3	chrIV	+	2384008	2387919	32	12	-2.7027	0.00559563	Antisense
Y39G10AR.11	chrI	+	2293217	2296602	62	23	-2.7027	0.000127486	Antisense
Y39G10AR.15	chrI	-	2322076	2327253	32	12	-2.7027	0.00559563	Sense
Y53H1A.2	chrI	+	11222390	11224154	30	11	-2.7027	0.00704831	Antisense
Y57G11C.43	chrIV	+	14769535	14770658	65	24	-2.7027	0.000102737	Antisense
ZC155.1	chrIII	+	5225582	5226604	51	19	-2.7027	0.000593104	Antisense
B0212.3	chrIV	+	3540183	3543598	39	14	-2.77778	0.00179196	Antisense	Direct
C32B5.6	chrII	+	968411	970525	626	226	-2.77778	3.65e-34	Antisense	Direct
C33H5.7	chrIV	+	7774430	7775937	55	20	-2.77778	0.00024364	Antisense
C38D4.9	chrIII	+	4802970	4804714	28	10	-2.77778	0.00888857	Antisense
D1007.10	chrI	+	4586273	4589392	55	20	-2.77778	0.00024364	Antisense
D2030.9	chrI	+	7597064	7601898	42	15	-2.77778	0.00143567	Antisense
F01F1.5	chrIII	+	5859583	5861763	42	15	-2.77778	0.00143567	Antisense
F59H6.12	chrII	+	2032493	2033218	39	14	-2.77778	0.00179196	Antisense
H43I07.3	chrV	+	4195601	4199362	81	29	-2.77778	9.32e-06	Antisense
K10D3.3	chrI	+	7132496	7134308	55	20	-2.77778	0.00024364	Antisense
R05D3.1	chrIII	+	8381634	8387418	65	23	-2.77778	6.5e-05	Antisense
R11G11.2	chrV	+	532289	534041	55	20	-2.77778	0.00024364	Antisense
T09F3.4	chrII	+	10395658	10396659	42	15	-2.77778	0.00143567	Antisense
Y104H12D.4	chrIV	+	1182591	1186604	72	26	-2.77778	3.44e-05	Antisense
Y111B2A.17	chrIII	+	12673556	12686110	28	10	-2.77778	0.017484	Sense
Y39B6A.39	chrV	+	18981282	18985834	92	33	-2.77778	2.06e-06	Antisense
Y48C3A.20	chrII	+	13369514	13375198	55	20	-2.77778	0.00024364	Antisense
Y57A10A.8	chrII	+	12164753	12170677	53	19	-2.77778	0.000302339	Antisense
Y60A3A.8	chrV	+	19945383	19950380	39	14	-2.77778	0.00179196	Antisense
Y95B8A.4	chrI	+	907465	911135	42	15	-2.77778	0.00388534	Sense	Direct
Y95D11A.3	chrI	+	10940677	10942897	39	14	-2.77778	0.00179196	Antisense
ZK1127.11	chrII	-	7064990	7069905	39	14	-2.77778	0.00179196	Sense
B0205.10	chrI	+	10708821	10710326	37	13	-2.85714	0.00549796	Sense
B0496.1	chrIV	+	7446373	7447403	37	13	-2.85714	0.00223712	Antisense
C05D2.6	chrIII	-	5600390	5603610	25	9	-2.85714	0.0112234	Sense
C27B7.5	chrIV	+	8901626	8903154	23	8	-2.85714	0.02531	Sense
C37C3.1	chrV	+	7857943	7859890	37	13	-2.85714	0.00223712	Antisense
C39F7.5	chrV	+	1264774	1270106	25	9	-2.85714	0.0112234	Antisense
C47D12.2	chrII	+	11676221	11679111	58	20	-2.85714	0.000493175	Sense
D1022.7	chrII	-	7472668	7478474	25	9	-2.85714	0.0112234	Sense	Direct
F10B5.5	chrII	+	8158278	8159852	51	18	-2.85714	0.000375146	Antisense
F30A10.8	chrI	+	9501312	9504556	49	17	-2.85714	0.000465417	Antisense
F34D10.8	chrIII	+	3730807	3731200	23	8	-2.85714	0.02531	Sense
JC8.11	chrIV	+	13228287	13232030	25	9	-2.85714	0.0210248	Sense
K02E2.7	chrV	-	20380156	20380744	37	13	-2.85714	0.00223712	Sense
R05F9.6	chrII	+	4889423	4891416	127	45	-2.85714	2.32e-08	Antisense
T09A5.9	chrII	+	7858349	7859608	23	8	-2.85714	0.0141903	Antisense
T13H5.7	chrII	+	8517080	8518343	76	27	-2.85714	1.42e-05	Antisense
T22D1.5	chrIV	+	6903961	6905383	219	76	-2.85714	1.05e-13	Antisense
T23B12.1	chrV	+	8469017	8470017	25	9	-2.85714	0.0112234	Antisense
Y37E3.4	chrI	+	2064977	2065483	35	12	-2.85714	0.00279321	Antisense
Y54E10A.7	chrI	+	3162813	3163650	35	12	-2.85714	0.00279321	Antisense
Y71H2B.3	chrIII	+	2619924	2623038	62	22	-2.85714	8.04e-05	Antisense
Y73B6BL.3	chrIV	+	6416550	6417441	58	20	-2.85714	0.000122659	Antisense
ZC395.6	chrIII	+	5265071	5267102	23	8	-2.85714	0.0141903	Antisense
ZK1127.3	chrII	+	7055230	7056044	49	17	-2.85714	0.000465417	Antisense
ZK673.5	chrII	+	10461391	10461868	58	20	-2.85714	0.000122659	Antisense
B0361.4	chrIII	+	7258939	7268391	102	35	-2.94118	3.51e-07	Antisense
C06A8.3	chrII	+	7790489	7791499	32	11	-2.94118	0.00348759	Antisense
C14B1.4	chrIII	+	3705243	3706764	104	35	-2.94118	1.76e-07	Antisense
C14B1.9	chrIII	-	3724199	3726479	21	7	-2.94118	0.0179658	Sense
C25D7.16	chrV	+	15056264	15056700	21	7	-2.94118	0.0305009	Sense	Direct
C36C9.1	chrX	+	1682951	1686379	32	11	-2.94118	0.00348759	Antisense
F09G2.1	chrV	+	7200239	7205590	143	48	-2.94118	8.23e-10	Antisense
F21F3.4	chrI	+	4896003	4897542	21	7	-2.94118	0.0179658	Antisense
F45C12.2	chrII	+	1732278	1733201	72	24	-2.94118	1.32e-05	Antisense
F56B3.9	chrIV	+	771602	772797	44	15	-2.94118	0.00209394	Sense
R05C11.3	chrIV	+	2084032	2091921	42	14	-2.94118	0.000887126	Antisense
T04D1.4	chrI	-	4685873	4698576	21	7	-2.94118	0.0179658	Sense
T23C6.1	chrX	+	17151437	17154463	21	7	-2.94118	0.0179658	Antisense
T28F3.4	chrIV	-	17288291	17291599	21	7	-2.94118	0.0179658	Sense
Y37D8A.2	chrIII	+	12820020	12825531	21	7	-2.94118	0.0305009	Sense	Direct
Y45F10A.3	chrIV	+	13512113	13513363	42	14	-2.94118	0.000887126	Antisense	Direct
Y52B11A.10	chrI	+	11039048	11052465	21	7	-2.94118	0.0305009	Sense	Direct
C24A1.2	chrIII	+	688732	715834	171	57	-3.0303	1.75e-11	Antisense	Direct
F01G4.2	chrIV	+	11131248	11133756	30	10	-3.0303	0.00435391	Antisense
F10E9.3	chrIII	+	8310926	8312304	30	10	-3.0303	0.00435391	Antisense
F15D4.1	chrII	+	13200078	13215613	171	57	-3.0303	1.06e-09	Sense	Direct
M01F1.7	chrIII	-	3521129	3529711	30	10	-3.0303	0.00435391	Sense
M116.2	chrIV	+	8398844	8399775	51	17	-3.0303	0.000230516	Antisense
R148.1	chrIII	+	3186688	3192145	51	17	-3.0303	0.000230516	Antisense
R151.5	chrIII	+	7202589	7207577	478	158	-3.0303	1.49e-29	Antisense
T05H10.2	chrII	+	8047493	8049035	49	16	-3.0303	0.000284069	Antisense
T23G11.4	chrI	+	7694336	7695215	30	10	-3.0303	0.00435391	Antisense
Y49A3A.1	chrV	+	14347751	14350463	30	10	-3.0303	0.00435391	Antisense
Y65B4BR.8	chrI	+	534460	535347	51	17	-3.0303	0.000230516	Antisense
Y95D11A.1	chrI	+	10944202	10945683	58	19	-3.0303	7.46e-05	Antisense	Direct
C06H5.7	chrV	+	17910290	17917049	18	6	-3.125	0.0227754	Antisense
C40H1.6	chrIII	+	9331416	9332156	18	6	-3.125	0.0227754	Antisense
C42C1.8	chrIV	+	12291015	12293257	53	17	-3.125	0.000112182	Antisense
F09E5.7	chrII	+	5352081	5353190	35	11	-3.125	0.00168069	Antisense
F10E7.6	chrII	+	7113022	7113531	79	25	-3.125	2.59e-06	Antisense
F11H8.1	chrIII	+	7021823	7023500	18	6	-3.125	0.036791	Sense
F11H8.4	chrIII	-	7023575	7029130	28	9	-3.125	0.0054332	Sense	Direct
F27C8.5	chrIV	-	9589764	9592503	18	6	-3.125	0.0227754	Sense
F53G12.7	chrI	+	115738	117438	37	12	-3.125	0.00135974	Antisense	Direct
F56D12.6	chrII	+	1310540	1320431	18	6	-3.125	0.036791	Sense
M02B1.3	chrIV	+	12836494	12839993	18	6	-3.125	0.0227754	Antisense
M02B7.5	chrIV	-	3807660	3819318	35	11	-3.125	0.00168069	Sense
R10H10.1	chrIV	+	10387403	10388225	37	12	-3.125	0.00135974	Antisense
T03F6.3	chrIII	+	13389286	13390737	37	12	-3.125	0.00135974	Antisense	Direct
T04A8.13	chrIII	+	4707117	4712491	18	6	-3.125	0.036791	Sense
Y47H9C.10	chrI	+	11901597	11903160	44	14	-3.125	0.000430009	Antisense
Y49E10.19	chrIII	-	12446233	12453082	18	6	-3.125	0.0227754	Sense
Y87G2A.16	chrI	+	13560515	13563438	28	9	-3.125	0.0054332	Antisense
ZC434.7	chrI	+	10345727	10347999	53	17	-3.125	0.000112182	Antisense
ZK355.2	chrII	+	2923912	2926518	132	42	-3.125	1.3e-09	Antisense	Direct
ZK40.1	chrV	+	6453209	6454723	37	12	-3.125	0.00135974	Antisense
B0285.4	chrIII	+	4343431	4345193	51	16	-3.22581	0.000137263	Antisense
B0457.1	chrII	+	8896761	8908557	16	5	-3.22581	0.0444047	Sense
C36F7.2	chrI	+	9544738	9558087	25	8	-3.22581	0.00677455	Antisense
C46E10.4	chrII	+	3717131	3719692	16	5	-3.22581	0.0289034	Antisense
D2007.4	chrIII	+	8144939	8145899	16	5	-3.22581	0.0289034	Antisense
F18C12.3	chrI	+	8095733	8098417	25	8	-3.22581	0.0130504	Sense
F21F8.7	chrV	-	8267592	8268914	16	5	-3.22581	0.0289034	Sense
F32A11.3	chrII	-	13151366	13153294	16	5	-3.22581	0.0289034	Sense
F49C5.3	chrII	+	12536417	12538514	39	12	-3.22581	0.00177009	Sense
F52C9.7	chrIII	+	5308560	5311036	16	5	-3.22581	0.0444047	Sense	Direct
F56D12.4	chrII	+	1327000	1350142	169	53	-3.22581	4.5e-12	Antisense
K09B11.5	chrIV	-	13431255	13433083	16	5	-3.22581	0.0289034	Sense
M88.6	chrIII	+	4562704	4566240	772	237	-3.22581	1.12e-50	Antisense	Direct
T10H9.3	chrV	-	6653624	6655431	16	5	-3.22581	0.0289034	Sense
T22F7.1	chrIII	+	542063	546508	16	5	-3.22581	0.0289034	Antisense
W02A11.4	chrI	+	12741593	12748576	58	18	-3.22581	4.41e-05	Antisense
W03F9.10	chrV	+	128236	131739	16	5	-3.22581	0.0444047	Sense	Direct
Y48A6B.9	chrIII	+	11033053	11035962	16	5	-3.22581	0.0289034	Antisense
Y50D4A.2	chrV	+	1196319	1197001	16	5	-3.22581	0.0289034	Antisense
Y54E5A.2	chrI	+	14694156	14695556	16	5	-3.22581	0.0444047	Sense
Y56A3A.15	chrIII	+	11908848	11909770	83	26	-3.22581	1.03e-06	Antisense	Direct
Y67D8A.2	chrIV	+	3222439	3225309	74	23	-3.22581	3.83e-06	Antisense
ZC395.7	chrIII	+	5263901	5264955	32	10	-3.22581	0.00207403	Antisense
C02F5.3	chrIII	+	8245810	8247178	51	15	-3.33333	7.9e-05	Antisense
C18D4.6	chrV	-	17535798	17538340	23	7	-3.33333	0.00843491	Sense
C18E9.11	chrII	+	8993087	8994452	37	11	-3.33333	0.000790675	Antisense
EEED8.3	chrII	+	5414261	5415342	62	19	-3.33333	1.73e-05	Antisense
F12E12.4	chrII	+	3731966	3733125	62	19	-3.33333	1.73e-05	Antisense
F14D2.13	chrII	-	3343731	3344962	30	9	-3.33333	0.00255372	Sense
F32B6.9	chrIV	+	9903883	9905693	152	45	-3.33333	9.29e-12	Antisense
F54E4.1	chrX	+	14610797	14624771	60	18	-3.33333	2.1e-05	Antisense
K07F5.11	chrIV	+	9852526	9853531	23	7	-3.33333	0.0154661	Sense
R06C1.4	chrI	+	11930714	11931749	568	173	-3.33333	3.6e-38	Antisense
T06A10.3	chrIV	+	16865798	16866419	23	7	-3.33333	0.00843491	Antisense
W06A11.4	chrII	+	4055932	4057647	240	72	-3.33333	2.25e-17	Antisense
Y17G9B.5	chrIV	+	4750230	4751482	46	14	-3.33333	0.000204393	Antisense
Y38C1AA.1	chrIV	+	208188	217390	116	35	-3.33333	4.85e-09	Antisense
Y38E10A.28	chrII	+	12629623	12631907	37	11	-3.33333	0.000790675	Antisense
Y39G10AR.7	chrI	+	2316307	2318286	30	9	-3.33333	0.00558416	Sense	Direct
Y71F9AM.5	chrI	+	2929777	2931362	30	9	-3.33333	0.00255372	Antisense
Y82E9BR.20	chrIII	+	1374141	1376532	305	92	-3.33333	3.6e-18	Sense	Direct
ZK1127.12	chrII	+	7052037	7053726	37	11	-3.33333	0.000790675	Antisense
B0047.3	chrII	-	2044702	2045586	28	8	-3.44828	0.00313458	Sense
C08B6.8	chrV	+	10134631	10142860	42	12	-3.44828	0.000301301	Antisense
D2096.3	chrIV	+	8366735	8375329	125	36	-3.44828	4.3e-10	Antisense	Direct
F10B5.2	chrII	+	8144730	8147178	21	6	-3.44828	0.0182777	Sense
F18A1.5	chrII	+	7664508	7667036	72	21	-3.44828	2.65e-06	Antisense
F54F2.5	chrIII	-	8786998	8792245	14	4	-3.44828	0.0366941	Sense
H01A20.1	chrX	+	14558424	14561348	65	19	-3.44828	8.16e-06	Antisense
K11H3.3	chrIII	+	9851751	9853720	35	10	-3.44828	0.00096338	Antisense	Direct
R07E5.8	chrIII	+	4419826	4423227	85	25	-3.44828	2.81e-07	Antisense
R08D7.5	chrIII	+	8974095	8974836	14	4	-3.44828	0.0366941	Antisense
T05C12.7	chrII	+	8185375	8187317	28	8	-3.44828	0.00652588	Sense	Direct
T10B5.3	chrV	-	1864180	1868567	14	4	-3.44828	0.0366941	Sense
T13H5.8	chrII	+	8518440	8520627	85	25	-3.44828	2.81e-07	Antisense
Y23H5B.1	chrI	+	2553094	2557426	28	8	-3.44828	0.00313458	Antisense
Y48A6C.5	chrIII	+	11131680	11135864	21	6	-3.44828	0.0104764	Antisense
Y54E5A.3	chrI	+	14696511	14700287	76	22	-3.44828	1.03e-06	Antisense
ZK662.3	chrX	+	15708142	15716791	21	6	-3.44828	0.0182777	Sense
B0285.7	chrIII	+	4356509	4364943	139	39	-3.57143	2.62e-11	Antisense
F10B5.7	chrII	+	8162487	8168577	25	7	-3.57143	0.0075909	Sense
F42H10.9	chrIII	+	8493790	8497256	25	7	-3.57143	0.00383061	Antisense
F49B2.1	chrI	+	14298741	14307121	148	41	-3.57143	4.04e-12	Antisense
W09B6.4	chrII	-	1132373	1140845	32	9	-3.57143	0.00116895	Sense
W10D5.1	chrI	+	9095948	9100050	141	39	-3.57143	1.21e-11	Antisense
Y37E3.8	chrI	-	2069679	2070611	53	15	-3.57143	3.66e-05	Sense	Direct
Y50D7A.11	chrIII	+	265095	266592	25	7	-3.57143	0.00383061	Antisense
Y80D3A.2	chrV	-	18860713	18894932	65	18	-3.57143	4.53e-06	Sense
C05D11.3	chrIII	+	6432122	6433090	44	12	-3.7037	0.00013763	Antisense
F26H9.7	chrI	+	9310319	9312595	30	8	-3.7037	0.00141061	Antisense	Direct
F28C6.8	chrII	+	8606779	8607665	30	8	-3.7037	0.00141061	Antisense	Direct
F41E6.9	chrV	-	8605064	8606102	18	5	-3.7037	0.0129574	Sense
F52A8.4	chrI	+	7342899	7345947	99	27	-3.7037	9.18e-09	Antisense
T01C3.6	chrV	-	15000034	15000513	18	5	-3.7037	0.0129574	Sense
Y47H9C.8	chrI	+	11893874	11896272	49	13	-3.7037	5.21e-05	Antisense
Y53F4B.15	chrII	+	15039304	15048806	196	53	-3.7037	9.1e-14	Sense
Y76B12C.8	chrIV	+	1979986	1980362	18	5	-3.7037	0.0215008	Sense
F26H9.6	chrI	+	9308435	9309761	58	15	-3.84615	7.51e-06	Antisense
F44F1.4	chrI	-	13263790	13265588	12	3	-3.84615	0.04652	Sense
F45E4.2	chrIV	+	7633413	7634415	12	3	-3.84615	0.04652	Antisense
H38K22.1	chrIII	-	4303066	4313096	12	3	-3.84615	0.04652	Sense
K10C8.2	chrV	+	12690491	12692343	46	12	-3.84615	6.17e-05	Antisense
M02E1.1	chrX	+	325961	334587	12	3	-3.84615	0.04652	Antisense
R148.2	chrIII	+	3183681	3184960	12	3	-3.84615	0.04652	Antisense
T07A9.8	chrIV	+	396544	399084	62	16	-3.84615	2.86e-06	Antisense
T23D8.3	chrI	-	9973369	9976304	12	3	-3.84615	0.04652	Sense	Direct
W01B6.5	chrIV	+	10076296	10078621	12	3	-3.84615	0.04652	Antisense	Direct
Y116A8C.27	chrIV	-	17090698	17096218	12	3	-3.84615	0.04652	Sense
Y43E12A.3	chrIV	+	10987875	10989152	12	3	-3.84615	0.04652	Antisense
Y48C3A.16	chrII	+	13402887	13404537	12	3	-3.84615	0.04652	Antisense
Y48G1C.5	chrI	-	55315	64021	12	3	-3.84615	0.04652	Sense	Direct
Y63D3A.6	chrI	-	14107755	14113166	12	3	-3.84615	0.04652	Sense
ZK637.7	chrIII	-	8900143	8904038	12	3	-3.84615	0.04652	Sense
ZK892.1	chrII	+	9991290	10000259	12	3	-3.84615	0.04652	Antisense
C41C4.4	chrII	-	8112193	8124770	16	4	-4	0.0159089	Sense
F16D3.4	chrI	-	8363954	8369910	16	4	-4	0.0159089	Sense
F21H11.2	chrIII	+	5109659	5130632	39	10	-4	0.000194443	Antisense
F38A5.13	chrIV	+	6585854	6588168	49	12	-4	0.000102163	Sense
F43G9.6	chrI	-	8623009	8630517	16	4	-4	0.0159089	Sense
K01C8.9	chrII	-	8280770	8283140	16	4	-4	0.0159089	Sense
Y51H1A.6	chrII	+	13888562	13894592	16	4	-4	0.0250943	Sense
Y57A10A.30	chrII	+	12283277	12283936	28	7	-4	0.00168956	Antisense
ZC410.7	chrIV	-	9092260	9094448	16	4	-4	0.0159089	Sense
B0391.9	chrV	-	15593435	15593773	42	10	-4.16667	8.48e-05	Sense
C05D11.9	chrIII	-	6427471	6430876	21	5	-4.16667	0.00559385	Sense
C08F11.7	chrIV	+	13637255	13638493	222	53	-4.16667	8.08e-20	Antisense
F40F8.3	chrII	+	11129212	11130047	42	10	-4.16667	8.48e-05	Antisense
F47B3.4	chrI	+	3961038	3962201	25	6	-4.16667	0.00200277	Antisense
H38K22.3	chrIII	+	4317673	4320300	21	5	-4.16667	0.00559385	Antisense	Direct
T20B5.1	chrX	+	9338610	9342368	21	5	-4.16667	0.00559385	Antisense
Y39G10AR.6	chrI	+	2333326	2338689	25	6	-4.16667	0.00408391	Sense
Y54G2A.20	chrIV	-	2896966	2900635	152	36	-4.16667	3.08e-14	Sense
Y75B8A.22	chrIII	-	12240354	12250034	21	5	-4.16667	0.00559385	Sense	Direct
C24H11.9	chrIII	+	11777524	11778950	30	7	-4.34783	0.000726217	Antisense
C54G4.9	chrI	-	8024908	8026519	30	7	-4.34783	0.000726217	Sense
C56A3.5	chrV	+	13551892	13553355	55	13	-4.34783	4.44e-06	Antisense	Direct
Y37E3.3	chrI	+	2064294	2064690	146	33	-4.34783	4.4e-14	Antisense
Y53F4B.17	chrII	+	15058128	15061959	102	23	-4.34783	2.75e-10	Antisense
B0545.1	chrIV	+	92015	110151	18	4	-4.54545	0.00662708	Antisense
F11A10.7	chrIV	+	12085393	12086650	14	3	-4.54545	0.0288777	Sense
F21F3.3	chrI	+	4901974	4903137	14	3	-4.54545	0.0288777	Sense
F25H2.7	chrI	+	10558355	10559778	23	5	-4.54545	0.00233883	Antisense
F34D10.2	chrIII	-	3731227	3735018	14	3	-4.54545	0.0192721	Sense
F35H12.2	chrX	+	924985	932236	14	3	-4.54545	0.0288777	Sense
F42G8.3	chrIV	+	8143480	8148621	14	3	-4.54545	0.0288777	Sense
F54F11.2	chrII	+	13507726	13516387	23	5	-4.54545	0.00233883	Antisense
F55A4.1	chrX	+	1035545	1036995	18	4	-4.54545	0.00662708	Antisense
F56D2.2	chrIII	+	5587217	5588990	14	3	-4.54545	0.0288777	Sense
H26D21.1	chrI	+	3698108	3699302	51	11	-4.54545	5.72e-06	Antisense
K08A2.4	chrII	+	2988301	2991233	97	21	-4.54545	3.42e-10	Antisense
K12D12.5	chrII	+	11860953	11863218	18	4	-4.54545	0.0113012	Sense
R04A9.2	chrX	+	372235	376898	14	3	-4.54545	0.0192721	Antisense
R155.4	chrIII	+	1977302	1980450	14	3	-4.54545	0.0192721	Antisense
T04A11.6	chrIV	+	12490767	12495110	14	3	-4.54545	0.0288777	Sense
W10C8.2	chrI	-	2823468	2830294	14	3	-4.54545	0.0192721	Sense
Y39G10AR.12	chrI	-	2297280	2300086	14	3	-4.54545	0.0192721	Sense
Y51B9A.3	chrII	-	9405515	9407037	18	4	-4.54545	0.00662708	Sense
Y76A2B.2	chrIII	+	13527317	13539832	67	15	-4.54545	2.7e-07	Antisense
T03F6.1	chrIII	+	13393782	13394841	644	136	-4.7619	3.32e-60	Antisense	Direct
Y71G12A.2	chrI	+	1895161	1904607	62	13	-4.7619	3.36e-07	Antisense
Y73F8A.33	chrIV	+	15515455	15521144	95	20	-4.7619	5.42e-09	Sense
ZK856.4	chrV	+	10183253	10184416	62	13	-4.7619	3.36e-07	Antisense
B0035.11	chrIV	-	11327596	11329340	30	6	-5	0.000343785	Sense
C27A2.1	chrII	+	5062121	5067086	25	5	-5	0.00199678	Sense	Direct
F07E5.8	chrII	-	2072361	2075831	30	6	-5	0.000343785	Sense
Y7A5A.8	chrX	+	15821342	15825059	39	8	-5	0.000142614	Sense	Direct
ZK973.2	chrI	+	4373664	4379141	39	8	-5	0.000142614	Sense	Direct
C04A2.1	chrII	+	6848295	6851244	16	3	-5.26316	0.00765745	Antisense
C15H7.4	chrIII	-	9654309	9655760	46	9	-5.26316	6.98e-06	Sense
E03H12.7	chrIV	-	4987746	4988587	21	4	-5.26316	0.00267064	Sense
F09E5.2	chrII	+	5375239	5377062	37	7	-5.26316	5.07e-05	Antisense
F25H2.12	chrI	+	10570067	10571893	16	3	-5.26316	0.00765745	Antisense
F41C3.3	chrII	+	4742114	4745125	37	7	-5.26316	5.07e-05	Antisense
F43G6.4	chrII	+	11790674	11797163	42	8	-5.26316	1.88e-05	Antisense
R05D3.12	chrIII	+	8380863	8381460	16	3	-5.26316	0.00765745	Antisense
R12C12.2	chrII	+	6048069	6049380	16	3	-5.26316	0.0124081	Sense
R13A5.1	chrIII	+	7584261	7591499	21	4	-5.26316	0.00492648	Sense
T02C1.1	chrIII	+	9247551	9248505	42	8	-5.26316	1.88e-05	Antisense
T24B8.1	chrII	-	9056453	9057000	16	3	-5.26316	0.00765745	Sense	Direct
T25B9.9	chrIV	+	10769632	10777529	21	4	-5.26316	0.00492648	Sense	Direct
T25G3.1	chrI	+	7552969	7554475	16	3	-5.26316	0.00765745	Antisense
W04B5.5	chrIII	-	2411232	2418193	16	3	-5.26316	0.00765745	Sense
Y44E3A.1	chrI	+	3338367	3340026	37	7	-5.26316	5.07e-05	Antisense	Direct
Y71F9AL.13	chrI	-	2875395	2876313	16	3	-5.26316	0.00765745	Sense	Direct
M18.3	chrIV	+	12105827	12108361	28	5	-5.55556	0.000377836	Antisense
R06B9.6	chrII	+	13741660	13749716	39	7	-5.55556	2.01e-05	Antisense
Y48D7A.1	chrX	+	3009490	3010167	55	10	-5.55556	4.22e-07	Antisense
Y54G11B.1	chrII	+	14455533	14464814	51	9	-5.55556	1.12e-06	Antisense
C16A11.3	chrII	+	4229544	4234317	35	6	-5.88235	0.000151831	Sense	Direct
C46C2.3	chrIV	+	9225692	9227759	12	2	-5.88235	0.0323226	Sense	Direct
F21F3.3	chrI	+	4901974	4903137	60	10	-5.88235	6.51e-08	Antisense
F39E9.4	chrII	+	3282648	3287148	12	2	-5.88235	0.0323226	Sense
F47D12.7	chrIII	-	6293256	6295794	12	2	-5.88235	0.0227294	Sense
F53B6.7	chrI	+	8948772	8954344	72	12	-5.88235	3.12e-08	Sense
K10B3.5	chrX	-	3103241	3106271	12	2	-5.88235	0.0227294	Sense
K11B4.1	chrI	+	14794885	14797145	12	2	-5.88235	0.0323226	Sense
K12C11.5	chrI	+	1333029	1334074	12	2	-5.88235	0.0227294	Antisense
M01D7.5	chrI	+	1843400	1843835	12	2	-5.88235	0.0227294	Antisense
M04B2.2	chrIV	+	11528026	11530541	12	2	-5.88235	0.0227294	Antisense
T12G3.6	chrIV	-	12030124	12030845	12	2	-5.88235	0.0227294	Sense
W09G3.1	chrI	-	13828143	13832133	23	4	-5.88235	0.00104663	Sense
Y110A2AL.1	chrII	+	2875103	2876616	12	2	-5.88235	0.0227294	Antisense	Direct
Y71G12B.1	chrI	+	1823447	1825967	12	2	-5.88235	0.0323226	Sense
K02B12.7	chrI	-	8526753	8529264	37	6	-6.25	2.1e-05	Sense	Direct
K07B1.4	chrV	+	9328942	9331288	25	4	-6.25	0.000400531	Antisense
K07C5.3	chrV	+	10343003	10345457	18	3	-6.25	0.00515884	Sense
T01D1.2	chrII	+	162373	170628	18	3	-6.25	0.00515884	Sense
T23F6.4	chrIV	+	12724959	12729943	18	3	-6.25	0.00515884	Sense
Y18D10A.16	chrI	-	12903050	12904027	18	3	-6.25	0.00294235	Sense	Direct
C46A5.9	chrIV	-	7770737	7774253	39	6	-6.66667	8.01e-06	Sense
F38A5.2	chrIV	-	6582686	6585384	46	7	-6.66667	1.16e-06	Sense	Direct
B0464.9	chrIII	+	9465673	9467043	14	2	-7.14286	0.0130085	Sense
C04E7.3	chrX	-	344126	346289	7	0	-7.14286	0.0229481	Sense
C18D11.2	chrIII	-	11819680	11822396	7	0	-7.14286	0.0229481	Sense	Direct
C26E6.8	chrIII	-	4918361	4920279	7	0	-7.14286	0.0229481	Sense
C30A5.2	chrIII	+	8226397	8232481	7	0	-7.14286	0.0292504	Sense
C41H7.4	chrII	+	3003976	3005519	7	0	-7.14286	0.0292504	Sense
C44B9.1	chrIII	+	10869273	10874410	7	0	-7.14286	0.0292504	Sense
C47E12.1	chrIV	+	10003725	10005396	7	0	-7.14286	0.0292504	Sense
C52E2.6	chrII	-	1846592	1848156	7	0	-7.14286	0.0229481	Sense	Direct
C53A5.6	chrV	-	14543696	14545799	7	0	-7.14286	0.0229481	Sense
F08F8.2	chrIII	+	7359422	7362026	7	0	-7.14286	0.0292504	Sense
F09E5.13	chrII	-	5371997	5373394	7	0	-7.14286	0.0229481	Sense
F10C2.5	chrV	+	12045408	12048594	7	0	-7.14286	0.0292504	Sense
F10E9.4	chrIII	+	8308469	8309594	7	0	-7.14286	0.0292504	Sense	Direct
F16D3.7	chrI	+	8384972	8386666	7	0	-7.14286	0.0292504	Sense
F21C3.6	chrI	-	7283957	7285760	7	0	-7.14286	0.0229481	Sense
F25B3.6	chrV	-	9580013	9582617	14	2	-7.14286	0.0084551	Sense
F25H2.13	chrI	+	10572017	10577113	7	0	-7.14286	0.0292504	Sense
F42G9.4	chrIII	+	761484	762303	55	8	-7.14286	6.37e-08	Antisense
F44G4.1	chrII	+	8994554	8996188	7	0	-7.14286	0.0292504	Sense	Direct
F46B6.4	chrV	-	9777856	9779489	7	0	-7.14286	0.0229481	Sense
F49C12.12	chrIV	-	9320098	9321068	7	0	-7.14286	0.0229481	Sense
F52H3.6	chrII	-	10026571	10027785	7	0	-7.14286	0.0229481	Sense
F55A4.8	chrX	-	1038689	1046204	7	0	-7.14286	0.0229481	Sense
F56F3.6	chrIII	-	4477064	4477489	7	0	-7.14286	0.0229481	Sense
F56F4.5	chrI	+	6133244	6137981	7	0	-7.14286	0.0229481	Antisense
F57B9.4	chrIII	+	6935902	6939314	35	5	-7.14286	2.11e-05	Antisense
F58A6.8	chrII	-	5156681	5157065	7	0	-7.14286	0.0229481	Sense
H25P19.1	chrV	+	687716	690001	7	0	-7.14286	0.0292504	Sense
K08H2.1	chrX	-	13225732	13226586	7	0	-7.14286	0.0229481	Sense
M04G7.3	chrIV	-	461515	463879	7	0	-7.14286	0.0229481	Sense
M05D6.7	chrII	+	8485868	8487440	14	2	-7.14286	0.0130085	Sense	Direct
M162.8	chrV	-	19771468	19772563	14	2	-7.14286	0.0084551	Sense
R04E5.9	chrX	-	8806051	8810975	14	2	-7.14286	0.0084551	Sense
T02E1.7	chrI	-	8208817	8210664	7	0	-7.14286	0.0229481	Sense
T02H6.7	chrII	+	682674	683326	7	0	-7.14286	0.0292504	Sense
T04A8.16	chrIII	-	4700298	4704018	44	6	-7.14286	1.12e-06	Sense	Direct
T12B5.1	chrIII	+	962290	963513	14	2	-7.14286	0.0084551	Antisense
T14G10.4	chrIV	+	10156175	10156707	7	0	-7.14286	0.0292504	Sense
T23G11.6	chrI	-	7685074	7689398	7	0	-7.14286	0.0229481	Sense
T27F7.1	chrII	+	4994205	4995462	21	3	-7.14286	0.00109999	Antisense
W04A8.3	chrI	-	13844715	13845991	7	0	-7.14286	0.0229481	Sense
W05F2.7	chrI	+	3352463	3363363	7	0	-7.14286	0.0292504	Sense
W10G11.20	chrII	+	3553829	3554541	7	0	-7.14286	0.0292504	Sense
Y39A1A.21	chrIII	-	10700576	10706904	14	2	-7.14286	0.0084551	Sense
Y40B1B.8	chrI	+	13428900	13434596	7	0	-7.14286	0.0292504	Sense
Y43F8B.18	chrV	+	19485952	19486693	14	2	-7.14286	0.0084551	Antisense
Y54E10BR.3	chrI	+	3021649	3028385	7	0	-7.14286	0.0292504	Sense
Y57G11C.36	chrIV	-	14771381	14773496	14	2	-7.14286	0.0084551	Sense
Y75B7B.2	chrV	-	1274211	1276007	7	0	-7.14286	0.0229481	Sense
Y7A5A.9	chrX	+	15826565	15829693	7	0	-7.14286	0.0292504	Sense
ZC404.8	chrV	-	6783635	6784885	14	2	-7.14286	0.0084551	Sense
ZK1128.7	chrIII	+	10136965	10138876	21	3	-7.14286	0.00109999	Antisense	Direct
ZK1236.3	chrIII	+	8416145	8422569	7	0	-7.14286	0.0292504	Sense
ZK287.5	chrV	-	9689924	9690492	7	0	-7.14286	0.0229481	Sense
K01H12.4	chrIV	+	9713196	9714862	23	3	-7.69231	0.000825946	Sense
T04H1.4	chrV	+	12245570	12251223	23	3	-7.69231	0.000825946	Sense
B0286.1	chrII	+	4378829	4386281	16	2	-8.33333	0.00507384	Sense
C36B1.5	chrI	-	8733520	8735700	16	2	-8.33333	0.0030466	Sense
F07E5.1	chrII	+	2064462	2068972	16	2	-8.33333	0.00507384	Sense
F10F2.7	chrIII	+	4628411	4631095	25	3	-8.33333	0.00014404	Antisense
F23F12.3	chrIII	+	6500398	6507657	32	4	-8.33333	2e-05	Antisense
F37C12.1	chrIII	+	7184276	7187780	16	2	-8.33333	0.00507384	Sense
M01G5.1	chrIII	+	1498005	1508529	49	6	-8.33333	6.75e-07	Sense	Direct
M03F8.3	chrV	+	5940006	5943344	16	2	-8.33333	0.00507384	Sense
Y102A5C.19	chrV	+	16966854	16968554	16	2	-8.33333	0.0030466	Antisense
Y14H12B.1	chrII	+	3934479	3936001	16	2	-8.33333	0.00507384	Sense
Y32F6A.2	chrV	-	10438337	10440767	16	2	-8.33333	0.0030466	Sense
Y59A8A.1	chrV	-	17861351	17870618	16	2	-8.33333	0.0030466	Sense	Direct
C05B10.1	chrIV	+	6842947	6844810	9	1	-9.09091	0.0339547	Sense
C05B5.2	chrIII	-	9998437	10000412	9	0	-9.09091	0.00652122	Sense	Direct
C05D11.3	chrIII	+	6432122	6433090	9	1	-9.09091	0.0339547	Sense
C49H3.4	chrIV	+	7915294	7916623	37	4	-9.09091	2.53e-06	Antisense
C50B6.11	chrV	+	13340036	13342698	9	0	-9.09091	0.00652122	Antisense
C50F4.12	chrV	-	9538058	9539708	9	1	-9.09091	0.0251935	Sense
E03H4.11	chrI	+	12433049	12434875	9	0	-9.09091	0.00652122	Antisense
F07E5.5	chrII	-	2053926	2059071	9	1	-9.09091	0.0251935	Sense
F13G3.5	chrI	-	7301059	7303225	9	1	-9.09091	0.0251935	Sense
F14D2.12	chrII	-	3345274	3346366	9	1	-9.09091	0.0251935	Sense
F25G6.3	chrV	+	8561245	8564050	9	1	-9.09091	0.0251935	Antisense
F26A3.7	chrI	-	7674749	7676115	18	2	-9.09091	0.00107053	Sense
F36D3.1	chrV	+	16499323	16502840	9	1	-9.09091	0.0339547	Sense	Direct
F37A4.7	chrIII	+	6690946	6703720	9	1	-9.09091	0.0251935	Antisense
F44D12.6	chrIV	+	10033334	10034776	18	2	-9.09091	0.00193057	Sense
F52F12.5	chrI	-	9921295	9921822	18	2	-9.09091	0.00107053	Sense
F54B3.2	chrII	-	10268094	10271071	9	1	-9.09091	0.0251935	Sense
F56B3.12	chrIV	-	794751	795406	9	0	-9.09091	0.00652122	Sense
K07A1.11	chrI	-	9616515	9618098	9	1	-9.09091	0.0251935	Sense
K09E3.2	chrX	+	17117574	17117904	9	0	-9.09091	0.00652122	Antisense
K11H3.1	chrIII	-	9853974	9858400	9	1	-9.09091	0.0251935	Sense
M03B6.4	chrX	+	13859028	13860794	9	1	-9.09091	0.0251935	Antisense
M03E7.3	chrV	+	5615026	5616165	9	1	-9.09091	0.0251935	Antisense
M03F4.2	chrX	+	4962843	4963953	9	0	-9.09091	0.00652122	Antisense
R05H5.3	chrII	+	10197548	10198103	9	1	-9.09091	0.0339547	Sense	Direct
R07E5.14	chrIII	+	4406288	4407074	9	1	-9.09091	0.0339547	Sense	Direct
R11B5.1	chrX	-	2525207	2532431	9	1	-9.09091	0.0251935	Sense
T04C10.2	chrX	-	14815721	14818428	9	1	-9.09091	0.0251935	Sense
T09A5.12	chrII	-	7866789	7870082	9	1	-9.09091	0.0251935	Sense
T23G7.5	chrII	+	9177219	9178505	9	1	-9.09091	0.0339547	Sense
W04D2.6	chrV	+	12498231	12503715	9	1	-9.09091	0.0339547	Sense
W09C3.2	chrI	+	4711428	4713447	9	1	-9.09091	0.0339547	Sense
Y110A7A.16	chrI	-	5114121	5118855	9	0	-9.09091	0.00652122	Sense
Y39E4B.8	chrIII	+	13119696	13133756	9	0	-9.09091	0.00901243	Sense	Direct
Y47G6A.23	chrI	-	3565041	3578690	9	1	-9.09091	0.0251935	Sense
Y48G1C.9	chrI	+	91408	92648	9	0	-9.09091	0.00652122	Antisense
Y54E5A.3	chrI	+	14696511	14700287	9	1	-9.09091	0.0339547	Sense
Y55B1AR.4	chrIII	-	604003	605509	9	0	-9.09091	0.00652122	Sense
Y73B3B.3	chrX	+	211440	211676	9	1	-9.09091	0.0251935	Antisense
Y97E10AR.6	chrV	-	8012376	8014162	9	1	-9.09091	0.0251935	Sense
ZK353.4	chrIII	-	8388425	8389558	9	0	-9.09091	0.00652122	Sense
ZK512.5	chrIII	+	9125749	9130704	9	0	-9.09091	0.00901243	Sense
ZK524.2	chrI	+	7433412	7453725	9	0	-9.09091	0.00652122	Antisense
ZK669.4	chrII	-	7942808	7945106	9	1	-9.09091	0.0251935	Sense
ZK863.6	chrV	+	12191514	12191965	9	1	-9.09091	0.0339547	Sense
C03B1.7	chrX	+	6342113	6345603	12	1	-11.1111	0.0123832	Sense
C04F6.1	chrX	+	3403468	3408543	12	1	-11.1111	0.00848585	Antisense
C24G6.4	chrV	+	5505436	5509819	12	1	-11.1111	0.00848585	Antisense
C29E4.13	chrIII	-	7926925	7928663	12	0	-11.1111	0.00185315	Sense
C31G12.1	chrV	+	18179926	18181254	12	0	-11.1111	0.00185315	Antisense
C33H5.11	chrIV	-	7786180	7789430	12	0	-11.1111	0.00185315	Sense
C55B7.5	chrI	+	6494291	6496111	12	1	-11.1111	0.0123832	Sense	Direct
C56A3.6	chrV	-	13553460	13556366	12	1	-11.1111	0.00848585	Sense
F20G4.2	chrI	-	7910183	7918335	12	1	-11.1111	0.00848585	Sense
F35B12.5	chrV	+	11610685	11613032	12	0	-11.1111	0.00277685	Sense
F49E8.2	chrIV	+	7548421	7551496	109	10	-11.1111	1.11e-15	Sense
F55A3.2	chrI	+	10793389	10798030	12	1	-11.1111	0.0123832	Sense	Direct
F56B3.5	chrIV	+	797022	799855	12	1	-11.1111	0.0123832	Sense
H20J04.4	chrII	+	4329016	4334479	12	1	-11.1111	0.0123832	Sense
K02E7.4	chrII	+	1072411	1074733	12	0	-11.1111	0.00185315	Antisense
K07F5.9	chrIV	-	9850674	9851004	12	1	-11.1111	0.00848585	Sense
R13G10.4	chrIII	-	3826356	3829184	12	1	-11.1111	0.00848585	Sense
T04C10.1	chrX	-	14819832	14824461	12	0	-11.1111	0.00185315	Sense
T12E12.1	chrIV	+	5551120	5558808	12	1	-11.1111	0.0123832	Sense
T26H2.10	chrV	+	19223816	19225038	12	0	-11.1111	0.00185315	Antisense
W09H1.5	chrII	-	13185921	13187242	12	1	-11.1111	0.00848585	Sense
Y45F10A.3	chrIV	+	13512113	13513363	12	0	-11.1111	0.00277685	Sense	Direct
Y92H12A.3	chrI	+	1529889	1534237	12	0	-11.1111	0.00277685	Sense
ZC328.3	chrI	-	6409061	6416885	12	1	-11.1111	0.00848585	Sense
C11D2.3	chrIV	+	6154089	6154607	37	3	-12.5	2.29e-06	Sense
K08H10.2	chrV	+	10022469	10028131	1224	98	-12.5	9.05e-188	Antisense	Direct
F54D8.3	chrIII	+	5077724	5080626	14	1	-14.2857	0.00440739	Sense
K08H10.1	chrV	+	10020534	10022469	58	4	-14.2857	1.45e-10	Antisense	Direct
W06E11.2	chrIII	+	640790	641537	14	1	-14.2857	0.00440739	Sense
Y25C1A.1	chrII	+	3114249	3116744	14	1	-14.2857	0.00440739	Sense
Y38A8.2	chrII	-	4954658	4955373	14	0	-14.2857	0.000526616	Sense
T04A8.9	chrIII	+	4698089	4699260	16	1	-16.6667	0.00154037	Sense
Y55B1BL.1	chrIII	+	402448	405216	16	1	-16.6667	0.00154037	Sense
Y67H2A.4	chrIV	+	13297878	13300036	16	1	-16.6667	0.00154037	Sense	Direct
Y75B8A.19	chrIII	+	12226430	12231998	16	1	-16.6667	0.00154037	Sense	Direct
ZC64.2	chrX	-	3840964	3842428	16	1	-16.6667	0.000899514	Sense
C02F4.1	chrIV	+	10484081	10492924	21	0	-20	2.5e-05	Sense
F20B6.7	chrX	-	4206805	4207453	18	1	-20	0.000286059	Sense
R09B3.4	chrI	+	11911313	11912036	18	1	-20	0.000530806	Sense	Direct
Y47H9C.9	chrI	-	11898778	11901448	18	0	-20	4.25e-05	Sense
C27F2.7	chrIII	-	4980606	4984438	23	1	-25	2.8e-05	Sense
F55B12.3	chrV	+	13819338	13822959	23	1	-25	6.11e-05	Sense
H15N14.1	chrI	+	7773411	7777571	53	2	-25	4.3e-11	Antisense
Y105E8A.20	chrI	-	14486935	14494896	53	2	-25	4.3e-11	Sense	Direct
C15F1.3	chrII	-	6955344	6965626	67	2	-33.3333	3.49e-14	Sense
D2096.12	chrIV	+	8363444	8366359	39	1	-33.3333	2.59e-08	Sense
T28D6.4	chrIII	+	11360336	11366056	72	2	-33.3333	3.19e-15	Antisense
ZK1098.2	chrIII	+	9529066	9531789	30	1	-33.3333	2.25e-06	Sense
T10G3.5	chrV	-	13491048	13497353	1051	20	-50	2.85e-217	Sense
R06C7.9	chrI	+	7255508	7258698	20778	83	-250.337	0	Antisense	Direct

## Sheet: adr-2
Gene locus	Chromosome	Strand	Gene chr start position	Gene chr stop position	Normalized # of WT reads	Normalized # of adr-2 reads	Fold change (adr-2 vs wt)	pVal	Read Type	Class
T16A1.8	chrII	-	2091743	2093850	1419	2240	1.58	2.34e-35	Antisense	Inverse
C44B11.6	chrIII	+	3152725	3153450	1669	1919	1.2	0.00013	Antisense	Inverse
F43E2.6	chrII	-	7367383	7368783	1435	1256	1.2	0.0013426	Sense	Inverse
F39E9.7	chrII	-	3306026	3307113	687	1221	1.78	7.81e-30	Antisense	Inverse
F43E2.6	chrII	-	7367383	7368783	571	958	1.68	5.72e-20	Antisense	Inverse
F44E2.2	chrIII	+	8853709	8861292	445	895	-2	1.33e-34	Sense	Direct
F39E9.10	chrII	-	3302775	3303315	1169	712	1.64	2.19e-23	Sense	Inverse
F39E9.10	chrII	-	3302775	3303315	349	685	1.96	1.24e-22	Antisense	Inverse
E01G4.7	chrII	+	13478065	13478835	405	668	1.65	2.4e-14	Antisense	Inverse
C40A11.10	chrII	-	2136554	2137301	362	636	1.76	7.23e-16	Antisense	Inverse
Y116A8B.1	chrIV	+	17216255	17217324	470	613	-1.2987	3.18e-06	Sense	Direct
Y116A8B.1	chrIV	+	17216255	17217324	376	559	1.49	1.43e-08	Antisense	Inverse
Y105C5A.14	chrIV	-	15646113	15648073	447	542	1.21	0.00622	Antisense	Inverse
T05E12.8	chrV	+	17069215	17069502	364	499	1.37	1.18e-05	Antisense	Inverse
F39E9.6	chrII	-	3310282	3311925	274	468	1.71	3.21e-11	Antisense	Inverse
K02E2.6	chrV	+	20376056	20376797	232	417	1.8	3.67e-12	Antisense	Inverse
C01A2.1	chrI	-	13408784	13410495	193	402	2.08	6.62e-16	Antisense	Inverse
W05H12.2	chrI	-	13411784	13412867	224	379	1.69	3.9e-09	Antisense	Inverse
Y82E9BR.20	chrIII	+	1374141	1376532	184	358	1.94	7.95e-13	Antisense	Inverse
F39E9.7	chrII	-	3306026	3307113	495	335	1.48	1.4e-07	Sense	Inverse
C40A11.10	chrII	-	2136554	2137301	432	316	1.37	5.4e-05	Sense	Inverse
T25G12.11	chrX	-	17236816	17237770	153	256	1.67	2.01e-06	Antisense	Inverse
W04B5.2	chrIII	+	2424342	2427460	126	245	1.94	2.87e-09	Antisense	Inverse
F55C9.3	chrV	-	19286972	19287576	118	222	1.88	9.76e-08	Antisense	Inverse
F52D2.6	chrX	+	1974907	1980932	140	219	1.56	6e-05	Antisense	Inverse
Y37E11B.2	chrIV	+	3578559	3579137	122	206	1.69	8.37e-06	Antisense	Inverse
Y17D7B.4	chrV	-	18776202	18776652	143	197	1.38	0.00525	Antisense	Inverse
F55C9.5	chrV	-	19290628	19290943	121	188	1.55	0.000338	Antisense	Inverse
Y43F8B.9	chrV	+	19479166	19480371	102	153	1.5	0.00164	Antisense	Inverse
W04B5.1	chrIII	+	2428211	2429351	90	150	1.66	0.000176	Antisense	Inverse
E01G4.5	chrII	+	13472338	13473831	97	149	1.53	0.00127	Antisense	Inverse
Y116F11A.1	chrV	+	19725976	19727554	72	146	2.03	1.15e-06	Antisense	Inverse
Y46G5A.4	chrII	-	12726866	12736783	289	145	-2	4.45e-12	Antisense	Direct
R107.6	chrIII	+	9054961	9058536	282	143	-1.96078	2.9e-11	Antisense	Direct
C28C12.2	chrIV	+	8499300	8500063	187	141	-1.31579	0.00738	Antisense	Direct
M01E11.6	chrI	-	5577057	5579302	253	137	-1.85185	2.92e-09	Antisense	Direct
Y39G10AR.7	chrI	+	2316307	2318286	224	111	-2.04082	1.02e-09	Antisense	Direct
ZK1055.1	chrV	+	6594208	6599123	295	111	-2.7027	2.61e-19	Antisense	Direct
F36A4.7	chrIV	+	4248062	4258156	224	106	-2.12766	1.56e-10	Antisense	Direct
K09H11.3	chrV	+	5717888	5722064	198	105	-1.88679	1.11e-07	Antisense	Direct
W04B5.2	chrIII	+	2424342	2427460	164	102	1.61	0.000320621	Sense	Inverse
F31D4.5	chrV	+	20849530	20853487	50	101	-2.04082	2.64e-05	Sense
C39B5.2	chrIII	+	2233875	2236970	8	100	12.48	3.25e-20	Antisense	Inverse
F36D4.3	chrV	+	9386126	9400035	183	100	-1.81818	9.5e-07	Antisense	Direct
K07A12.2	chrI	-	8676658	8681312	175	97	-1.78571	1.87e-06	Antisense	Direct
T12E12.3	chrIV	+	5541619	5544720	268	96	-2.77778	1.05e-18	Antisense	Direct
D2030.6	chrI	-	7585508	7588356	194	94	-2.08333	3.36e-09	Antisense	Direct
F15B9.4	chrV	+	13002321	13006969	178	90	-1.96078	1.26e-07	Antisense	Direct
F41H10.5	chrIV	+	5361001	5361970	38	87	-2.27273	1.1e-05	Sense
C41G7.2	chrI	+	9512442	9514746	170	86	-2	1.84e-07	Antisense	Direct
Y53F4B.9	chrII	-	15004770	15010318	165	84	-1.96078	2.71e-07	Antisense	Direct
Y46G5A.5	chrII	-	12736956	12738240	167	83	-2	1e-07	Antisense	Direct
F58G1.1	chrII	+	12919485	12923286	210	81	-2.63158	1.05e-13	Antisense	Direct
C15H11.5	chrV	+	14418073	14420002	156	78	-2	5.55e-07	Antisense	Direct
Y67D8C.5	chrIV	-	3032725	3049968	185	78	-2.38095	5.84e-11	Antisense	Direct
F10G7.4	chrII	+	4698708	4700978	192	77	-2.5	6.63e-12	Antisense	Direct
Y111B2A.3	chrIII	+	12496423	12498902	156	77	-2	3.54e-07	Antisense	Direct
Y110A7A.18	chrI	-	5158513	5162207	150	75	-2	4.6e-07	Antisense	Direct
C14B9.4	chrIII	+	8101273	8104002	171	70	-2.43902	1.75e-10	Antisense	Direct
T19H12.2	chrV	+	4890414	4891408	120	69	-1.75439	0.000192	Antisense	Direct
Y48G1C.1	chrI	+	93030	94882	118	69	-1.72414	0.000304	Antisense	Direct
Y18D10A.17	chrI	+	12904458	12906217	138	68	-2.04082	1.29e-06	Antisense	Direct
F15E6.1	chrIV	+	4307751	4316759	93	67	-1.38889	0.0238	Antisense	Direct
C47D12.1	chrII	-	11661498	11675841	104	65	-1.5873	0.00183	Antisense	Direct
K12D12.1	chrII	+	11875072	11880504	129	65	-1.96078	6.08e-06	Antisense	Direct
F20D12.1	chrIV	+	7957562	7962104	169	64	-2.63158	1.57e-11	Antisense	Direct
R06C7.8	chrI	+	7251938	7255223	128	64	-2	5.11e-06	Antisense	Direct
Y39G10AR.13	chrI	-	2304716	2306787	159	64	-2.5	2.5e-10	Antisense	Direct
T12D8.1	chrIII	+	13643797	13656517	106	63	-1.69492	0.000813	Antisense	Direct
C16C10.3	chrIII	-	4172306	4176132	136	59	-2.27273	4.29e-08	Antisense	Direct
F34D10.4	chrIII	+	3736602	3739351	136	58	-2.32558	3.98e-08	Antisense	Direct
M04B2.1	chrIV	+	11524612	11527927	138	58	-2.38095	2.12e-08	Antisense	Direct
C01A2.1	chrI	-	13408784	13410495	86	57	1.5	0.0156921	Sense	Inverse
Y63D3A.5	chrI	+	14102033	14104196	81	57	-1.42857	0.0276	Antisense	Direct
Y17D7C.1	chrV	+	18707975	18711609	35	56	1.6	0.0257	Antisense
C47B2.3	chrI	-	12964801	12966251	119	55	-2.17391	9.64e-07	Antisense
F52D2.8	chrX	+	1983708	1984828	33	55	1.66	0.0192	Antisense	Inverse
ZC155.3	chrIII	-	5203671	5206870	119	55	-2.17391	9.64e-07	Antisense
F28H1.3	chrI	+	3983206	3986386	145	53	-2.7027	1.74e-10	Antisense	Direct
K01G5.7	chrIII	-	10740862	10742307	103	53	-1.92308	5.85e-05	Antisense	Direct
Y43F4B.6	chrIII	-	13302900	13307072	120	53	-2.22222	4.19e-07	Antisense
C18G1.5	chrV	+	4754338	4755286	85	51	-1.66667	0.003	Antisense
C26E6.9	chrIII	-	4922408	4930167	91	51	-1.78571	0.000576	Antisense
F41H10.10	chrIV	-	5390347	5391546	98	51	-1.92308	9.45e-05	Antisense
Y17G7A.1	chrII	+	11916429	11917427	124	51	-2.43902	5.92e-08	Antisense	Direct
ZK381.4	chrIV	-	6974425	6977129	117	51	-2.27273	3.61e-07	Antisense	Direct
T10B5.6	chrV	+	1869213	1870556	96	50	-1.92308	0.000141	Antisense	Direct
T21G5.3	chrI	+	6854686	6857528	104	50	-2.08333	1.57e-05	Antisense	Direct
T27F6.4	chrI	+	12484169	12486450	121	50	-2.43902	8.71e-08	Antisense	Direct
C16A11.4	chrII	+	4227039	4229126	107	49	-2.17391	3.96e-06	Antisense	Direct
K02E2.6	chrV	+	20376056	20376797	86	49	1.75	0.00238858	Sense	Inverse
C10H11.10	chrI	-	4759818	4761324	103	48	-2.17391	5.51e-06	Antisense	Direct
D2045.2	chrIII	-	10452605	10460335	87	48	-1.81818	0.000486	Antisense	Direct
F21G4.2	chrX	+	9884256	9889638	121	48	-2.5641	2.61e-08	Antisense	Direct
F48E8.6	chrIII	+	5443263	5446453	93	48	-1.96078	0.000132	Antisense
K07D4.3	chrII	-	4043210	4044318	111	48	-2.32558	4.56e-07	Antisense
Y14H12B.2	chrII	-	3932170	3933733	140	48	-2.94118	1.82e-11	Antisense	Direct
Y45G5AM.2	chrV	+	4175872	4181646	73	48	-1.53846	0.0148	Antisense	Direct
C10C5.1	chrIV	-	9359417	9366431	99	45	-2.17391	6.59e-06	Antisense
F13D12.5	chrII	+	11726732	11728347	87	45	-1.92308	0.000275	Antisense	Direct
F32D1.10	chrV	+	4347183	4349530	81	45	-1.78571	0.00127	Antisense	Direct
ZK1067.2	chrII	+	9215133	9222774	107	45	-2.38095	7.78e-07	Antisense	Direct
C50C3.6	chrIII	+	8164302	8172628	80	44	-1.81818	0.00111	Antisense	Direct
F49E8.1	chrIV	+	7556651	7559300	29	44	-1.53846	0.043926	Sense
R11A8.7	chrIV	+	10374959	10387268	76	44	-1.72414	0.00292	Antisense
T05G5.3	chrIII	+	9747373	9748568	111	44	-2.5	1.16e-07	Antisense
F01G10.1	chrIV	+	10243586	10245624	82	43	-1.92308	0.00044	Antisense	Direct
K08E7.3	chrIV	+	12567825	12570575	80	43	-1.88679	0.000741	Antisense	Direct
T21E12.4	chrI	+	4386787	4401981	117	43	-2.7027	7.77e-09	Antisense	Direct
ZK112.2	chrIII	+	7731314	7737999	106	43	-2.5	3.33e-07	Antisense
C05D11.11	chrIII	-	6440086	6442942	88	42	-2.12766	3.91e-05	Antisense
C06G3.2	chrIV	+	7040194	7043678	100	42	-2.38095	1.31e-06	Antisense	Direct
C27D9.1	chrII	+	4753442	4755581	94	42	-2.27273	8.7e-06	Antisense	Direct
F01G4.4	chrIV	+	11143316	11145895	100	42	-2.38095	1.31e-06	Antisense	Direct
F56A3.4	chrI	-	5171302	5175525	90	42	-2.17391	2.15e-05	Antisense
T12E12.2	chrIV	+	5544846	5548436	85	42	-2.04082	0.000124	Antisense
F31A9.4	chrX	+	1779433	1780523	26	41	-1.5625	0.0451619	Sense	Direct
C02F5.1	chrIII	+	8250555	8254242	81	40	-2	0.000239	Antisense
F38B7.5	chrV	+	11554779	11558101	78	40	-1.92308	0.00054	Antisense	Direct
W09D10.2	chrIII	-	10722039	10729325	79	40	-1.96078	0.000322	Antisense
Y22D7AL.5	chrIII	+	1619738	1625790	90	40	-2.22222	1.74e-05	Antisense	Direct
Y54E2A.3	chrII	-	14752788	14753796	70	40	-1.72414	0.00334	Antisense
ZK507.6	chrIII	-	9106626	9109183	61	40	-1.51515	0.0249	Antisense
C06A8.5	chrII	+	7781508	7783280	71	39	-1.81818	0.00218	Antisense	Direct
C47G2.5	chrII	+	11297616	11301181	87	39	-2.22222	2.56e-05	Antisense	Direct
F12F6.6	chrIV	-	11561948	11566161	82	39	-2.08333	8.57e-05	Antisense
K08D12.1	chrIV	-	1708801	1709743	71	39	-1.81818	0.00177	Antisense	Direct
T01E8.5	chrII	-	10242522	10247559	67	39	-1.69492	0.00477	Antisense	Direct
F26D10.3	chrIV	+	17278918	17281140	61	38	-1.6129	0.0158	Antisense	Direct
F26F12.7	chrV	+	5826843	5832677	63	38	-1.66667	0.0102	Antisense	Direct
Y60A3A.27	chrV	+	19957891	19959845	10	38	3.8	6.55e-05	Antisense
Y81G3A.3	chrII	+	13084076	13091394	85	38	-2.22222	2.77e-05	Antisense
F59D12.2	chrX	-	15672769	15675644	58	37	1.57	0.0263349	Sense	Inverse
T07C4.3	chrIII	+	10352077	10355010	57	37	-1.53846	0.027	Antisense	Direct
Y48B6A.3	chrII	+	14155670	14165921	69	37	-1.88679	0.00163	Antisense	Direct
D1081.7	chrI	+	8487612	8490933	68	36	-1.92308	0.00139	Antisense	Direct
F25D7.4	chrI	-	10418219	10422467	65	36	-1.81818	0.00249	Antisense	Direct
F44B9.3	chrIII	+	8010706	8013642	92	36	-2.5641	9.01e-07	Antisense	Direct
T09A5.10	chrII	+	7860589	7863356	76	36	-2.12766	0.000148	Antisense	Direct
Y48G9A.4	chrIII	+	2134462	2151527	73	36	-2.04082	0.000352	Antisense	Direct
C23G10.4	chrIII	+	6198845	6201990	63	34	-1.81818	0.00337	Antisense	Direct
C38D4.3	chrIII	+	4786043	4792355	58	34	-1.69492	0.0113	Antisense	Direct
F57B9.6	chrIII	+	6929974	6931889	63	34	-1.81818	0.00337	Antisense	Direct
Y57A10A.18	chrII	-	12209053	12221703	68	34	-1.96078	0.000723	Antisense
C44B11.6	chrIII	+	3152725	3153450	62	33	1.87	0.00410799	Sense	Inverse
F26H11.2	chrII	+	14390302	14407807	67	33	-2	0.000752	Antisense
F39E9.6	chrII	-	3310282	3311925	78	33	2.38	2.64e-05	Sense	Inverse
T05H10.5	chrII	+	8062672	8068038	62	33	-1.85185	0.0029	Antisense	Direct
T07C4.10	chrIII	+	10320949	10325546	69	33	-2.08333	0.000426	Antisense	Direct
Y65B4BR.4	chrI	+	537124	542202	59	33	-1.78571	0.00621	Antisense	Direct
ZK430.1	chrII	+	4425201	4432604	76	33	-2.27273	5.2e-05	Antisense	Direct
B0336.1	chrIII	+	5722799	5727065	65	32	-2.04082	0.00083	Antisense
F54D5.14	chrII	+	11578629	11582675	65	32	-2.04082	0.00083	Antisense
C46C2.1	chrIV	+	9200093	9212200	64	31	-2.08333	0.000688	Antisense	Direct
E01A2.6	chrI	-	4137166	4138953	79	31	-2.5641	4.49e-06	Antisense	Direct
F29B9.2	chrIV	+	4660983	4665186	71	31	-2.27273	8.31e-05	Antisense	Direct
F32D1.1	chrV	-	4341424	4346036	52	31	-1.69492	0.0138	Antisense	Direct
M03D4.1	chrIV	+	6118207	6121754	74	31	-2.38095	3.19e-05	Antisense
T11F8.3	chrIV	+	5470015	5473075	69	31	-2.22222	0.000155	Antisense	Direct
VF13D12L.1	chrII	-	11698331	11700178	75	31	-2.43902	1.74e-05	Antisense
Y45G12B.2	chrV	+	2694766	2698837	62	31	-2	0.00121	Antisense
Y48E1A.1	chrII	-	13670566	13694689	57	31	-1.85185	0.00394	Antisense	Direct
B0336.3	chrIII	+	5711498	5714738	58	30	-1.96078	0.00234	Antisense
C01G5.2	chrIV	-	6526709	6529786	67	30	-2.27273	0.000133	Antisense	Direct
C47E8.5	chrV	+	14686141	14688403	68	30	-2.27273	0.000123	Antisense	Direct
F10G7.3	chrII	+	4702056	4703200	94	30	-3.125	1.28e-08	Antisense	Direct
F22B5.7	chrII	+	8457748	8464448	102	30	-3.44828	5.5e-10	Antisense	Direct
F33H2.5	chrI	-	15005605	15013861	71	30	-2.38095	3.64e-05	Antisense
H02I12.1	chrIV	+	11372961	11377571	48	30	-1.6129	0.0283	Antisense	Direct
R119.7	chrI	+	364521	368511	53	30	-1.78571	0.00868	Antisense
T13F2.3	chrIV	-	9791917	9796563	58	30	-1.96078	0.00195	Antisense
Y110A7A.1	chrI	+	5165159	5171302	51	30	-1.72414	0.0142	Antisense
Y17G9B.9	chrIV	-	4758970	4760419	53	30	-1.78571	0.00743	Antisense	Direct
C06A1.1	chrII	-	10560253	10563311	60	29	-2.08333	0.00068	Antisense	Direct
C26D10.2	chrII	-	8326783	8328802	53	29	-1.85185	0.00495	Antisense	Direct
C38D4.4	chrIII	+	4793049	4795362	60	29	-2.08333	0.000832	Antisense	Direct
F56D12.5	chrII	+	1321040	1323093	48	29	-1.69492	0.0201	Antisense	Direct
F58G11.3	chrV	-	13669348	13671929	46	29	-1.6129	0.0282	Antisense
T03F1.9	chrI	-	3862776	3865940	58	29	-2.04082	0.00123	Antisense
T22D1.9	chrIV	-	6906619	6909888	69	29	-2.43902	3.92e-05	Antisense	Direct
W08F4.8	chrII	-	577836	580591	50	29	-1.75439	0.0108	Antisense
Y40B10A.8	chrV	-	2061132	2066844	60	29	-2.08333	0.00068	Antisense	Direct
Y71F9B.7	chrI	-	2755818	2758205	47	29	-1.63934	0.0223	Antisense
Y76A2B.1	chrIII	-	13514820	13523973	47	29	-1.63934	0.0223	Antisense	Direct
Y69A2AR.31	chrIV	-	2650380	2664569	8	28	-3.33333	0.00130135	Sense	Direct
C03B8.4	chrIII	-	7700265	7709400	61	27	-2.22222	0.000298	Antisense
C06A5.6	chrI	-	5983231	5985871	52	27	-1.88679	0.00424	Antisense
C18G1.4	chrV	+	4755970	4758569	77	27	-2.77778	1.68e-06	Antisense	Direct
C39E9.12	chrIV	+	13093979	13095348	53	27	-1.92308	0.0038	Antisense	Direct
F28D9.1	chrI	-	11177834	11182055	48	27	-1.75439	0.0122	Antisense	Direct
R10E11.1	chrIII	+	9766414	9774723	57	27	-2.08333	0.00123	Antisense	Direct
T01C3.3	chrV	-	14991684	14992653	48	27	-1.75439	0.0122	Antisense
Y116A8C.36	chrIV	+	17119639	17126194	63	27	-2.32558	0.000197	Antisense	Direct
Y17G7B.20	chrII	-	11977693	11979774	50	27	-1.81818	0.00725	Antisense	Direct
ZK328.5	chrIII	-	6013482	6017841	55	27	-2	0.00182	Antisense
B0523.5	chrIII	-	8675229	8683982	63	26	-2.38095	8.85e-05	Antisense
C08B11.3	chrII	-	8022564	8027687	50	26	-1.92308	0.00474	Antisense
C45G3.1	chrI	-	9221835	9226378	68	26	-2.63158	1.6e-05	Antisense
F42A9.2	chrIV	+	8620664	8626131	44	26	-1.69492	0.0254	Antisense
F54A3.1	chrII	+	2249407	2253961	51	26	-1.96078	0.00422	Antisense	Direct
F59A6.5	chrII	+	4999509	5003779	56	26	-2.12766	0.001	Antisense
R144.7	chrIII	-	5008900	5017613	60	26	-2.27273	0.000236	Antisense	Direct
T06A10.1	chrIV	-	16855006	16863402	59	26	-2.27273	0.000325	Antisense
T23G11.3	chrI	+	7695675	7698222	51	26	-1.96078	0.00422	Antisense	Direct
W02B12.2	chrII	-	11451400	11452871	54	26	-2.08333	0.00151	Antisense	Direct
B0414.5	chrI	-	5788637	5791755	70	25	-2.77778	3.97e-06	Antisense
C50F2.2	chrI	+	3881829	3888315	60	25	-2.38095	0.000166	Antisense	Direct
F20D12.1	chrIV	+	7957562	7962104	11	25	-2.32558	0.0145296	Sense	Direct
F28D1.10	chrIV	+	12404398	12408656	57	25	-2.27273	0.000435	Antisense	Direct
F55F10.1	chrIV	+	4360842	4386526	83	25	-3.33333	3.78e-08	Antisense	Direct
F55G1.4	chrIV	+	7478435	7485503	47	25	-1.88679	0.0081	Antisense
M117.2	chrIV	-	11820960	11821867	46	25	-1.85185	0.00917	Antisense	Direct
R08D7.6	chrIII	-	8974976	8981808	56	25	-2.22222	0.000489	Antisense	Direct
R31.2	chrV	+	11917540	11924629	51	25	-2.04082	0.00267	Antisense	Direct
T06E4.3	chrV	-	9634833	9645475	51	25	-2.04082	0.00225	Antisense	Direct
T09A5.11	chrII	+	7864437	7865937	60	25	-2.38095	0.000166	Antisense
T22F3.2	chrV	+	3586636	3589002	53	25	-2.12766	0.00148	Antisense	Direct
T24H7.1	chrII	+	6251363	6252802	64	25	-2.5641	4.35e-05	Antisense
Y37A1B.1	chrIV	+	14071515	14076711	63	25	-2.5	6.11e-05	Antisense	Direct
Y38A10A.5	chrV	-	6099154	6100492	41	25	-1.63934	0.0323	Antisense
C01G8.9	chrI	-	5300983	5310917	40	24	-1.69492	0.0288	Antisense
F20C5.3	chrIV	-	8753368	8754794	51	24	-2.12766	0.00137	Antisense	Direct
F22B3.4	chrIV	+	11410455	11412972	68	24	-2.85714	5.39e-06	Antisense
F46F11.9	chrI	-	5610381	5616405	43	24	-1.81818	0.0135	Antisense	Direct
F53G2.6	chrII	-	2460866	2472863	46	24	-1.92308	0.00595	Antisense
F54C8.4	chrIII	-	9441457	9443527	43	24	-1.81818	0.0135	Antisense	Direct
T01G1.3	chrIV	-	11365588	11371763	39	24	-1.63934	0.0366	Antisense	Direct
T20D3.11	chrIV	-	9343334	9355962	76	24	-3.22581	1.9e-07	Antisense
Y37A1C.1	chrIV	-	14110422	14116002	59	24	-2.5	0.000102	Antisense
C10H11.9	chrI	-	4738170	4744322	63	23	-2.77778	1.28e-05	Antisense
C48G7.3	chrV	-	14784157	14815578	51	23	-2.27273	0.000804	Antisense	Direct
F10E9.8	chrIII	-	8314264	8318507	45	23	-2	0.00501	Antisense
F11H8.4	chrIII	-	7023575	7029130	47	23	-2.08333	0.00278	Antisense	Direct
F40F11.2	chrIV	+	11594294	11601648	55	23	-2.43902	0.000265	Antisense
F44E7.4	chrV	-	5772813	5776934	51	23	-2.27273	0.000804	Antisense
F54B3.1	chrII	+	10251573	10268089	42	23	-1.85185	0.0132	Antisense
F59C12.4	chrX	-	16602361	16602634	37	23	-1.63934	0.0415	Antisense	Direct
K05C4.2	chrI	-	14720707	14721326	44	23	-1.96078	0.00666	Antisense	Direct
M110.4	chrII	+	8217162	8222302	48	23	-2.12766	0.00242	Antisense	Direct
T06D8.8	chrII	-	11237523	11238835	40	23	-1.78571	0.0197	Antisense	Direct
Y47G6A.28	chrI	+	3442189	3447705	62	23	-2.77778	2.36e-05	Antisense
Y48C3A.7	chrII	-	13311386	13320819	44	23	-1.96078	0.00666	Antisense
Y49E10.19	chrIII	-	12446233	12453082	52	23	-2.32558	0.000583	Antisense
Y54E10A.9	chrI	-	3158514	3162372	56	23	-2.5	0.000154	Antisense	Direct
Y57G11C.15	chrIV	-	14822495	14825139	48	23	-2.12766	0.00205	Antisense
Y65B4BL.2	chrI	+	506479	509059	53	23	-2.32558	0.00051	Antisense	Direct
ZC518.2	chrIV	-	12355591	12360760	57	23	-2.5	0.000109	Antisense
ZK520.4	chrIII	+	13687078	13692468	41	23	-1.81818	0.0172	Antisense
T16A1.8	chrII	-	2091743	2093850	46	22	2.11	0.00358609	Sense	Inverse
B0336.9	chrIII	-	5702293	5705409	36	21	-1.69492	0.037	Antisense
C09G4.5	chrIV	+	8511265	8513902	53	21	-2.5	0.000283	Antisense	Direct
C15H11.3	chrV	-	14412382	14415770	38	21	-1.78571	0.0223	Antisense	Direct
C16A11.3	chrII	+	4229544	4234317	52	21	-2.43902	0.000395	Antisense	Direct
C30C11.4	chrIII	-	8444177	8446806	37	21	-1.72414	0.0288	Antisense
C30G12.6	chrII	-	7292131	7295955	36	21	-1.69492	0.037	Antisense
C33H5.4	chrIV	+	7797103	7800425	63	21	-2.94118	8.11e-06	Antisense	Direct
C34D4.14	chrIV	-	7134329	7144547	66	21	-3.125	1.98e-06	Antisense	Direct
C49H3.11	chrIV	-	7925439	7926354	57	21	-2.63158	5.72e-05	Antisense	Direct
F14B4.3	chrI	-	9280969	9286553	49	21	-2.27273	0.000879	Antisense
F31E3.4	chrIII	-	6963558	6968050	46	21	-2.12766	0.00227	Antisense
F52B5.3	chrI	-	8318345	8323975	52	21	-2.43902	0.000326	Antisense
F52C9.8	chrIII	+	5311204	5321691	42	21	-1.96078	0.00855	Antisense	Direct
F56A3.3	chrI	+	5176468	5182738	57	21	-2.63158	7.15e-05	Antisense
F58E10.3	chrV	-	14008749	14012196	72	21	-3.33333	1.83e-07	Antisense	Direct
F59A2.1	chrIII	-	3400976	3404262	51	21	-2.38095	0.000456	Antisense	Direct
M02B7.5	chrIV	-	3807660	3819318	44	21	-2.04082	0.00416	Antisense
M106.4	chrII	-	10863614	10868730	44	21	-2.04082	0.00416	Antisense	Direct
T04A8.14	chrIII	-	4715256	4720629	60	21	-2.77778	1.92e-05	Antisense
T12F5.3	chrI	+	3727062	3730939	63	21	-2.94118	8.11e-06	Antisense	Direct
Y37E11B.4	chrIV	-	3584308	3593594	36	21	-1.69492	0.037	Antisense
Y38A8.3	chrII	-	4955631	4959861	50	21	-2.32558	0.000634	Antisense	Direct
Y43F11A.5	chrII	-	12114905	12130883	39	21	-1.81818	0.0171	Antisense	Direct
Y48G9A.1	chrIII	+	2174565	2197890	49	21	-2.27273	0.00105	Antisense
Y57G11C.11	chrIV	-	14793170	14796285	43	21	-2	0.00559	Antisense	Direct
Y62E10A.14	chrIV	-	13399067	13400476	68	21	-3.22581	9.06e-07	Antisense
ZK1055.1	chrV	+	6594208	6599123	10	21	-2.22222	0.0315379	Sense	Direct
ZK546.1	chrII	+	4949887	4953474	39	21	-1.81818	0.0193	Antisense
C23G10.8	chrIII	-	6202567	6206147	40	20	-1.96078	0.00836	Antisense
C26E6.4	chrIII	+	4939528	4944366	38	20	-1.88679	0.0166	Antisense
D2005.4	chrI	+	7815261	7820231	53	20	-2.63158	0.000151	Antisense	Direct
F49E8.3	chrIV	-	7543967	7547105	64	20	-3.125	1.98e-06	Antisense
T17E9.2	chrIII	-	6114426	6116273	42	20	-2.08333	0.00463	Antisense
T20G5.1	chrIII	+	10203714	10209598	44	20	-2.17391	0.00292	Antisense	Direct
Y106G6H.2	chrI	-	10433033	10435866	39	20	-1.92308	0.0111	Antisense	Direct
Y111B2A.14	chrIII	+	12626454	12651111	39	20	-1.92308	0.0126	Antisense	Direct
Y18D10A.13	chrI	+	12878583	12902770	39	20	-1.92308	0.0126	Antisense	Direct
Y18D10A.19	chrI	+	12918714	12919094	49	20	-2.43902	0.000591	Antisense	Direct
Y40B10A.1	chrV	+	2068448	2069143	41	20	-2.04082	0.00715	Antisense	Direct
Y46E12BL.2	chrII	+	15233054	15244833	42	20	-2.08333	0.00534	Antisense	Direct
Y54E2A.11	chrII	+	14795311	14798345	44	20	-2.17391	0.00292	Antisense	Direct
Y60A3A.12	chrV	-	19904498	19911361	63	20	-3.125	2.93e-06	Antisense	Direct
Y6D1A.1	chrII	-	11820499	11823534	42	20	-2.08333	0.00463	Antisense
Y75B8A.24	chrIII	-	12251371	12273560	40	20	-1.96078	0.00836	Antisense
Y75B8A.25	chrIII	+	12273919	12282101	36	20	-1.78571	0.0281	Antisense
ZC308.1	chrI	+	6369966	6386145	50	20	-2.5	0.000423	Antisense	Direct
ZK1067.3	chrII	+	9223189	9225099	44	20	-2.17391	0.00292	Antisense
ZK637.8	chrIII	+	8905524	8911657	46	20	-2.27273	0.00157	Antisense	Direct
C35D10.7	chrIII	+	4856155	4859199	41	19	-2.17391	0.00436	Antisense
CC8.2	chrIV	-	3645576	3648679	38	19	-2	0.00936	Antisense
F01F1.6	chrIII	+	5857160	5858901	47	19	-2.5	0.000633	Antisense	Direct
F11E6.7	chrIV	-	17457786	17461234	40	19	-2.08333	0.00515	Antisense
F23B12.8	chrV	-	14453379	14456693	56	19	-2.94118	2.04e-05	Antisense	Direct
F28C6.2	chrII	+	8594279	8596037	33	19	-1.72414	0.0409	Antisense	Direct
F38A5.2	chrIV	-	6582686	6585384	46	19	-2.43902	0.000745	Antisense	Direct
F55G1.8	chrIV	-	7471046	7473193	35	19	-1.85185	0.0218	Antisense
F56C9.1	chrIII	+	7336513	7343559	36	19	-1.88679	0.0186	Antisense	Direct
F57B9.2	chrIII	+	6946700	6958814	55	19	-2.85714	3.72e-05	Antisense	Direct
F58G11.2	chrV	+	13665382	13669266	35	19	-1.85185	0.0243	Antisense
H15N14.2	chrI	-	7766531	7772225	33	19	-1.72414	0.0371	Antisense
K05C4.5	chrI	+	14742751	14747777	39	19	-2.04082	0.00794	Antisense
K07C5.4	chrV	-	10350442	10352950	36	19	-1.88679	0.0166	Antisense	Direct
R05D3.7	chrIII	-	8351167	8355093	32	19	-1.69492	0.0477	Antisense	Direct
R12B2.5	chrIII	-	5828507	5833697	65	19	-3.44828	5.84e-07	Antisense
T16H12.11	chrIII	-	10087116	10088439	51	19	-2.7027	0.00013	Antisense
Y111B2A.22	chrIII	+	12714445	12743809	37	19	-1.96078	0.0141	Antisense	Direct
Y39G10AR.18	chrI	-	2382965	2401489	8	19	2.38	0.036	Antisense	Inverse
Y43F8C.6	chrV	-	19633024	19640871	48	19	-2.5	0.000376	Antisense
Y45F10A.2	chrIV	-	13510485	13512113	37	19	-1.96078	0.0125	Antisense	Direct
Y79H2A.11	chrIII	+	12061619	12072157	34	19	-1.78571	0.0317	Antisense	Direct
C05C8.4	chrV	-	7226359	7230830	60	18	-3.33333	1.92e-06	Antisense
C08B11.9	chrII	-	8034265	8038097	31	18	-1.72414	0.0421	Antisense
C08H9.2	chrII	-	9886467	9891003	31	18	-1.72414	0.0421	Antisense	Direct
C09H10.7	chrII	+	11108147	11109507	31	18	-1.72414	0.0462	Antisense
C36E8.5	chrIII	-	4016041	4017598	36	18	-2	0.0105	Antisense
C50F4.11	chrV	-	9541755	9544199	39	18	-2.17391	0.00418	Antisense	Direct
E02H9.6	chrIII	-	2436092	2442316	44	18	2.44	0.00116917	Sense	Inverse
F10G7.1	chrII	+	4710281	4713501	48	18	-2.7027	0.000237	Antisense	Direct
F18E2.3	chrV	+	12763923	12767905	35	18	-1.96078	0.0157	Antisense	Direct
F26A3.3	chrI	-	7650412	7656331	36	18	-2	0.0105	Antisense
F29C12.5	chrII	+	13122945	13124697	37	18	-2.08333	0.0088	Antisense	Direct
F31C3.2	chrI	+	15036359	15040474	33	18	-1.85185	0.0274	Antisense
F33H1.4	chrII	+	10174569	10180048	41	18	-2.32558	0.00255	Antisense
F59A2.3	chrIII	+	3396575	3397435	31	18	-1.72414	0.0462	Antisense	Direct
K01C8.5	chrII	-	8273534	8275953	37	18	-2.08333	0.00776	Antisense
R119.4	chrI	-	373573	381905	40	18	-2.22222	0.00304	Antisense	Direct
R13A5.12	chrIII	+	7573276	7575063	33	18	-1.85185	0.0274	Antisense
W02B12.3	chrII	+	11453895	11455723	35	18	-1.96078	0.0157	Antisense	Direct
Y17D7C.1	chrV	+	18707975	18711609	42	18	2.31	0.00296512	Sense
Y75B8A.22	chrIII	-	12240354	12250034	31	18	-1.72414	0.0421	Antisense	Direct
ZK328.1	chrIII	+	6020111	6024600	49	18	-2.77778	0.000166	Antisense
ZK328.2	chrIII	+	6009508	6012786	33	18	-1.85185	0.0274	Antisense
C03D6.4	chrI	-	9660166	9664903	33	17	-2	0.0158	Antisense
C06G4.1	chrIII	+	7987057	7990478	34	17	-2.04082	0.0131	Antisense
C13G3.3	chrV	-	11027158	11029364	31	17	-1.85185	0.0279	Antisense
C16A3.3	chrIII	+	6383493	6389343	30	17	-1.81818	0.0403	Antisense
C24H11.7	chrIII	-	11751508	11773542	40	17	-2.38095	0.00172	Antisense	Direct
C25A1.10	chrI	-	10187539	10190885	48	17	-2.85714	9.76e-05	Antisense
C25G4.5	chrIV	-	12445955	12451264	41	17	-2.43902	0.00122	Antisense
C32E8.8	chrI	-	3789320	3792799	39	17	-2.32558	0.0024	Antisense
C39B5.2	chrIII	+	2233875	2236970	43	17	2.52	0.00121316	Sense	Inverse
F35G12.8	chrIII	+	4587472	4593089	32	17	-1.92308	0.0234	Antisense
F37D6.1	chrI	-	10479291	10485638	55	17	-3.33333	6.34e-06	Antisense
F57C9.5	chrI	+	4827072	4829769	48	17	-2.85714	0.000119	Antisense	Direct
K08E3.6	chrIII	-	13768680	13771103	30	17	-1.81818	0.0367	Antisense
T01C3.7	chrV	-	15000743	15001944	38	17	-2.27273	0.00334	Antisense
T06E4.1	chrV	+	9645812	9650270	44	17	-2.63158	0.000506	Antisense
T07D4.4	chrII	+	8884829	8889590	32	17	-1.92308	0.0234	Antisense	Direct
T21B10.2	chrII	+	8930922	8933698	30	17	-1.81818	0.0403	Antisense
Y39E4B.2	chrIII	-	13165616	13169391	42	17	-2.5	0.000864	Antisense
Y41E3.10	chrIV	+	15037291	15039473	32	17	-1.92308	0.0234	Antisense
C04D8.1	chrIII	+	8497540	8518793	36	15	-2.32558	0.00418	Antisense	Direct
C07G2.2	chrIII	-	4491599	4508083	30	15	-1.92308	0.0238	Antisense	Direct
C29E4.4	chrIII	+	7928977	7932922	35	15	-2.27273	0.00577	Antisense	Direct
C47E8.8	chrV	+	14696996	14707570	34	15	-2.22222	0.00792	Antisense
C52E12.4	chrII	-	7012740	7022448	49	15	-3.125	3.11e-05	Antisense
C53D5.6	chrI	-	310981	314990	44	15	-2.85714	0.000214	Antisense	Direct
D1044.6	chrIII	-	5535621	5543124	31	15	-2	0.0177	Antisense	Direct
F01G4.1	chrIV	+	11125995	11131140	28	15	-1.81818	0.0455	Antisense
F09G2.2	chrV	+	7196896	7198417	45	15	-2.94118	0.000177	Antisense	Direct
F46F11.2	chrI	+	5619604	5620498	37	15	-2.38095	0.003	Antisense	Direct
F53G12.1	chrI	-	108681	110057	28	15	-1.81818	0.0417	Antisense
F54E12.2	chrIV	-	11333212	11336834	31	15	-2	0.0177	Antisense	Direct
F56F3.1	chrIII	-	4471374	4475111	52	15	-3.33333	9.31e-06	Antisense	Direct
F59A3.2	chrI	+	5512050	5516028	49	15	-3.125	3.83e-05	Antisense
K01G5.5	chrIII	+	10748323	10749810	32	15	-2.08333	0.0146	Antisense
K09B11.9	chrIV	-	13445999	13454766	34	15	-2.22222	0.00702	Antisense	Direct
R05F9.11	chrII	-	4911854	4914202	30	15	-1.92308	0.0238	Antisense
R166.5	chrII	-	10542365	10548831	31	15	-2	0.0177	Antisense	Direct
T05F1.6	chrI	+	9626252	9631162	35	15	-2.27273	0.00577	Antisense
T05G5.7	chrIII	+	9758806	9760289	30	15	-1.92308	0.0262	Antisense	Direct
T14G10.2	chrIV	-	10164351	10174301	39	15	-2.5	0.00131	Antisense
T14G10.5	chrIV	+	10151919	10155608	33	15	-2.12766	0.0108	Antisense
T19H12.2	chrV	+	4890414	4891408	4	15	-4.16667	0.00902674	Sense	Direct
T23G7.1	chrII	+	9169829	9172483	34	15	-2.22222	0.00792	Antisense	Direct
T26A5.5	chrIII	+	6454424	6459952	34	15	-2.22222	0.00792	Antisense	Direct
W03G1.6	chrIV	-	506749	519456	46	15	-2.94118	0.0001	Antisense	Direct
W05B10.1	chrV	-	12659684	12660309	33	15	-2.12766	0.00963	Antisense
Y38F1A.10	chrII	-	13014239	13025746	29	15	-1.88679	0.0316	Antisense
Y41D4B.19	chrIV	-	1567918	1595822	29	15	-1.88679	0.0316	Antisense	Direct
Y43F4B.6	chrIII	-	13302900	13307072	5	15	-3.125	0.0230476	Sense
Y47D3A.29	chrIII	+	11142329	11154033	32	15	-2.08333	0.0146	Antisense	Direct
Y55B1AR.2	chrIII	-	587189	598114	38	15	-2.43902	0.00186	Antisense
Y57A10A.31	chrII	+	12289319	12298999	31	15	-2	0.0197	Antisense
ZK742.1	chrV	+	7805044	7814613	31	15	-2	0.0197	Antisense
B0379.3	chrI	+	10080146	10085692	31	14	-2.17391	0.0119	Antisense
C05D2.6	chrIII	-	5600390	5603610	32	14	-2.22222	0.00776	Antisense
C25A1.8	chrI	-	10184466	10185457	29	14	-2.04082	0.0199	Antisense
F11A10.4	chrIV	+	12096748	12105732	28	14	-1.96078	0.0294	Antisense
F25B5.2	chrIII	+	5959253	5961982	38	14	-2.63158	0.00114	Antisense	Direct
F40H6.1	chrIII	+	6057002	6058390	33	14	-2.32558	0.00631	Antisense
F46E10.10	chrV	-	6515402	6516509	28	14	-1.96078	0.0268	Antisense
F55A12.8	chrI	-	5349655	5353770	34	14	-2.38095	0.00399	Antisense
F57B1.2	chrV	-	13191690	13193519	36	14	-2.5	0.002	Antisense
F57C9.7	chrI	-	4825169	4826634	33	14	-2.32558	0.00559	Antisense
F59D12.2	chrX	-	15672769	15675644	5	14	2.85	0.0383	Antisense	Inverse
F59E12.9	chrII	-	5640050	5647014	39	14	-2.7027	0.000681	Antisense	Direct
H04D03.2	chrIII	-	10438077	10442292	34	14	-2.38095	0.00399	Antisense
H37A05.1	chrV	-	13650286	13654111	36	14	-2.5	0.002	Antisense
K04D7.1	chrIV	+	10176680	10177801	27	14	-1.88679	0.0391	Antisense	Direct
K08E4.1	chrIV	+	12051456	12055756	27	14	-1.88679	0.0391	Antisense
M4.1	chrIV	+	3213767	3217664	44	14	-3.125	0.000123	Antisense
R05D3.11	chrIII	+	8375218	8380768	53	14	-3.7037	3.25e-06	Antisense
T07A9.9	chrIV	+	394016	396441	32	14	-2.22222	0.00871	Antisense
T08G11.1	chrI	-	8905631	8916797	31	14	-2.17391	0.0107	Antisense	Direct
T10G3.5	chrV	-	13491048	13497353	36	14	-2.5	0.002	Antisense
T24B8.7	chrII	-	9042695	9053127	30	14	-2.08333	0.0147	Antisense	Direct
W01B11.3	chrI	+	3267094	3269120	39	14	-2.7027	0.000796	Antisense
Y39A3CL.7	chrIII	+	1824907	1876744	36	14	-2.5	0.0023	Antisense	Direct
Y43B11AR.4	chrIV	-	7083718	7084645	28	14	-1.96078	0.0268	Antisense	Direct
Y53H1C.2	chrI	-	11400602	11416411	26	14	-1.81818	0.0475	Antisense
Y6B3A.1	chrI	-	13603889	13626213	26	14	-1.81818	0.0475	Antisense	Direct
B0207.4	chrI	+	5937478	5938883	30	13	-2.27273	0.00956	Antisense
B0261.1	chrI	+	5263696	5268385	29	13	-2.22222	0.0132	Antisense
C07H6.5	chrIII	-	7496185	7497718	37	13	-2.85714	0.000713	Antisense	Direct
C27H6.2	chrV	-	9978765	9980741	30	13	-2.27273	0.00856	Antisense
C38D4.5	chrIII	+	4796877	4802540	35	13	-2.7027	0.00172	Antisense
C55B7.11	chrI	-	6511609	6513843	31	13	-2.38095	0.00612	Antisense
D2096.8	chrIV	-	8377686	8379301	54	13	-4.16667	6.39e-07	Antisense	Direct
DY3.2	chrI	+	8763048	8765177	32	13	-2.43902	0.00491	Antisense
F07E5.8	chrII	-	2072361	2075831	35	13	-2.7027	0.0015	Antisense
F10F2.1	chrIII	-	4596107	4612302	31	13	-2.38095	0.00612	Antisense
F22B7.13	chrIII	+	8628842	8630685	2	13	-5.55556	0.00820684	Sense
F29G9.2	chrV	+	6018976	6026320	27	13	-2.08333	0.0245	Antisense	Direct
F36A2.13	chrI	-	8828409	8838585	47	13	-3.57143	1.31e-05	Antisense
F37H8.2	chrII	-	11171665	11175402	38	13	-2.94118	0.000489	Antisense	Direct
F41F3.6	chrV	-	4658939	4662486	4	13	3.27	0.0321	Antisense
H27M09.3	chrI	+	6847509	6849922	42	13	-3.22581	0.000123	Antisense	Direct
H35N09.2	chrX	-	8603463	8606162	25	13	1.92	0.0469443	Sense	Inverse
K03H1.2	chrIII	-	9952084	9956109	30	13	-2.27273	0.00856	Antisense
K10E9.1	chrI	+	189653	202489	32	13	-2.43902	0.00491	Antisense	Direct
PAR2.4	chrIII	-	8763197	8767249	28	13	-2.12766	0.0164	Antisense
R01B10.5	chrV	-	6048543	6051214	30	13	-2.27273	0.00856	Antisense	Direct
R13H8.1	chrI	+	10750620	10776665	32	13	-2.43902	0.00491	Antisense	Direct
T08B2.9	chrI	-	6211987	6214588	30	13	-2.27273	0.00856	Antisense	Direct
T18H9.7	chrV	-	9213729	9217216	36	13	-2.77778	0.00104	Antisense
T24D1.3	chrI	-	9958773	9960144	26	13	-2	0.0303	Antisense
T28B11.1	chrV	-	10712136	10715223	26	13	-2	0.0303	Antisense	Direct
W06A7.3	chrV	-	14829169	14847290	27	13	-2.08333	0.0224	Antisense
W07E6.4	chrII	+	484864	490402	34	13	-2.63158	0.00245	Antisense
Y111B2A.11	chrIII	-	12599183	12608347	40	13	-3.0303	0.000226	Antisense	Direct
Y2H9A.1	chrV	-	13433037	13437526	44	13	-3.33333	4.56e-05	Antisense
Y53C12A.1	chrII	-	9713658	9716389	28	13	-2.12766	0.0164	Antisense	Direct
Y55D9A.1	chrIV	-	12605668	12614689	29	13	-2.22222	0.0119	Antisense
Y57A10A.27	chrII	-	12269735	12274959	30	13	-2.27273	0.00856	Antisense
Y59A8B.6	chrV	+	18022451	18042190	33	13	-2.5	0.00348	Antisense	Direct
ZK1098.8	chrIII	-	9538930	9542256	44	13	-3.33333	4.56e-05	Antisense	Direct
ZK637.7	chrIII	-	8900143	8904038	31	13	-2.38095	0.00612	Antisense
B0035.6	chrIV	+	11320770	11323604	24	12	-2	0.0371	Antisense
C04A2.3	chrII	+	6834958	6847844	24	12	-2	0.0371	Antisense	Direct
C10F3.1	chrV	+	5996339	5999266	38	12	-3.22581	0.000268	Antisense
C27A2.6	chrII	-	5078219	5081145	32	12	-2.7027	0.00229	Antisense
C31H1.8	chrIV	-	5811638	5814125	28	12	-2.38095	0.00941	Antisense
C56G2.1	chrIII	+	6362923	6366602	35	12	-2.94118	0.000856	Antisense
F07C6.4	chrIV	+	12817029	12830069	25	12	-2.08333	0.0274	Antisense	Direct
F08F8.2	chrIII	+	7359422	7362026	33	12	-2.77778	0.00181	Antisense
F10G7.2	chrII	+	4706831	4709762	30	12	-2.5	0.00528	Antisense
F11G11.7	chrII	+	4852043	4857789	24	12	-2	0.0371	Antisense
F49D11.10	chrI	-	10926903	10933696	28	12	-2.38095	0.00941	Antisense	Direct
F53F4.11	chrV	-	13622287	13624503	23	12	-1.92308	0.0462	Antisense	Direct
F54C9.8	chrII	+	8575471	8577653	25	12	-2.08333	0.0274	Antisense
F55A11.2	chrV	+	11764881	11767198	4	12	2.97	0.0497	Antisense
H04J21.3	chrIII	+	2347576	2362042	24	12	-2	0.0371	Antisense	Direct
H19N07.1	chrV	-	11110424	11113047	32	12	-2.7027	0.00229	Antisense	Direct
H19N07.2	chrV	+	11113890	11118739	38	12	-3.22581	0.000268	Antisense
K05C4.1	chrI	-	14719342	14720449	23	12	-1.92308	0.0462	Antisense
M03C11.3	chrIII	+	10404959	10414590	4	12	-3.33333	0.0342136	Sense
R07G3.3	chrII	+	7599587	7607945	31	12	-2.63158	0.00372	Antisense
R148.3	chrIII	+	3175327	3183596	39	12	-3.33333	0.00018	Antisense	Direct
R74.8	chrIII	+	4206249	4208238	25	12	-2.08333	0.0274	Antisense	Direct
T01G9.5	chrI	+	8294870	8296902	41	12	-3.44828	8.05e-05	Antisense
T05H10.1	chrII	+	8042518	8047379	33	12	-2.77778	0.00181	Antisense
T07F8.3	chrII	+	7132581	7137398	25	12	-2.08333	0.0274	Antisense	Direct
T08B2.5	chrI	+	6215792	6219913	24	12	-2	0.0371	Antisense	Direct
T21B10.3	chrII	+	8934301	8938953	26	12	-2.17391	0.02	Antisense
Y105E8A.9	chrI	+	14406014	14417920	24	12	-2	0.0371	Antisense
Y106G6D.7	chrI	+	10122459	10130194	31	12	-2.63158	0.00372	Antisense
Y22D7AL.5	chrIII	+	1619738	1625790	4	12	-3.33333	0.0342136	Sense	Direct
Y53C10A.12	chrI	-	11953501	11961976	26	12	-2.17391	0.0182	Antisense	Direct
Y53C12B.1	chrII	-	9743052	9745989	39	12	-3.33333	0.000152	Antisense
Y53F4B.22	chrII	+	15120202	15123247	28	12	-2.38095	0.0105	Antisense
Y54E5A.4	chrI	-	14701296	14706507	23	12	-1.92308	0.0462	Antisense
Y55B1AL.3	chrIII	-	577843	587102	25	12	-2.08333	0.0251	Antisense
ZK381.1	chrIV	+	6977502	6978927	27	12	-2.27273	0.0145	Antisense
3R5.1	chrIII	+	13780107	13781013	1	11	10.7	0.00537	Antisense
B0348.6	chrV	-	6588	7822	31	11	-2.85714	0.00165	Antisense
C02F4.1	chrIV	+	10484081	10492924	36	11	-3.33333	0.000265	Antisense
C13B9.3	chrIII	-	6622615	6624912	26	11	-2.43902	0.0103	Antisense
C14B9.8	chrIII	-	8139535	8144554	33	11	-3.125	0.000758	Antisense
C16C10.11	chrIII	+	4152029	4152658	28	11	-2.63158	0.00565	Antisense	Direct
C27D11.1	chrIII	-	7824310	7828553	27	11	-2.5	0.00725	Antisense
C32E8.11	chrI	-	3807474	3816798	25	11	-2.32558	0.0145	Antisense
D1007.7	chrI	-	4597940	4602667	28	11	-2.63158	0.00506	Antisense
D2045.1	chrIII	+	10461513	10467936	26	11	-2.43902	0.0114	Antisense	Direct
D2085.5	chrII	-	8669074	8677176	22	11	-2.04082	0.0386	Antisense
F20H11.2	chrIII	-	6592709	6598470	29	11	-2.7027	0.00351	Antisense	Direct
F22D3.2	chrII	+	6928706	6947823	24	11	-2.22222	0.0222	Antisense
F25B3.1	chrV	+	9550616	9556002	23	11	-2.12766	0.0306	Antisense
F25H2.11	chrI	+	10569122	10569923	25	11	-2.32558	0.016	Antisense
F41C3.4	chrII	+	4740433	4741556	23	11	-2.12766	0.0306	Antisense
F45H11.3	chrI	+	10374803	10380738	22	11	-2.04082	0.0417	Antisense
F56D1.7	chrII	+	5456277	5458578	26	11	-2.43902	0.0114	Antisense
F57C9.2	chrI	+	4844908	4847917	30	11	-2.77778	0.00273	Antisense
F57H12.1	chrIV	+	7982508	7983913	24	11	-2.22222	0.0222	Antisense	Direct
F58G11.5	chrV	-	13676095	13678563	26	11	-2.43902	0.0103	Antisense
H25P06.2	chrI	+	11323518	11333132	43	11	-4	1.4e-05	Antisense	Direct
K04F10.7	chrI	+	6366362	6368085	25	11	-2.32558	0.016	Antisense	Direct
K11D12.2	chrV	+	5050159	5051788	25	11	-2.32558	0.016	Antisense
K12H4.8	chrIII	-	8071841	8080200	32	11	-3.0303	0.00112	Antisense	Direct
M7.2	chrIV	+	11084076	11086019	32	11	-3.0303	0.00128	Antisense
R05D11.9	chrI	+	8593019	8596218	23	11	-2.12766	0.0306	Antisense
R05D3.2	chrIII	+	8372173	8375084	35	11	-3.22581	0.000396	Antisense
T05B9.1	chrII	-	11260003	11261173	23	11	-2.12766	0.0281	Antisense
T05C12.6	chrII	-	8182256	8184938	25	11	-2.32558	0.0145	Antisense
T06E6.1	chrV	-	15393093	15394931	33	11	-3.125	0.000758	Antisense
T11G6.5	chrIV	-	10835798	10842727	27	11	-2.5	0.00725	Antisense
W02A11.1	chrI	-	12730011	12732694	25	11	-2.32558	0.0145	Antisense
W09D10.1	chrIII	-	10737132	10739660	23	11	-2.12766	0.0281	Antisense	Direct
Y105E8B.4	chrI	+	14647768	14651427	30	11	-2.77778	0.00273	Antisense
Y17G7B.5	chrII	-	12001432	12006540	31	11	-2.85714	0.00165	Antisense
Y18D10A.11	chrI	-	12861960	12863521	38	11	-3.57143	9.87e-05	Antisense
Y39G10AR.12	chrI	-	2297280	2300086	23	11	-2.12766	0.0281	Antisense
Y48G1BL.2	chrI	+	203036	208397	27	11	-2.5	0.00805	Antisense
Y54F10BM.2	chrIII	+	2314422	2326890	23	11	-2.12766	0.0306	Antisense
ZK1248.14	chrII	-	5833295	5836171	24	11	-2.22222	0.0203	Antisense
ZK20.5	chrII	+	11653042	11654009	26	11	-2.43902	0.0114	Antisense
B0334.5	chrII	+	11496695	11499540	26	10	-2.7027	0.006	Antisense
B0336.2	chrIII	+	5716063	5717534	31	10	-3.22581	0.000876	Antisense
C05D11.11	chrIII	-	6440086	6442942	2	10	-4.16667	0.0365227	Sense
C12D8.1	chrV	-	10236131	10238831	22	10	-2.32558	0.0226	Antisense	Direct
C14C10.5	chrV	+	12600263	12607283	25	10	-2.63158	0.00864	Antisense	Direct
C41G7.3	chrI	-	9514991	9518725	40	10	-4.16667	1.62e-05	Antisense
C49H3.9	chrIV	-	7907075	7909457	27	10	-2.85714	0.0037	Antisense
D1043.1	chrII	+	11582761	11588441	24	10	-2.5	0.0123	Antisense	Direct
D2013.8	chrII	+	9333934	9338817	21	10	-2.22222	0.0341	Antisense	Direct
F07A11.3	chrII	-	11596680	11599723	23	10	-2.43902	0.016	Antisense
F10B5.6	chrII	-	8159858	8162099	28	10	-2.94118	0.00252	Antisense	Direct
F13D12.4	chrII	+	11728864	11731137	24	10	-2.5	0.0123	Antisense	Direct
F17C11.9	chrV	+	10965694	10967907	23	10	-2.43902	0.0175	Antisense	Direct
F25B4.5	chrV	-	5678857	5682614	24	10	-2.5	0.0112	Antisense
F41E6.13	chrV	-	8629199	8631302	25	10	-2.63158	0.00782	Antisense
F45F2.10	chrV	-	8513555	8518292	22	10	-2.32558	0.0226	Antisense
F49C12.12	chrIV	-	9320098	9321068	21	10	-2.22222	0.0315	Antisense
F57B9.10	chrIII	-	6959050	6961962	23	10	-2.43902	0.016	Antisense
F57B9.5	chrIII	+	6931940	6933500	27	10	-2.85714	0.00414	Antisense
K05C4.7	chrI	+	14737689	14738722	21	10	-2.22222	0.0341	Antisense	Direct
K08H10.2	chrV	+	10022469	10028131	20	10	-2.08333	0.0469	Antisense	Direct
T04C12.5	chrV	-	11076719	11078131	28	10	-2.94118	0.00252	Antisense
T15H9.2	chrII	-	9615924	9617045	2	10	4.76	0.0331	Antisense
Y105E8A.19	chrI	-	14476708	14486749	22	10	-2.32558	0.0226	Antisense
Y110A7A.13	chrI	-	5103633	5104915	20	10	-2.08333	0.0436	Antisense
Y22D7AL.7	chrIII	+	1576745	1580784	23	10	-2.43902	0.0175	Antisense
Y39B6A.35	chrV	+	18998309	19000864	22	10	-2.32558	0.0245	Antisense	Direct
Y45G5AM.8	chrV	-	4170105	4175611	31	10	-3.22581	0.000766	Antisense
Y47A7.1	chrV	+	5204464	5213405	27	10	-2.85714	0.00414	Antisense
Y47G6A.23	chrI	-	3565041	3578690	24	10	-2.5	0.0112	Antisense
Y54E10A.11	chrI	-	3176421	3192731	22	10	-2.32558	0.0226	Antisense
Y54E10A.15	chrI	-	3223154	3228023	22	10	-2.32558	0.0226	Antisense
Y71F9AL.17	chrI	-	2895328	2900861	25	10	-2.63158	0.00782	Antisense
Y74C10AR.1	chrI	+	2485869	2489716	21	10	-2.22222	0.0341	Antisense
Y82E9BL.18	chrIII	+	1328633	1333667	1	10	9.51	0.0106	Antisense
Y92H12BR.3	chrI	+	1416591	1425131	28	10	-2.94118	0.00284	Antisense
ZK328.5	chrIII	-	6013482	6017841	2	10	-4.16667	0.0365227	Sense
F52C12.4	chrIV	+	1923569	1946202	32	9	3.57	0.000442268	Sense	Inverse
B0546.2	chrIV	-	3373626	3378100	21	8	-2.5	0.0175	Antisense
C05C10.2	chrII	+	9922169	9930752	19	8	-2.27273	0.0379	Antisense
C05D2.5	chrIII	+	5604413	5607403	24	8	-2.85714	0.0063	Antisense	Direct
C10C6.1	chrIV	+	11436617	11447021	23	8	-2.77778	0.00918	Antisense
C18A3.5	chrII	-	5712808	5714792	18	8	-2.17391	0.0493	Antisense
C24H12.12	chrII	-	433657	435405	0	8	8.32	0.00455	Antisense
C26E6.3	chrIII	+	4944474	4947268	35	8	-4.16667	6.58e-05	Antisense
C37H5.6	chrV	-	4818751	4823330	20	8	-2.38095	0.025	Antisense	Direct
C38C10.5	chrIII	+	9394046	9404330	40	8	-4.7619	6.84e-06	Antisense
C43E11.10	chrI	-	4268071	4270288	21	8	-2.5	0.0175	Antisense
F01G4.6	chrIV	-	11146911	11149478	32	8	-3.84615	0.00021	Antisense
F10B5.7	chrII	+	8162487	8168577	24	8	-2.85714	0.0063	Antisense
F30F8.1	chrI	-	7832705	7835398	38	8	-4.54545	1.43e-05	Antisense
F57C7.1	chrX	+	10569202	10575648	19	8	-2.27273	0.0379	Antisense
F59E12.1	chrII	+	5654486	5657343	20	8	-2.38095	0.027	Antisense	Direct
H06O01.1	chrI	-	7016135	7020786	18	8	-2.17391	0.0493	Antisense
K07C5.8	chrV	+	10362296	10365986	33	8	-4	0.000158	Antisense
K07F5.13	chrIV	+	9858458	9861718	26	8	-3.125	0.0029	Antisense
M88.5	chrIII	+	4553635	4560392	22	8	-2.63158	0.0133	Antisense
R01H10.7	chrIII	-	10261652	10267275	28	8	-3.33333	0.00115	Antisense
R02F2.1	chrIII	+	5501818	5506354	19	8	-2.27273	0.0379	Antisense	Direct
R07E5.3	chrIII	+	4404756	4406256	20	8	-2.38095	0.027	Antisense
R74.3b.1	chrIII	+	4193793	4195329	20	8	-2.38095	0.027	Antisense
T02E1.3	chrI	+	8214402	8217978	19	8	-2.27273	0.0379	Antisense	Direct
T23G11.1	chrI	-	7701411	7702030	1	8	8.32	0.0217	Antisense
T23H2.1	chrI	+	6447333	6453944	20	8	-2.38095	0.027	Antisense
W02A2.7	chrIV	+	13353690	13356072	37	8	-4.54545	2.69e-05	Antisense	Direct
W06B4.3	chrII	+	4461420	4467886	19	8	-2.27273	0.0379	Antisense
W08D2.5	chrIV	-	9817395	9824606	26	8	-3.125	0.0026	Antisense
W08E12.7	chrIV	+	3295140	3296517	27	8	-3.22581	0.00195	Antisense	Direct
Y102E9.1	chrIII	+	6730718	6733784	21	8	-2.5	0.019	Antisense
Y24D9A.1	chrIV	+	4408598	4414672	27	8	-3.22581	0.00195	Antisense
Y37D8A.9	chrIII	-	12871017	12874535	31	8	-3.7037	0.000324	Antisense
Y37H2A.1	chrV	+	18108234	18114699	24	8	-2.85714	0.0063	Antisense
Y38F1A.1	chrII	-	12952398	12954695	20	8	-2.38095	0.025	Antisense
Y39G10AR.2	chrI	+	2402232	2409986	19	8	-2.27273	0.0379	Antisense
Y39G10AR.8	chrI	+	2313271	2316010	25	8	-3.0303	0.00429	Antisense
Y46G5A.1	chrII	+	12694319	12725391	30	8	-3.57143	0.000569	Antisense
Y51H4A.12	chrIV	-	16647083	16655979	21	8	-2.5	0.0175	Antisense	Direct
Y66D12A.15	chrIII	+	11526252	11534467	21	8	-2.5	0.019	Antisense	Direct
Y69A2AR.28	chrIV	-	2612447	2613060	18	8	-2.17391	0.0493	Antisense
Y76A2A.2	chrIII	-	13439607	13455187	18	8	-2.17391	0.0493	Antisense
ZC376.5	chrV	-	14183101	14185601	22	8	-2.63158	0.0121	Antisense
B0001.3	chrIV	-	12143417	12145701	17	7	-2.38095	0.0393	Antisense
B0001.7	chrIV	-	12151159	12154212	33	7	-4.54545	4.93e-05	Antisense
B0261.5	chrI	-	5249789	5250440	1	7	7.13	0.0415	Antisense
B0414.6	chrI	-	5792326	5795117	17	7	-2.38095	0.0393	Antisense
B0416.6	chrX	-	9293607	9296555	1	7	7.13	0.0415	Antisense
C04G6.3	chrII	-	5083835	5091674	38	7	-5.26316	4.63e-06	Antisense
C05C10.6	chrII	+	9940682	9943918	18	7	-2.5	0.0295	Antisense
C07G1.3	chrIV	+	8176465	8188861	17	7	-2.38095	0.042	Antisense	Direct
C12C8.3	chrI	-	9335955	9342487	21	7	-2.94118	0.00883	Antisense
C14A4.4	chrII	+	10587963	10592574	19	7	-2.63158	0.0205	Antisense
C24H12.4	chrII	+	411220	416617	20	7	-2.77778	0.0141	Antisense
C34F11.3	chrII	+	5203302	5209777	18	7	-2.5	0.0295	Antisense
C54G10.3	chrV	+	14647176	14653449	21	7	-2.94118	0.00965	Antisense	Direct
D2005.5	chrI	+	7820836	7826373	19	7	-2.63158	0.0205	Antisense
F08F8.8	chrIII	-	7347165	7349091	20	7	-2.77778	0.013	Antisense
F09F7.3	chrIII	+	5557320	5564635	21	7	-2.94118	0.00965	Antisense
F20D12.2	chrIV	+	7948656	7953531	25	7	-3.44828	0.00193	Antisense	Direct
F21H12.5	chrII	-	6088830	6091438	34	7	-4.7619	3.09e-05	Antisense
F22B7.13	chrIII	+	8628842	8630685	25	7	-3.44828	0.00193	Antisense
F35F11.1	chrIV	+	4042567	4047779	18	7	-2.5	0.0295	Antisense	Direct
F36H1.6	chrIV	+	11022572	11025841	24	7	-3.33333	0.00292	Antisense
F55F8.3	chrI	-	5649758	5653642	23	7	-3.22581	0.00396	Antisense
H12I13.4	chrII	-	6078371	6080771	21	7	-2.94118	0.00883	Antisense
K08B4.1	chrIV	+	6095394	6110623	26	7	-3.7037	0.00127	Antisense
R06C1.3	chrI	-	11924774	11929497	19	7	-2.63158	0.019	Antisense
R09B3.5	chrI	-	11912039	11912666	33	7	-4.54545	4.93e-05	Antisense
R11A8.6	chrIV	+	10368578	10372600	19	7	-2.63158	0.0205	Antisense	Direct
T02G5.12	chrII	-	7096298	7098532	27	7	-3.84615	0.000733	Antisense
T05A6.2	chrII	+	7816439	7818193	24	7	-3.33333	0.00292	Antisense	Direct
T05E11.5	chrIV	-	11116709	11118859	20	7	-2.77778	0.013	Antisense
T12A2.2	chrIII	+	6248590	6251188	21	7	-2.94118	0.00965	Antisense
T12C9.7	chrII	-	4458255	4460342	18	7	-2.5	0.0275	Antisense
T13F2.7	chrIV	-	9774576	9777608	1	7	7.13	0.0415	Antisense
W01A11.2	chrV	+	6497092	6498474	18	7	-2.5	0.0295	Antisense	Direct
Y102A5A.1	chrV	+	16802844	16814539	32	7	-4.54545	9.12e-05	Antisense
Y39A1B.3	chrIII	+	10763028	10777225	17	7	-2.38095	0.042	Antisense	Direct
Y39B6A.33	chrV	+	19001919	19006675	18	7	-2.5	0.0295	Antisense	Direct
Y39H10A.7	chrV	-	3756996	3759455	19	7	-2.63158	0.019	Antisense
Y45F10D.3	chrIV	+	13778833	13782329	18	7	-2.5	0.0295	Antisense
Y48B6A.13	chrII	-	14220858	14226162	20	7	-2.77778	0.013	Antisense
Y48E1B.12	chrII	+	13596863	13597782	23	7	-3.22581	0.00438	Antisense
Y51H7C.6	chrII	+	1403349	1409124	20	7	-2.77778	0.0141	Antisense
Y53G8AR.2	chrIII	+	3322958	3331655	20	7	-2.77778	0.0141	Antisense
Y56A3A.20	chrIII	-	11919069	11920101	22	7	-3.125	0.00594	Antisense
Y73B6BL.6	chrIV	+	6324193	6326388	37	7	-5.26316	8.98e-06	Antisense	Direct
Y76A2B.6	chrIII	-	13550578	13555214	19	7	-2.63158	0.019	Antisense
Y76B12C.7	chrIV	-	2009037	2032991	17	7	-2.38095	0.0393	Antisense
ZC518.3	chrIV	+	12361537	12371816	21	7	-2.94118	0.00965	Antisense	Direct
ZK1098.1	chrIII	+	9521975	9525294	20	7	-2.77778	0.0141	Antisense
ZK1307.6	chrII	-	9640916	9644388	19	7	-2.63158	0.019	Antisense
ZK632.6	chrIII	-	9814280	9817035	18	7	-2.5	0.0275	Antisense
ZK792.6	chrIV	-	11688196	11691058	25	7	-3.44828	0.00173	Antisense
ZK858.1	chrI	+	9118106	9121236	22	7	-3.125	0.00653	Antisense
B0035.1	chrIV	+	11310942	11312468	16	6	-2.7027	0.0321	Antisense
B0205.7	chrI	+	10734010	10736598	15	6	-2.5	0.0464	Antisense
B0238.9	chrV	-	5275550	5278085	18	6	-3.0303	0.0137	Antisense
B0286.4	chrII	-	4372940	4376721	17	6	-2.85714	0.0204	Antisense
B0365.1	chrV	+	13116482	13120115	18	6	-3.0303	0.0149	Antisense
C01F1.2	chrII	+	4299650	4300836	19	6	-3.22581	0.00996	Antisense	Direct
C10C6.6	chrIV	-	11473337	11479222	15	6	-2.5	0.0436	Antisense	Direct
C17E4.6	chrI	+	9422547	9431104	17	6	-2.85714	0.0219	Antisense
C17F4.5	chrII	-	3246315	3248114	20	6	-3.33333	0.00606	Antisense
C23G10.7	chrIII	-	6195936	6198360	25	6	-4.16667	0.000684	Antisense
C24D10.1	chrIV	+	5166328	5168417	0	6	5.94	0.0205	Antisense
C26D10.1	chrII	-	8322543	8324984	17	6	-2.85714	0.0204	Antisense
C27B7.1	chrIV	+	8891451	8892727	16	6	-2.7027	0.0321	Antisense
C27B7.5	chrIV	+	8901626	8903154	21	6	-3.57143	0.00437	Antisense
C29A12.1	chrV	-	10812382	10813369	15	6	-2.5	0.0436	Antisense
C29A12.3	chrV	+	10814087	10816690	21	6	-3.57143	0.00437	Antisense
C29E4.4	chrIII	+	7928977	7932922	0	6	-5.88235	0.0240047	Sense	Direct
C32F10.1	chrI	+	5829393	5834643	20	6	-3.33333	0.00662	Antisense
C37H5.5	chrV	+	4827350	4835920	21	6	-3.57143	0.00437	Antisense	Direct
C38C10.4	chrIII	-	9391170	9393065	25	6	-4.16667	0.000684	Antisense	Direct
D1014.8	chrV	-	8126708	8129332	19	6	-3.22581	0.00916	Antisense
D2013.9	chrII	+	9338919	9341142	15	6	-2.5	0.0464	Antisense	Direct
F08G5.1	chrIV	+	12408862	12410437	16	6	-2.7027	0.0321	Antisense
F11A10.2	chrIV	+	12084448	12085270	20	6	-3.33333	0.00662	Antisense
F13B10.2	chrIII	+	3867829	3869524	21	6	-3.57143	0.00437	Antisense	Direct
F13G3.7	chrI	+	7304915	7307011	15	6	-2.5	0.0464	Antisense
F13H8.2	chrII	+	6270323	6273954	16	6	-2.7027	0.0321	Antisense
F18A1.6	chrII	-	7658252	7662449	16	6	-2.7027	0.03	Antisense
F18C5.2	chrII	+	6554925	6559210	20	6	-3.33333	0.00662	Antisense
F23F1.8	chrII	-	42206	44810	15	6	-2.5	0.0436	Antisense	Direct
F23F12.6	chrIII	+	6489738	6491118	19	6	-3.22581	0.00996	Antisense
F25B5.4	chrIII	+	5940192	5943700	30	6	-5	7.76e-05	Antisense
F26B1.2	chrI	+	6317702	6320433	15	6	-2.5	0.0464	Antisense	Direct
F28B3.7	chrI	-	4951570	4957670	26	6	-4.34783	0.000434	Antisense	Direct
F32H2.1	chrI	+	8962313	8966110	18	6	-3.0303	0.0149	Antisense	Direct
F33H1.3	chrII	+	10172846	10174202	15	6	-2.5	0.0464	Antisense
F39B2.4	chrI	-	14777125	14787791	25	6	-4.16667	0.000684	Antisense
F41H10.3	chrIV	+	5369794	5374885	19	6	-3.22581	0.00996	Antisense
F44B9.6	chrIII	-	8016576	8020802	17	6	-2.85714	0.0204	Antisense	Direct
F45F2.11	chrV	-	8519323	8520740	17	6	-2.85714	0.0204	Antisense
F48A11.5	chrII	-	217297	220640	29	6	-5	0.000108	Antisense
F53F10.4	chrI	+	3824948	3826516	16	6	-2.7027	0.0321	Antisense
F53F4.12	chrV	+	13626028	13627392	19	6	-3.22581	0.00996	Antisense	Direct
F54C9.5	chrII	+	8569863	8570890	17	6	-2.85714	0.0219	Antisense
F56D2.1	chrIII	+	5592112	5594086	17	6	-2.85714	0.0219	Antisense
F57C9.1	chrI	+	4848989	4850718	20	6	-3.33333	0.00662	Antisense
F58D5.1	chrI	-	12060827	12064877	18	6	-3.0303	0.0137	Antisense
F59B2.6	chrIII	+	9002699	9004750	21	6	-3.57143	0.00437	Antisense
K04C2.2	chrIII	+	6889710	6895026	17	6	-2.85714	0.0219	Antisense
K08F11.3	chrIV	-	4706996	4710384	19	6	-3.22581	0.00916	Antisense
M03C11.7	chrIII	-	10424108	10427870	23	6	-3.84615	0.00167	Antisense	Direct
M117.4	chrIV	-	11830768	11833515	17	6	-2.85714	0.0204	Antisense
R05F9.10	chrII	-	4902279	4903783	21	6	-3.57143	0.00397	Antisense
R10E12.1	chrIII	+	9957253	9963025	15	6	-2.5	0.0464	Antisense
T05C3.5	chrV	-	5503221	5504829	16	6	-2.7027	0.03	Antisense	Direct
T10B5.3	chrV	-	1864180	1868567	29	6	-5	0.000108	Antisense
T21B10.7	chrII	+	8927664	8929403	15	6	-2.5	0.0464	Antisense
T28A8.6	chrIII	+	13499083	13501389	17	6	-2.85714	0.0219	Antisense
W04B5.4	chrIII	-	2406302	2410963	17	6	-2.85714	0.0204	Antisense
W06D4.6	chrI	+	9065078	9070256	18	6	-3.0303	0.0149	Antisense
Y119D3B.16	chrIII	-	1197435	1201998	15	6	-2.5	0.0436	Antisense
Y39G10AR.21	chrI	+	2308977	2312046	20	6	-3.33333	0.00662	Antisense	Direct
Y40B1B.6	chrI	+	13438055	13449918	21	6	-3.57143	0.00437	Antisense
Y42G9A.4	chrIII	-	6124789	6136221	15	6	-2.5	0.0436	Antisense
Y43F4B.4	chrIII	+	13296732	13298817	16	6	-2.7027	0.0321	Antisense
Y44E3A.4	chrI	-	3320921	3330674	19	6	-3.22581	0.00916	Antisense
Y48G1A.5	chrI	-	318543	323353	17	6	-2.85714	0.0204	Antisense	Direct
Y51A2D.7	chrV	+	18533918	18549008	21	6	-3.57143	0.00437	Antisense	Direct
Y54F10AM.11	chrIII	-	2562970	2563978	16	6	-2.7027	0.03	Antisense
Y54F10BM.1	chrIII	+	2331568	2341994	15	6	-2.5	0.0464	Antisense
Y54G11A.3	chrII	+	14276552	14283861	15	6	-2.5	0.0464	Antisense
Y55F3AL.1	chrIV	+	959451	984392	16	6	-2.7027	0.0321	Antisense
Y55F3AM.12	chrIV	-	1052968	1054786	15	6	-2.5	0.0436	Antisense	Direct
Y55F3AM.3	chrIV	+	1012651	1019687	18	6	-3.0303	0.0149	Antisense
Y59A8B.23	chrV	-	17954087	17966814	15	6	-2.5	0.0436	Antisense
Y75B8A.30	chrIII	-	12345200	12351218	15	6	-2.5	0.0436	Antisense	Direct
Y80D3A.2	chrV	-	18860713	18894932	16	6	-2.7027	0.03	Antisense
ZC412.5	chrV	-	14874175	14875406	18	6	-3.0303	0.0137	Antisense
ZK1010.2	chrIII	-	12974950	12977742	17	6	-2.85714	0.0204	Antisense
ZK177.6	chrII	+	5501605	5503879	27	6	-4.54545	0.000312	Antisense
B0041.7	chrI	-	4665744	4671739	0	5	-5	0.0460563	Sense
B0303.9	chrIII	+	8700835	8703213	16	5	-3.33333	0.0153	Antisense	Direct
B0348.6	chrV	-	6588	7822	0	5	-5	0.0460563	Sense
C06G4.2	chrIII	+	7981097	7986256	20	5	-4.16667	0.0027	Antisense
C09H10.10	chrII	-	11095855	11096399	15	5	-3.125	0.0216	Antisense
C10H11.9	chrI	-	4738170	4744322	0	5	-5	0.0460563	Sense
C14C10.4	chrV	-	12592738	12596274	15	5	-3.125	0.0216	Antisense
C16A3.1	chrIII	+	6390887	6393617	24	5	-5	0.000426	Antisense
C25H3.8	chrII	-	5669747	5678212	25	5	-5.26316	0.000234	Antisense
C32D5.11	chrII	-	6352492	6355862	27	5	-5.55556	8.82e-05	Antisense
C38C3.5	chrV	+	1475072	1479582	17	5	-3.57143	0.01	Antisense	Direct
C42C1.5	chrIV	-	12276055	12278022	13	5	-2.7027	0.048	Antisense
C43E11.1	chrI	+	4270697	4273330	17	5	-3.57143	0.01	Antisense
C44B9.4	chrIII	+	10882251	10893546	14	5	-2.94118	0.0344	Antisense	Direct
D2096.12	chrIV	+	8363444	8366359	36	5	-7.69231	1.1e-06	Antisense
F08B4.1	chrIV	+	8692080	8696425	16	5	-3.33333	0.0153	Antisense
F08H9.1	chrV	+	14457452	14459875	24	5	-5	0.000426	Antisense
F10G7.2	chrII	+	4706831	4709762	0	5	-5	0.0446938	Sense
F13A7.14	chrV	+	16402199	16405584	15	5	-3.125	0.023	Antisense	Direct
F14B4.3	chrI	-	9280969	9286553	0	5	-5	0.0460563	Sense
F18C12.2	chrI	+	8083576	8095588	18	5	-3.84615	0.00652	Antisense
F25B4.6	chrV	-	5682703	5684573	14	5	-2.94118	0.0324	Antisense
F25H2.12	chrI	+	10570067	10571893	0	5	-5	0.0446938	Sense
F26F4.11	chrIII	-	4917193	4917973	13	5	-2.7027	0.048	Antisense
F26F4.7	chrIII	-	4894609	4899048	15	5	-3.125	0.0216	Antisense
F29D10.4	chrI	-	8845798	8851087	14	5	-2.94118	0.0324	Antisense
F33D4.5	chrIV	-	7707667	7709067	23	5	-4.7619	0.000609	Antisense
F39B2.10	chrI	+	14757065	14758419	20	5	-4.16667	0.0027	Antisense
F39B2.11	chrI	-	14755138	14756413	20	5	-4.16667	0.00245	Antisense
F39B2.6	chrI	+	14759906	14760621	0	5	-5	0.0446938	Sense
F40F9.6	chrV	-	9725917	9729481	0	5	-5	0.0460563	Sense
F43G9.3	chrI	-	8612721	8615124	13	5	-2.7027	0.048	Antisense
F44E2.2	chrIII	+	8853709	8861292	17	5	-3.57143	0.01	Antisense	Direct
F48E8.7	chrIII	-	5446466	5448376	15	5	-3.125	0.0216	Antisense
F53F10.5	chrI	+	3818080	3821326	0	5	-5	0.0446938	Sense	Direct
F54C8.2	chrIII	+	9433974	9434997	19	5	-4	0.00421	Antisense	Direct
F59A2.6	chrIII	+	3415537	3424729	0	5	-5	0.0446938	Sense
H20J04.2	chrII	+	4340145	4350979	15	5	-3.125	0.023	Antisense
H37N21.1	chrI	-	7140276	7147229	0	5	4.76	0.0459	Antisense	Inverse
K02F3.11	chrIII	-	852927	853896	15	5	-3.125	0.0216	Antisense
K03A1.5	chrX	-	7301305	7305519	0	5	-5	0.0460563	Sense
M01E11.3	chrI	+	5573245	5576745	22	5	-4.54545	0.00108	Antisense	Direct
M01E5.4	chrI	-	13287508	13289528	23	5	-4.7619	0.000609	Antisense
M03D4.1	chrIV	+	6118207	6121754	0	5	-5	0.0446938	Sense
R06F6.5	chrII	-	10796580	10798401	29	5	-6.25	3.27e-05	Antisense
R07H5.2	chrIV	+	11179614	11182972	18	5	-3.84615	0.00652	Antisense	Direct
T02C12.3	chrIII	+	4022138	4025595	17	5	-3.57143	0.01	Antisense	Direct
T02H6.1	chrII	+	709386	723705	15	5	-3.125	0.023	Antisense
T07A9.11	chrIV	+	385908	386549	14	5	-2.94118	0.0344	Antisense
T07E3.2	chrIII	+	6907538	6907904	0	5	4.76	0.0446	Antisense
T09A12.4	chrIV	-	8226314	8231817	23	5	-4.7619	0.000609	Antisense
T16H12.2	chrIII	+	10086195	10086953	0	5	4.76	0.0446	Antisense
T18H9.7	chrV	-	9213729	9217216	0	5	-5	0.0460563	Sense
T21C12.1	chrIII	+	10520685	10532582	0	5	4.76	0.0446	Antisense	Inverse
T22B3.2	chrIV	+	11704334	11708207	0	5	4.76	0.0446	Antisense
T22C1.3	chrI	+	7938553	7940108	15	5	-3.125	0.023	Antisense
T23B12.4	chrV	+	8462304	8465549	16	5	-3.33333	0.0153	Antisense
T26A5.3	chrIII	+	6465108	6467150	0	5	4.76	0.0446	Antisense	Inverse
W03F11.6	chrI	+	2160043	2209630	16	5	-3.33333	0.0153	Antisense
W09G10.4	chrII	-	3532595	3546425	20	5	-4.16667	0.00245	Antisense	Direct
Y113G7B.23	chrV	-	20234631	20244872	16	5	-3.33333	0.0142	Antisense
Y116A8C.35	chrIV	-	17116718	17118716	14	5	-2.94118	0.0324	Antisense	Direct
Y119C1A.1	chrI	-	4641407	4644056	21	5	-4.34783	0.00155	Antisense
Y119D3B.11	chrIII	+	1208119	1213639	17	5	-3.57143	0.01	Antisense
Y32H12A.5	chrIII	-	5376171	5379877	13	5	-2.7027	0.048	Antisense
Y37D8A.21	chrIII	-	12927936	12931741	23	5	-4.7619	0.000609	Antisense
Y37E11B.5	chrIV	-	3593964	3598547	16	5	-3.33333	0.0142	Antisense
Y39A1A.12	chrIII	+	10643015	10645841	18	5	-3.84615	0.00652	Antisense
Y41C4A.9	chrIII	-	11710857	11718518	14	5	-2.94118	0.0324	Antisense
Y43F8B.9	chrV	+	19479166	19480371	15	5	3.09	0.0238747	Sense	Inverse
Y48G9A.3	chrIII	+	2151955	2162086	15	5	-3.125	0.023	Antisense
Y71G12B.13	chrI	+	1702123	1707891	15	5	-3.125	0.023	Antisense	Direct
Y87G2A.5	chrI	-	13548061	13559349	21	5	-4.34783	0.00155	Antisense
ZC168.6	chrIV	-	10738230	10738630	17	5	-3.57143	0.00928	Antisense
ZC376.6	chrV	+	14185762	14192106	17	5	-3.57143	0.01	Antisense
ZK550.3	chrIV	+	17250085	17254919	17	5	-3.57143	0.01	Antisense
B0205.9	chrI	+	10720814	10723471	13	4	-3.7037	0.0236	Antisense
B0238.11	chrV	+	5269468	5270717	16	4	-4.54545	0.00614	Antisense
B0304.2	chrII	+	4523631	4524514	12	4	-3.33333	0.0361	Antisense
B0334.8	chrII	-	11519414	11526978	12	4	-3.33333	0.0342	Antisense
C01B10.8	chrIV	+	6635075	6638003	13	4	-3.7037	0.0236	Antisense
C01G5.6	chrIV	+	6522857	6524443	18	4	-5	0.00241	Antisense
C06A5.3	chrI	+	5986493	5990583	17	4	-4.7619	0.00386	Antisense
C07D8.6	chrX	+	7341456	7342728	12	4	-3.33333	0.0361	Antisense
C07H6.2	chrIII	+	7520927	7521362	16	4	-4.54545	0.00614	Antisense
C14A4.1	chrII	+	10579899	10580890	16	4	-4.54545	0.00614	Antisense
C14A4.2	chrII	+	10581054	10582441	16	4	-4.54545	0.00614	Antisense
C14A4.3	chrII	+	10584265	10587850	13	4	-3.7037	0.0236	Antisense
C14A4.5	chrII	+	10592678	10593452	13	4	-3.7037	0.0236	Antisense
C15C6.3	chrI	+	12207088	12212196	12	4	-3.33333	0.0361	Antisense	Direct
C18E9.6	chrII	-	8971905	8973485	14	4	-4	0.0142	Antisense
C27H6.4	chrV	-	9983894	9985711	12	4	-3.33333	0.0342	Antisense
C29E4.8	chrIII	-	7950185	7951528	15	4	-4.16667	0.00903	Antisense
C32E8.2	chrI	+	3788035	3788911	14	4	-4	0.0152	Antisense	Direct
C35D10.9	chrIII	+	4852287	4855129	19	4	-5.26316	0.00149	Antisense
C44E4.1	chrI	-	4610268	4622973	16	4	-4.54545	0.00568	Antisense
C53H9.2	chrI	+	1832897	1834747	14	4	-4	0.0152	Antisense
C55B7.1	chrI	+	6514021	6517308	17	4	-4.7619	0.00386	Antisense
D1054.2	chrV	+	10770355	10771193	16	4	-4.54545	0.00614	Antisense	Direct
D2085.4	chrII	+	8664803	8669074	14	4	-4	0.0152	Antisense
F01F1.8	chrIII	-	5853482	5855639	16	4	-4.54545	0.00568	Antisense	Direct
F22D6.3	chrI	-	7088020	7090063	13	4	-3.7037	0.0222	Antisense
F31E3.3	chrIII	+	6972145	6973636	14	4	-4	0.0152	Antisense
F32D1.9	chrV	+	4371888	4373638	12	4	-3.33333	0.0361	Antisense	Direct
F38A5.13	chrIV	+	6585854	6588168	17	4	-4.7619	0.00386	Antisense
F40F9.1	chrV	+	9705328	9707818	18	4	-5	0.00241	Antisense
F40F9.6	chrV	-	9725917	9729481	14	4	-4	0.0142	Antisense
F41G3.14	chrII	+	6741675	6742702	12	4	-3.33333	0.0361	Antisense
F47G9.1	chrV	-	11324258	11326923	13	4	-3.7037	0.0222	Antisense
F52E1.1	chrV	+	8414063	8415234	17	4	-4.7619	0.00386	Antisense
F53F10.2	chrI	+	3830940	3834121	12	4	-3.33333	0.0361	Antisense
F53G12.5	chrI	+	128692	133809	13	4	-3.7037	0.0236	Antisense	Direct
F54C8.7	chrIII	-	9451497	9452953	15	4	-4.16667	0.00903	Antisense
F55C5.8	chrV	-	12288898	12291635	14	4	-4	0.0142	Antisense
F56C9.3	chrIII	+	7311223	7313036	13	4	-3.7037	0.0236	Antisense
K01C8.10	chrII	+	8283599	8285413	17	4	-4.7619	0.00386	Antisense
K01C8.3	chrII	+	8270538	8273515	17	4	-4.7619	0.00386	Antisense	Direct
K02F2.1	chrI	+	6838352	6843342	16	4	-4.54545	0.00614	Antisense
K02F3.12	chrIII	+	856626	860036	13	4	-3.7037	0.0236	Antisense
K03D10.3	chrI	+	14118744	14127160	16	4	-4.54545	0.00614	Antisense
K04G2.6	chrI	+	8040793	8043114	17	4	-4.7619	0.00386	Antisense
K08F11.1	chrIV	+	4724852	4725304	16	4	-4.54545	0.00614	Antisense	Direct
K08H10.7	chrV	-	9987887	9991614	12	4	-3.33333	0.0342	Antisense
M04F3.1	chrI	+	4770304	4771267	13	4	-3.7037	0.0236	Antisense
R05F9.6	chrII	+	4889423	4891416	13	4	-3.7037	0.0236	Antisense
R08D7.1	chrIII	-	8965953	8967637	12	4	-3.33333	0.0342	Antisense
R12E2.1	chrI	+	4182221	4184994	17	4	-4.7619	0.00386	Antisense	Direct
R151.2	chrIII	+	7212459	7214643	12	4	-3.33333	0.0361	Antisense
R74.5	chrIII	+	4197257	4201798	12	4	-3.33333	0.0361	Antisense
T05A12.3	chrIV	-	6883559	6887635	14	4	-4	0.0142	Antisense
T10E9.2	chrI	+	6542100	6544954	15	4	-4.16667	0.0097	Antisense
T20D3.7	chrIV	-	9339399	9341767	12	4	-3.33333	0.0342	Antisense
T20G5.11	chrIII	-	10217239	10218538	12	4	-3.33333	0.0342	Antisense
T22D1.10	chrIV	-	6917123	6919390	16	4	-4.54545	0.00568	Antisense
T22D1.4	chrIV	+	6910666	6912849	24	4	-6.66667	0.000126	Antisense
T23B12.2	chrV	+	8467242	8468921	23	4	-6.25	0.000208	Antisense
T24B8.1	chrII	-	9056453	9057000	12	4	-3.33333	0.0342	Antisense	Direct
T24D1.2	chrI	-	9953551	9955823	16	4	-4.54545	0.00568	Antisense
T27F6.6	chrI	+	12490964	12494515	14	4	-4	0.0152	Antisense
T27F7.3	chrII	-	4990816	4993566	16	4	-4.54545	0.00568	Antisense
W02B12.10	chrII	-	11472114	11473478	12	4	-3.33333	0.0342	Antisense
Y102A5C.18	chrV	-	16958547	16965650	16	4	-4.54545	0.00568	Antisense
Y105E8A.17	chrI	+	14469492	14476708	13	4	-3.7037	0.0236	Antisense
Y37E11AL.8	chrIV	-	3687805	3694711	16	4	-4.54545	0.00568	Antisense
Y39B6A.2	chrV	+	19190510	19198887	12	4	-3.33333	0.0361	Antisense	Direct
Y47H9C.4	chrI	-	11851555	11868095	12	4	-3.33333	0.0342	Antisense
Y49E10.17	chrIII	+	12436431	12440936	15	4	-4.16667	0.0097	Antisense	Direct
Y54E10BL.6	chrI	-	3005427	3013449	16	4	-4.54545	0.00568	Antisense
Y59A8B.13	chrV	+	18087097	18094390	15	4	-4.16667	0.0097	Antisense	Direct
Y66D12A.9	chrIII	+	11568017	11573159	14	4	-4	0.0152	Antisense	Direct
Y67H2A.10	chrIV	-	13282969	13289467	20	4	-5.55556	0.00083	Antisense
Y71H2B.10	chrIII	-	2583972	2597023	14	4	-4	0.0142	Antisense
ZK1128.5	chrIII	+	10120673	10122816	20	4	-5.55556	0.000919	Antisense
ZK652.3	chrIII	+	7858904	7859441	12	4	-3.33333	0.0361	Antisense
ZK686.2	chrIII	-	7763628	7765980	15	4	-4.16667	0.00903	Antisense
ZK863.3	chrV	-	12179488	12181387	14	4	-4	0.0142	Antisense	Direct
C16C10.3	chrIII	-	4172306	4176132	12	3	3.96	0.0240777	Sense	Inverse
Y48B6A.2	chrII	+	14155196	14155472	12	3	3.96	0.0254459	Sense
B0205.11	chrI	-	10732576	10733674	14	2	-5.88235	0.00498	Antisense
B0244.8	chrIII	+	5728129	5730000	12	2	-5	0.0142	Antisense	Direct
B0464.1	chrIII	-	9489221	9491110	10	2	-4.16667	0.0348	Antisense
B0491.7	chrII	+	11350108	11351141	11	2	-4.54545	0.0229	Antisense
B0511.10	chrI	-	10640516	10642270	21	2	-9.09091	0.000129	Antisense
C01F6.1	chrIV	+	9096821	9101565	12	2	-5	0.0142	Antisense
C07G2.1	chrIII	+	4489324	4491364	10	2	4.76	0.0330629	Sense	Inverse
C08H9.3	chrII	-	9882662	9886364	12	2	-5	0.0134	Antisense	Direct
C15H11.13	chrV	+	14395047	14395727	12	2	-5	0.0142	Antisense
C16A3.4	chrIII	+	6381587	6382843	12	2	-5	0.0142	Antisense
C17G10.9	chrII	-	5619561	5622457	13	2	-5.55556	0.00821	Antisense
C26E6.6	chrIII	+	4935540	4937168	14	2	-5.88235	0.00536	Antisense
C37A2.2	chrI	+	6791025	6797471	15	2	-6.25	0.00325	Antisense	Direct
C41C4.6	chrII	+	8129889	8134653	14	2	-5.88235	0.00536	Antisense
C46F11.2	chrIII	+	3650884	3652810	11	2	-4.54545	0.0229	Antisense
C48D1.2	chrIV	-	13198252	13206264	12	2	-5	0.0134	Antisense
C53A5.2	chrV	-	14519530	14523155	10	2	-4.16667	0.0348	Antisense
C53A5.3	chrV	+	14525385	14526955	12	2	-5	0.0142	Antisense
D1046.1	chrIV	+	8926321	8929011	11	2	-4.54545	0.0229	Antisense	Direct
F10G7.8	chrII	-	4696585	4698280	12	2	-5	0.0134	Antisense	Direct
F13C5.2	chrX	+	593960	596290	10	2	-4.16667	0.0365	Antisense	Direct
F13H10.3	chrIV	-	11012084	11015853	11	2	-4.54545	0.0217	Antisense
F16D3.2	chrI	-	8358716	8363834	11	2	-4.54545	0.0217	Antisense
F16D3.4	chrI	-	8363954	8369910	17	2	-7.14286	0.00107	Antisense
F29C4.6	chrIV	-	119404	121697	13	2	-5.55556	0.00821	Antisense
F32A11.2	chrII	-	13153368	13156955	11	2	-4.54545	0.0217	Antisense
F33G12.5	chrII	-	5036848	5040019	11	2	-4.54545	0.0217	Antisense
F36A2.1	chrI	-	8804794	8808041	12	2	-5	0.0134	Antisense	Direct
F41H10.6	chrIV	-	5356554	5361000	12	2	-5	0.0134	Antisense
F42A10.1	chrIII	+	6173570	6175997	10	2	-4.16667	0.0365	Antisense
F44B9.8	chrIII	-	8028061	8029578	13	2	-5.55556	0.00821	Antisense
F46B6.6	chrV	-	9783149	9786840	10	2	-4.16667	0.0348	Antisense	Direct
F49C12.8	chrIV	+	9316615	9318083	12	2	-5	0.0142	Antisense
F52H3.2	chrII	-	10030945	10033130	11	2	-4.54545	0.0217	Antisense
F55F8.2	chrI	-	5646394	5649659	10	2	-4.16667	0.0348	Antisense	Direct
F56C9.6	chrIII	-	7308924	7310697	13	2	-5.55556	0.00821	Antisense	Direct
H21P03.1	chrIV	-	11479331	11480156	21	2	-9.09091	0.000129	Antisense
K07A1.12	chrI	-	9618393	9619748	14	2	-5.88235	0.00498	Antisense	Direct
K07C5.3	chrV	+	10343003	10345457	17	2	-7.14286	0.00117	Antisense
K08F11.4	chrIV	-	4710853	4712492	10	2	-4.16667	0.0348	Antisense
K11D2.3	chrI	+	12508437	12513394	17	2	-7.14286	0.00117	Antisense
K12H4.3	chrIII	+	8045960	8047538	13	2	-5.55556	0.00877	Antisense
R06C7.7	chrI	-	7248827	7251253	11	2	-4.54545	0.0217	Antisense
R06F6.2	chrII	-	10787853	10793415	15	2	-6.25	0.003	Antisense
R08C7.8	chrIV	-	4433078	4434534	10	2	-4.16667	0.0348	Antisense
T01D1.2	chrII	+	162373	170628	11	2	-4.54545	0.0229	Antisense
T03F1.3	chrI	+	3867542	3869115	13	2	-5.55556	0.00877	Antisense
T07G12.11	chrIV	+	10558692	10560899	12	2	-5	0.0142	Antisense
T19C3.8	chrIII	-	632023	634623	10	2	-4.16667	0.0348	Antisense
T20B12.3	chrIII	+	7382039	7383831	13	2	-5.55556	0.00877	Antisense	Direct
T28F3.1	chrIV	-	17281410	17284154	10	2	-4.16667	0.0348	Antisense
W02G9.5	chrV	+	2658031	2660776	14	2	-5.88235	0.00536	Antisense	Direct
W03F9.5	chrV	+	156830	163350	10	2	-4.16667	0.0365	Antisense	Direct
W08G11.4	chrV	+	16357493	16367512	19	2	-7.69231	0.000415	Antisense
Y102A5D.1	chrV	-	17142173	17143854	12	2	-5	0.0134	Antisense
Y105E8A.23	chrI	-	14552081	14565831	10	2	-4.16667	0.0348	Antisense
Y37A1B.2	chrIV	-	14060999	14068512	14	2	-5.88235	0.00498	Antisense
Y39B6A.37	chrV	+	18990821	18993763	13	2	-5.55556	0.00877	Antisense
Y45F10D.7	chrIV	+	13788902	13796191	15	2	-6.25	0.00325	Antisense
Y48G1C.8	chrI	-	101414	107759	10	2	-4.16667	0.0348	Antisense
Y54H5A.3	chrIII	-	5151999	5153113	11	2	-4.54545	0.0217	Antisense
Y56A3A.21	chrIII	+	11920621	11921287	18	2	-7.69231	0.0007	Antisense
Y63D3A.2	chrI	-	14090724	14096333	10	2	-4.16667	0.0348	Antisense
Y66D12A.5	chrIII	+	11581532	11588819	14	2	-5.88235	0.00536	Antisense
Y71G12B.3	chrI	+	1812955	1813538	10	2	-4.16667	0.0365	Antisense
Y87G2A.7	chrI	+	13572366	13575610	10	2	-4.16667	0.0365	Antisense
ZC155.1	chrIII	+	5225582	5226604	10	2	-4.16667	0.0365	Antisense
ZK1127.9	chrII	-	7045979	7050012	16	2	-6.66667	0.0018	Antisense
ZK524.4	chrI	-	7461360	7466417	13	2	-5.55556	0.00821	Antisense
B0285.5	chrIII	+	4345309	4350050	9	1	-7.69231	0.0202	Antisense
B0393.4	chrIII	-	4759727	4763573	9	1	-7.69231	0.0192	Antisense
BE0003N10.2	chrIII	-	1031336	1037200	11	1	-9.09091	0.00654	Antisense
C01G8.5	chrI	-	5284062	5291608	13	1	-11.1111	0.00217	Antisense
C02B10.2	chrIV	-	5090279	5091023	9	1	-7.69231	0.0192	Antisense
C05C8.2	chrV	+	7231171	7232731	12	1	-10	0.00404	Antisense	Direct
C08C3.2	chrIII	-	7774706	7775955	8	1	-6.66667	0.0326	Antisense
C09D4.4	chrI	-	5479552	5484646	12	1	-10	0.00378	Antisense
C09D4.5	chrI	-	5484832	5485715	18	1	-14.2857	0.000129	Antisense	Direct
C13B4.2	chrII	-	14485739	14488585	13	1	-11.1111	0.00217	Antisense
C14B1.4	chrIII	+	3705243	3706764	10	1	-8.33333	0.0119	Antisense
C14B1.6	chrIII	+	3713441	3718750	10	1	-8.33333	0.0119	Antisense
C15H11.9	chrV	-	14423873	14424982	9	1	-7.69231	0.0192	Antisense
C24F3.4	chrIV	-	10214956	10219279	9	1	-7.69231	0.0192	Antisense
C28C12.9	chrIV	-	8496621	8498853	19	1	-16.6667	7.28e-05	Antisense
C33A12.3	chrIV	-	9511103	9512970	8	1	-6.66667	0.0326	Antisense
C37F5.1	chrIV	-	2275862	2300350	8	1	-6.66667	0.0326	Antisense
C41C4.7	chrII	-	8134689	8136848	9	1	-7.69231	0.0192	Antisense
C41D11.2	chrI	+	4444719	4446586	9	1	-7.69231	0.0202	Antisense	Direct
C45B11.1	chrV	-	11036507	11039400	8	1	-6.66667	0.0326	Antisense
C46A5.5	chrIV	-	7757984	7759610	8	1	-6.66667	0.0326	Antisense
C55B7.4	chrI	+	6497439	6499561	7	1	7.13	0.0415469	Sense
E01A2.2	chrI	+	4132500	4135240	18	1	-14.2857	0.000143	Antisense
E03A3.2	chrIII	-	4052785	4057948	12	1	-10	0.00378	Antisense
F02A9.6	chrIII	+	9092151	9099594	11	1	-9.09091	0.00694	Antisense
F08F8.9	chrIII	-	7349218	7353897	16	1	-14.2857	0.000403	Antisense
F14E5.2	chrII	-	8423881	8428786	8	1	-6.66667	0.0326	Antisense	Direct
F22F7.1	chrV	+	2127532	2130047	10	1	-8.33333	0.0119	Antisense
F26F4.5	chrIII	-	4888159	4890913	11	1	-9.09091	0.00654	Antisense
F28F8.5	chrV	-	15574124	15575377	10	1	-8.33333	0.0112	Antisense
F33D11.11	chrI	-	5868281	5869957	9	1	-7.69231	0.0192	Antisense
F33E2.2	chrI	-	12565792	12572790	13	1	-11.1111	0.00217	Antisense
F35G12.5	chrIII	+	4584898	4586441	8	1	-6.66667	0.034	Antisense
F42C5.8	chrIV	-	7313027	7313843	12	1	-10	0.00378	Antisense	Direct
F44G4.4	chrII	+	8997745	8999640	11	1	-9.09091	0.00694	Antisense	Direct
F46F11.6	chrI	-	5616598	5618554	15	1	-12.5	0.000709	Antisense
F53A3.2	chrIII	-	1945108	1950246	8	1	-6.66667	0.0326	Antisense
F54E4.1	chrX	+	14610797	14624771	9	1	-7.69231	0.0202	Antisense
F56A8.3	chrIII	+	13256758	13262770	14	1	-12.5	0.00134	Antisense
F57B10.7	chrI	+	6554729	6558595	15	1	-12.5	0.000771	Antisense
K01D12.6	chrV	-	12398735	12400834	12	1	-10	0.00378	Antisense
K08D10.12	chrIV	+	4178455	4179518	9	1	-7.69231	0.0202	Antisense	Direct
M03C11.5	chrIII	+	10416038	10421245	8	1	-6.66667	0.034	Antisense
R07H5.1	chrIV	+	11183109	11184066	8	1	-6.66667	0.034	Antisense
R12E2.11	chrI	-	4172464	4173625	10	1	-8.33333	0.0112	Antisense
R12E2.2	chrI	+	4178812	4182159	8	1	-6.66667	0.034	Antisense	Direct
R151.10	chrIII	-	7230112	7230860	10	1	-8.33333	0.0112	Antisense
R31.1	chrV	+	11899540	11916600	9	1	-7.69231	0.0202	Antisense	Direct
T01E8.6	chrII	-	10240334	10242411	10	1	-8.33333	0.0112	Antisense
T04A8.7	chrIII	+	4695324	4697972	8	1	-6.66667	0.034	Antisense
T05E8.3	chrI	-	5472323	5479441	15	1	-12.5	0.000709	Antisense
T13F2.6	chrIV	+	9778261	9781177	10	1	-8.33333	0.0119	Antisense	Direct
T21B10.5	chrII	-	8938969	8940408	8	1	-6.66667	0.0326	Antisense
T23G5.2	chrIII	-	9231330	9236230	15	1	-12.5	0.000709	Antisense
T27A3.7	chrI	-	6107834	6109657	9	1	-7.69231	0.0192	Antisense
T27F6.7	chrI	+	12494814	12497340	8	1	-6.66667	0.034	Antisense
T27F6.8	chrI	-	12497441	12499806	13	1	-11.1111	0.00217	Antisense
T28F12.3	chrV	-	4517667	4549277	14	1	-12.5	0.00124	Antisense
W01B6.9	chrIV	+	10086118	10088282	10	1	-8.33333	0.0119	Antisense
W05F2.3	chrI	-	3367650	3368553	8	1	-6.66667	0.0326	Antisense
W05F2.5	chrI	+	3371769	3373833	8	1	-6.66667	0.034	Antisense	Direct
W06F12.1	chrIII	+	13713924	13723453	20	1	-16.6667	4.59e-05	Antisense
W09C5.1	chrI	-	13626651	13628396	10	1	-8.33333	0.0112	Antisense
W10C8.2	chrI	-	2823468	2830294	11	1	-9.09091	0.00654	Antisense
Y102A5C.36	chrV	-	16926955	16927820	13	1	-11.1111	0.00217	Antisense	Direct
Y18D10A.16	chrI	-	12903050	12904027	13	1	-11.1111	0.00217	Antisense	Direct
Y41D4B.13	chrIV	+	1597313	1601619	11	1	-9.09091	0.00694	Antisense
Y43F4B.7	chrIII	+	13307381	13313271	8	1	-6.66667	0.034	Antisense
Y43F8A.2	chrV	+	19371531	19376179	10	1	-8.33333	0.0119	Antisense
Y48A6B.5	chrIII	+	11008924	11010477	8	1	-6.66667	0.034	Antisense
Y48C3A.17	chrII	+	13406067	13411188	11	1	-9.09091	0.00694	Antisense
Y48C3A.9	chrII	-	13325797	13330690	9	1	-7.69231	0.0192	Antisense
Y48E1C.1	chrII	+	13414936	13424352	8	1	-6.66667	0.034	Antisense
Y51F10.2	chrI	+	1978005	1983438	7	1	7.13	0.0415469	Sense
Y54G2A.22	chrIV	-	2919859	2922226	11	1	-9.09091	0.00654	Antisense
Y59A8B.12	chrV	-	18085594	18086183	10	1	-8.33333	0.0112	Antisense
Y66D12A.8	chrIII	+	11574102	11578601	8	1	-6.66667	0.034	Antisense
Y66H1A.4	chrIV	+	426169	426952	8	1	-6.66667	0.034	Antisense
Y71G12B.12	chrI	+	1709587	1715569	12	1	-10	0.00404	Antisense
Y71H2B.2	chrIII	+	2623158	2627725	15	1	-12.5	0.000771	Antisense
Y71H2B.5	chrIII	+	2608007	2618845	13	1	-11.1111	0.00233	Antisense
Y73F8A.24	chrIV	-	15445340	15453148	13	1	-11.1111	0.00217	Antisense
Y87G2A.6	chrI	-	13566433	13572024	14	1	-12.5	0.00124	Antisense
Y95D11A.1	chrI	+	10944202	10945683	8	1	-6.66667	0.034	Antisense	Direct
ZK1098.9	chrIII	+	9544351	9545769	9	1	-7.69231	0.0202	Antisense
ZK484.4	chrI	-	6070680	6078849	8	1	-6.66667	0.0326	Antisense
3R5.1	chrIII	+	13780107	13781013	6	0	5.94	0.0212554	Sense
B0250.5	chrV	+	20489311	20492731	7	0	-7.14286	0.0134	Antisense
B0280.3	chrIII	+	7123113	7124087	5	0	-5	0.0461	Antisense
B0336.6	chrIII	-	5690179	5692657	7	0	-7.14286	0.0129	Antisense
B0513.2	chrIV	+	13882701	13884012	6	0	-5.88235	0.0249	Antisense
C01F6.8	chrIV	-	9094545	9095633	6	0	-5.88235	0.024	Antisense
C03A7.2	chrV	+	5181895	5183701	5	0	-5	0.0461	Antisense	Direct
C05C10.2	chrII	+	9922169	9930752	5	0	4.76	0.0459172	Sense
C05D11.10	chrIII	-	6430978	6431734	5	0	-5	0.0447	Antisense
C06A5.7	chrI	-	5992671	6001101	5	0	4.76	0.0446469	Sense
C06A8.4	chrII	+	7783780	7784574	8	0	-7.69231	0.00727	Antisense
C08B11.4	chrII	-	8028884	8032639	5	0	4.76	0.0446469	Sense
C17G10.1	chrII	+	5596542	5598291	7	0	-7.14286	0.0134	Antisense
C25A1.1	chrI	+	10162377	10163518	6	0	-5.88235	0.0249	Antisense
C25D7.6	chrV	-	15056750	15059575	5	0	4.76	0.0446469	Sense
C27H6.3	chrV	+	9981256	9982736	10	0	-10	0.00212	Antisense	Direct
C30F12.4	chrI	-	6972154	6973788	5	0	-5	0.0447	Antisense
C34B4.2	chrV	+	13086174	13090422	7	0	-7.14286	0.0134	Antisense
C34C6.2	chrII	-	8679594	8683798	6	0	-5.88235	0.024	Antisense
C34C6.4	chrII	-	8696527	8698860	5	0	-5	0.0447	Antisense
C35D10.1	chrIII	+	4879707	4881460	6	0	-5.88235	0.0249	Antisense
C36E8.1	chrIII	-	3999635	4003871	8	0	-7.69231	0.00692	Antisense
C55B7.5	chrI	+	6494291	6496111	6	0	-5.88235	0.0249	Antisense	Direct
C56A3.4	chrV	-	13550499	13551756	7	0	-7.14286	0.0129	Antisense
C56A3.6	chrV	-	13553460	13556366	8	0	-7.69231	0.00692	Antisense
D2096.2	chrIV	+	8379971	8381799	6	0	-5.88235	0.0249	Antisense
E02D9.1	chrI	+	6800386	6804845	5	0	-5	0.0461	Antisense
E02H1.1	chrII	-	9589884	9591068	5	0	-5	0.0447	Antisense
E02H1.5	chrII	+	9595147	9596448	8	0	-7.69231	0.00727	Antisense
F08F8.4	chrIII	-	7357587	7358996	5	0	-5	0.0447	Antisense
F11H8.1	chrIII	+	7021823	7023500	5	0	-5	0.0461	Antisense
F13G3.11	chrI	+	7307114	7308625	5	0	-5	0.0461	Antisense
F14D2.8	chrII	-	3347568	3349865	6	0	-5.88235	0.024	Antisense
F14D2.9	chrII	-	3352770	3356298	5	0	-5	0.0447	Antisense	Direct
F17C11.1	chrV	+	10941425	10942752	5	0	-5	0.0461	Antisense
F22B7.6	chrIII	-	8626214	8628477	5	0	-5	0.0447	Antisense
F26E4.10	chrI	-	9781315	9785712	6	0	-5.88235	0.024	Antisense
F29B9.6	chrIV	+	4651049	4651910	6	0	-5.88235	0.0249	Antisense
F29F11.3	chrV	+	10658167	10659632	6	0	-5.88235	0.0249	Antisense
F32B6.4	chrIV	-	9890622	9891999	5	0	-5	0.0447	Antisense
F32D8.14	chrV	-	10893624	10894743	9	0	-9.09091	0.00372	Antisense
F33D11.10	chrI	-	5866765	5868132	7	0	-7.14286	0.0129	Antisense
F33D11.12	chrI	-	5862666	5866434	5	0	-5	0.0447	Antisense
F36F12.8	chrV	+	2090680	2091615	5	0	-5	0.0461	Antisense
F40F8.11	chrII	-	11130771	11132508	8	0	-7.69231	0.00692	Antisense
F40F9.7	chrV	+	9731929	9733989	11	0	-11.1111	0.00115	Antisense
F41H10.11	chrIV	+	5366855	5368854	5	0	-5	0.0461	Antisense	Direct
F42A10.5	chrIII	-	6171746	6172716	8	0	-7.69231	0.00692	Antisense	Direct
F44B9.4	chrIII	-	8005863	8009750	6	0	-5.88235	0.024	Antisense	Direct
F44B9.5	chrIII	-	8013817	8016466	5	0	-5	0.0447	Antisense
F52C6.10	chrII	-	1920017	1921106	7	0	-7.14286	0.0129	Antisense
F53F4.16	chrV	-	13621381	13621802	7	0	-7.14286	0.0129	Antisense
F54C9.9	chrII	+	8577979	8581444	6	0	-5.88235	0.0249	Antisense
F54F11.3	chrII	+	13517819	13522833	7	0	-7.14286	0.0134	Antisense	Direct
F54H12.8	chrIII	-	7966570	7969104	5	0	-5	0.0447	Antisense
F55F8.6	chrI	-	5657439	5658715	5	0	-5	0.0447	Antisense
F56B3.5	chrIV	+	797022	799855	5	0	-5	0.0461	Antisense
F56F11.4	chrIII	+	2855543	2865376	5	0	-5	0.0461	Antisense
F59A3.4	chrI	-	5507125	5509172	6	0	-5.88235	0.024	Antisense
F59C12.4	chrX	-	16602361	16602634	5	0	4.76	0.0446469	Sense	Inverse
F59E10.1	chrII	+	10873852	10877779	5	0	4.76	0.0459172	Sense
F59H6.9	chrII	-	2027624	2028813	6	0	-5.88235	0.024	Antisense
H06O01.1	chrI	-	7016135	7020786	5	0	4.76	0.0446469	Sense
H27M09.2	chrI	+	6850418	6851211	7	0	-7.14286	0.0134	Antisense	Direct
H38K22.2	chrIII	+	4313904	4317576	11	0	-11.1111	0.00115	Antisense
K02B2.5	chrIV	-	5947117	5947584	6	0	5.94	0.0205229	Sense	Inverse
K02F6.7	chrII	-	2525234	2529245	5	0	4.76	0.0446469	Sense
K04F10.4	chrI	+	6342232	6348475	6	0	-5.88235	0.0249	Antisense
K08B12.5	chrV	-	6258012	6267174	15	0	-14.2857	8.93e-05	Antisense	Direct
K09E9.3	chrX	-	15611766	15613713	5	0	-5	0.0447	Antisense
K10D2.2	chrIII	+	5185974	5187844	5	0	-5	0.0461	Antisense
K12D12.4	chrII	-	11863440	11865373	5	0	4.76	0.0446469	Sense
R04F11.3	chrV	-	12315101	12317157	5	0	-5	0.0447	Antisense
R05D11.5	chrI	+	8592084	8592919	6	0	-5.88235	0.0249	Antisense
R06A4.8	chrII	-	14350639	14357432	8	0	-7.69231	0.00692	Antisense
R06C7.1	chrI	+	7235381	7238787	5	0	4.76	0.0459172	Sense	Inverse
R144.7	chrIII	-	5008900	5017613	5	0	4.76	0.0446469	Sense	Inverse
T04C4.1	chrIV	+	2222828	2235710	6	0	-5.88235	0.0249	Antisense
T08B2.7	chrI	-	6206956	6211157	9	0	-9.09091	0.00372	Antisense	Direct
T10C6.5	chrV	+	16023323	16024158	7	0	-7.14286	0.0134	Antisense	Direct
T10G3.6	chrV	+	13497684	13498800	10	0	-10	0.00212	Antisense
T16H12.5	chrIII	-	10091096	10097944	7	0	-7.14286	0.0129	Antisense
T20F5.2	chrI	+	3908748	3909647	7	0	-7.14286	0.0134	Antisense
T20F5.7	chrI	-	3925838	3927889	9	0	-9.09091	0.00372	Antisense
T20H4.4	chrIII	-	7231101	7232811	6	0	-5.88235	0.024	Antisense
T20H4.5	chrIII	-	7232854	7234131	6	0	-5.88235	0.024	Antisense
T24D1.5	chrI	-	9956136	9958346	8	0	-7.69231	0.00692	Antisense
T25D3.2	chrII	-	154881	156043	8	0	-7.69231	0.00692	Antisense
T25G12.4	chrX	+	17222390	17224428	5	0	4.76	0.0459172	Sense
T26A5.2	chrIII	+	6467323	6471569	11	0	-11.1111	0.00115	Antisense	Direct
T27F2.3	chrV	+	11644740	11645252	5	0	-5	0.0461	Antisense
T27F6.5	chrI	+	12486939	12490877	5	0	-5	0.0461	Antisense
W02B12.11	chrII	+	11474011	11475658	6	0	-5.88235	0.0249	Antisense
W03B1.4	chrIV	+	4357628	4359869	12	0	-12.5	0.000619	Antisense
W03F11.6	chrI	+	2160043	2209630	5	0	4.76	0.0459172	Sense
W08F4.12	chrII	-	583077	584401	5	0	-5	0.0447	Antisense
W08G11.3	chrV	+	16367653	16372070	8	0	-7.69231	0.00727	Antisense	Direct
W09B6.4	chrII	-	1132373	1140845	7	0	-7.14286	0.0129	Antisense
Y110A7A.10	chrI	+	5107845	5110167	5	0	-5	0.0461	Antisense
Y17G9B.3	chrIV	+	4761050	4762778	9	0	-9.09091	0.00393	Antisense
Y22D7AL.10	chrIII	-	1617363	1618911	6	0	-5.88235	0.024	Antisense
Y37D8A.13	chrIII	-	12880917	12891618	13	0	-12.5	0.000309	Antisense	Direct
Y39E4B.3	chrIII	-	13087370	13090891	5	0	-5	0.0447	Antisense
Y40B1A.3	chrI	+	13354057	13358395	6	0	-5.88235	0.0249	Antisense	Direct
Y46G5A.12	chrII	-	12767230	12768126	6	0	-5.88235	0.024	Antisense
Y47D3B.9	chrIII	-	11463545	11470686	8	0	-7.69231	0.00692	Antisense
Y47G6A.4	chrI	+	3547092	3552007	7	0	-7.14286	0.0134	Antisense
Y48C3A.10	chrII	+	13338188	13339790	6	0	-5.88235	0.0249	Antisense
Y48G1C.2	chrI	+	72648	80344	5	0	-5	0.0461	Antisense
Y51F10.10	chrI	-	1950598	1958513	5	0	-5	0.0447	Antisense
Y53G8AR.3	chrIII	+	3311451	3317701	5	0	-5	0.0461	Antisense
Y54E2A.6	chrII	+	14772891	14778039	14	0	-14.2857	0.000181	Antisense
Y55F3BR.1	chrIV	+	874911	881909	5	0	-5	0.0461	Antisense
Y55F3BR.6	chrIV	-	835047	838536	7	0	-7.14286	0.0129	Antisense
Y56A3A.28	chrIII	-	11961833	11971239	7	0	-7.14286	0.0129	Antisense
Y57A10A.8	chrII	+	12164753	12170677	5	0	-5	0.0461	Antisense
Y57E12AL.1	chrV	+	7060792	7062676	6	0	-5.88235	0.0249	Antisense
Y59A8B.10	chrV	-	18069985	18077425	6	0	-5.88235	0.024	Antisense
Y67D8A.2	chrIV	+	3222439	3225309	12	0	-12.5	0.000619	Antisense
Y73B3A.9	chrX	-	150364	154445	6	0	-5.88235	0.024	Antisense
Y75B8A.7	chrIII	+	12152778	12159512	5	0	-5	0.0461	Antisense
Y87G2A.5	chrI	-	13548061	13559349	5	0	4.76	0.0446469	Sense
Y92H12BL.4	chrI	-	1376942	1385058	6	0	-5.88235	0.024	Antisense
ZK1010.3	chrIII	+	12979041	12980042	7	0	-7.14286	0.0134	Antisense
ZK1127.4	chrII	+	7053887	7055147	5	0	-5	0.0461	Antisense
ZK1307.8	chrII	+	9624560	9626336	6	0	-5.88235	0.0249	Antisense
ZK669.4	chrII	-	7942808	7945106	8	0	-7.69231	0.00692	Antisense
ZK858.4	chrI	+	9132529	9135745	5	0	-5	0.0461	Antisense

## Sheet: adr-1 adr-2
Gene locus	Chromosome	Strand	Gene chr start position	Gene chr stop position	Normalized # of WT reads	Normalized # of adr-1;adr-2 reads	Fold change (adr-1;adr-2 vs wt)	pVal	Read Type	Class
C32D5.11	chrII	-	6352492	6355862	1.17e-07	27	-25	1.17e-07	Antisense
F10B5.7	chrII	+	8162487	8168577	5.21e-07	24	-25	5.21e-07	Antisense
T02H6.2	chrII	+	702120	708614	1.02e-06	23	-25	1.02e-06	Antisense
T05B9.1	chrII	-	11260003	11261173	1.6e-06	23	-25	1.6e-06	Antisense
Y47G6A.23	chrI	-	3565041	3578690	6.43e-08	24	-25	6.43e-08	Antisense
C01F1.2	chrII	+	4299650	4300836	1.38e-06	19	-20	1.38e-06	Antisense	Direct
C05C10.2	chrII	+	9922169	9930752	1.47e-05	19	-20	1.37e-05	Antisense
C14A4.4	chrII	+	10587963	10592574	1.47e-05	19	-20	0.0207649	Antisense
D2013.8	chrII	+	9333934	9338817	3.88e-06	21	-20	4.47e-07	Antisense	Direct
F08F8.8	chrIII	-	7347165	7349091	1.02e-06	20	-20	1.02e-06	Antisense
F54C8.2	chrIII	+	9433974	9434997	1.38e-06	19	-20	1.38e-06	Antisense	Direct
W04A8.7	chrI	+	13861462	13887425	1.47e-05	19	-20	1.47e-05	Antisense
Y67H2A.10	chrIV	-	13282969	13289467	1.11e-05	20	-20	1.11e-05	Antisense
C26D10.1	chrII	-	8322543	8324984	8.05e-06	17	-16.6667	8.05e-06	Antisense
F08F8.9	chrIII	-	7349218	7353897	1.61e-05	16	-16.6667	1.02e-06	Antisense
F18C12.2	chrI	+	8083576	8095588	2.84e-05	18	-16.6667	0.00230805	Antisense
K02B12.7	chrI	-	8526753	8529264	0.000144054	16	-16.6667	0.000144054	Antisense	Direct
K07C5.3	chrV	+	10343003	10345457	5.7e-06	17	-16.6667	5.7e-06	Antisense
K11H3.4	chrIII	+	9832832	9838209	0.000105904	16	-16.6667	0.000105904	Antisense
Y102A5C.18	chrV	-	16958547	16965650	1.61e-05	16	-16.6667	1.61e-05	Antisense
Y56A3A.21	chrIII	+	11920621	11921287	2.84e-05	18	-16.6667	2.84e-05	Antisense
ZK632.6	chrIII	-	9814280	9817035	4.04e-06	18	-16.6667	4.04e-06	Antisense
B0024.11	chrV	-	10317459	10319504	0.000508985	14	-14.2857	0.000508985	Antisense
B0205.11	chrI	-	10732576	10733674	0.000508985	14	-14.2857	0.000508985	Antisense
C04F6.1	chrX	+	3403468	3408543	0.000508985	14	-14.2857	0.00227333	Sense
C05D11.7	chrIII	-	6415714	6421653	6.38e-05	14	-14.2857	0.00169256	Antisense
C44B9.4	chrIII	+	10882251	10893546	0.000389618	14	-14.2857	0.000389618	Antisense	Direct
D1037.1	chrI	+	3684803	3690149	0.000203484	15	-14.2857	0.000203484	Antisense
F10B5.1	chrII	+	8143813	8144552	7.59e-08	30	-14.2857	7.59e-08	Antisense
F11A10.7	chrIV	+	12085393	12086650	0.000389618	14	-14.2857	0.000389618	Antisense
F13G3.7	chrI	+	7304915	7307011	0.000203484	15	-14.2857	3.07e-07	Antisense
F46F11.6	chrI	-	5616598	5618554	0.000271249	15	-14.2857	0.000271249	Antisense
F49D11.10	chrI	-	10926903	10933696	4.71e-07	28	-14.2857	0.0222895	Antisense	Direct
R03D7.1	chrII	+	10926482	10930997	0.000203484	15	-14.2857	0.000203484	Antisense
R06F6.2	chrII	-	10787853	10793415	0.000271249	15	-14.2857	0.000271249	Antisense
T08B2.9	chrI	-	6211987	6214588	1.35e-07	30	-14.2857	0.00200955	Antisense	Direct
T10E9.2	chrI	+	6542100	6544954	0.000203484	15	-14.2857	0.000203484	Antisense
T22C1.3	chrI	+	7938553	7940108	0.000203484	15	-14.2857	0.000203484	Antisense
T23G5.2	chrIII	-	9231330	9236230	0.000271249	15	-14.2857	5.84e-06	Antisense
Y45F10D.7	chrIV	+	13788902	13796191	0.000203484	15	-14.2857	0.000203484	Antisense
Y48G9A.3	chrIII	+	2151955	2162086	0.000203484	15	-14.2857	0.000203484	Antisense
Y54E5B.2	chrI	-	14815630	14820209	0.000271249	15	-14.2857	0.000271249	Antisense
Y54G11A.3	chrII	+	14276552	14283861	2.36e-05	15	-14.2857	2.36e-05	Antisense
Y66D12A.5	chrIII	+	11581532	11588819	0.000389618	14	-14.2857	0.000389618	Antisense
Y71H2B.2	chrIII	+	2623158	2627725	0.000203484	15	-14.2857	0.000203484	Antisense
ZK863.3	chrV	-	12179488	12181387	0.000508985	14	-14.2857	0.000508985	Antisense	Direct
B0205.9	chrI	+	10720814	10723471	0.000743088	13	-12.5	0.000743088	Antisense
C01F6.1	chrIV	+	9096821	9101565	0.00141091	12	-12.5	0.00141091	Antisense
C16A3.4	chrIII	+	6381587	6382843	0.00141091	12	-12.5	0.00141091	Antisense
C35D10.4	chrIII	+	4863389	4866915	0.00141091	12	-12.5	0.00141091	Antisense
C53A5.3	chrV	+	14525385	14526955	0.00141091	12	-12.5	0.00141091	Antisense
F10G7.8	chrII	-	4696585	4698280	0.00177031	12	-12.5	0.00177031	Antisense	Direct
F22B5.7	chrII	+	8457748	8464448	6.77e-23	102	-12.5	6.77e-23	Antisense	Direct
F22B7.5	chrIII	+	8631072	8633436	9.76e-05	13	-12.5	3.59e-05	Antisense
F26F4.11	chrIII	-	4917193	4917973	0.000951356	13	-12.5	0.000951356	Antisense
F37C12.9	chrIII	-	7178958	7179508	0.00177031	12	-12.5	0.00177031	Antisense	Direct
F41G3.14	chrII	+	6741675	6742702	0.00141091	12	-12.5	0.00141091	Antisense
F41H10.6	chrIV	-	5356554	5361000	0.00025359	12	-12.5	0.00692727	Antisense
F43G9.3	chrI	-	8612721	8615124	0.000951356	13	-12.5	0.000951356	Antisense
F44B9.8	chrIII	-	8028061	8029578	0.000127197	13	-12.5	0.000127197	Antisense
F46F3.4	chrV	+	11675919	11685251	0.000743088	13	-12.5	0.000743088	Antisense
H15N14.1	chrI	+	7773411	7777571	0.00141091	12	-12.5	0.0031124	Antisense
K06H7.7	chrIII	-	8083650	8085441	0.00177031	12	-12.5	0.00177031	Antisense
K07A12.2	chrI	-	8676658	8681312	9.76e-05	13	-12.5	6.9e-17	Sense	Direct
R01H10.8	chrIII	+	10271150	10278473	0.000743088	13	-12.5	0.000743088	Antisense	Direct
R02F2.7	chrIII	-	5480354	5483731	0.00177031	12	-12.5	0.00177031	Antisense
R06C7.8	chrI	+	7251938	7255223	0.000951356	13	-12.5	6.23e-14	Sense	Direct
R102.5	chrIV	-	10695280	10697045	0.00177031	12	-12.5	0.00304065	Antisense
R151.2	chrIII	+	7212459	7214643	0.000198658	12	-12.5	0.00603179	Antisense
T01C3.9	chrV	+	15005087	15006374	0.000743088	13	-12.5	0.000743088	Antisense	Direct
T03F1.3	chrI	+	3867542	3869115	0.000743088	13	-12.5	0.000743088	Antisense
T05G5.8	chrIII	-	9753727	9757414	0.00025359	12	-12.5	0.00025359	Antisense
T07G12.11	chrIV	+	10558692	10560899	0.00141091	12	-12.5	0.00141091	Antisense
T07G12.12	chrIV	+	10561885	10563919	0.00141091	12	-12.5	0.00141091	Antisense
T28D9.4	chrII	+	6475641	6478024	0.00141091	12	-12.5	8.2e-06	Antisense
W05F2.6	chrI	+	3368814	3371445	0.00141091	12	-12.5	0.00141091	Antisense
Y102A5C.36	chrV	-	16926955	16927820	0.000127197	13	-12.5	0.000127197	Antisense	Direct
Y110A7A.8	chrI	+	5127852	5129537	0.000198658	12	-12.5	0.000198658	Antisense
Y37E11AR.2	chrIV	+	3744050	3747301	0.000743088	13	-12.5	0.000743088	Antisense
Y45F10A.2	chrIV	-	13510485	13512113	1.08e-08	37	-12.5	1.08e-08	Antisense	Direct
Y48G8AL.5	chrI	+	1193159	1207867	0.000743088	13	-12.5	0.000743088	Antisense	Direct
Y54G2A.2	chrIV	+	2788688	2796803	0.000743088	13	-12.5	2.36e-05	Antisense
Y71G12B.1	chrI	+	1823447	1825967	0.000743088	13	-12.5	3.21e-05	Antisense
Y92C3B.3	chrIII	-	1078137	1080469	0.00177031	12	-12.5	0.0167012	Antisense
ZC53.6	chrX	+	1917463	1919704	0.00141091	12	-12.5	0.00141091	Antisense	Direct
ZK652.3	chrIII	+	7858904	7859441	0.00141091	12	-12.5	0.00141091	Antisense
B0412.3	chrIII	+	795132	809354	0.00266517	11	-11.1111	0.00266517	Antisense
C08C3.4	chrIII	-	7793370	7795337	0.000505578	11	-11.1111	0.0199812	Antisense
C09H10.6	chrII	+	11106545	11107995	0.00266517	11	-11.1111	0.00266517	Antisense
C14A4.14	chrII	+	10582539	10584140	0.000404201	11	-11.1111	0.000404201	Antisense
C34E10.8	chrIII	-	5249046	5254150	0.00327744	11	-11.1111	0.00327744	Antisense
C50C3.1	chrIII	+	8191738	8193586	0.00266517	11	-11.1111	0.00266517	Antisense	Direct
F13H10.3	chrIV	-	11012084	11015853	0.000505578	11	-11.1111	0.000203484	Antisense
F15B10.1	chrIV	-	6603984	6606172	0.00327744	11	-11.1111	0.0159245	Antisense
F16B12.6	chrX	+	14102280	14107834	0.00266517	11	-11.1111	0.00266517	Antisense
F21A3.5	chrV	+	15538231	15542889	0.00266517	11	-11.1111	0.00266517	Antisense
F32A11.2	chrII	-	13153368	13156955	0.000505578	11	-11.1111	0.000505578	Antisense
F33G12.5	chrII	-	5036848	5040019	0.00327744	11	-11.1111	0.00327744	Antisense
F40F9.7	chrV	+	9731929	9733989	0.00266517	11	-11.1111	0.0159673	Antisense
F45F2.10	chrV	-	8513555	8518292	1.91e-05	22	-11.1111	1.91e-05	Antisense
F52C9.7	chrIII	+	5308560	5311036	0.00266517	11	-11.1111	0.00266517	Antisense	Direct
F54C1.3	chrI	+	4996841	5003161	0.00266517	11	-11.1111	2.58e-06	Antisense
F54H12.6	chrIII	-	7972310	7973315	0.000404201	11	-11.1111	0.0199812	Sense	Direct
H04D03.2	chrIII	-	10438077	10442292	6.8e-08	34	-11.1111	0.000791083	Antisense
K05C4.1	chrI	-	14719342	14720449	1.04e-05	23	-11.1111	1.04e-05	Antisense
K08F9.2	chrV	-	15134290	15136776	0.00327744	11	-11.1111	0.00327744	Antisense
K09F5.2	chrX	+	7727842	7733109	0.00327744	11	-11.1111	3.74e-05	Sense
M106.4	chrII	-	10863614	10868730	8.6e-10	44	-11.1111	0.0207649	Antisense	Direct
T10B5.5	chrV	+	1872243	1874600	0.00266517	11	-11.1111	0.0017983	Antisense	Direct
T23D8.7	chrI	+	9989790	9993503	0.00266517	11	-11.1111	0.00266517	Antisense
T24F1.2	chrII	+	11302807	11305585	1.27e-05	22	-11.1111	1.27e-05	Antisense	Direct
W10C8.2	chrI	-	2823468	2830294	0.00327744	11	-11.1111	0.00327744	Antisense
Y39A1A.13	chrIII	+	10646051	10648743	0.00266517	11	-11.1111	0.00266517	Antisense
Y49E10.3	chrIII	-	12374117	12377130	1.91e-05	22	-11.1111	3.27e-05	Antisense	Direct
Y59A8B.6	chrV	+	18022451	18042190	6.76e-08	33	-11.1111	6.76e-08	Antisense	Direct
Y82E9BR.18	chrIII	-	1467862	1483497	0.000505578	11	-11.1111	0.000505578	Antisense
ZK1098.10	chrIII	+	9546259	9556016	0.00266517	11	-11.1111	0.000581735	Antisense
ZK1248.10	chrII	-	5823783	5827411	0.00327744	11	-11.1111	0.00327744	Antisense
ZK652.9	chrIII	-	7857239	7858385	0.00327744	11	-11.1111	0.00327744	Antisense
B0205.3	chrI	-	10730916	10732380	0.00100796	10	-10	0.00100796	Antisense
B0511.10	chrI	-	10640516	10642270	3.51e-05	21	-10	3.51e-05	Antisense
C01B10.9	chrIV	+	6632205	6634956	0.00082241	10	-10	0.00082241	Antisense
C05D11.12	chrIII	-	6444818	6446848	0.00603179	10	-10	0.00603179	Antisense
C07G2.2	chrIII	-	4491599	4508083	7.64e-07	30	-10	0.00500268	Antisense	Direct
C08F8.3	chrIV	+	11155000	11156606	4.43e-05	20	-10	4.43e-05	Antisense	Direct
C14B1.4	chrIII	+	3705243	3706764	0.0050045	10	-10	0.0050045	Antisense
C14C10.3	chrV	-	12596367	12599131	0.00603179	10	-10	2.33e-06	Antisense	Direct
C17F4.5	chrII	-	3246315	3248114	6.41e-05	20	-10	6.41e-05	Antisense
C55A6.10	chrV	+	11505331	11508240	0.0050045	10	-10	0.0050045	Antisense
F11A10.2	chrIV	+	12084448	12085270	4.43e-05	20	-10	4.43e-05	Antisense
F18C12.3	chrI	+	8095733	8098417	0.00082241	10	-10	0.00082241	Antisense
F19F10.11	chrV	-	7581453	7587579	0.00603179	10	-10	0.00214129	Antisense
F22F7.1	chrV	+	2127532	2130047	0.00082241	10	-10	0.0109925	Antisense
F23C8.6	chrI	-	2420831	2421743	0.00603179	10	-10	0.00603179	Antisense	Direct
F28C6.3	chrII	-	8600366	8602403	0.00603179	10	-10	0.00603179	Antisense
F29C4.7	chrIV	-	121808	126225	0.00100796	10	-10	0.00382677	Antisense
F31C3.4	chrI	-	15050783	15052407	0.00100796	10	-10	0.00100796	Antisense
F37B12.2	chrII	-	9035485	9038222	0.00603179	10	-10	0.0031124	Antisense
F40F8.9	chrII	+	11126873	11127436	0.0050045	10	-10	0.0050045	Antisense
F42A10.1	chrIII	+	6173570	6175997	0.0050045	10	-10	0.0050045	Antisense
JC8.7	chrIV	+	13247228	13250461	0.00082241	10	-10	0.00082241	Antisense
K02C4.3	chrII	-	8080715	8087116	0.00603179	10	-10	0.00603179	Antisense	Direct
K08F11.4	chrIV	-	4710853	4712492	0.00603179	10	-10	0.000450367	Antisense
K08F4.2	chrIV	-	10127206	10128916	3.51e-05	21	-10	3.51e-05	Antisense
R151.10	chrIII	-	7230112	7230860	0.00603179	10	-10	0.00603179	Antisense
T05H4.14	chrV	-	6431313	6433479	0.00603179	10	-10	0.00603179	Antisense
T14B4.1	chrII	+	6736846	6741418	0.0050045	10	-10	0.0050045	Antisense	Direct
T19C3.8	chrIII	-	632023	634623	0.00603179	10	-10	0.00603179	Antisense
W09B6.2	chrII	+	1127981	1132353	0.0050045	10	-10	0.0050045	Antisense	Direct
W09C5.1	chrI	-	13626651	13628396	0.00603179	10	-10	0.00603179	Antisense
Y39A1A.1	chrIII	-	10596495	10600057	0.00603179	10	-10	0.00391952	Antisense
Y40B1B.6	chrI	+	13438055	13449918	2.37e-05	21	-10	2.37e-05	Antisense
Y47G6A.11	chrI	+	3449327	3462171	0.0050045	10	-10	0.0050045	Antisense	Direct
Y47G6A.6	chrI	+	3516479	3523392	0.00082241	10	-10	0.00082241	Antisense
Y48C3A.14	chrII	+	13389668	13401900	2.37e-05	21	-10	2.37e-05	Antisense	Direct
Y53C12A.3	chrII	-	9703733	9706310	0.00603179	10	-10	0.00603179	Antisense
Y59A8B.12	chrV	-	18085594	18086183	0.00603179	10	-10	0.00603179	Antisense
Y61A9LA.10	chrV	-	4607044	4615803	0.00603179	10	-10	0.00603179	Antisense
Y71D11A.2	chrIII	+	1143157	1145189	0.0050045	10	-10	0.012746	Antisense
Y94H6A.9	chrIV	-	2720319	2725855	0.00603179	10	-10	0.00382677	Antisense
ZC262.3	chrIII	-	8326496	8330866	0.00100796	10	-10	0.0159245	Antisense
ZK1128.5	chrIII	+	10120673	10122816	4.43e-05	20	-10	4.43e-05	Antisense
ZK270.2	chrI	-	14875750	14897356	3.51e-05	21	-10	0.00106177	Antisense
ZK418.8	chrIII	-	7083613	7084990	0.00100796	10	-10	0.00100796	Antisense	Direct
B0285.5	chrIII	+	4345309	4350050	0.00167332	9	-9.09091	0.00167332	Antisense
B0393.6	chrIII	-	4780402	4781945	0.00200955	9	-9.09091	0.00200955	Antisense
B0464.2	chrIII	+	9491540	9496947	0.00933153	9	-9.09091	0.00933153	Antisense
C02B10.2	chrIV	-	5090279	5091023	0.00200955	9	-9.09091	0.00200955	Antisense
C24F3.4	chrIV	-	10214956	10219279	0.00200955	9	-9.09091	0.00200955	Antisense
C28H8.9	chrIII	-	5903522	5906066	0.0110239	9	-9.09091	0.000519434	Antisense
C31H1.8	chrIV	-	5811638	5814125	2.52e-06	28	-9.09091	2.52e-06	Antisense
C47B2.6	chrI	+	12975172	12978737	0.00933153	9	-9.09091	4.58e-06	Antisense
C49H3.10	chrIV	-	7916681	7924110	0.0110239	9	-9.09091	0.0110239	Antisense
C50E3.5	chrV	+	7587976	7594719	0.00933153	9	-9.09091	0.00933153	Antisense
C52B11.2	chrX	+	1300144	1308131	0.00933153	9	-9.09091	0.00933153	Antisense	Direct
C53D6.4	chrIV	-	9019161	9020915	0.0110239	9	-9.09091	0.0110239	Antisense
D1022.7	chrII	-	7472668	7478474	0.00200955	9	-9.09091	0.00346112	Antisense	Direct
F10B5.2	chrII	+	8144730	8147178	0.00933153	9	-9.09091	0.00933153	Antisense
F14B4.2	chrI	-	9271434	9278680	0.0110239	9	-9.09091	0.00175735	Antisense	Direct
F15D3.6	chrI	-	11572110	11577478	0.0110239	9	-9.09091	0.0110239	Antisense	Direct
F25H5.5	chrI	-	9159928	9163217	0.000211812	18	-9.09091	0.000211812	Antisense
F27C8.6	chrIV	-	9587075	9588811	0.0110239	9	-9.09091	0.0214078	Antisense
F33E11.2	chrV	+	296598	300009	0.00933153	9	-9.09091	0.00933153	Antisense
F33E11.6	chrV	-	305438	311536	0.00200955	9	-9.09091	0.00933153	Antisense
F43G6.7	chrII	+	11810711	11811571	0.00933153	9	-9.09091	0.00933153	Antisense
F44E2.10	chrIII	-	8829399	8831016	0.0110239	9	-9.09091	0.0110239	Antisense
F46F11.1	chrI	+	5627821	5637621	0.00933153	9	-9.09091	0.00027206	Antisense
F52C12.4	chrIV	+	1923569	1946202	0.00933153	9	-9.09091	0.00933153	Antisense	Direct
F54A3.6	chrII	-	2225816	2232471	0.00200955	9	-9.09091	0.00200955	Antisense
F56B3.8	chrIV	+	773236	776628	0.00933153	9	-9.09091	0.00933153	Antisense	Direct
F57C9.4	chrI	+	4830135	4835619	0.00167332	9	-9.09091	1.96e-06	Antisense
F58A4.4	chrIII	-	9612185	9614182	0.00200955	9	-9.09091	0.00200955	Antisense
F58F6.4	chrIV	+	1347315	1352956	0.00167332	9	-9.09091	0.00167332	Antisense
K01G5.9	chrIII	+	10759648	10762688	0.00167332	9	-9.09091	0.00167332	Antisense
K02B12.5	chrI	-	8517473	8526614	0.00200955	9	-9.09091	0.00200955	Antisense
K07G5.2	chrI	+	7159722	7160750	0.00933153	9	-9.09091	0.00933153	Antisense
M03C11.3	chrIII	+	10404959	10414590	0.00933153	9	-9.09091	0.00933153	Antisense
M106.5	chrII	+	10869152	10870337	0.00167332	9	-9.09091	0.00167332	Antisense
R05F9.1	chrII	+	4908795	4911405	0.00933153	9	-9.09091	1.32e-05	Antisense
R06C1.3	chrI	-	11924774	11929497	0.000116812	19	-9.09091	0.000116812	Antisense
T08B2.7	chrI	-	6206956	6211157	0.00200955	9	-9.09091	0.000195277	Antisense	Direct
T09B4.2	chrI	+	6184080	6185308	0.00933153	9	-9.09091	0.00933153	Antisense
T21C9.12	chrV	+	10599078	10602121	0.00933153	9	-9.09091	0.00933153	Antisense
T26C12.1	chrIV	+	3258916	3263297	0.00167332	9	-9.09091	0.00167332	Antisense
W04D2.5	chrV	-	12493351	12494599	0.0110239	9	-9.09091	0.0110239	Antisense
W06A11.4	chrII	+	4055932	4057647	0.00167332	9	-9.09091	0.00167332	Antisense
Y102A5C.1	chrV	-	16917230	16918447	0.0110239	9	-9.09091	0.0110239	Antisense
Y110A7A.19	chrI	-	5162700	5164872	0.0110239	9	-9.09091	0.0110239	Antisense
Y17G9B.3	chrIV	+	4761050	4762778	0.00933153	9	-9.09091	0.00933153	Antisense
Y38C1AA.1	chrIV	+	208188	217390	0.00933153	9	-9.09091	3e-08	Antisense
Y48G1A.4	chrI	+	323860	330986	0.00933153	9	-9.09091	0.00933153	Antisense	Direct
Y51H1A.1	chrII	-	13855690	13860916	0.00200955	9	-9.09091	0.0317484	Antisense
Y55F3AM.3	chrIV	+	1012651	1019687	0.000152242	18	-9.09091	0.00554426	Antisense
Y59C2A.3	chrII	-	2215478	2219922	0.0110239	9	-9.09091	0.0110239	Antisense
Y73B6BL.18	chrIV	-	6362378	6373071	0.0110239	9	-9.09091	0.000450367	Antisense
ZK1098.9	chrIII	+	9544351	9545769	0.00933153	9	-9.09091	0.00933153	Antisense
ZK632.12	chrIII	+	9830699	9832326	8.23e-05	19	-9.09091	8.23e-05	Antisense
ZK632.5	chrIII	+	9808441	9812536	0.00933153	9	-9.09091	0.00933153	Antisense
ZK809.5	chrIV	+	11656706	11659368	0.00933153	9	-9.09091	0.00956362	Antisense	Direct
B0334.5	chrII	+	11496695	11499540	5.11e-06	26	-8.33333	5.11e-06	Antisense
C23G10.7	chrIII	-	6195936	6198360	1.47e-05	25	-8.33333	5.69e-07	Antisense
C38C10.4	chrIII	-	9391170	9393065	1.47e-05	25	-8.33333	1.47e-05	Antisense	Direct
C38C3.5	chrV	+	1475072	1479582	0.000280346	17	-8.33333	3.01e-07	Antisense	Direct
F10C2.4	chrV	+	12041583	12045298	0.000280346	17	-8.33333	0.000280346	Antisense
F16D3.4	chrI	-	8363954	8369910	0.000382273	17	-8.33333	0.000382273	Antisense
F56D2.1	chrIII	+	5592112	5594086	0.000280346	17	-8.33333	0.000280346	Antisense
K04F10.7	chrI	+	6366362	6368085	9.36e-06	25	-8.33333	9.36e-06	Antisense	Direct
T02C12.3	chrIII	+	4022138	4025595	0.000280346	17	-8.33333	0.000280346	Antisense	Direct
T28B11.1	chrV	-	10712136	10715223	8.2e-06	26	-8.33333	0.00679401	Antisense	Direct
W04B5.4	chrIII	-	2406302	2410963	0.000382273	17	-8.33333	0.000382273	Antisense
Y53H1C.2	chrI	-	11400602	11416411	8.2e-06	26	-8.33333	0.0358551	Antisense
Y79H2A.6	chrIII	-	12052218	12058339	0.000382273	17	-8.33333	0.000382273	Antisense
ZK550.3	chrIV	+	17250085	17254919	0.000280346	17	-8.33333	0.000280346	Antisense
B0035.1	chrIV	+	11310942	11312468	0.000513557	16	-7.69231	0.0207649	Antisense
B0414.8	chrI	-	5803955	5807294	0.00400641	8	-7.69231	0.0330849	Antisense
C06A8.4	chrII	+	7783780	7784574	0.0172552	8	-7.69231	0.0172552	Antisense
C07H6.4	chrIII	+	7499632	7503163	0.000513557	16	-7.69231	0.000513557	Antisense
C08C3.2	chrIII	-	7774706	7775955	0.0199812	8	-7.69231	0.0199812	Antisense
C14A4.1	chrII	+	10579899	10580890	0.000513557	16	-7.69231	0.000513557	Antisense
C15C6.4	chrI	+	12213119	12215169	0.0172552	8	-7.69231	0.0172552	Antisense	Direct
C16C10.6	chrIII	-	4166916	4168738	0.0199812	8	-7.69231	0.0199812	Antisense	Direct
C23G10.8	chrIII	-	6202567	6206147	4.4e-08	40	-7.69231	4.4e-08	Antisense
C27B7.1	chrIV	+	8891451	8892727	0.000513557	16	-7.69231	0.00102545	Antisense
C30C11.1	chrIII	+	8449673	8450427	0.00340464	8	-7.69231	0.00340464	Antisense	Direct
C30F8.2	chrI	-	5080312	5082260	0.0199812	8	-7.69231	0.0199812	Antisense
C32B5.10	chrII	-	946525	948187	0.0199812	8	-7.69231	0.0199812	Antisense
C32D5.9	chrII	-	6347213	6347637	0.0199812	8	-7.69231	0.0199812	Antisense
C33A12.3	chrIV	-	9511103	9512970	0.0199812	8	-7.69231	0.0199812	Antisense
C44C1.1	chrX	+	980773	983024	0.00340464	8	-7.69231	0.00340464	Antisense	Direct
C46A5.5	chrIV	-	7757984	7759610	0.0199812	8	-7.69231	0.0199812	Antisense
C46A5.6	chrIV	-	7760112	7763825	0.0199812	8	-7.69231	0.0199812	Antisense
C52E4.4	chrV	-	11980712	11982371	0.00400641	8	-7.69231	0.00400641	Antisense
E02H1.5	chrII	+	9595147	9596448	0.0172552	8	-7.69231	0.0172552	Antisense
E04F6.11	chrII	-	7217894	7222994	0.0199812	8	-7.69231	0.0286777	Antisense
E04F6.5	chrII	-	7192376	7194755	0.0199812	8	-7.69231	0.0199812	Antisense
F01F1.8	chrIII	-	5853482	5855639	0.000686344	16	-7.69231	0.00668401	Antisense	Direct
F08B4.1	chrIV	+	8692080	8696425	0.000513557	16	-7.69231	0.0476199	Antisense
F09F7.4	chrIII	+	5555359	5557274	0.0172552	8	-7.69231	0.000337351	Antisense
F10G7.10	chrII	-	4713662	4726127	0.0199812	8	-7.69231	8.46e-07	Antisense
F35G12.8	chrIII	+	4587472	4593089	5.97e-07	32	-7.69231	5.97e-07	Antisense
F36A2.13	chrI	-	8828409	8838585	3.31e-09	47	-7.69231	3.31e-09	Antisense
F42A10.5	chrIII	-	6171746	6172716	0.0199812	8	-7.69231	0.0199812	Antisense	Direct
F53A2.5	chrIII	+	13342563	13343200	0.0172552	8	-7.69231	0.0172552	Antisense
F53G12.10	chrI	+	111054	112227	0.0172552	8	-7.69231	0.0172552	Antisense
F54D10.5	chrII	-	3807088	3808216	0.00400641	8	-7.69231	0.00400641	Antisense
F54F2.7	chrIII	-	8806179	8807253	0.00400641	8	-7.69231	0.00400641	Antisense
F54H12.6	chrIII	-	7972310	7973315	0.0199812	8	-7.69231	0.0199812	Antisense	Direct
F55D10.3	chrX	+	4712249	4715049	0.0172552	8	-7.69231	0.0172552	Antisense	Direct
F55H2.7	chrIII	-	9513478	9516148	0.0199812	8	-7.69231	0.0199812	Antisense
F57C2.5	chrII	-	14526234	14528111	0.0199812	8	-7.69231	0.0199812	Antisense
K02F2.1	chrI	+	6838352	6843342	0.000513557	16	-7.69231	0.00603179	Antisense
K03D10.3	chrI	+	14118744	14127160	0.000513557	16	-7.69231	0.000513557	Antisense
K04D7.2	chrIV	+	10177938	10180277	0.0172552	8	-7.69231	0.00142042	Antisense
K07C11.9	chrV	-	8218258	8221296	0.0199812	8	-7.69231	0.0199812	Antisense
M03C11.5	chrIII	+	10416038	10421245	0.0172552	8	-7.69231	0.0172552	Antisense
R07H5.1	chrIV	+	11183109	11184066	0.00340464	8	-7.69231	0.00340464	Antisense
T01C3.7	chrV	-	15000743	15001944	0.0172552	8	-7.69231	5.09e-06	Sense
T01C3.8	chrV	+	15002527	15005031	0.000513557	16	-7.69231	0.000513557	Antisense
T02G5.4	chrII	+	7082040	7084328	0.0172552	8	-7.69231	0.0172552	Antisense
T03F1.12	chrI	-	3876046	3876706	0.00400641	8	-7.69231	0.00400641	Antisense
T04A8.7	chrIII	+	4695324	4697972	0.0172552	8	-7.69231	5.12e-07	Antisense
T05A10.1	chrX	+	10773017	10782313	0.0172552	8	-7.69231	0.0358551	Antisense	Direct
T05H4.11	chrV	-	6424234	6425935	0.0199812	8	-7.69231	0.0199812	Antisense
T07A9.9	chrIV	+	394016	396441	5.97e-07	32	-7.69231	0.0330849	Antisense
T09A5.8	chrII	-	7855746	7857530	0.0199812	8	-7.69231	0.0199812	Antisense
T10C6.6	chrV	+	16024298	16027418	0.00340464	8	-7.69231	0.0315857	Antisense
T13H5.7	chrII	+	8517080	8518343	0.00340464	8	-7.69231	0.00340464	Antisense
T22C1.1	chrI	+	7936259	7937645	0.00340464	8	-7.69231	0.00340464	Antisense
T23B12.2	chrV	+	8467242	8468921	3.1e-05	23	-7.69231	3.1e-05	Antisense
T24D1.5	chrI	-	9956136	9958346	0.0199812	8	-7.69231	0.0199812	Antisense
T24H10.5	chrII	+	9102628	9105370	0.00340464	8	-7.69231	0.00340464	Antisense	Direct
T25D3.4	chrII	+	147272	152701	0.00340464	8	-7.69231	0.00340464	Antisense
T26E3.3	chrI	+	12669368	12674436	0.00340464	8	-7.69231	0.00167332	Antisense
T27F6.7	chrI	+	12494814	12497340	0.0172552	8	-7.69231	0.0172552	Antisense
W06H3.2	chrV	-	16792736	16794978	0.000686344	16	-7.69231	0.00169256	Antisense
W09D10.1	chrIII	-	10737132	10739660	4.69e-05	23	-7.69231	4.69e-05	Antisense	Direct
Y11D7A.12	chrIV	-	9261786	9264240	0.0199812	8	-7.69231	0.00391952	Antisense
Y34D9A.8	chrI	-	1050925	1053647	0.0199812	8	-7.69231	2.47e-11	Antisense
Y43F4B.7	chrIII	+	13307381	13313271	0.00340464	8	-7.69231	0.00340464	Antisense
Y46E12BL.3	chrII	+	15230263	15232704	0.0172552	8	-7.69231	0.0172552	Antisense
Y47G6A.24	chrI	-	3604520	3605759	0.00400641	8	-7.69231	6.43e-08	Antisense
Y47G6A.28	chrI	+	3442189	3447705	0.0199812	8	-7.69231	1.82e-06	Sense
Y48B6A.2	chrII	+	14155196	14155472	0.0172552	8	-7.69231	0.0172552	Antisense
Y54E5A.5	chrI	-	14707152	14707854	0.0199812	8	-7.69231	0.0199812	Antisense
Y56A3A.17	chrIII	+	11915771	11917700	0.000513557	16	-7.69231	0.0286777	Antisense	Direct
Y56A3A.27	chrIII	-	11949898	11960049	0.00400641	8	-7.69231	0.00400641	Antisense
Y57E12AL.5	chrV	-	7058528	7059601	0.0199812	8	-7.69231	0.0199812	Antisense
Y65B4A.3	chrI	+	636849	637855	0.00340464	8	-7.69231	0.00340464	Antisense
Y66D12A.19	chrIII	+	11509007	11509668	0.0172552	8	-7.69231	0.0172552	Antisense
Y6D11A.2	chrIII	+	862293	865387	0.0172552	8	-7.69231	0.0172552	Antisense
Y74C10AR.3	chrI	-	2472418	2485383	0.0199812	8	-7.69231	0.0199812	Antisense
Y81G3A.3	chrII	+	13084076	13091394	3.54e-16	85	-7.69231	3.54e-16	Antisense
Y95D11A.1	chrI	+	10944202	10945683	0.00340464	8	-7.69231	0.00340464	Antisense	Direct
ZC504.4	chrX	-	10421586	10428582	0.0199812	8	-7.69231	0.0405429	Antisense
ZK1067.3	chrII	+	9223189	9225099	0.0199812	8	-7.69231	3.18e-08	Sense
ZK1225.6	chrI	+	13219073	13219533	0.0172552	8	-7.69231	0.0172552	Antisense
ZK484.4	chrI	-	6070680	6078849	0.0199812	8	-7.69231	2.59e-13	Antisense
ZK637.5	chrIII	+	8894992	8896552	0.0172552	8	-7.69231	0.0172552	Antisense
ZK669.4	chrII	-	7942808	7945106	0.0199812	8	-7.69231	0.0199812	Antisense
ZK829.4	chrIV	+	11953221	11955184	0.00340464	8	-7.69231	0.00340464	Antisense
B0205.7	chrI	+	10734010	10736598	0.000935338	15	-7.14286	0.000935338	Antisense
C02F4.1	chrIV	+	10484081	10492924	2.29e-07	36	-7.14286	2.29e-07	Antisense
C04G2.10	chrIV	+	10115361	10118055	0.000935338	15	-7.14286	0.000935338	Antisense	Direct
C07H6.5	chrIII	-	7496185	7497718	2.46e-07	37	-7.14286	2.46e-07	Antisense	Direct
C09D4.4	chrI	-	5479552	5484646	0.00692727	7	-7.14286	0.018113	Sense
C17H12.1	chrIV	-	6780388	6784323	0.00798749	7	-7.14286	0.00798749	Antisense	Direct
C29E4.8	chrIII	-	7950185	7951528	0.00122521	15	-7.14286	0.00122521	Antisense
C29F9.1	chrIII	+	132423	134369	0.00692727	7	-7.14286	0.00692727	Antisense
C38D4.4	chrIII	+	4793049	4795362	1.17e-11	60	-7.14286	1.17e-11	Antisense	Direct
C40H1.1	chrIII	+	9322219	9324807	0.00692727	7	-7.14286	0.00692727	Antisense
C43E11.9	chrI	-	4267330	4267968	0.00122521	15	-7.14286	0.00122521	Antisense
C47E8.4	chrV	-	14683746	14685530	0.00798749	7	-7.14286	0.00798749	Antisense
C48E7.2	chrI	+	6255036	6257637	0.00692727	7	-7.14286	0.00692727	Antisense
C52E4.6	chrV	-	11991007	11993744	0.00798749	7	-7.14286	0.00400641	Antisense
D1007.5	chrI	-	4580692	4583811	0.00122521	15	-7.14286	0.0288032	Antisense
F23F1.8	chrII	-	42206	44810	0.00122521	15	-7.14286	0.00603179	Antisense	Direct
F30A10.9	chrI	-	9504556	9505759	0.00798749	7	-7.14286	0.00798749	Antisense	Direct
F41H10.4	chrIV	+	5364548	5366569	0.00692727	7	-7.14286	0.00692727	Antisense
F44G4.1	chrII	+	8994554	8996188	0.00692727	7	-7.14286	0.00692727	Antisense	Direct
F48E8.7	chrIII	-	5446466	5448376	0.00122521	15	-7.14286	5.31e-12	Antisense
F53B6.7	chrI	+	8948772	8954344	0.00692727	7	-7.14286	0.00692727	Antisense
F54C8.7	chrIII	-	9451497	9452953	0.00122521	15	-7.14286	0.0334882	Antisense
F57C9.2	chrI	+	4844908	4847917	1.96e-06	30	-7.14286	1.96e-06	Antisense
H20J04.4	chrII	+	4329016	4334479	0.000935338	15	-7.14286	0.0315857	Antisense
T02E1.2	chrI	-	8220025	8223002	0.00798749	7	-7.14286	0.00798749	Antisense
T05E8.3	chrI	-	5472323	5479441	0.00122521	15	-7.14286	0.00122521	Antisense
T06D4.1	chrII	+	3381830	3383948	0.00692727	7	-7.14286	5.85e-08	Antisense
T10G3.5	chrV	-	13491048	13497353	4.33e-07	36	-7.14286	0.0317484	Antisense
T12D8.7	chrIII	+	13624163	13625821	0.000935338	15	-7.14286	0.000935338	Antisense	Direct
T19H12.2	chrV	+	4890414	4891408	0.00122521	15	-7.14286	1.21e-16	Sense	Direct
T28A8.5	chrIII	+	13501509	13503338	0.000935338	15	-7.14286	0.000935338	Antisense	Direct
Y17G7B.12	chrII	+	12023775	12025790	0.00692727	7	-7.14286	0.00692727	Antisense
Y2H9A.1	chrV	-	13433037	13437526	1.83e-08	44	-7.14286	1.83e-08	Antisense
Y39G8C.1	chrII	+	14068899	14083442	3.54e-06	29	-7.14286	3.54e-06	Antisense	Direct
Y47D3B.11	chrIII	+	11456757	11462763	0.00692727	7	-7.14286	0.00692727	Antisense
Y48E1C.2	chrII	+	13424413	13428878	0.00692727	7	-7.14286	0.00692727	Antisense
Y49A3A.1	chrV	+	14347751	14350463	0.00692727	7	-7.14286	0.00692727	Antisense
Y49E10.11	chrIII	-	12398803	12420544	0.00798749	7	-7.14286	0.00692727	Antisense
Y53C12A.6	chrII	-	9717433	9717874	0.00798749	7	-7.14286	0.00798749	Antisense
Y54E10A.15	chrI	-	3223154	3228023	8.32e-05	22	-7.14286	8.32e-05	Antisense
Y55F3AM.3	chrIV	+	1012651	1019687	0.00798749	7	-7.14286	0.00554426	Sense
Y59A8B.13	chrV	+	18087097	18094390	0.000935338	15	-7.14286	0.000935338	Antisense	Direct
Y71G12B.13	chrI	+	1702123	1707891	0.000935338	15	-7.14286	0.000935338	Antisense	Direct
Y75B8A.30	chrIII	-	12345200	12351218	0.00122521	15	-7.14286	0.00122521	Antisense	Direct
Y95B8A.4	chrI	+	907465	911135	0.00692727	7	-7.14286	0.00692727	Antisense	Direct
B0001.7	chrIV	-	12151159	12154212	2.33e-06	33	-6.66667	2.33e-06	Antisense
B0035.12	chrIV	-	11329734	11332842	0.00217314	14	-6.66667	0.00217314	Antisense
B0041.4	chrI	-	4645737	4646958	0.000146831	21	-6.66667	0.000146831	Antisense	Direct
B0240.4	chrV	-	11731293	11733448	0.00217314	14	-6.66667	0.00217314	Antisense
B0250.5	chrV	+	20489311	20492731	0.0315857	7	-6.66667	0.0315857	Antisense
B0336.6	chrIII	-	5690179	5692657	0.0358551	7	-6.66667	0.0358551	Antisense
BE0003N10.1	chrIII	+	1037496	1046036	0.0315857	7	-6.66667	0.0315857	Antisense
C01G8.9	chrI	-	5300983	5310917	1.73e-07	40	-6.66667	0.00382677	Antisense
C02C6.1	chrX	+	15568837	15573615	0.00169256	14	-6.66667	0.00200955	Antisense
C02F4.2	chrIV	-	10493833	10501032	0.0358551	7	-6.66667	2.29e-07	Antisense
C03H5.3	chrII	+	386192	387919	0.0315857	7	-6.66667	0.0315857	Antisense
C09G12.9	chrIV	-	3510470	3514550	0.00217314	14	-6.66667	0.00217314	Antisense
C09G9.6	chrIV	+	8889067	8890514	0.0315857	7	-6.66667	0.0315857	Antisense
C14B9.8	chrIII	-	8139535	8144554	2.33e-06	33	-6.66667	2.33e-06	Antisense
C17G10.1	chrII	+	5596542	5598291	0.0315857	7	-6.66667	0.0315857	Antisense
C24G6.1	chrV	+	5536684	5537697	0.0315857	7	-6.66667	0.0315857	Antisense
C27H5.3	chrII	+	7152639	7155223	0.000101153	21	-6.66667	0.000101153	Antisense	Direct
C28C12.12	chrIV	-	8494779	8496341	0.0358551	7	-6.66667	0.0358551	Antisense
C28D4.3	chrIV	-	9739538	9740829	0.00217314	14	-6.66667	0.00217314	Antisense
C29A12.3	chrV	+	10814087	10816690	0.000101153	21	-6.66667	0.00391952	Antisense
C32E8.5	chrI	+	3782138	3783182	0.0315857	7	-6.66667	0.0315857	Antisense
C33C12.10	chrII	-	2192364	2194115	0.0358551	7	-6.66667	0.0358551	Antisense
C34B4.2	chrV	+	13086174	13090422	0.0315857	7	-6.66667	0.0159245	Antisense
C37H5.6	chrV	-	4818751	4823330	0.000257868	20	-6.66667	0.00226127	Antisense	Direct
C41G7.2	chrI	+	9512442	9514746	0.00217314	14	-6.66667	2.37e-17	Sense	Direct
C48B4.11	chrIII	-	9564627	9565944	0.0358551	7	-6.66667	0.0358551	Antisense
F17A9.2	chrV	+	6107810	6114759	0.0315857	7	-6.66667	0.0315857	Antisense
F17C11.7	chrV	-	10956885	10958797	0.0358551	7	-6.66667	0.00230805	Antisense	Direct
F22D6.2	chrI	-	7080414	7081499	0.0358551	7	-6.66667	0.0358551	Antisense	Direct
F26A3.8	chrI	-	7643425	7649772	0.00217314	14	-6.66667	0.00217314	Antisense	Direct
F28F8.6	chrV	-	15575655	15576852	0.0358551	7	-6.66667	0.0358551	Antisense
F29D10.4	chrI	-	8845798	8851087	0.00217314	14	-6.66667	0.00217314	Antisense
F31E3.3	chrIII	+	6972145	6973636	0.00169256	14	-6.66667	0.00169256	Antisense
F33D11.10	chrI	-	5866765	5868132	0.0358551	7	-6.66667	0.0358551	Antisense
F39B2.10	chrI	+	14757065	14758419	0.00018125	20	-6.66667	0.00018125	Antisense
F43D9.2	chrIII	-	10500169	10503737	0.0358551	7	-6.66667	0.0358551	Antisense
F45C12.2	chrII	+	1732278	1733201	0.0315857	7	-6.66667	0.0315857	Antisense
F48C1.2	chrI	+	5319733	5321070	0.0315857	7	-6.66667	0.0315857	Antisense
F52C9.8	chrIII	+	5311204	5321691	2.7e-08	42	-6.66667	0.00266517	Antisense	Direct
F53A2.7	chrIII	+	13344796	13346763	0.0315857	7	-6.66667	0.0172552	Antisense
F53F4.16	chrV	-	13621381	13621802	0.0358551	7	-6.66667	0.0358551	Antisense
F54C8.3	chrIII	-	9435100	9441361	0.000257868	20	-6.66667	0.000257868	Antisense
F54C9.6	chrII	+	8571026	8572809	0.0315857	7	-6.66667	0.00679401	Antisense
F56G4.4	chrI	+	11374615	11380109	0.0315857	7	-6.66667	0.0315857	Antisense
F59G1.5	chrII	+	5918677	5920934	0.00169256	14	-6.66667	0.00169256	Antisense
H20J04.3	chrII	+	4335701	4338419	0.0315857	7	-6.66667	0.0315857	Antisense
K04D7.5	chrIV	+	10197790	10202962	0.00169256	14	-6.66667	0.0172552	Antisense
K08H10.2	chrV	+	10022469	10028131	0.00018125	20	-6.66667	0.00327744	Antisense	Direct
M04B2.3	chrIV	+	11521271	11522099	0.0315857	7	-6.66667	0.0315857	Antisense
R06F6.8	chrII	-	10812881	10819900	1.83e-05	27	-6.66667	0.0017983	Antisense	Direct
R119.7	chrI	+	364521	368511	6.84e-10	53	-6.66667	6.84e-10	Antisense
T02G5.12	chrII	-	7096298	7098532	1.83e-05	27	-6.66667	1.83e-05	Antisense
T04H1.2	chrV	-	12242306	12244925	0.0358551	7	-6.66667	0.0358551	Antisense	Direct
T05A12.3	chrIV	-	6883559	6887635	0.00217314	14	-6.66667	0.00217314	Antisense
T06D8.7	chrII	-	11236539	11237240	0.0358551	7	-6.66667	0.00692727	Antisense
T10C6.5	chrV	+	16023323	16024158	0.0315857	7	-6.66667	0.0315857	Antisense	Direct
T19E7.3	chrIV	-	5661324	5664402	0.0358551	7	-6.66667	0.0358551	Antisense	Direct
T20F5.2	chrI	+	3908748	3909647	0.0315857	7	-6.66667	0.0315857	Antisense
T20G5.2	chrIII	-	10214949	10216511	0.0358551	7	-6.66667	0.0358551	Antisense
T21B10.4	chrII	+	8940813	8942638	0.00169256	14	-6.66667	0.00169256	Antisense
T23G7.1	chrII	+	9169829	9172483	7.33e-07	34	-6.66667	7.33e-07	Antisense	Direct
T28A8.3	chrIII	+	13506046	13508353	0.0315857	7	-6.66667	0.0315857	Antisense
W02G9.5	chrV	+	2658031	2660776	0.00169256	14	-6.66667	0.00169256	Antisense	Direct
W06A7.3	chrV	-	14829169	14847290	1.83e-05	27	-6.66667	0.00167332	Antisense
Y18H1A.7	chrI	-	717941	719730	0.0358551	7	-6.66667	0.0358551	Antisense
Y37E11B.3	chrIV	-	3581062	3582904	0.0358551	7	-6.66667	0.0358551	Antisense	Direct
Y39A1A.3	chrIII	-	10595187	10596373	0.0358551	7	-6.66667	0.0358551	Antisense
Y39G10AR.21	chrI	+	2308977	2312046	0.00018125	20	-6.66667	0.00018125	Antisense	Direct
Y50C1A.1	chrI	+	398893	412513	0.0315857	7	-6.66667	0.0315857	Antisense
Y51A2D.7	chrV	+	18533918	18549008	0.000101153	21	-6.66667	0.0334882	Antisense	Direct
Y51H1A.3	chrII	+	13872774	13875204	0.00169256	14	-6.66667	0.00200955	Antisense
Y51H7C.6	chrII	+	1403349	1409124	0.00018125	20	-6.66667	0.0480708	Antisense
Y53H1A.5	chrI	+	11224827	11233326	0.0315857	7	-6.66667	0.0315857	Antisense
Y53H1C.1	chrI	-	11388737	11396651	0.0358551	7	-6.66667	0.0315857	Antisense
Y54E10BR.6	chrI	-	3031212	3032939	0.0358551	7	-6.66667	0.0358551	Antisense
Y54H5A.4	chrIII	-	5155490	5158726	0.0358551	7	-6.66667	0.0358551	Antisense
Y56A3A.28	chrIII	-	11961833	11971239	0.0358551	7	-6.66667	0.0358551	Antisense
Y57G11C.16	chrIV	+	14825659	14826325	0.0315857	7	-6.66667	0.0315857	Antisense
Y60A3A.10	chrV	-	19930868	19942005	0.0358551	7	-6.66667	0.0358551	Antisense
Y71F9AL.12	chrI	-	2871257	2875290	0.0315857	7	-6.66667	0.0050045	Sense
ZC302.1	chrV	-	10734115	10736642	0.00217314	14	-6.66667	0.00217314	Antisense
ZC395.3	chrIII	+	5275183	5277756	0.0358551	7	-6.66667	0.00679401	Sense	Direct
ZK1128.6	chrIII	+	10124075	10132618	0.0315857	7	-6.66667	4.43e-05	Antisense
ZK1248.13	chrII	-	5828653	5833200	0.00217314	14	-6.66667	0.00217314	Antisense
ZK328.2	chrIII	+	6009508	6012786	1.31e-06	33	-6.66667	1.31e-06	Antisense
ZK370.3	chrIII	+	8720107	8725150	0.0315857	7	-6.66667	0.0140946	Antisense	Direct
ZK418.4	chrIII	-	7070932	7072483	0.0358551	7	-6.66667	0.0358551	Antisense
ZK484.2	chrI	+	6081813	6085964	0.0358551	7	-6.66667	2.59e-13	Sense	Direct
C01G8.5	chrI	-	5284062	5291608	0.00382677	13	-6.25	8.17e-09	Antisense
C14C11.6	chrV	-	5658759	5660688	7.02e-06	31	-6.25	7.02e-06	Antisense
C17G10.9	chrII	-	5619561	5622457	0.00382677	13	-6.25	0.000799881	Antisense
C18H9.3	chrII	+	6684195	6688587	0.00304065	13	-6.25	0.00304065	Antisense
DY3.2	chrI	+	8763048	8765177	2.32e-06	32	-6.25	2.32e-06	Antisense
F10E9.8	chrIII	-	8314264	8318507	3.94e-08	45	-6.25	3.94e-08	Antisense
F20G4.3	chrI	-	7927064	7934537	0.000450367	19	-6.25	0.000450367	Antisense	Direct
F22B7.13	chrIII	+	8628842	8630685	3.59e-05	25	-6.25	3.59e-05	Antisense
F23C8.4	chrI	+	2434004	2435637	0.00304065	13	-6.25	0.00304065	Antisense
F28B3.7	chrI	-	4951570	4957670	3.19e-05	26	-6.25	0.00679401	Antisense	Direct
F29C4.6	chrIV	-	119404	121697	0.00382677	13	-6.25	0.00382677	Antisense
F32H2.3	chrI	-	8967086	8970063	0.000450367	19	-6.25	0.000450367	Antisense
F39B2.4	chrI	-	14777125	14787791	5.55e-05	25	-6.25	0.00214129	Antisense
F54C4.3	chrIII	-	70526	86383	0.00382677	13	-6.25	0.00382677	Antisense	Direct
F59B8.2	chrIV	-	9439239	9440742	0.00382677	13	-6.25	0.00382677	Antisense
H19N07.2	chrV	+	11113890	11118739	2.7e-07	38	-6.25	3.81e-05	Antisense
K06A5.1	chrI	+	6474060	6476729	0.00304065	13	-6.25	0.00304065	Antisense
K08E3.5	chrIII	-	13764168	13766033	0.00382677	13	-6.25	0.0153919	Antisense
K08F11.3	chrIV	-	4706996	4710384	0.000450367	19	-6.25	0.000450367	Antisense
K10D2.6	chrIII	-	5196926	5199619	0.00382677	13	-6.25	0.00382677	Antisense
M7.2	chrIV	+	11084076	11086019	2.32e-06	32	-6.25	2.32e-06	Antisense
R05D3.4	chrIII	+	8358743	8362410	0.00304065	13	-6.25	0.000174464	Antisense
R05F9.6	chrII	+	4889423	4891416	0.00304065	13	-6.25	0.00304065	Antisense
R08C7.10	chrIV	-	4442618	4445814	5.55e-05	25	-6.25	0.0286777	Antisense	Direct
R09E12.3	chrV	+	773551	774859	0.00304065	13	-6.25	0.00304065	Antisense
T24H7.1	chrII	+	6251363	6252802	1.76e-11	64	-6.25	1.76e-11	Antisense
T25G3.2	chrI	+	7554995	7559451	0.00304065	13	-6.25	0.00304065	Antisense	Direct
T27E9.7	chrIII	-	13460550	13462087	0.00382677	13	-6.25	0.00382677	Antisense
W01A8.1	chrI	+	7057198	7059326	0.000322963	19	-6.25	0.00169256	Antisense
W08D2.5	chrIV	-	9817395	9824606	3.19e-05	26	-6.25	3.19e-05	Antisense
Y113G7A.3	chrV	+	20086655	20100953	0.00304065	13	-6.25	0.00304065	Antisense
Y113G7B.17	chrV	-	20262988	20265092	0.00382677	13	-6.25	0.00382677	Antisense	Direct
Y18D10A.16	chrI	-	12903050	12904027	0.00382677	13	-6.25	0.00382677	Antisense	Direct
Y37D8A.6	chrIII	-	12856831	12857776	0.00382677	13	-6.25	0.00382677	Antisense
Y38C9A.1	chrV	+	107401	118162	2.7e-07	38	-6.25	2.7e-07	Antisense	Direct
Y39B6A.16	chrV	-	19099119	19101072	0.00382677	13	-6.25	0.00382677	Antisense
Y48A6B.3	chrIII	+	11008112	11008699	0.00304065	13	-6.25	0.00304065	Antisense
Y53C12B.1	chrII	-	9743052	9745989	3.01e-07	39	-6.25	3.01e-07	Antisense
Y71H2B.5	chrIII	+	2608007	2618845	0.00304065	13	-6.25	0.00304065	Antisense
Y73B3A.1	chrX	-	42874	47060	0.000450367	19	-6.25	0.000450367	Antisense
Y94H6A.5	chrIV	-	2688943	2703974	0.00382677	13	-6.25	0.0288032	Antisense
ZK1067.3	chrII	+	9223189	9225099	3.18e-08	44	-6.25	3.18e-08	Antisense
ZK430.1	chrII	+	4425201	4432604	2.59e-13	76	-6.25	2.59e-13	Antisense	Direct
ZK524.4	chrI	-	7461360	7466417	0.00382677	13	-6.25	0.00382677	Antisense
ZK546.1	chrII	+	4949887	4953474	1.53e-07	39	-6.25	0.00382677	Antisense
ZK856.1	chrV	+	10179504	10183106	0.00304065	13	-6.25	0.00304065	Antisense
B0334.8	chrII	-	11519414	11526978	0.00668401	12	-5.88235	0.00668401	Antisense
B0464.5	chrIII	+	9457554	9462161	0.00541783	12	-5.88235	0.00933153	Antisense	Direct
B0511.6	chrI	+	10625383	10628212	0.0140946	6	-5.88235	0.0140946	Antisense
C01F6.8	chrIV	-	9094545	9095633	0.0159245	6	-5.88235	0.00141091	Antisense
C07D8.6	chrX	+	7341456	7342728	0.00541783	12	-5.88235	0.00541783	Antisense
C09D4.5	chrI	-	5484832	5485715	0.000781815	18	-5.88235	0.000781815	Antisense	Direct
C16C10.4	chrIII	+	4171312	4172038	0.0140946	6	-5.88235	0.0140946	Antisense
C24A11.8	chrI	-	5402897	5408347	0.0159245	6	-5.88235	4.4e-08	Antisense
C24G6.3	chrV	+	5514331	5520435	0.0140946	6	-5.88235	0.0140946	Antisense
C25A1.1	chrI	+	10162377	10163518	0.0140946	6	-5.88235	0.0140946	Antisense
C29E4.4	chrIII	+	7928977	7932922	0.0159245	6	-5.88235	0.00228426	Sense	Direct
C33H5.7	chrIV	+	7774430	7775937	0.0140946	6	-5.88235	0.0140946	Antisense
C34B2.6	chrI	-	10676916	10682363	0.0159245	6	-5.88235	0.0159245	Antisense
C35E7.8	chrI	+	10808595	10810373	0.00541783	12	-5.88235	0.00541783	Antisense	Direct
C38D4.5	chrIII	+	4796877	4802540	1.47e-06	35	-5.88235	1.47e-06	Antisense
C42D4.8	chrIV	-	7160111	7165697	0.00668401	12	-5.88235	0.00668401	Antisense
C47E12.1	chrIV	+	10003725	10005396	0.0140946	6	-5.88235	0.0140946	Antisense
C47G2.4	chrII	-	11290768	11293489	0.0159245	6	-5.88235	0.0159245	Antisense
C48D1.2	chrIV	-	13198252	13206264	0.00668401	12	-5.88235	0.00668401	Antisense
C50F4.7	chrV	+	9547055	9547576	0.00541783	12	-5.88235	0.00541783	Antisense
F01F1.4	chrIII	+	5864497	5866453	0.0140946	6	-5.88235	0.0140946	Antisense
F01F1.7	chrIII	-	5848807	5853216	0.00668401	12	-5.88235	0.00668401	Antisense
F01G4.4	chrIV	+	11143316	11145895	2.05e-16	100	-5.88235	2.05e-16	Antisense	Direct
F12F6.6	chrIV	-	11561948	11566161	4.5e-13	82	-5.88235	4.5e-13	Antisense
F14D2.8	chrII	-	3347568	3349865	0.0159245	6	-5.88235	0.0159245	Antisense
F20D12.1	chrIV	+	7957562	7962104	1.4e-26	169	-5.88235	2.49e-05	Antisense	Direct
F21D5.6	chrIV	-	8740120	8741370	0.0159245	6	-5.88235	0.0159245	Antisense
F25B4.5	chrV	-	5678857	5682614	9.6e-05	24	-5.88235	9.6e-05	Antisense
F26D10.3	chrIV	+	17278918	17281140	9.58e-11	61	-5.88235	9.58e-11	Antisense	Direct
F26F4.6	chrIII	-	4891581	4893372	0.0159245	6	-5.88235	0.0159245	Antisense
F28D1.1	chrIV	+	12372222	12374647	0.0140946	6	-5.88235	0.0140946	Antisense
F29F11.3	chrV	+	10658167	10659632	0.0140946	6	-5.88235	0.0140946	Antisense
F35G12.3	chrIII	-	4571715	4578404	0.00668401	12	-5.88235	0.00419984	Antisense
F36H1.6	chrIV	+	11022572	11025841	6.34e-05	24	-5.88235	6.34e-05	Antisense
F37D6.2	chrI	-	10475663	10478120	0.0159245	6	-5.88235	5.89e-08	Antisense
F38H4.8	chrIV	-	11854948	11856346	0.0159245	6	-5.88235	0.0334882	Antisense
F44B9.4	chrIII	-	8005863	8009750	0.0159245	6	-5.88235	4.56e-13	Antisense	Direct
F44E5.1	chrII	-	11774189	11774475	0.0159245	6	-5.88235	0.0159245	Antisense
F46B6.5	chrV	-	9779521	9783034	9.6e-05	24	-5.88235	0.0198035	Antisense
F48A11.4	chrII	-	213190	216620	0.0159245	6	-5.88235	0.0159245	Antisense
F49E8.5	chrIV	-	7551721	7552848	0.0159245	6	-5.88235	0.0159245	Antisense
F52B5.5	chrI	+	8324111	8328844	0.00541783	12	-5.88235	9.54e-08	Antisense
F54C9.9	chrII	+	8577979	8581444	0.0140946	6	-5.88235	0.0140946	Antisense
F55C12.5	chrII	-	5867221	5873581	0.0159245	6	-5.88235	0.0115474	Antisense
F56D12.4	chrII	+	1327000	1350142	0.0140946	6	-5.88235	0.0021987	Antisense
F57B10.6	chrI	+	6558700	6562300	0.0140946	6	-5.88235	0.0140946	Antisense
F59A3.2	chrI	+	5512050	5516028	6.66e-09	49	-5.88235	0.000229567	Antisense
F59E12.2	chrII	+	5649745	5654199	0.000571982	18	-5.88235	0.000571982	Antisense
K04F10.3	chrI	+	6358603	6360461	0.0140946	6	-5.88235	0.00169256	Antisense
K04G7.3	chrIII	-	7145743	7153699	0.000781815	18	-5.88235	0.0137287	Antisense
K10C3.5	chrI	+	9863588	9869040	0.0140946	6	-5.88235	0.0294698	Antisense
M142.5	chrIII	+	10931089	10932108	0.0140946	6	-5.88235	0.0140946	Antisense
R05D3.11	chrIII	+	8375218	8380768	2.45e-09	53	-5.88235	2.45e-09	Antisense
R05F9.9	chrII	-	4899845	4902086	0.0159245	6	-5.88235	0.0159245	Antisense
R08D7.2	chrIII	+	8967885	8969537	0.0140946	6	-5.88235	0.0140946	Antisense
R11A8.5	chrIV	-	10366310	10367762	0.000781815	18	-5.88235	0.000781815	Antisense
R151.9	chrIII	-	7198080	7198813	0.0159245	6	-5.88235	0.0159245	Antisense
T08A11.1	chrIII	-	4248122	4263020	9.6e-05	24	-5.88235	9.6e-05	Antisense
T08D2.7	chrX	+	182690	190559	0.0140946	6	-5.88235	0.0140946	Antisense
T10B5.6	chrV	+	1869213	1870556	5.48e-16	96	-5.88235	5.48e-16	Antisense	Direct
T10H9.4	chrV	-	6655544	6656484	0.0159245	6	-5.88235	0.0159245	Antisense
T18H9.6	chrV	-	9209441	9212317	0.00668401	12	-5.88235	0.00668401	Antisense
T20G5.11	chrIII	-	10217239	10218538	0.00668401	12	-5.88235	0.00668401	Antisense
T20H4.4	chrIII	-	7231101	7232811	0.0159245	6	-5.88235	0.0159245	Antisense
T20H4.5	chrIII	-	7232854	7234131	0.0159245	6	-5.88235	0.0159245	Antisense
T22H9.1	chrV	+	359766	363669	0.0140946	6	-5.88235	0.0140946	Antisense
T23G7.4	chrII	-	9173094	9177072	0.0159245	6	-5.88235	0.0159245	Antisense
W02A11.4	chrI	+	12741593	12748576	0.0140946	6	-5.88235	0.0140946	Antisense
W02D3.8	chrI	-	6734030	6736162	0.0159245	6	-5.88235	0.0159245	Antisense
W03B1.4	chrIV	+	4357628	4359869	0.00541783	12	-5.88235	0.00541783	Antisense
W03H9.4	chrII	-	14133299	14142100	0.000781815	18	-5.88235	0.000781815	Antisense
W07G4.3	chrV	-	13038735	13041701	0.0159245	6	-5.88235	0.0159245	Antisense
W08D2.7	chrIV	+	9825671	9830595	0.00541783	12	-5.88235	0.00541783	Antisense	Direct
Y111B2A.4	chrIII	+	12499440	12506438	0.0140946	6	-5.88235	0.0140946	Antisense
Y113G7A.8	chrV	-	20071412	20083111	0.00668401	12	-5.88235	0.00668401	Antisense
Y22D7AL.10	chrIII	-	1617363	1618911	0.0159245	6	-5.88235	0.0159245	Antisense
Y37E11B.4	chrIV	-	3584308	3593594	1.56e-06	36	-5.88235	1.56e-06	Antisense
Y39B6A.2	chrV	+	19190510	19198887	0.00541783	12	-5.88235	0.00541783	Antisense	Direct
Y39E4B.5	chrIII	+	13169797	13172984	0.0140946	6	-5.88235	0.0140946	Antisense
Y39G10AL.3	chrI	-	2281620	2289748	0.0159245	6	-5.88235	0.0159245	Antisense
Y40B1A.3	chrI	+	13354057	13358395	0.0140946	6	-5.88235	0.0140946	Antisense	Direct
Y50D4A.1	chrV	+	1207890	1219848	0.0140946	6	-5.88235	0.0315857	Antisense
Y54E5B.4	chrI	+	14822036	14823959	0.00541783	12	-5.88235	0.00541783	Antisense
Y57G11C.12	chrIV	-	14796377	14797475	0.0159245	6	-5.88235	3.09e-06	Antisense
Y63D3A.6	chrI	-	14107755	14113166	0.00668401	12	-5.88235	2.98e-06	Antisense
Y67D8A.2	chrIV	+	3222439	3225309	0.00541783	12	-5.88235	0.0317484	Antisense
Y73B6BL.38	chrIV	+	6421587	6423481	0.0159245	6	-5.88235	3.94e-05	Sense	Direct
Y76A2B.5	chrIII	-	13546768	13548885	0.0159245	6	-5.88235	0.0159245	Antisense
ZC190.7	chrV	-	8686115	8686807	0.0159245	6	-5.88235	0.0159245	Antisense
ZC412.5	chrV	-	14874175	14875406	0.000781815	18	-5.88235	0.000781815	Antisense
ZK177.4	chrII	+	5506214	5508948	0.0140946	6	-5.88235	0.0140946	Antisense
ZK353.1	chrIII	+	8405792	8409321	0.0140946	6	-5.88235	1.9e-05	Antisense
B0001.3	chrIV	-	12143417	12145701	0.00134822	17	-5.55556	0.0115667	Antisense
C06A5.3	chrI	+	5986493	5990583	0.00100627	17	-5.55556	0.0391316	Antisense
C07G1.3	chrIV	+	8176465	8188861	0.00100627	17	-5.55556	0.00541783	Antisense	Direct
C07H4.2	chrII	-	9094628	9098522	0.00134822	17	-5.55556	0.00134822	Antisense
C08B6.7	chrV	-	10130375	10134119	0.000165183	23	-5.55556	0.000165183	Antisense
C10C6.1	chrIV	+	11436617	11447021	0.000111308	23	-5.55556	0.000111308	Antisense
C38C10.5	chrIII	+	9394046	9404330	3.01e-07	40	-5.55556	1.47e-05	Antisense
C43E11.1	chrI	+	4270697	4273330	0.00100627	17	-5.55556	0.00100627	Antisense
C47B2.4	chrI	-	12967203	12968270	4.58e-06	34	-5.55556	4.58e-06	Antisense	Direct
F07A11.3	chrII	-	11596680	11599723	0.000165183	23	-5.55556	0.000165183	Antisense
F52E1.1	chrV	+	8414063	8415234	0.00100627	17	-5.55556	0.00100627	Antisense
F57B9.10	chrIII	-	6959050	6961962	0.000165183	23	-5.55556	0.00787011	Antisense
K01C8.3	chrII	+	8270538	8273515	0.00100627	17	-5.55556	0.00285198	Antisense	Direct
R03D7.4	chrII	-	10943325	10945582	3.56e-05	28	-5.55556	3.56e-05	Antisense
R05D11.9	chrI	+	8593019	8596218	0.000111308	23	-5.55556	0.000111308	Antisense
T01G1.3	chrIV	-	11365588	11371763	1.01e-06	39	-5.55556	1.01e-06	Antisense	Direct
T07C4.10	chrIII	+	10320949	10325546	1.31e-11	69	-5.55556	1.31e-11	Antisense	Direct
Y38A8.3	chrII	-	4955631	4959861	3e-08	50	-5.55556	3e-08	Antisense	Direct
Y48E1B.12	chrII	+	13596863	13597782	0.000111308	23	-5.55556	0.000111308	Antisense
Y48G1C.7	chrI	-	96474	100613	0.00134822	17	-5.55556	0.00134822	Antisense	Direct
ZK381.4	chrIV	-	6974425	6977129	1.61e-17	117	-5.55556	0.000287849	Antisense	Direct
B0001.2	chrIV	-	12146463	12150945	0.0115667	11	-5.26316	0.0115667	Antisense
B0547.1	chrIV	+	5649520	5650971	0.00956362	11	-5.26316	0.00956362	Antisense	Direct
C05D2.6	chrIII	-	5600390	5603610	1.32e-05	32	-5.26316	0.00513489	Antisense
C09H10.3	chrII	+	11097768	11100242	0.00956362	11	-5.26316	0.00956362	Antisense
C27A2.1	chrII	+	5062121	5067086	0.00956362	11	-5.26316	0.00956362	Antisense	Direct
C46F11.2	chrIII	+	3650884	3652810	0.00956362	11	-5.26316	4.9e-09	Antisense
D2085.5	chrII	-	8669074	8677176	0.00028272	22	-5.26316	0.0334882	Antisense
F01G4.6	chrIV	-	11146911	11149478	1.32e-05	32	-5.26316	2.05e-16	Antisense
F02A9.6	chrIII	+	9092151	9099594	0.00956362	11	-5.26316	0.00956362	Antisense
F09F7.3	chrIII	+	5557320	5564635	0.000337351	21	-5.26316	0.000337351	Antisense
F09G2.9	chrV	-	7194341	7196116	0.0115667	11	-5.26316	0.0115667	Antisense
F13H8.2	chrII	+	6270323	6273954	0.00175735	16	-5.26316	0.00175735	Antisense
F16D3.2	chrI	-	8358716	8363834	0.0115667	11	-5.26316	0.0115667	Antisense
F17C11.10	chrV	-	10961819	10965515	0.00230805	16	-5.26316	0.00230805	Antisense	Direct
F18A1.6	chrII	-	7658252	7662449	0.00230805	16	-5.26316	0.0161628	Antisense
F20D12.4	chrIV	-	7943737	7946558	0.0115667	11	-5.26316	0.0115667	Antisense	Direct
F23B12.6	chrV	+	14447719	14449421	0.00956362	11	-5.26316	0.00956362	Antisense
F28B3.9	chrI	+	4929099	4932148	0.00956362	11	-5.26316	0.00956362	Antisense
F37E3.1	chrI	+	6422010	6425796	0.00956362	11	-5.26316	0.00956362	Antisense
F43E2.8	chrII	-	7350057	7352574	6.49e-07	42	-5.26316	3.42e-77	Antisense	Direct
F52H3.2	chrII	-	10030945	10033130	0.0115667	11	-5.26316	0.0115667	Antisense
F53F10.4	chrI	+	3824948	3826516	0.00175735	16	-5.26316	0.00175735	Antisense
H43I07.2	chrV	+	4199470	4203660	0.00956362	11	-5.26316	0.00956362	Antisense
K05C4.2	chrI	-	14720707	14721326	2.27e-07	44	-5.26316	2.27e-07	Antisense	Direct
K07C5.8	chrV	+	10362296	10365986	4.46e-06	33	-5.26316	4.46e-06	Antisense
K12C11.2	chrI	+	1340703	1341085	0.00956362	11	-5.26316	0.00956362	Antisense
K12D12.5	chrII	+	11860953	11863218	7.72e-06	32	-5.26316	7.72e-06	Antisense
M88.5	chrIII	+	4553635	4560392	0.000194362	22	-5.26316	2.32e-06	Antisense
R05D3.7	chrIII	-	8351167	8355093	1.32e-05	32	-5.26316	1.32e-05	Antisense	Direct
R05F9.10	chrII	-	4902279	4903783	0.000481	21	-5.26316	0.000481	Antisense
R06A4.9	chrII	+	14358388	14361388	7.72e-06	32	-5.26316	7.72e-06	Antisense	Direct
R10D12.14	chrV	+	13963945	13965309	0.00956362	11	-5.26316	6.31e-28	Antisense
R13A5.12	chrIII	+	7573276	7575063	4.46e-06	33	-5.26316	4.46e-06	Antisense
T11G6.5	chrIV	-	10835798	10842727	6.07e-05	27	-5.26316	6.07e-05	Antisense
T12A2.2	chrIII	+	6248590	6251188	0.000337351	21	-5.26316	0.000337351	Antisense
T12E12.4	chrIV	+	5538476	5541352	4.46e-06	33	-5.26316	7.64e-30	Antisense	Direct
T12F5.3	chrI	+	3727062	3730939	3.49e-10	63	-5.26316	3.49e-10	Antisense	Direct
T22D1.10	chrIV	-	6917123	6919390	0.00230805	16	-5.26316	0.00230805	Antisense
T23B12.4	chrV	+	8462304	8465549	0.00175735	16	-5.26316	0.00175735	Antisense
W07E6.1	chrII	-	471243	475939	0.00028272	22	-5.26316	0.00028272	Antisense
Y105E8A.19	chrI	-	14476708	14486749	0.00028272	22	-5.26316	0.00028272	Antisense
Y119C1A.1	chrI	-	4641407	4644056	0.000481	21	-5.26316	0.000481	Antisense
Y23H5A.3	chrI	+	2620659	2621856	0.00956362	11	-5.26316	0.00956362	Antisense
Y39E4B.2	chrIII	-	13165616	13169391	6.49e-07	42	-5.26316	6.49e-07	Antisense
Y39G10AR.9	chrI	+	2306985	2308913	0.00956362	11	-5.26316	0.00956362	Antisense
Y41D4B.13	chrIV	+	1597313	1601619	0.00956362	11	-5.26316	0.00956362	Antisense
Y47H9C.7	chrI	-	11891588	11893717	0.0115667	11	-5.26316	0.0115667	Antisense	Direct
Y48G1BL.2	chrI	+	203036	208397	3.84e-05	27	-5.26316	3.84e-05	Antisense
Y48G9A.1	chrIII	+	2174565	2197890	2.23e-08	49	-5.26316	2.23e-08	Antisense
Y51H4A.12	chrIV	-	16647083	16655979	0.000481	21	-5.26316	0.000481	Antisense	Direct
Y53F4B.13	chrII	+	15026081	15036934	0.00956362	11	-5.26316	0.00956362	Antisense
Y54G2A.22	chrIV	-	2919859	2922226	0.0115667	11	-5.26316	0.0115667	Antisense
Y54H5A.3	chrIII	-	5151999	5153113	0.0115667	11	-5.26316	0.0115667	Antisense
Y97E10AR.4	chrV	-	8008000	8010423	0.0115667	11	-5.26316	0.0115667	Antisense
ZC376.5	chrV	-	14183101	14185601	0.00028272	22	-5.26316	0.00028272	Antisense
ZC513.6	chrV	+	8029417	8031191	0.00956362	11	-5.26316	0.00956362	Antisense
ZK177.6	chrII	+	5501605	5503879	3.84e-05	27	-5.26316	3.84e-05	Antisense
ZK370.4	chrIII	-	8725234	8731280	0.0115667	11	-5.26316	0.0315857	Antisense	Direct
ZK795.3	chrIV	+	12559334	12560658	0.00956362	11	-5.26316	0.00956362	Antisense
ZK858.1	chrI	+	9118106	9121236	0.000194362	22	-5.26316	0.000194362	Antisense
ZK863.4	chrV	-	12181721	12184152	0.0115667	11	-5.26316	0.0115667	Antisense
B0280.3	chrIII	+	7123113	7124087	0.0286777	5	-5	0.0286777	Antisense
B0303.4	chrIII	+	8689867	8692851	0.0286777	5	-5	0.0286777	Antisense
B0495.9	chrII	-	7707505	7708637	0.0317484	5	-5	0.0317484	Antisense
C01H6.5	chrI	+	7216781	7220950	0.0167012	10	-5	1.73e-07	Antisense
C02F5.1	chrIII	+	8250555	8254242	2e-12	81	-5	2e-12	Antisense
C02F5.6	chrIII	+	8232577	8234454	0.0286777	5	-5	2e-12	Antisense
C03B8.4	chrIII	-	7700265	7709400	2.81e-09	61	-5	2.81e-09	Antisense
C05E11.1	chrX	+	4588739	4590418	0.0286777	5	-5	0.0286777	Antisense
C06A1.5	chrII	+	10579287	10579816	0.0167012	10	-5	0.0167012	Antisense
C06G4.2	chrIII	+	7981097	7986256	0.000581735	20	-5	5.47e-05	Antisense
C09E7.7	chrIII	-	6546849	6551169	0.0317484	5	-5	0.0317484	Antisense
C10C6.6	chrIV	-	11473337	11479222	0.00391952	15	-5	0.00391952	Antisense	Direct
C13B9.3	chrIII	-	6622615	6624912	0.000102829	26	-5	0.000102829	Antisense
C16A11.2	chrII	+	4238166	4244823	0.0286777	5	-5	1.87e-13	Antisense
C18G1.4	chrV	+	4755970	4758569	5.56e-12	77	-5	0.0159673	Antisense	Direct
C18G1.4	chrV	+	4755970	4758569	0.0317484	5	-5	0.0159673	Sense	Direct
C24H11.9	chrIII	+	11777524	11778950	0.0286777	5	-5	0.0286777	Antisense
C24H12.4	chrII	+	411220	416617	0.000581735	20	-5	2.1e-10	Antisense
C25A1.12	chrI	-	10191297	10192883	0.0317484	5	-5	0.0317484	Antisense
C25A1.16	chrI	+	10179006	10179684	0.0286777	5	-5	0.0286777	Antisense
C27D8.3	chrIV	-	12706683	12712284	0.0317484	5	-5	0.00208703	Antisense
C27H5.3	chrII	+	7152639	7155223	0.0317484	5	-5	0.000101153	Sense	Direct
C27H6.3	chrV	+	9981256	9982736	0.0167012	10	-5	0.0167012	Antisense	Direct
C29A12.1	chrV	-	10812382	10813369	0.00391952	15	-5	0.00391952	Antisense
C30F12.4	chrI	-	6972154	6973788	0.0317484	5	-5	0.0317484	Antisense
C34B2.10	chrI	-	10682610	10683029	0.0317484	5	-5	0.0317484	Antisense
C50C3.7	chrIII	-	8159155	8161264	0.0317484	5	-5	0.0317484	Antisense
C50C3.8	chrIII	-	8161791	8163252	0.0317484	5	-5	0.0317484	Antisense
D1044.6	chrIII	-	5535621	5543124	2.24e-05	31	-5	2.24e-05	Antisense	Direct
E02H1.6	chrII	+	9596621	9597449	0.0286777	5	-5	0.0286777	Antisense
EEED8.7	chrII	-	5387391	5388803	0.0317484	5	-5	0.0199812	Antisense
F07F6.4	chrII	-	5427421	5429540	0.0198035	10	-5	0.0198035	Antisense	Direct
F08B4.7	chrIV	-	8686956	8687791	0.0317484	5	-5	0.0317484	Antisense
F08F8.4	chrIII	-	7357587	7358996	0.0317484	5	-5	0.0317484	Antisense
F10E7.5	chrII	+	7111916	7112903	0.0286777	5	-5	0.0286777	Antisense
F11H8.1	chrIII	+	7021823	7023500	0.0286777	5	-5	0.0286777	Antisense
F12F6.1	chrIV	+	11585193	11588292	0.0286777	5	-5	0.0286777	Antisense	Direct
F13A7.14	chrV	+	16402199	16405584	0.00304424	15	-5	0.00304424	Antisense	Direct
F13C5.2	chrX	+	593960	596290	0.0167012	10	-5	0.0167012	Antisense	Direct
F14B4.3	chrI	-	9280969	9286553	0.0286777	5	-5	1.11e-06	Sense
F18E2.3	chrV	+	12763923	12767905	4.62e-06	35	-5	4.62e-06	Antisense	Direct
F20H11.3	chrIII	-	6606765	6608043	0.000173296	25	-5	0.000173296	Antisense
F22B7.6	chrIII	-	8626214	8628477	0.0317484	5	-5	9.76e-05	Antisense
F22G12.5	chrI	+	13162486	13182647	4.62e-06	35	-5	4.62e-06	Antisense
F26F4.7	chrIII	-	4894609	4899048	0.00391952	15	-5	0.00391952	Antisense
F26F4.8	chrIII	-	4903959	4905397	0.0317484	5	-5	0.0317484	Antisense
F26H9.6	chrI	+	9308435	9309761	0.0286777	5	-5	0.0286777	Antisense
F27D4.7	chrI	-	7723988	7724649	0.0317484	5	-5	0.0317484	Antisense
F28D1.10	chrIV	+	12404398	12408656	2.86e-09	57	-5	2.86e-09	Antisense	Direct
F29F11.1	chrV	-	10659741	10661439	0.0317484	5	-5	0.0317484	Antisense
F32D8.6	chrV	-	10896855	10897111	0.0317484	5	-5	0.0317484	Antisense
F36H12.2	chrIV	+	5274664	5276086	0.0286777	5	-5	0.0286777	Antisense
F39B2.6	chrI	+	14759906	14760621	0.0317484	5	-5	5.55e-05	Sense
F40F9.6	chrV	-	9725917	9729481	0.0286777	5	-5	0.0090873	Sense
F41H10.6	chrIV	-	5361970	5364257	0.0317484	5	-5	0.00692727	Antisense
F42A9.1	chrIV	+	8631414	8643986	0.0286777	5	-5	0.00507783	Antisense
F44B9.5	chrIII	-	8013817	8016466	0.0317484	5	-5	0.0317484	Antisense
F46B6.3	chrV	-	9775967	9777715	0.0198035	10	-5	0.0199258	Antisense
F46B6.6	chrV	-	9783149	9786840	0.0198035	10	-5	9.6e-05	Antisense	Direct
F52A8.6	chrI	+	7347361	7350385	0.0286777	5	-5	0.0159245	Antisense
F52B5.2	chrI	-	8315893	8318242	0.0317484	5	-5	0.0317484	Antisense
F52G3.3	chrX	-	16944793	16947943	0.0317484	5	-5	0.0317484	Antisense	Direct
F53F10.5	chrI	+	3818080	3821326	0.0317484	5	-5	0.000668218	Sense	Direct
F54D11.4	chrV	+	4616167	4617746	0.0286777	5	-5	0.0286777	Antisense	Direct
F54D5.9	chrII	-	11542557	11544747	0.0198035	10	-5	0.0198035	Antisense	Direct
F55F10.1	chrIV	+	4360842	4386526	6.86e-13	83	-5	6.86e-13	Antisense	Direct
F55F10.1	chrIV	+	4360842	4386526	0.0317484	5	-5	6.86e-13	Sense	Direct
F55G1.8	chrIV	-	7471046	7473193	8.26e-06	35	-5	8.26e-06	Antisense
F56A3.3	chrI	+	5176468	5182738	2.86e-09	57	-5	0.0199812	Antisense
F56B3.5	chrIV	+	797022	799855	0.0286777	5	-5	0.0286777	Antisense
F57C9.1	chrI	+	4848989	4850718	0.000581735	20	-5	0.0199812	Antisense
F59E10.2	chrII	-	10870750	10872528	0.0317484	5	-5	0.0317484	Antisense
JC8.6	chrIV	+	13241019	13243337	0.000581735	20	-5	0.00956362	Antisense	Direct
K02F3.11	chrIII	-	852927	853896	0.00391952	15	-5	0.00391952	Antisense
K06H7.4	chrIII	+	8085676	8087985	0.0286777	5	-5	0.0286777	Antisense
K07C5.1	chrV	-	10335436	10338327	0.0317484	5	-5	0.0317484	Antisense
K07D4.3	chrII	-	4043210	4044318	0.0286777	5	-5	9.45e-15	Sense
K07H8.10	chrIV	-	8286852	8289500	0.0286777	5	-5	0.000937904	Sense	Direct
K07H8.6	chrIV	+	8261153	8266348	4.69e-09	60	-5	0.000937904	Sense	Direct
K08D9.3	chrV	+	3210189	3223151	0.0167012	10	-5	0.0167012	Antisense
K10C8.1	chrV	-	12692519	12695233	0.0286777	5	-5	0.0391316	Sense
K11H3.1	chrIII	-	9853974	9858400	0.0198035	10	-5	0.000758671	Antisense
R01H10.7	chrIII	-	10261652	10267275	0.0286777	5	-5	0.00501518	Sense
R06C7.9	chrI	+	7255508	7258698	0.0286777	5	-5	6.23e-14	Antisense	Direct
R07E5.1	chrIII	+	4408521	4412120	0.0286777	5	-5	0.0286777	Antisense
R07E5.3	chrIII	+	4404756	4406256	0.000581735	20	-5	0.000581735	Antisense
R07G3.7	chrII	-	7610918	7613661	0.000173296	25	-5	9.78e-05	Antisense
R07H5.3	chrIV	+	11184192	11185946	0.0286777	5	-5	0.00419984	Antisense
R08C7.8	chrIV	-	4433078	4434534	0.0198035	10	-5	0.0198035	Antisense
R11D1.1	chrV	+	12704367	12707737	0.0286777	5	-5	3.28e-09	Antisense
R13G10.1	chrIII	-	3813531	3819658	0.0198035	10	-5	0.0198035	Antisense
T01E8.5	chrII	-	10242522	10247559	0.0286777	5	-5	1.12e-09	Sense	Direct
T01E8.6	chrII	-	10240334	10242411	0.0198035	10	-5	0.0198035	Antisense
T05E11.3	chrIV	+	11119422	11122910	0.0167012	10	-5	0.0167012	Antisense	Direct
T05E7.3	chrI	+	6188160	6192618	0.0286777	5	-5	0.0286777	Antisense
T05F1.6	chrI	+	9626252	9631162	4.62e-06	35	-5	4.62e-06	Antisense
T05F1.6	chrI	+	9626252	9631162	0.0317484	5	-5	4.62e-06	Sense
T06D8.8	chrII	-	11237523	11238835	0.0286777	5	-5	0.000291485	Sense	Direct
T06E8.1	chrV	-	10028330	10031054	0.0317484	5	-5	0.0317484	Antisense
T07A9.5	chrIV	-	415653	419958	0.0198035	10	-5	0.00522624	Antisense
T08G11.4	chrI	-	8902749	8905526	0.0317484	5	-5	6.28e-05	Antisense
T09A5.10	chrII	+	7860589	7863356	0.00391952	15	-5	1.37e-09	Sense	Direct
T10F2.3	chrIII	-	5165619	5169758	0.000173296	25	-5	0.000173296	Antisense
T10F2.4	chrIII	-	5170314	5172001	0.0317484	5	-5	0.0317484	Antisense
T10G3.6	chrV	+	13497684	13498800	0.0167012	10	-5	0.0167012	Antisense
T13F2.6	chrIV	+	9778261	9781177	0.0167012	10	-5	0.0167012	Antisense	Direct
T18H9.7	chrV	-	9213729	9217216	0.0286777	5	-5	0.00668401	Sense
T20B12.2	chrIII	+	7383963	7385707	0.0286777	5	-5	0.0286777	Antisense
T24B8.7	chrII	-	9042695	9053127	3.76e-05	30	-5	0.0394744	Antisense	Direct
T24G10.2	chrIII	-	5440716	5442719	0.0317484	5	-5	0.0317484	Antisense
T27F6.5	chrI	+	12486939	12490877	0.0286777	5	-5	5.67e-14	Antisense
W02F12.4	chrV	-	6704550	6706915	0.0317484	5	-5	0.0330591	Antisense
W03A3.2	chrIII	-	5791121	5802993	0.0317484	5	-5	0.0317484	Antisense
W06B4.1	chrII	+	4471391	4473544	0.0167012	10	-5	0.0167012	Antisense
W07A8.3	chrV	-	20725656	20739707	0.0317484	5	-5	0.0317484	Antisense
W07B3.2	chrIII	-	344305	348432	0.000173296	25	-5	0.0317484	Antisense
W09C3.4	chrI	+	4704622	4705803	0.0286777	5	-5	0.0286777	Antisense
Y105E8A.23	chrI	-	14552081	14565831	0.0198035	10	-5	0.00028272	Antisense
Y108G3AL.2	chrV	+	166993	176762	0.0286777	5	-5	0.0286777	Antisense
Y110A7A.16	chrI	-	5114121	5118855	0.0198035	10	-5	0.0198035	Antisense
Y119D3B.16	chrIII	-	1197435	1201998	0.00391952	15	-5	0.00391952	Antisense
Y23H5B.6	chrI	+	2489976	2497372	0.0167012	10	-5	0.0167012	Antisense	Direct
Y37D8A.10	chrIII	+	12874886	12875663	0.0286777	5	-5	0.0286777	Antisense
Y38H6C.10	chrV	-	20511687	20513424	0.00391952	15	-5	0.00391952	Antisense
Y39A1A.21	chrIII	-	10700576	10706904	0.0317484	5	-5	0.00603179	Antisense
Y42G9A.4	chrIII	-	6124789	6136221	0.00391952	15	-5	0.0472597	Antisense
Y43F8C.7	chrV	-	19641447	19643992	0.0317484	5	-5	0.0317484	Antisense	Direct
Y45F10C.3	chrIV	-	13665336	13666837	0.0317484	5	-5	0.0317484	Antisense
Y48A6A.1	chrIII	-	10951106	10953387	0.0317484	5	-5	0.0317484	Antisense
Y48B6A.13	chrII	-	14220858	14226162	0.000813057	20	-5	0.00316776	Antisense
Y48G1C.8	chrI	-	101414	107759	0.0198035	10	-5	0.0198035	Antisense
Y49F6B.1	chrII	+	3505011	3509609	0.0286777	5	-5	0.0286777	Antisense
Y50D7A.11	chrIII	+	265095	266592	0.0286777	5	-5	0.0286777	Antisense
Y51F10.10	chrI	-	1950598	1958513	0.0317484	5	-5	0.0317484	Antisense
Y53C10A.12	chrI	-	11953501	11961976	0.000102829	26	-5	0.0454634	Antisense	Direct
Y53C12B.2	chrII	-	9738903	9742806	0.0198035	10	-5	0.0198035	Antisense
Y54F10BM.1	chrIII	+	2331568	2341994	0.00304424	15	-5	0.00304424	Antisense
Y54G9A.7	chrII	-	13725000	13725713	0.00391952	15	-5	0.00391952	Antisense
Y55F3BL.1	chrIV	+	800817	806153	0.00304424	15	-5	0.00304424	Antisense
Y55F3BR.1	chrIV	+	874911	881909	0.0286777	5	-5	0.0286777	Antisense
Y55H10A.1	chrIV	+	3369192	3373463	0.0286777	5	-5	0.0286777	Antisense
Y57A10A.27	chrII	-	12269735	12274959	3.76e-05	30	-5	3.76e-05	Antisense
Y57A10A.8	chrII	+	12164753	12170677	0.0286777	5	-5	0.0286777	Antisense
Y59A8B.23	chrV	-	17954087	17966814	0.00391952	15	-5	0.00391952	Antisense
Y66D12A.10	chrIII	+	11565714	11567884	0.00304424	15	-5	0.00304424	Antisense
Y66H1B.4	chrIV	-	379899	383185	0.0317484	5	-5	0.0317484	Antisense
Y69A2AR.32	chrIV	+	2610418	2612427	0.0286777	5	-5	0.00227333	Antisense
Y71A12B.4	chrI	+	13902202	13913841	0.0286777	5	-5	0.0286777	Antisense
Y71F9AL.17	chrI	-	2895328	2900861	0.000173296	25	-5	0.000173296	Antisense
Y71F9AL.8	chrI	+	2878578	2880864	0.0286777	5	-5	0.0286777	Antisense
Y71H2AM.5	chrIII	+	2786193	2786669	0.0286777	5	-5	0.0286777	Antisense
Y73B6BL.3	chrIV	+	6416550	6417441	0.0286777	5	-5	0.00787011	Antisense
Y76A2B.1	chrIII	-	13514820	13523973	1.45e-07	47	-5	1.45e-07	Antisense	Direct
Y87G2A.7	chrI	+	13572366	13575610	0.0167012	10	-5	0.0167012	Antisense
Y95B8A.11	chrI	-	889933	895101	0.0317484	5	-5	0.0317484	Antisense
ZK1098.1	chrIII	+	9521975	9525294	0.000581735	20	-5	0.000581735	Antisense
ZK180.4	chrIV	-	4511888	4513314	0.0198035	10	-5	0.0198035	Antisense	Direct
ZK20.4	chrII	-	11649114	11651064	0.0317484	5	-5	0.0317484	Antisense
ZK328.5	chrIII	-	6013482	6017841	0.0167012	10	-5	1.31e-06	Sense
ZK370.7	chrIII	-	8746128	8748609	0.0317484	5	-5	0.0317484	Antisense
ZK484.7	chrI	-	6095132	6096518	0.0317484	5	-5	0.0317484	Antisense
ZK512.5	chrIII	+	9125749	9130704	0.0317484	5	-5	0.0334882	Sense
ZK637.8	chrIII	+	8905524	8911657	1.14e-07	46	-5	0.000158426	Antisense	Direct
ZK783.4	chrIII	-	7650494	7655960	0.0317484	5	-5	0.0317484	Antisense
ZK829.6	chrIV	-	11957517	11959740	0.0317484	5	-5	0.0317484	Antisense
ZK973.2	chrI	+	4373664	4379141	1.33e-05	31	-5	1.33e-05	Antisense	Direct
B0035.6	chrIV	+	11320770	11323604	0.000195277	24	-4.7619	0.000195277	Antisense
B0261.1	chrI	+	5263696	5268385	3.9e-05	29	-4.7619	3.9e-05	Antisense
B0414.3	chrI	+	5774587	5775613	0.000195277	24	-4.7619	0.000195277	Antisense
B0511.8	chrI	-	10636787	10638945	0.00136474	19	-4.7619	0.00136474	Antisense
C05D11.11	chrIII	-	6440086	6442942	1.86e-12	88	-4.7619	3.6e-08	Antisense
C15H11.3	chrV	-	14412382	14415770	5.09e-06	38	-4.7619	5.09e-06	Antisense	Direct
C28C12.9	chrIV	-	8496621	8498853	0.00136474	19	-4.7619	1.23e-09	Antisense
C33H5.4	chrIV	+	7797103	7800425	1.06e-09	63	-4.7619	0.0358551	Antisense	Direct
C47E8.8	chrV	+	14696996	14707570	7.89e-06	34	-4.7619	7.89e-06	Antisense
C47G2.5	chrII	+	11297616	11301181	7.46e-13	87	-4.7619	0.0159245	Antisense	Direct
C49H3.11	chrIV	-	7925439	7926354	2.16e-08	57	-4.7619	2.16e-08	Antisense	Direct
C50F4.11	chrV	-	9541755	9544199	3.06e-06	39	-4.7619	3.06e-06	Antisense	Direct
F20H11.1	chrIII	-	6589315	6592115	0.00136474	19	-4.7619	0.00136474	Antisense	Direct
F20H11.2	chrIII	-	6592709	6598470	6.29e-05	29	-4.7619	6.29e-05	Antisense	Direct
F30F8.1	chrI	-	7832705	7835398	5.09e-06	38	-4.7619	5.09e-06	Antisense
F31C3.3	chrI	-	15041433	15050147	0.00136474	19	-4.7619	0.00136474	Antisense
F48A11.5	chrII	-	217297	220640	6.29e-05	29	-4.7619	0.0159245	Antisense
F53F4.12	chrV	+	13626028	13627392	0.000996099	19	-4.7619	0.000996099	Antisense	Direct
F57B10.3	chrI	+	6569494	6572599	0.000996099	19	-4.7619	0.0391066	Antisense
F57H12.1	chrIV	+	7982508	7983913	0.000195277	24	-4.7619	0.000195277	Antisense	Direct
F58E10.3	chrV	-	14008749	14012196	2.55e-10	72	-4.7619	0.00554426	Antisense	Direct
H25P06.2	chrI	+	11323518	11333132	5.62e-07	43	-4.7619	0.0247649	Antisense	Direct
K10G6.3	chrII	+	3961682	3972128	0.000996099	19	-4.7619	0.000996099	Antisense	Direct
T01C3.7	chrV	-	15000743	15001944	5.09e-06	38	-4.7619	5.09e-06	Antisense
T01E8.5	chrII	-	10242522	10247559	1.12e-09	67	-4.7619	1.12e-09	Antisense	Direct
T08B2.5	chrI	+	6215792	6219913	0.000195277	24	-4.7619	0.0065968	Antisense	Direct
T11F8.3	chrIV	+	5470015	5473075	1.31e-10	69	-4.7619	1.31e-10	Antisense	Direct
T22F3.2	chrV	+	3586636	3589002	2.42e-08	53	-4.7619	6.8e-06	Antisense	Direct
Y106G6H.2	chrI	-	10433033	10435866	3.06e-06	39	-4.7619	0.0252786	Antisense	Direct
Y43F11A.5	chrII	-	12114905	12130883	3.06e-06	39	-4.7619	3.06e-06	Antisense	Direct
Y73E7A.2	chrI	+	1601840	1606850	0.000195277	24	-4.7619	0.000195277	Antisense
ZC395.8	chrIII	-	5268640	5273430	0.00136474	19	-4.7619	0.00136474	Antisense
ZC518.2	chrIV	-	12355591	12360760	2.16e-08	57	-4.7619	2.16e-08	Antisense
ZK1098.8	chrIII	-	9538930	9542256	6.83e-07	44	-4.7619	6.83e-07	Antisense	Direct
ZK1248.14	chrII	-	5833295	5836171	0.000290371	24	-4.7619	0.000290371	Antisense
ZK418.9	chrIII	-	7085127	7087670	0.00136474	19	-4.7619	0.00100796	Antisense
B0414.5	chrI	-	5788637	5791755	6.99e-10	70	-4.54545	6.99e-10	Antisense
C10H11.10	chrI	-	4759818	4761324	6.5e-14	103	-4.54545	6.5e-14	Antisense	Direct
C25G4.5	chrIV	-	12445955	12451264	3.11e-06	41	-4.54545	3.11e-06	Antisense
C26E6.6	chrIII	+	4935540	4937168	0.00522624	14	-4.54545	0.00522624	Antisense
C28C12.2	chrIV	+	8499300	8500063	0.0065968	14	-4.54545	1.23e-09	Sense	Direct
C37C3.2	chrV	+	7855197	7857914	0.00522624	14	-4.54545	0.00787011	Antisense
C42C1.4	chrIV	-	12270460	12275953	0.0065968	14	-4.54545	0.0057735	Antisense
C43E11.8	chrI	-	4242821	4247581	0.0065968	14	-4.54545	0.0065968	Antisense	Direct
C53H9.2	chrI	+	1832897	1834747	0.00522624	14	-4.54545	0.0110239	Antisense
F01F1.6	chrIII	+	5857160	5858901	1.97e-07	47	-4.54545	1.97e-07	Antisense	Direct
F21G4.2	chrX	+	9884256	9889638	7.23e-17	121	-4.54545	7.23e-17	Antisense	Direct
F25B4.6	chrV	-	5682703	5684573	0.0065968	14	-4.54545	0.0065968	Antisense
F26E4.1	chrI	+	9754111	9757888	0.00522624	14	-4.54545	0.00522624	Antisense	Direct
F26E4.8	chrI	-	9785922	9787367	0.000104746	28	-4.54545	0.000104746	Antisense
F28H1.3	chrI	+	3983206	3986386	1.55e-19	145	-4.54545	1.55e-19	Antisense	Direct
F33D4.5	chrIV	-	7707667	7709067	0.000483538	23	-4.54545	0.000483538	Antisense
F36D4.3	chrV	+	9386126	9400035	7.04e-25	183	-4.54545	5.82e-25	Antisense	Direct
F37D6.1	chrI	-	10479291	10485638	5.89e-08	55	-4.54545	5.89e-08	Antisense
F38A5.1	chrIV	-	6579828	6582660	0.0065968	14	-4.54545	0.0334882	Antisense
F44B9.3	chrIII	+	8010706	8013642	4.56e-13	92	-4.54545	5.32e-05	Antisense	Direct
F45G2.3	chrIII	+	13423562	13426070	0.00522624	14	-4.54545	0.00522624	Antisense
F49E8.3	chrIV	-	7543967	7547105	5.03e-09	64	-4.54545	4.71e-07	Antisense
F52B5.3	chrI	-	8318345	8323975	9.54e-08	52	-4.54545	9.54e-08	Antisense
F53A3.3	chrIII	+	1950480	1951415	0.00522624	14	-4.54545	0.0315857	Antisense
F53G2.6	chrII	-	2460866	2472863	6.99e-07	46	-4.54545	6.99e-07	Antisense
F55C5.8	chrV	-	12288898	12291635	0.0065968	14	-4.54545	0.0065968	Antisense
F56C9.10	chrIII	-	7330151	7335055	0.0065968	14	-4.54545	4.93e-05	Antisense
H19N07.1	chrV	-	11110424	11113047	3.81e-05	32	-4.54545	3.81e-05	Antisense	Direct
H27M09.3	chrI	+	6847509	6849922	9.51e-07	42	-4.54545	9.51e-07	Antisense	Direct
K07D4.3	chrII	-	4043210	4044318	9.45e-15	111	-4.54545	9.45e-15	Antisense
M03C11.7	chrIII	-	10424108	10427870	0.000483538	23	-4.54545	0.000483538	Antisense	Direct
R01H10.1	chrIII	-	10244952	10248799	0.0065968	14	-4.54545	0.0065968	Antisense
R09B3.3	chrI	-	11910317	11911011	0.000483538	23	-4.54545	0.000483538	Antisense	Direct
R13H8.1	chrI	+	10750620	10776665	2.26e-05	32	-4.54545	0.0198035	Antisense	Direct
T06E6.1	chrV	-	15393093	15394931	2.3e-05	33	-4.54545	2.3e-05	Antisense
T07A9.11	chrIV	+	385908	386549	0.00522624	14	-4.54545	0.00522624	Antisense
T07D4.4	chrII	+	8884829	8889590	2.26e-05	32	-4.54545	0.0288032	Antisense	Direct
T08A11.2	chrIII	-	4263770	4269242	0.0065968	14	-4.54545	0.0065968	Antisense
T19H12.2	chrV	+	4890414	4891408	1.21e-16	120	-4.54545	1.21e-16	Antisense	Direct
W02D3.2	chrI	+	6736686	6741175	0.00522624	14	-4.54545	0.00522624	Antisense
W03G1.6	chrIV	-	506749	519456	6.99e-07	46	-4.54545	0.0404929	Antisense	Direct
Y106G6H.7	chrI	+	10446667	10452062	0.00522624	14	-4.54545	0.00522624	Antisense
Y22D7AL.5	chrIII	+	1619738	1625790	4.51e-13	90	-4.54545	0.0159245	Antisense	Direct
Y37A1B.2	chrIV	-	14060999	14068512	0.0065968	14	-4.54545	2.07e-08	Antisense
Y41C4A.9	chrIII	-	11710857	11718518	0.0065968	14	-4.54545	0.0065968	Antisense
Y48B6A.3	chrII	+	14155670	14165921	3.78e-10	69	-4.54545	3.78e-10	Antisense	Direct
Y53C12B.3	chrII	+	9746639	9749894	0.00522624	14	-4.54545	0.0198035	Antisense	Direct
Y54F10BM.2	chrIII	+	2314422	2326890	0.000331735	23	-4.54545	0.000331735	Antisense
Y75B8A.8	chrIII	+	12160767	12170827	0.00522624	14	-4.54545	0.00522624	Antisense
ZK1055.1	chrV	+	6594208	6599123	4.66e-39	295	-4.54545	4.66e-39	Antisense	Direct
B0365.1	chrV	+	13116482	13120115	0.00169256	18	-4.34783	0.00169256	Antisense
B0393.4	chrIII	-	4759727	4763573	0.0334882	9	-4.34783	0.0334882	Antisense
C01H6.7	chrI	+	7224731	7227762	0.0288032	9	-4.34783	0.0288032	Antisense
C04F12.9	chrI	-	9710149	9710757	0.00227333	18	-4.34783	0.00227333	Antisense	Direct
C05D11.2	chrIII	+	6433182	6436286	0.00169256	18	-4.34783	0.00169256	Antisense	Direct
C06A8.5	chrII	+	7781508	7783280	3.75e-10	71	-4.34783	3.75e-10	Antisense	Direct
C15A11.2	chrI	+	7387353	7388713	0.0288032	9	-4.34783	0.0288032	Antisense
C17G10.4	chrII	-	5587611	5593398	0.000799881	22	-4.34783	0.0315857	Antisense
C26E6.3	chrIII	+	4944474	4947268	1.3e-05	35	-4.34783	1.3e-05	Antisense
C27A12.2	chrI	+	6041671	6046011	0.0288032	9	-4.34783	0.0288032	Antisense
C29H12.5	chrII	-	6110550	6113343	1.39e-05	36	-4.34783	1.39e-05	Antisense
C30G12.6	chrII	-	7292131	7295955	1.39e-05	36	-4.34783	0.0199812	Antisense
C34D4.14	chrIV	-	7134329	7144547	5.08e-09	66	-4.34783	5.08e-09	Antisense	Direct
C39E9.12	chrIV	+	13093979	13095348	6.8e-08	53	-4.34783	6.8e-08	Antisense	Direct
C41G7.3	chrI	-	9514991	9518725	5.12e-06	40	-4.34783	5.12e-06	Antisense
C49H3.9	chrIV	-	7907075	7909457	0.000173423	27	-4.34783	0.000173423	Antisense
C52E12.4	chrII	-	7012740	7022448	4.27e-07	49	-4.34783	4.27e-07	Antisense
C56E6.1	chrII	+	6532127	6540107	0.00169256	18	-4.34783	0.00169256	Antisense
D1007.12	chrI	+	4585141	4586139	0.0288032	9	-4.34783	0.0288032	Antisense	Direct
D1054.15	chrV	-	10806171	10807870	0.0334882	9	-4.34783	0.0334882	Antisense	Direct
D2023.6	chrV	+	11827301	11829334	0.0288032	9	-4.34783	0.0288032	Antisense
D2030.2	chrI	+	7574189	7578515	0.0288032	9	-4.34783	0.0288032	Antisense
D2063.3	chrV	-	4338867	4341294	0.0334882	9	-4.34783	0.00422221	Antisense
D2096.12	chrIV	+	8363444	8366359	7.78e-06	36	-4.34783	7.78e-06	Antisense
EEED8.9	chrII	-	5393271	5395667	0.0334882	9	-4.34783	0.0334882	Antisense
F26F12.7	chrV	+	5826843	5832677	3.01e-09	63	-4.34783	3.01e-09	Antisense	Direct
F38A1.8	chrIV	-	1232900	1239823	0.0334882	9	-4.34783	0.0334882	Antisense
F38H4.7	chrIV	-	11851003	11854854	0.0334882	9	-4.34783	0.0334882	Antisense
F41H10.10	chrIV	-	5390347	5391546	7.75e-13	98	-4.34783	7.75e-13	Antisense
F45E12.2	chrII	+	7305800	7308620	0.0288032	9	-4.34783	0.0288032	Antisense
F53F8.5	chrV	-	20695946	20699425	0.0334882	9	-4.34783	0.0334882	Antisense
F53H1.1	chrIV	-	1297257	1309644	0.0334882	9	-4.34783	0.0334882	Antisense
F54C8.5	chrIII	-	9454132	9455915	0.0334882	9	-4.34783	0.0334882	Antisense
F54E7.8	chrIII	-	5677903	5678985	0.0334882	9	-4.34783	0.0334882	Antisense
F57B9.5	chrIII	+	6931940	6933500	0.00011185	27	-4.34783	0.00011185	Antisense
F58G1.1	chrII	+	12919485	12923286	7.29e-27	210	-4.34783	7.29e-27	Antisense	Direct
K02F2.4	chrI	+	6812700	6814049	0.0288032	9	-4.34783	0.0288032	Antisense	Direct
K06H7.3	chrIII	+	8088465	8091399	0.0288032	9	-4.34783	0.0288032	Antisense
K08D10.12	chrIV	+	4178455	4179518	0.0288032	9	-4.34783	0.0288032	Antisense	Direct
M01G5.3	chrIII	-	1509396	1517983	0.0334882	9	-4.34783	0.0334882	Antisense
R01H2.3	chrIII	-	7058450	7060528	0.0334882	9	-4.34783	0.0334882	Antisense
R07E5.8	chrIII	+	4419826	4423227	0.0288032	9	-4.34783	0.0288032	Antisense
R10E11.1	chrIII	+	9766414	9774723	2.39e-08	57	-4.34783	0.00956362	Antisense	Direct
R166.4	chrII	-	10539380	10541917	0.0334882	9	-4.34783	0.0334882	Antisense
R74.1	chrIII	-	4181684	4186757	0.0334882	9	-4.34783	0.0334882	Antisense
T07D3.7	chrII	+	873181	878951	0.0288032	9	-4.34783	0.000249686	Antisense
T08G11.1	chrI	-	8905631	8916797	6.28e-05	31	-4.34783	0.0140946	Antisense	Direct
T12F5.5	chrI	-	3732881	3740481	0.0334882	9	-4.34783	3.49e-10	Antisense
W01A11.2	chrV	+	6497092	6498474	0.00169256	18	-4.34783	0.00169256	Antisense	Direct
W02G9.3	chrV	+	2671462	2673972	0.0288032	9	-4.34783	0.0288032	Antisense
W06D4.6	chrI	+	9065078	9070256	0.00169256	18	-4.34783	0.00169256	Antisense
W08E12.7	chrIV	+	3295140	3296517	0.00011185	27	-4.34783	0.00011185	Antisense	Direct
W09D10.4	chrIII	-	10711446	10716073	0.0334882	9	-4.34783	0.0334882	Antisense
Y113G7B.16	chrV	+	20265494	20271120	0.0288032	9	-4.34783	0.0288032	Antisense
Y116F11B.12	chrV	-	19876784	19890738	0.0334882	9	-4.34783	4.61e-06	Antisense
Y17G7A.1	chrII	+	11916429	11917427	0.0334882	9	-4.34783	1.36e-14	Sense	Direct
Y39A1A.12	chrIII	+	10643015	10645841	0.00169256	18	-4.34783	0.00169256	Antisense
Y39B6A.35	chrV	+	18998309	19000864	0.000559801	22	-4.34783	0.000559801	Antisense	Direct
Y42H9AR.1	chrIV	+	8113486	8115352	0.00011185	27	-4.34783	0.00011185	Antisense
Y43F8C.6	chrV	-	19633024	19640871	6.99e-07	48	-4.34783	6.99e-07	Antisense
Y45F10C.6	chrIV	+	13653922	13655819	0.0288032	9	-4.34783	0.0288032	Antisense
Y48C3A.9	chrII	-	13325797	13330690	0.0334882	9	-4.34783	0.0334882	Antisense
Y48G1C.1	chrI	+	93030	94882	9.38e-16	118	-4.34783	9.38e-16	Antisense	Direct
Y50D7A.8	chrIII	-	335954	343240	0.0334882	9	-4.34783	0.0334882	Antisense
Y59A8A.3	chrV	-	17846153	17855953	0.0334882	9	-4.34783	0.0334882	Antisense
Y60A3A.12	chrV	-	19904498	19911361	8.27e-09	63	-4.34783	8.27e-09	Antisense	Direct
Y65B4BL.4	chrI	-	502957	506253	0.0334882	9	-4.34783	0.0334882	Antisense
Y69A2AR.28	chrIV	-	2612447	2613060	0.00227333	18	-4.34783	0.00227333	Antisense
Y94H6A.3	chrIV	+	2676508	2678446	0.0288032	9	-4.34783	0.0288032	Antisense
ZK1058.2	chrIII	-	3908914	3914115	0.0334882	9	-4.34783	0.0334882	Antisense
ZK512.2	chrIII	-	9141729	9144705	0.0334882	9	-4.34783	0.0334882	Antisense
ZK945.3	chrII	+	10100231	10102981	0.00169256	18	-4.34783	0.00169256	Antisense	Direct
C01G5.2	chrIV	-	6526709	6529786	8.17e-09	67	-4.16667	8.17e-09	Antisense	Direct
C04G6.3	chrII	-	5083835	5091674	1.37e-05	38	-4.16667	1.37e-05	Antisense
C05C8.4	chrV	-	7226359	7230830	3.6e-08	60	-4.16667	3.6e-08	Antisense
C10F3.1	chrV	+	5996339	5999266	7.48e-06	38	-4.16667	7.48e-06	Antisense
C25H3.8	chrII	-	5669747	5678212	0.000466911	25	-4.16667	0.000466911	Antisense
C26E6.4	chrIII	+	4939528	4944366	7.48e-06	38	-4.16667	7.48e-06	Antisense
C26E6.9	chrIII	-	4922408	4930167	8.87e-12	91	-4.16667	0.00522624	Antisense
C27B7.5	chrIV	+	8901626	8903154	0.000937904	21	-4.16667	0.000937904	Antisense
C43E11.10	chrI	-	4268071	4270288	0.00131377	21	-4.16667	0.00131377	Antisense
C46C2.1	chrIV	+	9200093	9212200	4.9e-09	64	-4.16667	0.0199812	Antisense	Direct
C54G10.3	chrV	+	14647176	14653449	0.000937904	21	-4.16667	0.000937904	Antisense	Direct
CC8.2	chrIV	-	3645576	3648679	1.37e-05	38	-4.16667	0.0144936	Antisense
F01G10.1	chrIV	+	10243586	10245624	2.77e-11	82	-4.16667	2.77e-11	Antisense	Direct
F10C5.1	chrIII	+	475452	482305	0.00285198	17	-4.16667	0.00285198	Antisense
F13B10.2	chrIII	+	3867829	3869524	0.000937904	21	-4.16667	0.00304424	Antisense	Direct
F22D6.3	chrI	-	7088020	7090063	0.0109925	13	-4.16667	0.0358551	Antisense
F23B12.8	chrV	-	14453379	14456693	9.66e-08	56	-4.16667	9.66e-08	Antisense	Direct
F25D1.1	chrV	-	10532867	10536206	0.00375542	17	-4.16667	0.0340037	Antisense
F25D7.4	chrI	-	10418219	10422467	8.28e-09	65	-4.16667	0.0128632	Antisense	Direct
F31E3.4	chrIII	-	6963558	6968050	1.85e-06	46	-4.16667	1.85e-06	Antisense
F32D1.1	chrV	-	4341424	4346036	2.6e-07	52	-4.16667	2.6e-07	Antisense	Direct
F32E10.4	chrIV	-	7559774	7561644	0.000466911	25	-4.16667	0.000466911	Antisense
F36H2.1	chrI	-	9234165	9245916	0.0109925	13	-4.16667	0.0286777	Antisense
F38A5.13	chrIV	+	6585854	6588168	0.00285198	17	-4.16667	0.00285198	Antisense
F40F11.2	chrIV	+	11594294	11601648	6.59e-08	55	-4.16667	0.00807311	Antisense
F43G6.3	chrII	+	11783124	11783982	0.00888238	13	-4.16667	0.00888238	Antisense
F44B9.6	chrIII	-	8016576	8020802	0.00375542	17	-4.16667	0.00375542	Antisense	Direct
F45E12.1	chrII	+	7311455	7313727	0.00888238	13	-4.16667	0.00888238	Antisense
F53A3.4	chrIII	+	1931971	1939557	0.00888238	13	-4.16667	0.00522624	Antisense	Direct
F54B3.1	chrII	+	10251573	10268089	2.58e-06	42	-4.16667	0.00200955	Antisense
F54F2.5	chrIII	-	8786998	8792245	0.0109925	13	-4.16667	0.0264251	Antisense
F55A11.7	chrV	-	11784555	11787420	0.0109925	13	-4.16667	0.0109925	Antisense
F55A12.8	chrI	-	5349655	5353770	3.74e-05	34	-4.16667	3.74e-05	Antisense
F55G1.4	chrIV	+	7478435	7485503	5.41e-07	47	-4.16667	5.41e-07	Antisense
F56D1.2	chrII	+	5474345	5478487	0.00888238	13	-4.16667	0.00888238	Antisense
F59A6.5	chrII	+	4999509	5003779	3.97e-08	56	-4.16667	3.97e-08	Antisense
K01C8.10	chrII	+	8283599	8285413	0.00285198	17	-4.16667	0.00285198	Antisense
K02F3.12	chrIII	+	856626	860036	0.00888238	13	-4.16667	0.00391952	Antisense
K05C4.5	chrI	+	14742751	14747777	4.49e-06	39	-4.16667	4.49e-06	Antisense
K07F5.13	chrIV	+	9858458	9861718	0.00018781	26	-4.16667	9.45e-15	Antisense
K07H8.1	chrIV	+	8294671	8299750	0.000937904	21	-4.16667	0.000937904	Antisense
K09B11.9	chrIV	-	13445999	13454766	3.74e-05	34	-4.16667	0.00018125	Antisense	Direct
K09H9.2	chrI	+	3148017	3150305	0.00888238	13	-4.16667	0.00888238	Antisense
K11D12.2	chrV	+	5050159	5051788	0.000313384	25	-4.16667	0.000313384	Antisense
K11D2.3	chrI	+	12508437	12513394	0.00285198	17	-4.16667	0.000313384	Antisense
M03F8.3	chrV	+	5940006	5943344	0.00285198	17	-4.16667	3.59e-09	Antisense
R148.3	chrIII	+	3175327	3183596	4.49e-06	39	-4.16667	0.00113842	Antisense	Direct
T01G9.4	chrI	-	8291280	8293632	0.00375542	17	-4.16667	0.00375542	Antisense
T04C9.1	chrIII	+	5993176	6006290	8.96e-07	46	-4.16667	0.00501518	Antisense	Direct
T05G5.7	chrIII	+	9758806	9760289	6.37e-05	30	-4.16667	6.37e-05	Antisense	Direct
T06A10.1	chrIV	-	16855006	16863402	5.85e-08	59	-4.16667	5.85e-08	Antisense
T19A5.2	chrV	+	8947774	8955477	0.00018781	26	-4.16667	8.51e-05	Antisense
T23G5.6	chrIII	+	9240276	9242404	6.37e-05	30	-4.16667	6.37e-05	Antisense	Direct
T26A8.4	chrIV	-	8429401	8431472	0.0109925	13	-4.16667	0.0109925	Antisense
W01B11.3	chrI	+	3267094	3269120	4.49e-06	39	-4.16667	4.49e-06	Antisense
W02A11.1	chrI	-	12730011	12732694	0.000466911	25	-4.16667	0.000466911	Antisense
W03F9.10	chrV	+	128236	131739	0.00888238	13	-4.16667	0.00888238	Antisense	Direct
W03G9.4	chrI	-	4964894	4967071	0.000466911	25	-4.16667	0.000466911	Antisense	Direct
W07E6.4	chrII	+	484864	490402	2.18e-05	34	-4.16667	2.18e-05	Antisense
W08F4.3	chrII	+	580618	581834	0.00888238	13	-4.16667	0.00888238	Antisense
Y111B2A.14	chrIII	+	12626454	12651111	4.49e-06	39	-4.16667	4.49e-06	Antisense	Direct
Y37A1C.1	chrIV	-	14110422	14116002	5.85e-08	59	-4.16667	0.0065968	Antisense
Y37D8A.13	chrIII	-	12880917	12891618	0.0109925	13	-4.16667	0.0109925	Antisense	Direct
Y43F4B.6	chrIII	-	13302900	13307072	6.1e-15	120	-4.16667	6.1e-15	Antisense
Y46E12BL.2	chrII	+	15233054	15244833	2.58e-06	42	-4.16667	2.58e-06	Antisense	Direct
Y46G5A.1	chrII	+	12694319	12725391	6.37e-05	30	-4.16667	0.0172552	Antisense
Y47D3A.23	chrIII	-	11279635	11290462	0.0109925	13	-4.16667	0.00787011	Antisense	Direct
Y47G6A.12	chrI	-	3433157	3438544	1.14e-06	47	-4.16667	1.14e-06	Antisense
Y48G9A.4	chrIII	+	2134462	2151527	3.67e-10	73	-4.16667	3.67e-10	Antisense	Direct
Y54E10A.9	chrI	-	3158514	3162372	9.66e-08	56	-4.16667	8.32e-05	Antisense	Direct
Y55B1AL.3	chrIII	-	577843	587102	0.000466911	25	-4.16667	0.0358551	Antisense
Y57G11C.11	chrIV	-	14793170	14796285	3.09e-06	43	-4.16667	0.00986752	Antisense	Direct
Y73F8A.24	chrIV	-	15445340	15453148	0.0109925	13	-4.16667	0.0109925	Antisense
Y79H2A.11	chrIII	+	12061619	12072157	2.18e-05	34	-4.16667	2.18e-05	Antisense	Direct
Y79H2A.3	chrIII	-	12031403	12040700	0.00375542	17	-4.16667	2.18e-05	Antisense
ZK675.1	chrII	+	7893159	7900415	0.000313384	25	-4.16667	0.0199812	Antisense
ZK792.6	chrIV	-	11688196	11691058	0.000466911	25	-4.16667	0.000466911	Antisense
B0238.11	chrV	+	5269468	5270717	0.00476166	16	-4	0.00476166	Antisense
B0464.6	chrIII	-	9463021	9465371	0.018113	12	-4	0.018113	Antisense
C06A5.6	chrI	-	5983231	5985871	6.62e-07	52	-4	6.62e-07	Antisense
C08F8.2	chrIV	+	11149600	11154308	0.0149266	12	-4	0.000505578	Antisense
C08H9.3	chrII	-	9882662	9886364	0.018113	12	-4	0.0028771	Antisense	Direct
C16C10.11	chrIII	+	4152029	4152658	0.000175147	28	-4	0.000175147	Antisense	Direct
C16C10.3	chrIII	-	4172306	4176132	8.23e-16	136	-4	8.23e-16	Antisense	Direct
C17E4.3	chrI	-	9416891	9418865	0.00614741	16	-4	0.00614741	Antisense
C26C6.1	chrI	+	7495432	7503573	0.000519434	24	-4	0.000466911	Antisense	Direct
C27H6.4	chrV	-	9983894	9985711	0.018113	12	-4	0.0167012	Antisense
C28H8.4	chrIII	+	5906999	5908374	0.000519434	24	-4	0.000519434	Antisense	Direct
C44E4.1	chrI	-	4610268	4622973	0.00614741	16	-4	0.00340464	Antisense
C47B2.3	chrI	-	12964801	12966251	2.54e-14	119	-4	2.54e-14	Antisense
C49H3.5	chrIV	+	7910582	7915157	0.000519434	24	-4	2.16e-08	Antisense
C50F2.3	chrI	+	3877064	3880749	0.00155927	20	-4	0.00155927	Antisense
F08G5.1	chrIV	+	12408862	12410437	0.00476166	16	-4	0.00476166	Antisense
F10G7.1	chrII	+	4710281	4713501	8.46e-07	48	-4	8.46e-07	Antisense	Direct
F14B4.3	chrI	-	9280969	9286553	1.11e-06	49	-4	1.11e-06	Antisense
F19B6.1	chrIV	-	12329376	12334570	0.00214129	20	-4	0.0247649	Antisense
F22B5.1	chrII	+	8444237	8445036	0.0149266	12	-4	0.0149266	Antisense	Direct
F25H2.6	chrI	+	10554625	10557620	0.0489496	8	-4	0.0489496	Antisense
F28C6.6	chrII	+	8603791	8606476	0.00155927	20	-4	0.00155927	Antisense
F33H2.1	chrI	-	15017265	15022967	0.00027206	28	-4	0.00027206	Antisense	Direct
F36A2.1	chrI	-	8804794	8808041	0.018113	12	-4	5.97e-07	Antisense	Direct
F36H1.2	chrIV	+	11038631	11047383	0.0489496	8	-4	0.0480708	Antisense
F39B2.11	chrI	-	14755138	14756413	0.00214129	20	-4	0.00214129	Antisense
F42C5.8	chrIV	-	7313027	7313843	0.018113	12	-4	0.018113	Antisense	Direct
F45E12.3	chrII	+	7302040	7305688	0.0489496	8	-4	0.0489496	Antisense	Direct
F46E10.10	chrV	-	6515402	6516509	0.00027206	28	-4	0.0198035	Antisense
F48E8.6	chrIII	+	5443263	5446453	5.31e-12	93	-4	5.31e-12	Antisense
F54D5.14	chrII	+	11578629	11582675	7.73e-09	65	-4	7.73e-09	Antisense
F55A3.1	chrI	+	10799611	10806890	0.0149266	12	-4	0.0149266	Antisense
F56D2.7	chrIII	+	5595725	5598019	0.0489496	8	-4	0.0489496	Antisense
F57C9.5	chrI	+	4827072	4829769	8.46e-07	48	-4	8.46e-07	Antisense	Direct
F58E10.4	chrV	+	14012310	14013622	0.00155927	20	-4	0.00155927	Antisense
F58G11.1	chrV	+	13661242	13664215	0.000175147	28	-4	7.29e-27	Antisense
H15N14.2	chrI	-	7766531	7772225	6.08e-05	33	-4	0.00141091	Antisense
H26D21.2	chrI	-	3694310	3697551	0.00614741	16	-4	0.00614741	Antisense
K01C8.9	chrII	-	8280770	8283140	0.00614741	16	-4	0.00614741	Antisense
K02B2.1	chrIV	+	5941909	5943976	0.0149266	12	-4	0.0149266	Antisense
K03B4.3	chrV	+	4687094	4688776	0.000519434	24	-4	0.0472597	Antisense
K08E7.3	chrIV	+	12567825	12570575	1.96e-10	80	-4	1.96e-10	Antisense	Direct
K11H12.2	chrIV	-	653537	654571	0.000758671	24	-4	0.000758671	Antisense	Direct
M01E11.6	chrI	-	5577057	5579302	3.64e-28	253	-4	3.64e-28	Antisense	Direct
M04B2.1	chrIV	+	11524612	11527927	0.018113	12	-4	3.6e-14	Sense	Direct
M18.5	chrIV	-	12114779	12121135	0.00614741	16	-4	0.00614741	Antisense
M57.2	chrIV	+	3527354	3532263	0.0489496	8	-4	0.0489496	Antisense
PAR2.4	chrIII	-	8763197	8767249	0.00027206	28	-4	0.000194362	Antisense
R08D7.1	chrIII	-	8965953	8967637	0.018113	12	-4	0.018113	Antisense
R09B3.4	chrI	+	11911313	11912036	0.00155927	20	-4	0.00155927	Antisense	Direct
R10E11.3	chrIII	+	9776430	9778748	0.0489496	8	-4	2.39e-08	Antisense
R12E2.2	chrI	+	4178812	4182159	0.0489496	8	-4	0.0489496	Antisense	Direct
T13F2.3	chrIV	-	9791917	9796563	9.48e-08	58	-4	0.000484697	Antisense
T21C9.2	chrV	-	10566367	10576391	0.00214129	20	-4	0.00214129	Antisense
T21E3.1	chrI	+	3932211	3934792	0.00476166	16	-4	0.00476166	Antisense
T23F6.4	chrIV	+	12724959	12729943	0.0149266	12	-4	0.0149266	Antisense
T23H2.3	chrI	-	6441634	6446466	0.00614741	16	-4	0.00614741	Antisense
T24D1.2	chrI	-	9953551	9955823	0.00614741	16	-4	0.00614741	Antisense
T27F2.1	chrV	+	11645475	11649952	0.0149266	12	-4	0.0149266	Antisense
W02A2.7	chrIV	+	13353690	13356072	1.24e-05	37	-4	1.24e-05	Antisense	Direct
W03F8.4	chrIV	+	5184112	5185222	0.00476166	16	-4	0.00476166	Antisense
W06H8.1	chrV	+	6208822	6217631	0.00155927	20	-4	0.000686344	Antisense
W09G10.4	chrII	-	3532595	3546425	0.00214129	20	-4	0.0334882	Antisense	Direct
Y113G7B.18	chrV	-	20247356	20262617	0.00614741	16	-4	0.00614741	Antisense	Direct
Y17G9B.9	chrIV	-	4758970	4760419	4.11e-07	53	-4	4.11e-07	Antisense	Direct
Y18D10A.19	chrI	+	12918714	12919094	5.15e-07	49	-4	5.15e-07	Antisense	Direct
Y37E11AM.1	chrIV	+	3726414	3735490	0.0149266	12	-4	0.0149266	Antisense
Y37E11B.5	chrIV	-	3593964	3598547	0.00614741	16	-4	0.00614741	Antisense
Y39A1A.14	chrIII	+	10649400	10650497	0.0149266	12	-4	0.0149266	Antisense
Y39A1A.6	chrIII	+	10615347	10617705	0.0489496	8	-4	0.0489496	Antisense
Y41E3.10	chrIV	+	15037291	15039473	5.96e-05	32	-4	0.0311497	Antisense
Y43F4B.4	chrIII	+	13296732	13298817	0.00476166	16	-4	0.00476166	Antisense
Y46G5A.5	chrII	-	12736956	12738240	2.29e-19	167	-4	2.29e-19	Antisense	Direct
Y47D3A.29	chrIII	+	11142329	11154033	5.96e-05	32	-4	5.96e-05	Antisense	Direct
Y47G6A.10	chrI	+	3467132	3477972	0.0149266	12	-4	0.0149266	Antisense
Y47G6A.2	chrI	+	3608617	3611705	0.0489496	8	-4	0.0489496	Antisense
Y48C3A.7	chrII	-	13311386	13320819	4.84e-06	44	-4	4.84e-06	Antisense
Y48E1C.1	chrII	+	13414936	13424352	0.0489496	8	-4	0.000111308	Antisense
Y48G9A.8	chrIII	+	2102282	2107458	0.00476166	16	-4	0.00476166	Antisense	Direct
Y49E10.14	chrIII	+	12426772	12428967	0.0489496	8	-4	0.0489496	Antisense
Y51H4A.15	chrIV	+	16656276	16657317	0.0489496	8	-4	0.000481	Antisense
Y53F4B.22	chrII	+	15120202	15123247	0.000175147	28	-4	0.000175147	Antisense
Y54E2A.11	chrII	+	14795311	14798345	2.44e-06	44	-4	0.0358551	Antisense	Direct
Y54E2A.12	chrII	+	14798373	14800807	0.00476166	16	-4	0.00476166	Antisense	Direct
Y54F10AM.5	chrIII	+	2529050	2530491	0.0489496	8	-4	0.0489496	Antisense
Y57G11C.33	chrIV	+	14657044	14658071	0.0489496	8	-4	0.0489496	Antisense	Direct
Y66D12A.8	chrIII	+	11574102	11578601	0.0489496	8	-4	0.0489496	Antisense
Y66H1A.4	chrIV	+	426169	426952	0.0489496	8	-4	0.0489496	Antisense
Y66H1B.2	chrIV	-	359238	364340	0.000758671	24	-4	0.0489496	Antisense	Direct
Y71F9B.3	chrI	+	2730010	2731246	0.00155927	20	-4	0.00155927	Antisense
Y71G12B.12	chrI	+	1709587	1715569	0.0149266	12	-4	3.21e-05	Antisense
Y75B8A.24	chrIII	-	12251371	12273560	1.31e-05	40	-4	1.31e-05	Antisense
Y80D3A.2	chrV	-	18860713	18894932	0.00614741	16	-4	0.00614741	Antisense
ZK1127.5	chrII	+	7050610	7051928	0.0489496	8	-4	0.0489496	Antisense
ZK1251.9	chrIV	-	9696965	9706695	0.000758671	24	-4	0.000758671	Antisense
B0348.6	chrV	-	6588	7822	0.000158426	31	-3.84615	0.000387929	Antisense
C09H10.7	chrII	+	11108147	11109507	9.78e-05	31	-3.84615	9.78e-05	Antisense
C32E8.8	chrI	-	3789320	3792799	2.11e-05	39	-3.84615	2.11e-05	Antisense
F15B9.4	chrV	+	13002321	13006969	8.2e-21	178	-3.84615	8.2e-21	Antisense	Direct
F15E6.1	chrIV	+	4307751	4316759	1.33e-11	93	-3.84615	1.33e-11	Antisense	Direct
F26H11.2	chrII	+	14390302	14407807	7.29e-09	67	-3.84615	0.0330023	Antisense
K09H11.3	chrV	+	5717888	5722064	1.95e-23	198	-3.84615	1.95e-23	Antisense	Direct
R07G3.3	chrII	+	7599587	7607945	9.78e-05	31	-3.84615	0.0264251	Antisense
T12E12.2	chrIV	+	5544846	5548436	1.06e-10	85	-3.84615	1.06e-10	Antisense
T14G10.2	chrIV	-	10164351	10174301	2.11e-05	39	-3.84615	0.0050045	Antisense
T19B4.2	chrI	+	5692268	5696691	3.35e-05	35	-3.84615	3.35e-05	Antisense	Direct
Y111B2A.3	chrIII	+	12496423	12498902	1.48e-18	156	-3.84615	1.48e-18	Antisense	Direct
Y18D10A.13	chrI	+	12878583	12902770	1.15e-05	39	-3.84615	1.15e-05	Antisense	Direct
Y37A1B.1	chrIV	+	14071515	14076711	2.07e-08	63	-3.84615	0.0199812	Antisense	Direct
Y39G10AR.13	chrI	-	2304716	2306787	9.71e-18	159	-3.84615	9.71e-18	Antisense	Direct
Y45G5AM.8	chrV	-	4170105	4175611	0.000158426	31	-3.84615	0.000158426	Antisense
Y53F4B.9	chrII	-	15004770	15010318	1.46e-18	165	-3.84615	1.46e-18	Antisense	Direct
Y57A10A.31	chrII	+	12289319	12298999	9.78e-05	31	-3.84615	9.78e-05	Antisense
ZC155.3	chrIII	-	5203671	5206870	6.36e-14	119	-3.84615	6.36e-14	Antisense
ZK381.1	chrIV	+	6977502	6978927	0.000287849	27	-3.84615	0.000287849	Antisense
ZK637.7	chrIII	-	8900143	8904038	0.000158426	31	-3.84615	0.0172552	Antisense
B0041.7	chrI	-	4665744	4671739	0.00996251	15	-3.7037	0.00996251	Antisense
B0207.4	chrI	+	5937478	5938883	0.00015969	30	-3.7037	0.00015969	Antisense
B0336.1	chrIII	+	5722799	5727065	1.93e-08	65	-3.7037	1.93e-08	Antisense
B0491.1	chrII	+	11348346	11349863	0.00257068	19	-3.7037	0.00257068	Antisense
C06A1.1	chrII	-	10560253	10563311	2.22e-07	60	-3.7037	2.22e-07	Antisense	Direct
C06E1.10	chrIII	-	8609971	8614464	0.00346112	19	-3.7037	0.00346112	Antisense
C06G4.1	chrIII	+	7987057	7990478	5.47e-05	34	-3.7037	5.47e-05	Antisense
C09H10.10	chrII	-	11095855	11096399	0.00996251	15	-3.7037	0.00996251	Antisense
C14B1.9	chrIII	-	3724199	3726479	0.00996251	15	-3.7037	0.00996251	Antisense
C14B9.4	chrIII	+	8101273	8104002	9.69e-20	171	-3.7037	0.00996251	Antisense	Direct
C18E9.3	chrII	-	8966840	8969393	0.000701537	26	-3.7037	0.00554426	Antisense	Direct
C27H6.2	chrV	-	9978765	9980741	0.000253485	30	-3.7037	0.000253485	Antisense
C35D10.9	chrIII	+	4852287	4855129	0.00257068	19	-3.7037	0.000109621	Antisense
C37A2.2	chrI	+	6791025	6797471	0.00787011	15	-3.7037	0.00787011	Antisense	Direct
C47E8.5	chrV	+	14686141	14688403	1.1e-08	68	-3.7037	1.1e-08	Antisense	Direct
C50F2.2	chrI	+	3881829	3888315	8.9e-08	60	-3.7037	8.9e-08	Antisense	Direct
D1014.8	chrV	-	8126708	8129332	0.00346112	19	-3.7037	0.00346112	Antisense
D2005.4	chrI	+	7815261	7820231	4.47e-07	53	-3.7037	4.47e-07	Antisense	Direct
D2030.6	chrI	-	7585508	7588356	6.29e-21	194	-3.7037	6.29e-21	Antisense	Direct
F21H12.5	chrII	-	6088830	6091438	9.23e-05	34	-3.7037	9.23e-05	Antisense
F22B3.4	chrIV	+	11410455	11412972	1.1e-08	68	-3.7037	1.1e-08	Antisense
F36A4.7	chrIV	+	4248062	4258156	5.82e-25	224	-3.7037	5.82e-25	Antisense	Direct
F54C9.1	chrII	-	8559320	8561283	0.00996251	15	-3.7037	0.00122521	Antisense	Direct
F55F8.3	chrI	-	5649758	5653642	0.00122401	23	-3.7037	0.00122401	Antisense
F57B10.7	chrI	+	6554729	6558595	0.00787011	15	-3.7037	0.00787011	Antisense
F58G11.5	chrV	-	13676095	13678563	0.000701537	26	-3.7037	0.000701537	Antisense
H20J04.2	chrII	+	4340145	4350979	0.00787011	15	-3.7037	0.00787011	Antisense
K01G5.7	chrIII	-	10740862	10742307	7.54e-12	103	-3.7037	7.54e-12	Antisense	Direct
K12D12.1	chrII	+	11875072	11880504	3.01e-15	129	-3.7037	3.01e-15	Antisense	Direct
M01E5.4	chrI	-	13287508	13289528	0.00122401	23	-3.7037	0.00122401	Antisense
R02F2.1	chrIII	+	5501818	5506354	0.00257068	19	-3.7037	0.0334882	Antisense	Direct
R11A8.6	chrIV	+	10368578	10372600	0.00257068	19	-3.7037	0.00257068	Antisense	Direct
T02E1.3	chrI	+	8214402	8217978	0.00257068	19	-3.7037	0.00798749	Antisense	Direct
T09A12.4	chrIV	-	8226314	8231817	0.00122401	23	-3.7037	0.0317484	Antisense
T09A5.10	chrII	+	7860589	7863356	1.37e-09	76	-3.7037	1.37e-09	Antisense	Direct
T12E12.3	chrIV	+	5541619	5544720	7.64e-30	268	-3.7037	7.64e-30	Antisense	Direct
T20D3.11	chrIV	-	9343334	9355962	4.38e-09	76	-3.7037	4.38e-09	Antisense
T24D1.3	chrI	-	9958773	9960144	0.000701537	26	-3.7037	0.000701537	Antisense
VF13D12L.1	chrII	-	11698331	11700178	6.94e-09	75	-3.7037	6.94e-09	Antisense
W01G7.4	chrII	+	14060641	14062527	0.00787011	15	-3.7037	0.00787011	Antisense
W03G9.2	chrI	+	4962452	4964239	0.00787011	15	-3.7037	0.00787011	Antisense
W07E6.2	chrII	-	480726	484385	0.00346112	19	-3.7037	0.00346112	Antisense
Y17G7A.1	chrII	+	11916429	11917427	1.36e-14	124	-3.7037	1.36e-14	Antisense	Direct
Y18D10A.11	chrI	-	12861960	12863521	3.38e-05	38	-3.7037	3.38e-05	Antisense
Y37D8A.21	chrIII	-	12927936	12931741	0.00122401	23	-3.7037	0.00122401	Antisense
Y45G5AM.2	chrV	+	4175872	4181646	2.4e-09	73	-3.7037	2.4e-09	Antisense	Direct
Y46G5A.4	chrII	-	12726866	12736783	5.39e-30	289	-3.7037	5.39e-30	Antisense	Direct
Y47D3A.15	chrIII	+	11237032	11237969	0.00787011	15	-3.7037	0.00787011	Antisense	Direct
Y73B6BL.2	chrIV	+	6419490	6420883	0.00787011	15	-3.7037	0.00787011	Antisense
ZC404.9	chrV	-	6788432	6792648	0.000253485	30	-3.7037	0.000253485	Antisense
ZK686.2	chrIII	-	7763628	7765980	0.00996251	15	-3.7037	0.00996251	Antisense
ZK856.12	chrV	+	10212918	10216275	0.00015969	30	-3.7037	0.00015969	Antisense
AH6.5	chrII	+	9524095	9526288	0.00419984	18	-3.57143	0.00419984	Antisense	Direct
B0238.9	chrV	-	5275550	5278085	0.00554426	18	-3.57143	0.00554426	Antisense
BE0003N10.2	chrIII	-	1031336	1037200	0.0294698	11	-3.57143	0.0294698	Antisense
C05C10.6	chrII	+	9940682	9943918	0.00419984	18	-3.57143	1.47e-05	Antisense
C10C5.1	chrIV	-	9359417	9366431	4.7e-11	99	-3.57143	4.7e-11	Antisense
C16A11.4	chrII	+	4227039	4229126	1.35e-12	107	-3.57143	5.85e-05	Antisense	Direct
C18A3.5	chrII	-	5712808	5714792	0.00554426	18	-3.57143	0.00798749	Antisense
C23G10.3	chrIII	+	6206768	6207874	0.0247649	11	-3.57143	0.0247649	Antisense	Direct
C27D9.1	chrII	+	4753442	4755581	4.79e-11	94	-3.57143	4.79e-11	Antisense	Direct
C45G3.1	chrI	-	9221835	9226378	7.23e-08	68	-3.57143	7.23e-08	Antisense
C47B2.2	chrI	-	12961842	12964558	0.0294698	11	-3.57143	0.00956362	Antisense
C53D5.6	chrI	-	310981	314990	1.16e-05	44	-3.57143	1.16e-05	Antisense	Direct
D1081.8	chrI	+	8491283	8495831	0.0247649	11	-3.57143	0.0247649	Antisense
F08F8.2	chrIII	+	7359422	7362026	8.87e-05	33	-3.57143	8.87e-05	Antisense
F10G7.4	chrII	+	4698708	4700978	4.93e-21	192	-3.57143	4.93e-21	Antisense	Direct
F11E6.7	chrIV	-	17457786	17461234	3.13e-05	40	-3.57143	3.13e-05	Antisense
F18E9.5	chrX	+	8570989	8575383	0.0247649	11	-3.57143	4.62e-06	Antisense	Direct
F21C3.4	chrI	-	7280549	7282869	0.0294698	11	-3.57143	0.00266517	Antisense
F25H2.10	chrI	+	10567922	10568952	0.0247649	11	-3.57143	0.0247649	Antisense	Direct
F26H9.1	chrI	+	9287437	9289761	0.00419984	18	-3.57143	0.00419984	Antisense	Direct
F28C6.2	chrII	+	8594279	8596037	8.87e-05	33	-3.57143	8.87e-05	Antisense	Direct
F35F11.1	chrIV	+	4042567	4047779	0.00419984	18	-3.57143	0.00419984	Antisense	Direct
F36D4.5	chrV	-	9419267	9425735	0.000403103	29	-3.57143	7.04e-25	Antisense	Direct
F44E7.4	chrV	-	5772813	5776934	2.52e-06	51	-3.57143	0.0159245	Antisense
F44G4.4	chrII	+	8997745	8999640	0.0247649	11	-3.57143	0.00692727	Antisense	Direct
F53C11.5	chrV	+	13787527	13796201	0.0247649	11	-3.57143	0.0394744	Antisense
F54C8.4	chrIII	-	9441457	9443527	1.83e-05	43	-3.57143	1.83e-05	Antisense	Direct
F56C9.1	chrIII	+	7336513	7343559	4.93e-05	36	-3.57143	4.93e-05	Antisense	Direct
F57C9.7	chrI	-	4825169	4826634	0.000146769	33	-3.57143	0.000146769	Antisense
F58D5.1	chrI	-	12060827	12064877	0.00554426	18	-3.57143	0.00554426	Antisense
F59C6.4	chrI	+	10518369	10519150	0.0247649	11	-3.57143	0.0247649	Antisense
H21P03.2	chrIV	+	11480823	11482384	0.0247649	11	-3.57143	0.0247649	Antisense
K02F3.1	chrIII	+	854206	856519	0.0247649	11	-3.57143	0.0247649	Antisense
K04C2.4	chrIII	-	6885212	6889432	0.0294698	11	-3.57143	0.0294698	Antisense
K10B3.5	chrX	-	3103241	3106271	0.0294698	11	-3.57143	0.0294698	Antisense
M02B7.5	chrIV	-	3807660	3819318	1.16e-05	44	-3.57143	1.16e-05	Antisense
M03D4.1	chrIV	+	6118207	6121754	3.59e-09	74	-3.57143	0.0138018	Antisense
R07H5.2	chrIV	+	11179614	11182972	0.00419984	18	-3.57143	0.00340464	Antisense	Direct
R119.4	chrI	-	373573	381905	3.13e-05	40	-3.57143	3.13e-05	Antisense	Direct
R11A8.7	chrIV	+	10374959	10387268	3.28e-09	76	-3.57143	0.00257068	Antisense
R12B2.5	chrIII	-	5828507	5833697	1.22e-07	65	-3.57143	0.0286777	Antisense
R13F6.10	chrIII	-	6865158	6869359	0.0294698	11	-3.57143	0.0294698	Antisense
T01D1.2	chrII	+	162373	170628	0.0247649	11	-3.57143	0.0106964	Antisense
T05H10.1	chrII	+	8042518	8047379	8.87e-05	33	-3.57143	8.87e-05	Antisense
T06E4.1	chrV	+	9645812	9650270	5.94e-06	44	-3.57143	5.94e-06	Antisense
T06E4.3	chrV	-	9634833	9645475	2.52e-06	51	-3.57143	5.94e-06	Antisense	Direct
T12E12.1	chrIV	+	5551120	5558808	0.0247649	11	-3.57143	0.0247649	Antisense
T14G10.5	chrIV	+	10151919	10155608	8.87e-05	33	-3.57143	2.11e-05	Antisense
T18H9.7	chrV	-	9213729	9217216	8.51e-05	36	-3.57143	0.00668401	Antisense
T21E12.4	chrI	+	4386787	4401981	1.59e-13	117	-3.57143	1.59e-13	Antisense	Direct
T22H9.2	chrV	+	348789	358836	0.0247649	11	-3.57143	0.0140946	Antisense	Direct
T27F6.4	chrI	+	12484169	12486450	5.67e-14	121	-3.57143	5.67e-14	Antisense	Direct
W02B8.2	chrII	+	13908828	13915095	0.0247649	11	-3.57143	0.0247649	Antisense
W09C5.2	chrI	+	13629214	13633482	0.0247649	11	-3.57143	0.0247649	Antisense
Y104H12D.3	chrIV	+	1193075	1201846	0.0247649	11	-3.57143	0.0247649	Antisense	Direct
Y14H12B.2	chrII	-	3932170	3933733	4.36e-15	140	-3.57143	4.36e-15	Antisense	Direct
Y18D10A.25	chrI	+	12916429	12918052	0.00139604	22	-3.57143	0.00139604	Antisense	Direct
Y38F2AR.2	chrIV	+	2389456	2390122	0.0247649	11	-3.57143	0.0247649	Antisense
Y45F10D.3	chrIV	+	13778833	13782329	0.00419984	18	-3.57143	0.0288032	Antisense
Y48C3A.17	chrII	+	13406067	13411188	0.0247649	11	-3.57143	2.37e-05	Antisense
Y48G1BM.5	chrI	-	229089	234973	0.0294698	11	-3.57143	0.0294698	Antisense
Y54G11A.14	chrII	+	14318059	14320819	0.00419984	18	-3.57143	0.00419984	Antisense	Direct
Y55F3AM.13	chrIV	-	1055022	1056313	0.00554426	18	-3.57143	0.00554426	Antisense
Y67D8C.6	chrIV	-	3062519	3063362	0.0294698	11	-3.57143	0.0294698	Antisense	Direct
Y67H2A.4	chrIV	+	13297878	13300036	0.0247649	11	-3.57143	1.11e-05	Antisense	Direct
Y73E7A.6	chrI	-	1607705	1610037	0.0294698	11	-3.57143	0.0294698	Antisense
B0523.5	chrIII	-	8675229	8683982	3.01e-07	63	-3.44828	3.01e-07	Antisense
B0564.7	chrIV	+	13100683	13104610	0.0128632	14	-3.44828	0.0128632	Antisense
C06G3.2	chrIV	+	7040194	7043678	1.56e-11	100	-3.44828	1.56e-11	Antisense	Direct
C08B11.3	chrII	-	8022564	8027687	3.97e-06	50	-3.44828	3.97e-06	Antisense
C12C8.3	chrI	-	9335955	9342487	0.0031124	21	-3.44828	1.4e-06	Antisense
C18E9.6	chrII	-	8971905	8973485	0.0159673	14	-3.44828	0.0159673	Antisense
C32F10.5	chrI	-	5815675	5818128	0.0159673	14	-3.44828	0.0159673	Antisense
C37H5.5	chrV	+	4827350	4835920	0.00226127	21	-3.44828	0.00226127	Antisense	Direct
C41D11.4	chrI	-	4441646	4444106	0.0159673	14	-3.44828	0.0159673	Antisense
F10B5.6	chrII	-	8159858	8162099	0.000636899	28	-3.44828	0.000636899	Antisense	Direct
F18C5.3	chrII	+	6546798	6554795	0.0128632	14	-3.44828	0.0128632	Antisense
F25D7.2	chrI	+	10401056	10402930	0.0128632	14	-3.44828	0.0128632	Antisense
F25H2.11	chrI	+	10569122	10569923	0.000761864	25	-3.44828	0.000761864	Antisense
F37A4.8	chrIII	-	6703932	6709995	0.0031124	21	-3.44828	0.0031124	Antisense
F38A5.2	chrIV	-	6582686	6585384	1.07e-05	46	-3.44828	0.0065968	Antisense	Direct
F40F9.6	chrV	-	9725917	9729481	0.0159673	14	-3.44828	0.0090873	Antisense
F43G6.1	chrII	+	11778066	11782141	2.75e-05	39	-3.44828	6.49e-07	Antisense	Direct
F44B9.7	chrIII	-	8025138	8027971	0.001115	25	-3.44828	0.001115	Antisense
F52C12.1	chrIV	+	1959852	1963223	0.00226127	21	-3.44828	0.00226127	Antisense
F53G12.1	chrI	-	108681	110057	0.000636899	28	-3.44828	0.000636899	Antisense
F54C9.8	chrII	+	8575471	8577653	0.000761864	25	-3.44828	0.000761864	Antisense
F55H2.6	chrIII	-	9517192	9521361	0.000133994	35	-3.44828	0.000133994	Antisense
F58G11.2	chrV	+	13665382	13669266	7.93e-05	35	-3.44828	7.93e-05	Antisense
F59B2.6	chrIII	+	9002699	9004750	0.00226127	21	-3.44828	0.00226127	Antisense
F59E12.9	chrII	-	5640050	5647014	4.94e-05	39	-3.44828	4.94e-05	Antisense	Direct
H12I13.4	chrII	-	6078371	6080771	0.0031124	21	-3.44828	0.0031124	Antisense
K01G5.5	chrIII	+	10748323	10749810	0.000143133	32	-3.44828	0.000143133	Antisense
R06C7.8	chrI	+	7251938	7255223	6.23e-14	128	-3.44828	6.23e-14	Antisense	Direct
T04A8.14	chrIII	-	4715256	4720629	5.12e-07	60	-3.44828	5.12e-07	Antisense
T13H2.5	chrX	-	4596048	4605869	0.0159673	14	-3.44828	0.0167012	Antisense	Direct
T27E9.1	chrIII	+	13463041	13464531	0.000143133	32	-3.44828	0.0115902	Antisense	Direct
T27F6.6	chrI	+	12490964	12494515	0.0128632	14	-3.44828	0.0128632	Antisense
W02B12.3	chrII	+	11453895	11455723	7.93e-05	35	-3.44828	1.44e-05	Antisense	Direct
Y102E9.1b	chrIII	+	6730718	6733784	0.00226127	21	-3.44828	0.00226127	Antisense
Y116A8A.9	chrIV	-	16847787	16854902	0.0031124	21	-3.44828	0.00614741	Antisense
Y116A8C.35	chrIV	-	17116718	17118716	0.0159673	14	-3.44828	0.0159673	Antisense	Direct
Y25C1A.5	chrII	+	3078800	3087385	0.000761864	25	-3.44828	0.000761864	Antisense
Y39G10AR.8	chrI	+	2313271	2316010	0.000761864	25	-3.44828	0.000761864	Antisense
Y43B11AR.4	chrIV	-	7083718	7084645	0.000636899	28	-3.44828	0.000636899	Antisense	Direct
Y51H4A.3	chrIV	-	16482756	16488980	0.0159673	14	-3.44828	0.0159673	Antisense
Y55F3BR.8	chrIV	-	849290	854780	0.001115	25	-3.44828	0.0413091	Antisense	Direct
Y57G11C.9	chrIV	+	14787128	14790730	0.0128632	14	-3.44828	0.0489496	Antisense
Y65B4BR.4	chrI	+	537124	542202	3.34e-07	59	-3.44828	0.0334882	Antisense	Direct
Y66D12A.15	chrIII	+	11526252	11534467	0.00226127	21	-3.44828	0.00226127	Antisense	Direct
Y67D8C.5	chrIV	-	3032725	3049968	1.93e-18	185	-3.44828	1.93e-18	Antisense	Direct
Y92H12BR.3	chrI	+	1416591	1425131	0.000417484	28	-3.44828	0.00177031	Antisense
ZC308.1	chrI	+	6369966	6386145	1.87e-06	50	-3.44828	0.00217314	Antisense	Direct
ZC518.3	chrIV	+	12361537	12371816	0.00226127	21	-3.44828	2.16e-08	Antisense	Direct
ZK112.2	chrIII	+	7731314	7737999	5.06e-12	106	-3.44828	5.06e-12	Antisense
B0286.4	chrII	-	4372940	4376721	0.00879452	17	-3.33333	0.00167332	Antisense
C04A2.3	chrII	+	6834958	6847844	0.00122589	24	-3.33333	0.0315857	Antisense	Direct
C18G1.5	chrV	+	4754338	4755286	1.37e-09	85	-3.33333	1.37e-09	Antisense
C25D7.6	chrV	-	15056750	15059575	0.00175899	24	-3.33333	0.00175899	Antisense
C42D8.2	chrX	+	5101011	5106047	0.000999433	27	-3.33333	0.00668401	Sense	Direct
C55B7.11	chrI	-	6511609	6513843	0.000365039	31	-3.33333	0.000365039	Antisense
F28B3.1	chrI	+	4943630	4949329	0.00679401	17	-3.33333	0.00679401	Antisense
F29B9.2	chrIV	+	4660983	4665186	3.36e-08	71	-3.33333	1.55e-19	Antisense	Direct
F29C12.5	chrII	+	13122945	13124697	7e-05	37	-3.33333	7e-05	Antisense	Direct
F29F11.6	chrV	+	10682395	10686480	0.00679401	17	-3.33333	0.00679401	Antisense
F32D1.10	chrV	+	4347183	4349530	3.83e-09	81	-3.33333	3.83e-09	Antisense	Direct
F46F11.2	chrI	+	5619604	5620498	7e-05	37	-3.33333	7e-05	Antisense	Direct
F53F10.5	chrI	+	3818080	3821326	0.000668218	27	-3.33333	0.000668218	Antisense	Direct
F54C9.5	chrII	+	8569863	8570890	0.00679401	17	-3.33333	0.00679401	Antisense
F54D5.8	chrII	+	11545616	11547282	0.00679401	17	-3.33333	0.00679401	Antisense
F59A2.3	chrIII	+	3396575	3397435	0.000229567	31	-3.33333	0.000229567	Antisense	Direct
H04J21.3	chrIII	+	2347576	2362042	0.00122589	24	-3.33333	6.8e-08	Antisense	Direct
K04G2.6	chrI	+	8040793	8043114	0.00679401	17	-3.33333	0.00679401	Antisense
K07A12.2	chrI	-	8676658	8681312	6.9e-17	175	-3.33333	6.9e-17	Antisense	Direct
K12D12.2	chrII	-	11865603	11874609	4.49e-05	41	-3.33333	4.49e-05	Antisense
M01E11.5	chrI	-	5571958	5572920	0.00879452	17	-3.33333	0.00879452	Antisense	Direct
M4.1	chrIV	+	3213767	3217664	1.36e-05	44	-3.33333	1.36e-05	Antisense
R107.6	chrIII	+	9054961	9058536	6.31e-28	282	-3.33333	6.31e-28	Antisense	Direct
T03F1.9	chrI	-	3862776	3865940	1.25e-06	58	-3.33333	1.25e-06	Antisense
T05A6.2	chrII	+	7816439	7818193	0.00122589	24	-3.33333	0.00217314	Antisense	Direct
T05H10.5	chrII	+	8062672	8068038	1.88e-07	62	-3.33333	8.87e-05	Antisense	Direct
T12D8.1	chrIII	+	13643797	13656517	1.15e-11	106	-3.33333	1.15e-11	Antisense	Direct
T17E9.1	chrIII	+	6118570	6124011	0.00679401	17	-3.33333	0.000295182	Antisense
T23D8.4	chrI	-	9976726	9979649	0.00879452	17	-3.33333	0.00879452	Antisense
T28A8.6	chrIII	+	13499083	13501389	0.00679401	17	-3.33333	0.00679401	Antisense
Y105E8A.9	chrI	+	14406014	14417920	0.00122589	24	-3.33333	0.00122589	Antisense
Y37D8A.9	chrIII	-	12871017	12874535	0.000365039	31	-3.33333	0.00382677	Antisense
Y41E3.11	chrIV	+	15042396	15049324	0.00122589	24	-3.33333	0.00122589	Antisense	Direct
Y47A7.1	chrV	+	5204464	5213405	0.000668218	27	-3.33333	0.000668218	Antisense
Y48E1A.1	chrII	-	13670566	13694689	1.93e-06	57	-3.33333	0.0334882	Antisense	Direct
Y62E10A.14	chrIV	-	13399067	13400476	1.62e-07	68	-3.33333	1.62e-07	Antisense
Y76B12C.7	chrIV	-	2009037	2032991	0.00879452	17	-3.33333	0.00879452	Antisense
ZC376.6	chrV	+	14185762	14192106	0.00679401	17	-3.33333	0.00679401	Antisense
ZK1010.2	chrIII	-	12974950	12977742	0.00879452	17	-3.33333	0.00879452	Antisense
ZK520.4	chrIII	+	13687078	13692468	2.44e-05	41	-3.33333	0.0334882	Antisense
ZK593.5	chrIV	-	10926800	10933092	0.00879452	17	-3.33333	0.00879452	Antisense
B0025.1	chrI	+	6028489	6033366	0.0207649	13	-3.22581	0.000508985	Antisense
B0035.11	chrIV	-	11327596	11329340	0.00275299	23	-3.22581	0.00275299	Antisense
B0238.10	chrV	+	5274059	5275528	0.0404929	10	-3.22581	0.0404929	Antisense
C04G6.1	chrII	+	5104412	5108855	0.0404929	10	-3.22581	0.000935338	Antisense	Direct
C14A4.3	chrII	+	10584265	10587850	0.0207649	13	-3.22581	0.0207649	Antisense
C14A4.5	chrII	+	10592678	10593452	0.0207649	13	-3.22581	0.0207649	Antisense
C16A3.3	chrIII	+	6383493	6389343	0.000365862	30	-3.22581	0.000365862	Antisense
C26D10.2	chrII	-	8326783	8328802	5.12e-06	53	-3.22581	8.05e-06	Antisense	Direct
C29E4.2	chrIII	+	7941645	7945522	0.00195682	23	-3.22581	0.00195682	Antisense	Direct
C35A5.8	chrV	-	10522121	10525841	0.0252786	13	-3.22581	0.0252786	Antisense
C41G7.2	chrI	+	9512442	9514746	2.37e-17	170	-3.22581	2.37e-17	Antisense	Direct
C47D12.1	chrII	-	11661498	11675841	2.79e-10	104	-3.22581	0.00933153	Antisense	Direct
C47D12.2	chrII	+	11676221	11679111	0.0404929	10	-3.22581	0.0404929	Antisense
C53A5.2	chrV	-	14519530	14523155	0.0472597	10	-3.22581	0.00798749	Antisense
D1081.7	chrI	+	8487612	8490933	1.31e-07	68	-3.22581	0.0108726	Antisense	Direct
F02E9.10	chrI	-	8427197	8429825	0.0472597	10	-3.22581	0.00956362	Antisense
F10B5.8	chrII	-	8141146	8143327	0.0472597	10	-3.22581	0.0472597	Antisense
F10G7.4	chrII	+	4698708	4700978	0.0472597	10	-3.22581	4.93e-21	Sense	Direct
F25B4.4	chrV	+	5684868	5685679	0.0404929	10	-3.22581	0.0404929	Antisense
F25H5.4	chrI	+	9163645	9166690	0.00363049	20	-3.22581	0.00363049	Antisense	Direct
F28F8.5	chrV	-	15574124	15575377	0.0472597	10	-3.22581	0.0472597	Antisense
F29C12.4	chrII	+	13117390	13121993	0.0207649	13	-3.22581	0.0207649	Antisense
F32A5.1	chrII	+	7252198	7255675	0.0207649	13	-3.22581	0.000505578	Antisense
F33E2.2	chrI	-	12565792	12572790	0.0252786	13	-3.22581	0.00200955	Antisense
F42H11.2	chrI	-	9578707	9581258	0.00275299	23	-3.22581	0.00275299	Antisense
F46F11.9	chrI	-	5610381	5616405	4.04e-05	43	-3.22581	0.000271249	Antisense	Direct
F47D12.4	chrIII	+	6280327	6282361	0.00363049	20	-3.22581	0.000743088	Antisense	Direct
F47G9.1	chrV	-	11324258	11326923	0.0252786	13	-3.22581	0.0252786	Antisense
F52F12.4	chrI	+	9901268	9902870	0.0404929	10	-3.22581	0.0404929	Antisense
F55F8.2	chrI	-	5646394	5649659	0.0472597	10	-3.22581	6.86e-13	Antisense	Direct
F56C9.6	chrIII	-	7308924	7310697	0.0252786	13	-3.22581	0.0065968	Antisense	Direct
F57B9.6	chrIII	+	6929974	6931889	2.64e-07	63	-3.22581	0.00011185	Antisense	Direct
F58G11.6	chrV	+	13678856	13681524	0.0207649	13	-3.22581	0.0207649	Antisense
K02F6.7	chrII	-	2525234	2529245	0.0472597	10	-3.22581	0.0472597	Antisense
K07A1.11	chrI	-	9616515	9618098	0.0472597	10	-3.22581	0.0472597	Antisense
M04B2.1	chrIV	+	11524612	11527927	3.6e-14	138	-3.22581	3.6e-14	Antisense	Direct
M04F3.1	chrI	+	4770304	4771267	0.0207649	13	-3.22581	0.0207649	Antisense
M28.5	chrII	-	10658069	10658536	0.0252786	13	-3.22581	0.0252786	Antisense
R04E5.8	chrX	-	8801563	8806051	0.0472597	10	-3.22581	3.56e-05	Antisense
T02G5.9	chrII	-	7070329	7072354	0.0472597	10	-3.22581	0.0172552	Antisense
T07G12.6	chrIV	+	10547059	10555334	0.0207649	13	-3.22581	0.0207649	Antisense
W01B6.9	chrIV	+	10086118	10088282	0.0404929	10	-3.22581	0.0404929	Antisense
W03F9.5	chrV	+	156830	163350	0.0404929	10	-3.22581	0.0404929	Antisense	Direct
W04A8.1	chrI	-	13835278	13840034	0.00489966	20	-3.22581	0.00489966	Antisense
W04D2.4	chrV	-	12494705	12497732	0.0252786	13	-3.22581	0.0252786	Antisense
W09B6.1	chrII	+	1143913	1152703	0.0207649	13	-3.22581	0.0115902	Antisense
Y106G6H.12	chrI	-	10464314	10471047	0.0252786	13	-3.22581	0.0252786	Antisense
Y17G7B.20	chrII	-	11977693	11979774	8.8e-06	50	-3.22581	0.00692727	Antisense	Direct
Y18D10A.17	chrI	+	12904458	12906217	3.6e-14	138	-3.22581	3.6e-14	Antisense	Direct
Y22D7AL.7	chrIII	+	1576745	1580784	0.00195682	23	-3.22581	0.00195682	Antisense
Y39G10AR.12	chrI	-	2297280	2300086	0.00275299	23	-3.22581	0.0159245	Antisense
Y41E3.4	chrIV	-	15008465	15013144	0.0472597	10	-3.22581	0.0472597	Antisense
Y47G6A.9	chrI	+	3479329	3481375	0.0404929	10	-3.22581	0.0404929	Antisense
Y50D4C.5	chrV	-	998447	1003594	0.0252786	13	-3.22581	0.0252786	Antisense
Y53G8AR.2	chrIII	+	3322958	3331655	0.00363049	20	-3.22581	1.46e-18	Antisense
Y55B1BR.2	chrIII	+	434909	440135	0.0404929	10	-3.22581	0.0404929	Antisense	Direct
Y66H1B.3	chrIV	-	370362	376012	0.0252786	13	-3.22581	0.0252786	Antisense
ZC168.3	chrIV	-	10732803	10734604	0.0472597	10	-3.22581	0.0472597	Antisense
ZK20.5	chrII	+	11653042	11654009	0.00106177	26	-3.22581	0.00106177	Antisense
ZK652.10	chrIII	-	7855765	7857168	0.0472597	10	-3.22581	0.0472597	Antisense
ZK662.4	chrX	+	15726056	15731533	0.0207649	13	-3.22581	0.0207649	Antisense
ZK688.5	chrIII	-	7885016	7891544	0.0252786	13	-3.22581	0.00996251	Antisense
B0511.13	chrI	-	10633507	10636006	0.0138018	16	-3.125	0.0138018	Antisense
C10H11.9	chrI	-	4738170	4744322	1.4e-06	63	-3.125	1.4e-06	Antisense
C12D8.1	chrV	-	10236131	10238831	0.0042723	22	-3.125	0.0031124	Antisense	Direct
C14A4.2	chrII	+	10581054	10582441	0.0108726	16	-3.125	0.0108726	Antisense
C23G10.4	chrIII	+	6198845	6201990	5.69e-07	63	-3.125	0.0247649	Antisense	Direct
C25A1.8	chrI	-	10184466	10185457	0.000885207	29	-3.125	0.000885207	Antisense
C26F1.3	chrV	+	7777280	7778822	0.0108726	16	-3.125	0.0108726	Antisense
C28H8.3	chrIII	+	5908711	5914435	0.00309701	22	-3.125	0.00309701	Antisense	Direct
C38D4.3	chrIII	+	4786043	4792355	1.16e-06	58	-3.125	1.16e-06	Antisense	Direct
C39E9.14	chrIV	-	13096950	13098782	0.0042723	22	-3.125	0.0330591	Antisense
C41G7.4	chrI	+	9519625	9521181	0.0057735	19	-3.125	0.0057735	Antisense
C53B4.4	chrIV	+	8973677	8984686	0.0057735	19	-3.125	0.00141091	Antisense
D1054.2	chrV	+	10770355	10771193	0.0108726	16	-3.125	0.0108726	Antisense	Direct
D2030.6	chrI	-	7585508	7588356	0.00309701	22	-3.125	6.29e-21	Sense	Direct
D2096.8	chrIV	-	8377686	8379301	7.06e-06	54	-3.125	7.06e-06	Antisense	Direct
E01A2.6	chrI	-	4137166	4138953	6.27e-08	79	-3.125	6.27e-08	Antisense	Direct
F09G2.2	chrV	+	7196896	7198417	1.88e-05	45	-3.125	1.88e-05	Antisense	Direct
F33H1.4	chrII	+	10174569	10180048	5.32e-05	41	-3.125	5.32e-05	Antisense
F33H2.5	chrI	-	15005605	15013861	2.04e-07	71	-3.125	2.04e-07	Antisense
F34D10.4	chrIII	+	3736602	3739351	1.88e-13	136	-3.125	1.88e-13	Antisense	Direct
F44A2.1	chrV	+	9323183	9327182	5.32e-05	41	-3.125	0.000951356	Antisense	Direct
F56A3.4	chrI	-	5171302	5175525	5.44e-09	90	-3.125	5.44e-09	Antisense
F56D12.5	chrII	+	1321040	1323093	1.05e-05	48	-3.125	0.0140946	Antisense	Direct
H05L14.2	chrI	+	7981587	7993131	0.0108726	16	-3.125	0.0108726	Antisense	Direct
H28O16.2	chrI	-	12647364	12652076	0.00764061	19	-3.125	0.00764061	Antisense
M01E11.3	chrI	+	5573245	5576745	0.00309701	22	-3.125	0.00309701	Antisense	Direct
M03C11.8	chrIII	-	10428214	10435870	0.0138018	16	-3.125	0.0138018	Antisense	Direct
R05D3.2	chrIII	+	8372173	8375084	0.000174464	35	-3.125	0.000174464	Antisense
R06F6.4	chrII	-	10793496	10796216	0.00764061	19	-3.125	0.00764061	Antisense
T05C12.7	chrII	+	8185375	8187317	0.0108726	16	-3.125	0.0108726	Antisense	Direct
T05C3.5	chrV	-	5503221	5504829	0.0138018	16	-3.125	0.0138018	Antisense	Direct
T20G5.1	chrIII	+	10203714	10209598	2.95e-05	44	-3.125	2.95e-05	Antisense	Direct
T22B11.5	chrIV	-	4696907	4704002	0.0138018	16	-3.125	0.0138018	Antisense	Direct
T23G11.3	chrI	+	7695675	7698222	5.84e-06	51	-3.125	5.84e-06	Antisense	Direct
Y102A5A.1	chrV	+	16802844	16814539	0.000317305	32	-3.125	0.000317305	Antisense
Y110A7A.1	chrI	+	5165159	5171302	5.84e-06	51	-3.125	0.0330591	Antisense
Y39G10AR.7	chrI	+	2316307	2318286	4.36e-21	224	-3.125	4.36e-21	Antisense	Direct
Y54E2A.3	chrII	-	14752788	14753796	3.12e-07	70	-3.125	3.12e-07	Antisense
Y54F10AL.2	chrIII	+	2473855	2486609	0.0108726	16	-3.125	0.00541783	Antisense	Direct
Y55D9A.1	chrIV	-	12605668	12614689	0.000885207	29	-3.125	0.0404929	Antisense
ZC168.4	chrIV	+	10735326	10737147	0.0108726	16	-3.125	0.0472597	Antisense
ZK1127.9	chrII	-	7045979	7050012	0.0138018	16	-3.125	0.0489496	Antisense
B0336.2	chrIII	+	5716063	5717534	0.000497514	31	-3.0303	1.93e-08	Antisense
C30C11.4	chrIII	-	8444177	8446806	0.000254847	37	-3.0303	0.000254847	Antisense
C32E8.11	chrI	-	3807474	3816798	0.00240706	25	-3.0303	0.00240706	Antisense
C50C3.6	chrIII	+	8164302	8172628	2.76e-08	80	-3.0303	2.76e-08	Antisense	Direct
F11H8.4	chrIII	-	7023575	7029130	3.21e-05	47	-3.0303	0.0286777	Antisense	Direct
F54E12.2	chrIV	-	11333212	11336834	0.000776956	31	-3.0303	0.000776956	Antisense	Direct
F58G11.3	chrV	-	13669348	13671929	4.89e-05	46	-3.0303	7.93e-05	Antisense
H34C03.2	chrIV	+	6757294	6762572	8.3e-05	40	-3.0303	8.3e-05	Antisense	Direct
R08D7.6	chrIII	-	8974976	8981808	6.27e-06	56	-3.0303	0.0140946	Antisense	Direct
R09B3.2	chrI	-	11909347	11910094	0.00240706	25	-3.0303	0.00240706	Antisense
T05G5.3	chrIII	+	9747373	9748568	5.8e-11	111	-3.0303	5.8e-11	Antisense
T07F8.3	chrII	+	7132581	7137398	0.0016741	25	-3.0303	2.26e-05	Antisense	Direct
T26A5.5	chrIII	+	6454424	6459952	0.000272969	34	-3.0303	0.00304065	Antisense	Direct
Y48B6A.1	chrII	-	14151086	14154276	0.000776956	31	-3.0303	0.000776956	Antisense	Direct
Y53C12A.1	chrII	-	9713658	9716389	0.00136426	28	-3.0303	0.00136426	Antisense	Direct
Y71F9B.7	chrI	-	2755818	2758205	3.21e-05	47	-3.0303	3.21e-05	Antisense
Y73B6BL.6	chrIV	+	6324193	6326388	0.000150273	37	-3.0303	0.00142042	Antisense	Direct
ZK1067.2	chrII	+	9215133	9222774	1.58e-10	107	-3.0303	1.58e-10	Antisense	Direct
ZK507.6	chrIII	-	9106626	9109183	3.23e-06	61	-3.0303	3.23e-06	Antisense
B0304.2	chrII	+	4523631	4524514	0.0330591	12	-2.94118	0.0330591	Antisense
B0336.9	chrIII	-	5702293	5705409	0.000387929	36	-2.94118	0.0358551	Antisense
C03D6.4	chrI	-	9660166	9664903	0.000677164	33	-2.94118	0.000677164	Antisense
C16A3.1	chrIII	+	6390887	6393617	0.00261795	24	-2.94118	1.35e-12	Antisense
C25A1.10	chrI	-	10187539	10190885	4.29e-05	48	-2.94118	0.0140946	Antisense
C27D11.1	chrIII	-	7824310	7828553	0.00208703	27	-2.94118	0.00208703	Antisense
C28A5.2	chrIII	-	4434720	4439514	0.00369097	24	-2.94118	0.00369097	Antisense
C36E8.5	chrIII	-	4016041	4017598	0.000387929	36	-2.94118	0.000387929	Antisense
C39E9.13	chrIV	+	13095730	13096950	0.0330591	12	-2.94118	0.0330591	Antisense
F01F1.9	chrIII	-	5861808	5863498	0.00657019	21	-2.94118	0.00657019	Antisense
F08H9.1	chrV	+	14457452	14459875	0.00261795	24	-2.94118	0.00261795	Antisense
F10G7.3	chrII	+	4702056	4703200	2.41e-09	94	-2.94118	2.41e-09	Antisense	Direct
F13B12.1	chrIV	-	10422713	10424590	0.0214078	15	-2.94118	0.0214078	Antisense
F20C5.3	chrIV	-	8753368	8754794	2.49e-05	51	-2.94118	2.49e-05	Antisense	Direct
F20G4.1	chrI	-	7918436	7926331	0.00657019	21	-2.94118	0.00657019	Antisense
F25G6.9	chrV	-	8565273	8569953	0.0394744	12	-2.94118	0.0394744	Antisense
F27C1.6	chrI	-	5421510	5426359	0.0214078	15	-2.94118	0.0214078	Antisense	Direct
F29G9.2	chrV	+	6018976	6026320	0.00142042	27	-2.94118	0.00679401	Antisense	Direct
F31D4.3	chrV	+	20841567	20842955	0.00485693	21	-2.94118	0.00485693	Antisense
F33H1.3	chrII	+	10172846	10174202	0.0171954	15	-2.94118	0.0171954	Antisense
F40F9.1	chrV	+	9705328	9707818	0.0090873	18	-2.94118	0.0050045	Antisense
F53C11.4	chrV	-	13784704	13787116	0.0394744	12	-2.94118	0.0394744	Antisense
F56D1.4	chrII	+	5466337	5473773	0.0171954	15	-2.94118	0.00888238	Antisense
F58B3.6	chrIV	+	11636617	11638164	0.0171954	15	-2.94118	0.0171954	Antisense	Direct
H21P03.1	chrIV	-	11479331	11480156	0.00657019	21	-2.94118	0.00657019	Antisense
K01G5.4	chrIII	-	10746771	10747608	0.0394744	12	-2.94118	0.0394744	Antisense	Direct
K03H1.2	chrIII	-	9952084	9956109	0.00118627	30	-2.94118	0.00118627	Antisense
K04D7.1	chrIV	+	10176680	10177801	0.00142042	27	-2.94118	0.00142042	Antisense	Direct
K05C4.6	chrI	+	14739555	14742644	0.000424398	33	-2.94118	0.000424398	Antisense
K08E3.6	chrIII	-	13768680	13771103	0.00118627	30	-2.94118	0.00118627	Antisense
K08E4.1	chrIV	+	12051456	12055756	0.00142042	27	-2.94118	0.00142042	Antisense
M01E11.6	chrI	-	5577057	5579302	0.0171954	15	-2.94118	3.64e-28	Sense	Direct
M01F1.8	chrIII	-	3499373	3502522	0.0117937	18	-2.94118	0.00122401	Antisense
M03A1.6	chrII	-	4590900	4598990	0.0117937	18	-2.94118	0.00599936	Antisense	Direct
R01B10.5	chrV	-	6048543	6051214	0.00118627	30	-2.94118	0.00118627	Antisense	Direct
R05F9.11	chrII	-	4911854	4914202	0.00118627	30	-2.94118	0.00118627	Antisense
R05H10.2	chrII	+	14857160	14866490	0.00485693	21	-2.94118	0.00485693	Antisense	Direct
R06C7.1	chrI	+	7235381	7238787	0.00142042	27	-2.94118	0.00142042	Antisense	Direct
R07B7.2	chrV	-	12056588	12059724	0.0214078	15	-2.94118	0.0214078	Antisense	Direct
R107.5	chrIII	-	9051514	9053696	0.0394744	12	-2.94118	0.00177031	Antisense
T05A7.6	chrII	-	4668689	4671762	0.0394744	12	-2.94118	0.0394744	Antisense
T09E8.3	chrV	+	13180310	13181516	0.0330591	12	-2.94118	0.0330591	Antisense
T12C9.7	chrII	-	4458255	4460342	0.0117937	18	-2.94118	0.000337351	Antisense
T21B10.7	chrII	+	8927664	8929403	0.0171954	15	-2.94118	0.0171954	Antisense
T21G5.3	chrI	+	6854686	6857528	5.74e-10	104	-2.94118	5.74e-10	Antisense	Direct
T24B8.1	chrII	-	9056453	9057000	0.0394744	12	-2.94118	0.0394744	Antisense	Direct
T24F1.1	chrII	+	11301280	11302371	0.0171954	15	-2.94118	0.0171954	Antisense
W02B12.2	chrII	-	11451400	11452871	1.44e-05	54	-2.94118	1.44e-05	Antisense	Direct
W02D9.3	chrI	+	12535310	12537657	0.0330591	12	-2.94118	0.0330591	Antisense
W03G9.3	chrI	+	4959397	4961520	0.0330591	12	-2.94118	0.0330591	Antisense	Direct
Y110A2AR.1	chrII	+	2919711	2920821	0.0330591	12	-2.94118	0.0330591	Antisense
Y22D7AL.5	chrIII	+	1619738	1625790	0.0394744	12	-2.94118	0.0159245	Sense	Direct
Y24D9A.1	chrIV	+	4408598	4414672	0.00142042	27	-2.94118	0.0167012	Antisense
Y37D8A.11	chrIII	-	12875750	12877457	0.00369097	24	-2.94118	0.0286777	Antisense	Direct
Y39A1A.15	chrIII	+	10655651	10677044	0.0330591	12	-2.94118	0.0149266	Antisense	Direct
Y39B6A.33	chrV	+	19001919	19006675	0.0090873	18	-2.94118	0.0090873	Antisense	Direct
Y40B10A.8	chrV	-	2061132	2066844	4.88e-06	60	-2.94118	4.88e-06	Antisense	Direct
Y42H9AR.3	chrIV	-	8104335	8107579	0.0394744	12	-2.94118	0.0394744	Antisense
Y44E3A.6	chrI	-	3340214	3349901	0.0394744	12	-2.94118	0.0150803	Antisense
Y47H9C.4	chrI	-	11851555	11868095	0.0394744	12	-2.94118	0.0404929	Antisense
Y54E5B.3	chrI	+	14820393	14821528	0.0171954	15	-2.94118	0.000271249	Antisense
Y55F3AM.12	chrIV	-	1052968	1054786	0.0214078	15	-2.94118	0.0214078	Antisense	Direct
Y59A8B.1	chrV	-	17936726	17948995	0.00208703	27	-2.94118	0.0334882	Antisense	Direct
Y73B6BL.33	chrIV	-	6373155	6376506	0.0117937	18	-2.94118	0.0117937	Antisense
Y73B6BL.38	chrIV	+	6421587	6423481	3.94e-05	45	-2.94118	3.94e-05	Antisense	Direct
Y73B6BL.5	chrIV	+	6329577	6333540	0.00142042	27	-2.94118	0.0286777	Antisense	Direct
Y74C10AR.1	chrI	+	2485869	2489716	0.00485693	21	-2.94118	0.00485693	Antisense
Y76A2A.2	chrIII	-	13439607	13455187	0.0117937	18	-2.94118	0.0117937	Antisense
ZC395.3	chrIII	+	5275183	5277756	0.0330591	12	-2.94118	0.00679401	Antisense	Direct
C09H6.1	chrI	+	8103594	8109221	0.0011978	29	-2.85714	9.78e-05	Antisense	Direct
C27A2.6	chrII	-	5078219	5081145	0.00102545	32	-2.85714	0.00102545	Antisense
C35D10.7	chrIII	+	4856155	4859199	0.000109621	41	-2.85714	0.00141091	Antisense
D2045.1	chrIII	+	10461513	10467936	0.0021987	26	-2.85714	0.0268439	Antisense	Direct
F25B3.1	chrV	+	9550616	9556002	0.00405827	23	-2.85714	0.00405827	Antisense
F25B5.2	chrIII	+	5959253	5961982	0.000198398	38	-2.85714	0.000198398	Antisense	Direct
F31A9.4	chrX	+	1779433	1780523	0.000194007	41	-2.85714	0.0406074	Sense	Direct
F56D1.7	chrII	+	5456277	5458578	0.0021987	26	-2.85714	0.0021987	Antisense
R06F6.5	chrII	-	10796580	10798401	0.0017983	29	-2.85714	0.00764061	Antisense
T10B5.3	chrV	-	1864180	1868567	0.0017983	29	-2.85714	0.0017983	Antisense
Y105E8A.28	chrI	-	14497481	14498278	0.0017983	29	-2.85714	0.0017983	Antisense	Direct
Y110A7A.18	chrI	-	5158513	5162207	2.24e-12	150	-2.85714	2.24e-12	Antisense	Direct
Y41D4B.19	chrIV	-	1567918	1595822	0.0017983	29	-2.85714	0.00956362	Antisense	Direct
Y47G6A.28	chrI	+	3442189	3447705	1.82e-06	62	-2.85714	1.82e-06	Antisense
Y48B6A.11	chrII	-	14234876	14243493	0.00316776	26	-2.85714	0.00316776	Antisense
Y49E10.19	chrIII	-	12446233	12453082	3.27e-05	52	-2.85714	3.27e-05	Antisense
Y54E5A.4	chrI	-	14701296	14706507	0.00561073	23	-2.85714	0.00561073	Antisense
Y6B3A.1	chrI	-	13603889	13626213	0.00316776	26	-2.85714	0.00769584	Antisense	Direct
Y71F9AL.9	chrI	+	2876936	2878038	0.0021987	26	-2.85714	0.0021987	Antisense
ZK328.1	chrIII	+	6020111	6024600	2.87e-05	49	-2.85714	3.51e-05	Antisense
ZK328.5	chrIII	-	6013482	6017841	1.9e-05	55	-2.85714	1.31e-06	Antisense
B0365.3	chrV	-	13126625	13129967	0.0180036	17	-2.77778	0.0180036	Antisense
C13F10.4	chrV	-	7205616	7214869	0.0100061	20	-2.77778	0.0100061	Antisense
C15H11.5	chrV	+	14418073	14420002	1.87e-13	156	-2.77778	1.87e-13	Antisense	Direct
C17E4.5	chrI	-	9420832	9421984	0.0180036	17	-2.77778	0.0180036	Antisense
C17E4.6	chrI	+	9422547	9431104	0.0141441	17	-2.77778	0.0141441	Antisense
C24H11.7	chrIII	-	11751508	11773542	0.000291485	40	-2.77778	0.000291485	Antisense	Direct
C32E8.2	chrI	+	3788035	3788911	0.0268439	14	-2.77778	0.00240706	Antisense	Direct
C41C4.6	chrII	+	8129889	8134653	0.0268439	14	-2.77778	0.0268439	Antisense
D1007.7	chrI	-	4597940	4602667	0.00270563	28	-2.77778	0.00270563	Antisense
D2030.8	chrI	+	7591293	7595193	0.0268439	14	-2.77778	0.0268439	Antisense	Direct
D2045.2	chrIII	-	10452605	10460335	1.49e-07	87	-2.77778	1.49e-07	Antisense	Direct
F27C1.6	chrI	-	5421510	5426359	0.0141441	17	-2.77778	0.0214078	Sense	Direct
F33A8.4.1	chrII	-	11045718	11048956	0.0100061	20	-2.77778	0.0100061	Antisense
F53F4.14	chrV	+	13627640	13629679	0.0268439	14	-2.77778	0.0268439	Antisense
F57B10.4	chrI	+	6566173	6568906	0.0268439	14	-2.77778	0.0268439	Antisense
F59A2.1	chrIII	-	3400976	3404262	4.88e-05	51	-2.77778	0.0207649	Antisense	Direct
K01C8.5	chrII	-	8273534	8275953	0.000506451	37	-2.77778	0.000506451	Antisense
K06A5.4	chrI	+	6460434	6464236	0.00183786	28	-2.77778	0.00183786	Antisense
K07A1.12	chrI	-	9618393	9619748	0.0327808	14	-2.77778	0.0327808	Antisense	Direct
M110.4	chrII	+	8217162	8222302	4.37e-05	48	-2.77778	0.00167332	Antisense	Direct
R07B5.8	chrV	-	9849554	9853714	0.0100061	20	-2.77778	1.83e-05	Antisense
R12E2.1	chrI	+	4182221	4184994	0.0141441	17	-2.77778	0.0141441	Antisense	Direct
R144.10	chrIII	-	5001332	5002274	0.0327808	14	-2.77778	0.0327808	Antisense
R151.3	chrIII	+	7208383	7209684	0.0268439	14	-2.77778	0.0268439	Antisense	Direct
T01C3.1	chrV	-	14987531	14991000	0.0180036	17	-2.77778	0.0180036	Antisense
T01C3.6	chrV	-	15000034	15000513	0.0100061	20	-2.77778	0.0100061	Antisense
T03F6.5	chrIII	-	13371054	13376590	0.0327808	14	-2.77778	0.0327808	Antisense	Direct
T05B11.3	chrV	-	7733602	7734892	0.0327808	14	-2.77778	0.0327808	Antisense
T05H10.7	chrII	-	8067927	8073291	0.0327808	14	-2.77778	1.88e-07	Antisense
T06D8.8	chrII	-	11237523	11238835	0.000291485	40	-2.77778	0.000291485	Antisense	Direct
T17E9.2	chrIII	-	6114426	6116273	0.000251239	42	-2.77778	0.00679401	Antisense
T23H2.1	chrI	+	6447333	6453944	0.00754256	20	-2.77778	0.00754256	Antisense
W09B6.3	chrII	+	1123539	1127796	0.0268439	14	-2.77778	0.0268439	Antisense
Y106G6D.7	chrI	+	10122459	10130194	0.00100537	31	-2.77778	0.00100537	Antisense
Y110A7A.13	chrI	-	5103633	5104915	0.0100061	20	-2.77778	0.0100061	Antisense
Y111B2A.11	chrIII	-	12599183	12608347	0.000291485	40	-2.77778	0.000291485	Antisense	Direct
Y119D3B.11	chrIII	+	1208119	1213639	0.0141441	17	-2.77778	0.000481	Antisense
Y32B12B.4	chrV	+	16553306	16563463	0.00754256	20	-2.77778	0.00754256	Antisense
Y48G8AL.8	chrI	+	1156578	1157464	0.0268439	14	-2.77778	0.000743088	Antisense
Y4C6B.1	chrIV	+	5354476	5356531	0.0141441	17	-2.77778	0.0141441	Antisense
Y57G11C.15	chrIV	-	14822495	14825139	8.41e-05	48	-2.77778	8.41e-05	Antisense
Y69A2AR.16	chrIV	+	2504324	2530286	0.0268439	14	-2.77778	0.0268439	Antisense
Y69A2AR.31	chrIV	-	2650380	2664569	0.00183786	28	-2.77778	0.00227333	Sense	Direct
Y76B12C.6	chrIV	+	1986274	1991719	0.0268439	14	-2.77778	0.0268439	Antisense	Direct
ZC168.6	chrIV	-	10738230	10738630	0.0180036	17	-2.77778	0.0180036	Antisense
ZK742.1	chrV	+	7805044	7814613	0.00100537	31	-2.77778	0.0252786	Antisense
C04D8.1	chrIII	+	8497540	8518793	0.000463295	36	-2.7027	0.000463295	Antisense	Direct
F10G7.2	chrII	+	4706831	4709762	0.00153083	30	-2.7027	0.00153083	Antisense
F20D12.2	chrIV	+	7948656	7953531	0.00337502	25	-2.7027	0.00337502	Antisense	Direct
F41E6.13	chrV	-	8629199	8631302	0.00476834	25	-2.7027	0.00266517	Antisense
F42A9.2	chrIV	+	8620664	8626131	0.000119261	44	-2.7027	0.000119261	Antisense
F48E8.5	chrIII	+	5450697	5452719	0.00623254	22	-2.7027	0.00623254	Antisense
H37A05.1	chrV	-	13650286	13654111	0.000756465	36	-2.7027	0.000756465	Antisense
M7.1	chrIV	-	11081054	11082225	0.00476834	25	-2.7027	0.00476834	Antisense
R09B3.5	chrI	-	11912039	11912666	0.00131771	33	-2.7027	0.00131771	Antisense
T01G9.5	chrI	+	8294870	8296902	0.000214811	41	-2.7027	0.00375542	Antisense
W05B10.1	chrV	-	12659684	12660309	0.00131771	33	-2.7027	0.00131771	Antisense
Y116A8C.36	chrIV	+	17119639	17126194	4.61e-06	63	-2.7027	4.61e-06	Antisense	Direct
Y39B6A.36	chrV	+	18993903	18998159	0.00337502	25	-2.7027	0.00337502	Antisense
Y40B10A.1	chrV	+	2068448	2069143	0.000214811	41	-2.7027	0.045151	Antisense	Direct
Y51H1A.4	chrII	+	13875939	13882483	0.000840831	33	-2.7027	0.000840831	Antisense	Direct
Y56A3A.20	chrIII	-	11919069	11920101	0.00845042	22	-2.7027	0.00845042	Antisense
C05D2.5	chrIII	+	5604413	5607403	0.00513489	24	-2.63158	0.00513489	Antisense	Direct
C56G2.1	chrIII	+	6362923	6366602	0.00070124	35	-2.63158	0.0465642	Antisense
F10E7.8	chrII	-	7101203	7105126	0.0150803	19	-2.63158	0.0150803	Antisense
F21G4.2	chrX	+	9884256	9889638	0.0271545	16	-2.63158	7.23e-17	Sense	Direct
F23F12.6	chrIII	+	6489738	6491118	0.0115902	19	-2.63158	0.0115902	Antisense
F25H2.5	chrI	-	10553182	10553783	0.0150803	19	-2.63158	0.0150803	Antisense	Direct
F29G9.5	chrV	-	6016030	6017652	0.0271545	16	-2.63158	0.0271545	Antisense
F41E6.4	chrV	+	8607776	8615056	0.021749	16	-2.63158	0.00476834	Antisense
F52G3.4	chrX	-	16948271	16952030	7.89e-05	53	-2.63158	7.89e-05	Antisense
F56D2.6	chrIII	-	5589050	5591673	4.76e-07	84	-2.63158	0.000280346	Antisense
K10E9.1	chrI	+	189653	202489	0.00127169	32	-2.63158	0.00127169	Antisense	Direct
M04B2.4	chrIV	-	11518557	11521001	0.0271545	16	-2.63158	0.0271545	Antisense
M117.2	chrIV	-	11820960	11821867	0.000185098	46	-2.63158	0.000185098	Antisense	Direct
T09E8.2	chrV	+	13176691	13180155	0.00513489	24	-2.63158	0.00513489	Antisense
T21G5.3	chrI	+	6854686	6857528	0.0071147	24	-2.63158	5.74e-10	Sense	Direct
T22D1.9	chrIV	-	6906619	6909888	6.8e-06	69	-2.63158	6.8e-06	Antisense	Direct
T27C4.4	chrV	+	3704981	3712509	0.0115902	19	-2.63158	0.00340464	Antisense	Direct
W03F11.6	chrI	+	2160043	2209630	0.021749	16	-2.63158	0.00541783	Antisense
W08G11.4	chrV	+	16357493	16367512	0.0115902	19	-2.63158	0.0115902	Antisense
Y44E3A.4	chrI	-	3320921	3330674	0.0150803	19	-2.63158	0.0150803	Antisense
Y45G12B.2	chrV	+	2694766	2698837	6.92e-06	62	-2.63158	0.000203484	Antisense
Y54E10BL.6	chrI	-	3005427	3013449	0.0271545	16	-2.63158	0.0271545	Antisense
B0041.2	chrI	+	4655347	4659318	0.00422221	26	-2.5641	0.000195277	Antisense
B0047.3	chrII	-	2044702	2045586	0.0126021	21	-2.5641	0.0126021	Antisense
B0379.3	chrI	+	10080146	10085692	0.00190927	31	-2.5641	0.0180036	Antisense
C08H9.2	chrII	-	9886467	9891003	0.0028771	31	-2.5641	0.0028771	Antisense	Direct
C13B4.2	chrII	-	14485739	14488585	0.049488	13	-2.5641	0.049488	Antisense
C16A11.3	chrII	+	4229544	4234317	5.85e-05	52	-2.5641	5.85e-05	Antisense	Direct
C16A3.7	chrIII	+	6375320	6379117	0.00105426	34	-2.5641	0.00105426	Antisense	Direct
D2045.6	chrIII	+	10471122	10475486	0.00422221	26	-2.5641	0.00422221	Antisense
F39B2.1	chrI	+	14791041	14794042	0.0413091	13	-2.5641	0.0413091	Antisense	Direct
F53A2.4	chrIII	+	13341406	13342487	0.0413091	13	-2.5641	0.0413091	Antisense	Direct
F56F3.1	chrIII	-	4471374	4475111	0.000115301	52	-2.5641	0.000115301	Antisense	Direct
F57B9.2	chrIII	+	6946700	6958814	3.28e-05	55	-2.5641	3.28e-05	Antisense	Direct
K06A5.6	chrI	-	6464265	6465709	0.049488	13	-2.5641	0.049488	Antisense
R06A4.2	chrII	+	14361924	14364777	0.00947673	21	-2.5641	0.00947673	Antisense	Direct
T12G3.1	chrIV	+	12034252	12036691	0.000484697	39	-2.5641	0.000484697	Antisense	Direct
T25E12.5	chrV	-	16745208	16746220	0.049488	13	-2.5641	0.049488	Antisense
W03F9.1	chrV	-	124045	126745	0.049488	13	-2.5641	0.049488	Antisense
Y110A7A.9	chrI	+	5119225	5123988	0.0413091	13	-2.5641	0.000198658	Antisense
Y111B2A.22	chrIII	+	12714445	12743809	0.00058352	37	-2.5641	0.00058352	Antisense	Direct
Y32H12A.5	chrIII	-	5376171	5379877	0.049488	13	-2.5641	0.049488	Antisense
Y39B6A.34	chrV	+	19000981	19001801	0.0413091	13	-2.5641	0.0413091	Antisense
Y41D4A.5	chrIV	-	1728048	1737882	0.049488	13	-2.5641	0.049488	Antisense	Direct
Y41E3.1	chrIV	-	14954177	14958875	0.049488	13	-2.5641	0.0311497	Antisense
Y55F3BR.2	chrIV	+	858929	874529	0.0413091	13	-2.5641	0.0413091	Antisense	Direct
Y57A10A.18	chrII	-	12209053	12221703	9.92e-06	68	-2.5641	0.0358551	Antisense
Y66D12A.18	chrIII	+	11510450	11511311	0.0413091	13	-2.5641	0.0413091	Antisense
Y6E2A.9	chrV	+	15726840	15727880	0.00947673	21	-2.5641	0.00239957	Antisense
ZK652.6	chrIII	+	7829335	7832420	0.0413091	13	-2.5641	0.00141091	Antisense
ZK829.7	chrIV	-	11959879	11961505	0.0126021	21	-2.5641	0.0126021	Antisense
E01A2.2	chrI	+	4132500	4135240	0.0176085	18	-2.5	2.32e-06	Antisense
F01F1.12	chrIII	-	5874621	5876421	0.022473	18	-2.5	0.0334882	Antisense
F01G4.1	chrIV	+	11125995	11131140	0.0034671	28	-2.5	0.0034671	Antisense
F13D12.5	chrII	+	11726732	11728347	3.07e-07	87	-2.5	3.07e-07	Antisense	Direct
F17C11.9	chrV	+	10965694	10967907	0.00773906	23	-2.5	0.0358551	Antisense	Direct
F37H8.2	chrII	-	11171665	11175402	0.00118165	38	-2.5	0.00118165	Antisense	Direct
F53F4.11	chrV	-	13622287	13624503	0.0105168	23	-2.5	0.0105168	Antisense	Direct
F54A3.1	chrII	+	2249407	2253961	8.69e-05	51	-2.5	8.69e-05	Antisense	Direct
F57B1.2	chrV	-	13191690	13193519	0.00139936	36	-2.5	0.00139936	Antisense
F59G1.3	chrII	+	5907781	5911171	0.0176085	18	-2.5	0.0176085	Antisense
K07C5.4	chrV	-	10350442	10352950	0.00139936	36	-2.5	0.00139936	Antisense	Direct
R01H10.7	chrIII	-	10261652	10267275	0.00501518	28	-2.5	0.00501518	Antisense
R166.5	chrII	-	10542365	10548831	0.0176085	18	-2.5	0.0334882	Sense	Direct
T04C12.5	chrV	-	11076719	11078131	0.00501518	28	-2.5	0.00501518	Antisense
T10F2.1	chrIII	-	5159691	5162236	0.0105168	23	-2.5	0.000203484	Antisense
W10C6.1	chrII	+	11113257	11120712	0.0034671	28	-2.5	0.0034671	Antisense
Y18D10A.1	chrI	-	12787956	12806570	0.00242283	33	-2.5	0.00242283	Antisense
Y34D9A.4	chrI	-	1030634	1033438	2.47e-11	160	-2.5	2.47e-11	Antisense	Direct
Y75B8A.25	chrIII	+	12273919	12282101	0.000872606	36	-2.5	0.000872606	Antisense
C14C10.4	chrV	-	12592738	12596274	0.0404228	15	-2.43902	0.0404228	Antisense
C47D12.6	chrII	-	11691242	11695573	0.018596	20	-2.43902	0.0404929	Antisense	Direct
C56C10.8	chrII	-	6587915	6588589	0.018596	20	-2.43902	0.018596	Antisense	Direct
F25B5.4	chrIII	+	5940192	5943700	0.00284448	30	-2.43902	0.000198398	Antisense
F26G1.1	chrII	+	4790303	4795618	0.0330023	15	-2.43902	0.0330023	Antisense
F38B7.5	chrV	+	11554779	11558101	1.68e-06	78	-2.43902	1.68e-06	Antisense	Direct
F44C4.4	chrV	-	6606433	6611146	0.0404228	15	-2.43902	0.000127197	Antisense
F59E12.1	chrII	+	5654486	5657343	0.0142566	20	-2.43902	0.0142566	Antisense	Direct
K12H4.8	chrIII	-	8071841	8080200	0.00352097	32	-2.43902	0.00352097	Antisense	Direct
R10E12.1	chrIII	+	9957253	9963025	0.0330023	15	-2.43902	0.0489496	Antisense
T04A11.6	chrIV	+	12490767	12495110	0.0142566	20	-2.43902	0.0142566	Antisense
T21B10.2	chrII	+	8930922	8933698	0.00284448	30	-2.43902	0.0159245	Antisense
T22F3.4	chrV	-	3585365	3586055	0.0404228	15	-2.43902	0.0404228	Antisense
W02A2.6	chrIV	-	13349115	13353161	0.0404228	15	-2.43902	0.0404228	Antisense
Y75B12B.2	chrV	-	15186658	15187336	0.018596	20	-2.43902	0.018596	Antisense	Direct
Y97E10AR.5	chrV	-	8011194	8012325	0.0404228	15	-2.43902	0.0404228	Antisense
B0414.6	chrI	-	5792326	5795117	0.0330849	17	-2.38095	0.0330849	Antisense
C04A2.7	chrII	-	6853401	6858226	0.0153919	22	-2.38095	0.00122589	Antisense	Direct
C48G7.3	chrV	-	14784157	14815578	0.000295182	51	-2.38095	0.00692727	Antisense	Direct
F13D12.4	chrII	+	11728864	11731137	0.00935858	24	-2.38095	0.0167012	Antisense	Direct
F28D9.1	chrI	-	11177834	11182055	0.000501382	48	-2.38095	0.000501382	Antisense	Direct
F45F2.11	chrV	-	8519323	8520740	0.0330849	17	-2.38095	0.0330849	Antisense
F54F2.2	chrIII	+	8793305	8805532	0.0264251	17	-2.38095	0.0334882	Antisense	Direct
F55A3.3	chrI	+	10789118	10793136	0.0115474	22	-2.38095	0.0115474	Antisense	Direct
K04C2.2	chrIII	+	6889710	6895026	0.0264251	17	-2.38095	0.0264251	Antisense
K08E3.4	chrIII	-	13759340	13761949	0.0153919	22	-2.38095	0.0153919	Antisense
R07G3.1	chrII	+	7616382	7618167	0.0264251	17	-2.38095	0.0264251	Antisense
T07A9.6	chrIV	-	419986	425173	0.0330849	17	-2.38095	0.0330849	Antisense
T16H12.11	chrIII	-	10087116	10088439	0.000295182	51	-2.38095	0.000295182	Antisense
T22D1.4	chrIV	+	6910666	6912849	0.00935858	24	-2.38095	0.00935858	Antisense
T23D8.9	chrI	-	9980122	9984814	0.00246745	36	-2.38095	0.00266517	Antisense
Y110A7A.17	chrI	-	5123988	5127202	0.00731014	27	-2.38095	0.0198035	Antisense
Y39A1B.3	chrIII	+	10763028	10777225	0.0264251	17	-2.38095	0.0264251	Antisense	Direct
Y54E10A.11	chrI	-	3176421	3192731	0.0153919	22	-2.38095	0.0153919	Antisense
Y71A12B.9	chrI	-	13943336	13951615	0.012746	24	-2.38095	0.012746	Antisense	Direct
Y71F9B.10	chrI	-	2761172	2776104	0.0330849	17	-2.38095	0.0021987	Antisense
C06C3.1	chrII	+	9358456	9369011	0.0075898	26	-2.32558	3.75e-10	Antisense
C07G1.4	chrIV	-	8188887	8198932	0.0271315	19	-2.32558	0.00100627	Antisense	Direct
C08B11.9	chrII	-	8034265	8038097	0.00507783	31	-2.32558	0.00507783	Antisense
C13G3.3	chrV	-	11027158	11029364	0.00507783	31	-2.32558	0.0100061	Antisense
C43E11.3	chrI	+	4254380	4264690	0.0212034	19	-2.32558	0.00131377	Antisense	Direct
F37D6.3	chrI	+	10486704	10487313	0.0075898	26	-2.32558	0.0075898	Antisense	Direct
F42A6.7	chrIV	-	3336922	3338863	0.00507783	31	-2.32558	0.0199812	Antisense	Direct
T05E12.8	chrV	+	17069215	17069502	9.13e-10	153	-2.32558	9.57e-09	Sense	Direct
T21B10.3	chrII	+	8934301	8938953	0.0075898	26	-2.32558	0.0075898	Antisense
W09D10.2	chrIII	-	10722039	10729325	9.5e-06	79	-2.32558	9.5e-06	Antisense
Y63D3A.5	chrI	+	14102033	14104196	2.98e-06	81	-2.32558	2.98e-06	Antisense	Direct
Y76A2B.6	chrIII	-	13550578	13555214	0.0271315	19	-2.32558	0.0271315	Antisense
ZK1307.6	chrII	-	9640916	9644388	0.0271315	19	-2.32558	0.0271315	Antisense
B0250.8	chrV	-	20465090	20465873	0.00875631	28	-2.27273	0.00875631	Antisense
B0336.3	chrIII	+	5711498	5714738	0.000104247	58	-2.27273	0.000104247	Antisense
C07G2.1	chrIII	+	4489324	4491364	0.00500268	30	-2.27273	0.0271315	Antisense	Direct
C29E4.4	chrIII	+	7928977	7932922	0.00228426	35	-2.27273	0.00228426	Antisense	Direct
F11A10.4	chrIV	+	12096748	12105732	0.00615972	28	-2.27273	0.00615972	Antisense
F43G6.9	chrII	-	11774948	11777836	0.0222895	21	-2.27273	0.0222895	Antisense
F49C12.12	chrIV	-	9320098	9321068	0.0222895	21	-2.27273	0.0222895	Antisense
F54H12.1	chrIII	+	7973645	7977100	0.0493571	14	-2.27273	0.00400641	Antisense
K02F2.3	chrI	+	6814528	6820547	0.0493571	14	-2.27273	0.0493571	Antisense
K04G2.8	chrI	+	8050036	8055460	0.0137287	23	-2.27273	0.00679401	Antisense	Direct
K07B1.7	chrV	-	9345084	9346935	0.0137287	23	-2.27273	6.9e-17	Sense
K08A2.1	chrII	+	2998683	3000545	0.0137287	23	-2.27273	0.0137287	Antisense	Direct
K08D12.3	chrIV	+	1710255	1711126	0.00615972	28	-2.27273	5.3e-05	Antisense
K10D2.1	chrIII	+	5188695	5196644	0.0493571	14	-2.27273	0.0153302	Antisense	Direct
R31.2	chrV	+	11917540	11924629	0.000270159	51	-2.27273	0.00852517	Antisense	Direct
T05F1.2	chrI	+	9622538	9624881	0.0170465	21	-2.27273	0.0170465	Antisense
T09A5.11	chrII	+	7864437	7865937	8.58e-05	60	-2.27273	8.58e-05	Antisense
Y48A6B.11	chrIII	+	11063410	11068635	0.00615972	28	-2.27273	0.0317484	Antisense
Y54E2A.6	chrII	+	14772891	14778039	0.0493571	14	-2.27273	3.12e-07	Antisense
Y87G2A.5	chrI	-	13548061	13559349	0.0222895	21	-2.27273	0.0222895	Antisense
B0303.9	chrIII	+	8700835	8703213	0.0391316	16	-2.22222	0.0391316	Antisense	Direct
C05H8.1	chrIII	+	5635432	5654487	0.0311497	18	-2.22222	0.0286777	Antisense	Direct
C06A5.1	chrI	+	6012059	6021985	0.0391316	16	-2.22222	0.0391316	Antisense
C07H6.2	chrIII	+	7520927	7521362	0.0391316	16	-2.22222	0.0391316	Antisense
C48B4.10	chrIII	-	9563489	9564401	0.0391066	18	-2.22222	0.0391066	Antisense
F15D3.7	chrI	+	11578630	11579584	0.0391316	16	-2.22222	0.0391316	Antisense
F20D12.1	chrIV	+	7957562	7962104	0.0151156	25	-2.22222	2.49e-05	Sense	Direct
F26A3.3	chrI	-	7650412	7656331	0.00416432	36	-2.22222	0.00416432	Antisense
F32H2.1	chrI	+	8962313	8966110	0.0311497	18	-2.22222	0.000466911	Antisense	Direct
F36F2.3	chrI	-	9009251	9013877	0.0480708	16	-2.22222	0.000403103	Antisense
F55A12.3	chrI	+	5358522	5365173	0.0391316	16	-2.22222	0.0391316	Antisense
F57B10.12	chrI	-	6564746	6565869	0.0391066	18	-2.22222	0.0391066	Antisense	Direct
K08D12.1	chrIV	-	1708801	1709743	5.3e-05	71	-2.22222	5.3e-05	Antisense	Direct
K08F11.1	chrIV	+	4724852	4725304	0.0391316	16	-2.22222	0.0391316	Antisense	Direct
K10C3.6	chrI	+	9871217	9874580	0.0391316	16	-2.22222	0.0140946	Antisense
T19B4.7	chrI	-	5679845	5691506	0.0480708	16	-2.22222	0.0480708	Antisense
Y39A3CL.7	chrIII	+	1824907	1876744	0.002691	36	-2.22222	0.0264251	Antisense	Direct
Y41D4B.4	chrIV	+	1660109	1669681	0.0311497	18	-2.22222	0.0311497	Antisense	Direct
Y51H7C.11	chrII	-	1425763	1437505	0.0480708	16	-2.22222	0.0480708	Antisense	Direct
Y54F10AM.11	chrIII	-	2562970	2563978	0.0480708	16	-2.22222	0.0480708	Antisense
Y55F3AL.1	chrIV	+	959451	984392	0.0391316	16	-2.22222	0.0391316	Antisense
ZK637.3	chrIII	+	8890137	8894113	0.0391316	16	-2.22222	0.0391316	Antisense
C24H12.5	chrII	-	406139	410918	0.0319156	20	-2.17391	0.000581735	Antisense
F08B4.5	chrIV	-	8682470	8686593	0.0319156	20	-2.17391	0.0319156	Antisense
F15D4.1	chrII	+	13200078	13215613	0.00723568	29	-2.17391	0.00723568	Antisense	Direct
F45H11.3	chrI	+	10374803	10380738	0.0199258	22	-2.17391	0.0307579	Antisense
K10B2.5	chrII	-	6361137	6365255	0.00346342	38	-2.17391	0.00346342	Antisense	Direct
R166.5	chrII	-	10542365	10548831	0.00852517	31	-2.17391	0.0334882	Antisense	Direct
R74.3	chrIII	+	4193793	4195329	0.0248786	20	-2.17391	0.0334882	Antisense	Direct
Y38F1A.10	chrII	-	13014239	13025746	0.0103064	29	-2.17391	2.7e-07	Antisense
Y6D1A.1	chrII	-	11820499	11823534	0.00239957	42	-2.17391	0.00239957	Antisense
Y75B8A.22	chrIII	-	12240354	12250034	0.00852517	31	-2.17391	0.00852517	Antisense	Direct
ZK20.3	chrII	-	11651176	11652911	0.00288207	40	-2.17391	0.00288207	Antisense
C56G2.7	chrIII	-	6338452	6341870	0.0144936	28	-2.12766	0.0144936	Antisense
D1043.1	chrII	+	11582761	11588441	0.0159973	24	-2.12766	0.0159973	Antisense	Direct
F09E8.3	chrIV	+	13155196	13164025	0.0103728	28	-2.12766	0.0103728	Antisense	Direct
F11G11.7	chrII	+	4852043	4857789	0.0159973	24	-2.12766	0.0159973	Antisense
F22D3.2	chrII	+	6928706	6947823	0.0159973	24	-2.12766	0.0317484	Antisense
F44E2.2	chrIII	+	8853709	8861292	1.62e-40	895	-2.12766	0.0110239	Sense	Direct
H02I12.1	chrIV	+	11372961	11377571	0.000791083	48	-2.12766	0.000791083	Antisense	Direct
T07C4.3	chrIII	+	10352077	10355010	0.000249686	57	-2.12766	1.31e-11	Antisense	Direct
T19E10.1	chrII	-	10778320	10783210	0.00585048	35	-2.12766	0.00603179	Antisense	Direct
Y37H2A.1	chrV	+	18108234	18114699	0.0159973	24	-2.12766	0.0159973	Antisense
F20C5.1	chrIV	+	8746235	8752658	0.0451602	17	-2.08333	0.00603179	Antisense
F31A9.2	chrX	+	1794811	1795669	0.000912652	49	-2.08333	0.000912652	Antisense	Direct
F41H10.3	chrIV	+	5369794	5374885	0.0358688	19	-2.08333	7.75e-13	Antisense
F43E2.1	chrII	+	7375217	7377520	0.0451602	17	-2.08333	0.0451602	Antisense	Direct
F52D2.8	chrX	+	1983708	1984828	0.045151	19	-2.08333	0.000232708	Sense	Direct
Y105E8B.4	chrI	+	14647768	14651427	0.00837351	30	-2.08333	0.00837351	Antisense
Y39H10A.7	chrV	-	3756996	3759455	0.045151	19	-2.08333	3.54e-06	Antisense
Y57G11C.10	chrIV	-	14790778	14792846	0.00986752	32	-2.08333	0.0199812	Antisense	Direct
C01H6.9	chrI	-	7229433	7233118	0.0201947	27	-2.04082	0.0201947	Antisense
C36A4.5	chrIII	+	3844253	3848241	0.0228661	23	-2.04082	0.0228661	Antisense	Direct
F07C6.4	chrIV	+	12817029	12830069	0.0183331	25	-2.04082	0.000165183	Antisense	Direct
F54D11.2	chrV	+	4617932	4627566	0.00237694	42	-2.04082	0.00237694	Antisense	Direct
R11A5.2	chrI	-	7857815	7859411	0.0367744	21	-2.04082	0.0367744	Antisense
R144.4	chrIII	+	5018610	5021093	0.0228661	23	-2.04082	0.0327808	Antisense	Direct
R74.8	chrIII	+	4206249	4208238	0.0183331	25	-2.04082	0.0248786	Antisense	Direct
W08F4.8	chrII	-	577836	580591	0.00183915	50	-2.04082	0.00888238	Antisense
Y48G10A.2	chrI	-	13477319	13487392	0.0166072	29	-2.04082	0.0166072	Antisense
Y82E9BR.2	chrIII	+	1439085	1443180	0.0095663	31	-2.04082	0.0095663	Antisense	Direct
ZK1055.1	chrV	+	6594208	6599123	0.0367744	21	-2.04082	4.66e-39	Sense	Direct
ZK632.1	chrIII	+	9794265	9798541	0.0228661	23	-2.04082	0.00879452	Antisense	Direct
C28C12.2	chrIV	+	8499300	8500063	1.23e-09	187	-2	1.23e-09	Antisense	Direct
Y65B4BL.2	chrI	+	506479	509059	0.000967466	53	-2	0.000967466	Antisense	Direct
F11A10.1	chrIV	+	12079443	12084330	0.0405429	20	-1.96078	0.00177031	Antisense
R11A8.1	chrIV	-	10355094	10357134	0.0340326	24	-1.96078	0.0340326	Antisense	Direct
R144.7	chrIII	-	5008900	5017613	0.00113842	60	-1.96078	0.0228661	Antisense	Direct
T01C3.3	chrV	-	14991684	14992653	0.00342058	48	-1.96078	0.00342058	Antisense
Y116F11A.1	chrV	+	19725976	19727554	0.000661189	66	-1.96078	4.61e-06	Sense	Direct
Y55B1AR.2	chrIII	-	587189	598114	0.00872183	38	-1.96078	0.000466911	Antisense
ZC434.5	chrI	+	10336402	10340801	0.0405429	20	-1.96078	0.0405429	Antisense
C09G4.5	chrIV	+	8511265	8513902	0.00150229	53	-1.92308	0.00150229	Antisense	Direct
F59C12.4	chrX	-	16602361	16602634	0.0118307	37	-1.92308	0.0118307	Antisense	Direct
B0280.5	chrIII	-	7102011	7103920	0.0465642	23	-1.88679	0.0465642	Antisense	Direct
F31C3.2	chrI	+	15036359	15040474	0.0120908	33	-1.88679	0.0406074	Antisense
F49E8.1	chrIV	+	7556651	7559300	0.00748465	44	-1.88679	4.71e-07	Sense
T05C12.6	chrII	-	8182256	8184938	0.0380641	25	-1.88679	1.6e-06	Antisense
B0047.1	chrII	-	2040368	2041616	0.0233893	32	-1.85185	0.00996251	Antisense	Direct
T23B5.3	chrIV	+	12691917	12703969	0.0166056	32	-1.85185	0.00175735	Antisense
Y116A8B.1	chrIV	+	17216255	17217324	2.11e-21	613	-1.85185	0.0031124	Sense	Direct
C32D5.10	chrII	-	6349161	6351938	0.0421152	26	-1.81818	0.0421152	Antisense
C52E2.6	chrII	-	1846592	1848156	0.0212699	35	-1.81818	0.0212699	Antisense	Direct
K08B4.1	chrIV	+	6095394	6110623	0.0318367	26	-1.81818	0.0137287	Antisense
F10F2.1	chrIII	-	4596107	4612302	0.0312441	31	-1.78571	0.0312441	Antisense
Y17G7B.5	chrII	-	12001432	12006540	0.0312441	31	-1.78571	8.8e-06	Antisense
T01C8.5	chrX	-	16791292	16793043	0.0106964	52	-1.69492	0.0106964	Antisense	Direct
F07E5.8	chrII	-	2072361	2075831	0.0428299	35	-1.63934	0.0428299	Antisense
F31D4.5	chrV	+	20849530	20853487	0.000882131	101	-1.63934	0.00485693	Sense
F41H10.5	chrIV	+	5361001	5361970	0.0028628	87	-1.6129	0.00692727	Sense
Y38A10A.5	chrV	-	6099154	6100492	0.0339007	41	-1.6129	0.0339007	Antisense
C30G12.7	chrII	-	7296092	7298187	0.0135294	70	-1.51515	0.0135294	Antisense
F52D2.6	chrX	+	1974907	1980932	0.000232708	140	-1.51515	0.000232708	Antisense	Direct
T05E12.8	chrV	+	17069215	17069502	9.57e-09	364	-1.51515	9.57e-09	Antisense	Direct
T22F3.3	chrV	+	3579043	3585036	0.0334263	48	-1.47059	2.42e-08	Antisense	Direct
F52D2.6	chrX	+	1974907	1980932	0.0180622	82	-1.42857	0.000232708	Sense	Direct
F55C9.5	chrV	-	19290628	19290943	9.17e-06	280	-1.40845	0.0065968	Sense	Direct
E01G4.7	chrII	+	13478065	13478835	0.0200802	111	-1.35135	0.0123047	Sense	Direct
Y105C5A.14	chrIV	-	15646113	15648073	0.0328586	77	-1.33333	0.0247649	Sense	Direct
F31A9.4	chrX	+	1779433	1780523	0.0406074	87	-1.26582	0.0406074	Antisense	Direct
F39E9.10	chrII	-	3302775	3303315	0.00807311	349	1.21	0.00807311	Antisense	Inverse
C44B11.6	chrIII	+	3152725	3153450	5.69e-06	1669	1.22	5.69e-06	Antisense	Inverse
C01A2.1	chrI	-	13408784	13410495	0.0202553	193	1.24	0.0202553	Antisense	Inverse
W04B5.2	chrIII	+	2424342	2427460	0.000477207	126	1.55	0.000477207	Antisense	Inverse
ZK185.2	chrIV	+	4536545	4541764	0.0366272	26	1.69	0.0366272	Antisense	Inverse
F17E9.5	chrIV	+	8345798	8346528	0.0161628	25	1.84	0.0161628	Antisense
F39E9.6	chrII	-	3310282	3311925	0.00541582	33	1.85	0.00807311	Sense	Inverse
F43E2.6	chrII	-	7367383	7368783	1.44e-59	1256	1.85	0.0451602	Sense	Inverse
F07G6.6	chrX	-	1710288	1711208	0.0476199	10	2.04	0.0476199	Antisense	Inverse
H12C20.2	chrV	-	11568927	11573069	0.0376326	9	2.27	0.0108726	Sense
H06I04.4	chrIII	+	3068324	3069151	0.03645	8	2.29	0.0108726	Sense
Y52B11A.3	chrI	+	10970485	10980104	0.0454634	8	2.29	0.00018125	Antisense
Y60A3A.27	chrV	+	19957891	19959845	0.0222173	10	2.34	0.0222173	Antisense
F43E2.6	chrII	-	7367383	7368783	3.42e-77	571	2.45	0.0451602	Antisense	Inverse
M03A1.1	chrII	+	4571987	4590900	0.00599936	9	2.83	1.16e-05	Antisense	Inverse
Y111B2A.12	chrIII	+	12609168	12617941	0.0444305	4	3.06	0.0444305	Antisense	Inverse
F52C12.4	chrIV	+	1923569	1946202	0.000316136	9	3.51	0.00933153	Sense	Inverse
Y38C1AA.7	chrIV	+	158966	159830	0.00385201	6	3.57	0.00385201	Antisense	Inverse
F39E9.1	chrII	+	3315878	3320354	0.0206166	3	4.08	0.0206166	Antisense	Inverse
H35N09.2	chrX	-	8603463	8606162	6.74e-08	13	4.55	8.3e-05	Sense	Inverse
C34D4.14	chrIV	-	7134329	7144547	0.0370474	2	4.59	5.08e-09	Sense	Inverse
F56H11.3	chrIV	+	9529963	9531204	0.0370474	2	4.59	0.0370474	Antisense
Y41E3.11	chrIV	+	15042396	15049324	0.031956	2	4.59	0.00122589	Sense	Inverse
Y53F4B.15	chrII	+	15039304	15048806	0.0077106	3	4.76	0.0077106	Antisense
C55B7.4	chrI	+	6497439	6499561	0.0340037	0	5.1	0.000365039	Antisense
F12E12.8	chrII	-	3749062	3750713	0.0340037	0	5.1	3.21e-05	Sense
F25C8.3	chrV	+	20875241	20894294	0.0340037	0	5.1	0.00284448	Antisense
F45H10.1	chrII	-	13487102	13491696	0.0307579	0	5.1	0.00522624	Antisense
F52G2.2	chrIV	-	13521936	13539561	0.0340037	0	5.1	0.0404929	Sense	Inverse
Y111B2A.4	chrIII	+	12499440	12506438	0.0307579	0	5.1	0.0140946	Sense
Y47D3A.21	chrIII	-	11276173	11278798	0.0340037	0	5.1	0.00787011	Sense
Y48G1BM.5	chrI	-	229089	234973	0.0340037	0	5.1	0.0294698	Sense
Y49E10.11	chrIII	-	12398803	12420544	0.0340037	0	5.1	0.00692727	Sense
Y53F4B.17	chrII	+	15058128	15061959	0.0340037	0	5.1	0.0340037	Antisense
Y55F3BR.4	chrIV	+	845880	848850	0.0307579	0	5.1	0.0413091	Sense
Y59A8B.10	chrV	-	18069985	18077425	0.0340037	0	5.1	0.0334882	Sense
Y59A8B.6	chrV	+	18022451	18042190	0.0109027	2	5.61	6.76e-08	Sense	Inverse
C05D11.12	chrIII	-	6444818	6446848	0.0172914	0	6.12	0.00603179	Sense
K10C9.3	chrV	-	1061596	1067861	0.0153302	0	6.12	0.0153302	Antisense
W02A11.2	chrI	-	12733407	12736576	0.0172914	0	6.12	0.000466911	Sense
Y111B2A.12	chrIII	+	12609168	12617941	0.0153302	0	6.12	0.0444305	Sense	Inverse
Y50D7A.7	chrIII	-	295712	298530	0.0172914	0	6.12	0.0286777	Sense	Inverse
Y69E1A.8	chrIV	+	10966559	10968081	0.00769584	2	6.12	0.00769584	Antisense
Y79H2A.3	chrIII	-	12041972	12052184	0.0172914	0	6.12	2.18e-05	Sense
C37H5.6	chrV	-	4818751	4823330	0.00879298	0	7.14	0.00226127	Sense	Inverse
R10F2.1	chrIII	+	2910959	2935547	0.00879298	0	7.14	0.00879298	Antisense	Inverse
T28F12.3	chrV	-	4517667	4549277	0.00879298	0	7.14	0.00141091	Sense
Y41D4A.5	chrIV	-	1728048	1737882	0.00879298	0	7.14	0.049488	Sense	Inverse
Y44E3A.6	chrI	-	3340214	3349901	0.0390442	1	7.14	0.0150803	Sense
Y54E10A.3	chrI	+	3229432	3233295	0.0344684	1	7.14	8.32e-05	Sense
C07G2.1	chrIII	+	4489324	4491364	0.000627132	2	8.16	0.0271315	Sense	Inverse
H12C20.2	chrV	-	11568927	11573069	0.000627132	2	8.16	0.0108726	Antisense
T23G11.1	chrI	-	7701411	7702030	0.0190897	1	8.16	0.0190897	Antisense
Y46E12BL.2	chrII	+	15233054	15244833	0.0190897	1	8.16	2.58e-06	Sense	Inverse
Y62F5A.1	chrII	-	11527156	11533730	2e-05	3	8.5	1.62e-07	Sense	Inverse
C39B5.2	chrIII	+	2233875	2236970	2.49e-13	8	8.92	2.49e-13	Antisense	Inverse
Y51H4A.3	chrIV	-	16482756	16488980	0.00227377	0	9.18	0.0159673	Sense
Y67D8C.5	chrIV	-	3032725	3049968	6.17e-11	6	9.35	1.93e-18	Sense	Inverse
3R5.1	chrIII	+	13780107	13781013	0.00683902	1	10.2	0.00683902	Antisense
F59E10.1	chrII	+	10873852	10877779	3.42e-07	3	10.87	3.42e-07	Antisense
ZK430.7	chrII	-	4422616	4424885	0.000587972	0	11.21	2.59e-13	Sense
Y46G5A.1	chrII	+	12694319	12725391	9.08e-06	2	11.72	0.0172552	Sense
C55B7.4	chrI	+	6497439	6499561	0.00164957	1	12.23	0.000365039	Sense
T22F3.3	chrV	+	3579043	3585036	0.00164957	1	12.23	2.42e-08	Sense	Inverse
Y67D8C.10	chrIV	-	3103816	3131366	4.17e-06	2	12.74	0.00541783	Sense	Inverse
M106.4	chrII	-	10863614	10868730	9.51e-05	1	17.33	0.0207649	Sense	Inverse
Y39B6A.2	chrV	+	19190510	19198887	7.23e-06	0	17.33	0.00541783	Sense	Inverse
C16A11.2	chrII	+	4238166	4244823	3.61e-05	1	18.35	1.87e-13	Sense
3R5.1	chrIII	+	13780107	13781013	8.95e-07	0	20.39	0.00683902	Sense
K12D12.4	chrII	-	11863440	11865373	5.98e-09	0	28.55	4.49e-05	Sense
C24H12.12	chrII	-	433657	435405	2.1e-10	0	32.62	2.1e-10	Antisense
F59E10.1	chrII	+	10873852	10877779	8.01e-13	0	40.78	3.42e-07	Sense

## Sheet: Overlap
Endo-siRNA locus	adr-1 Sense	adr-1 Antisense	adr-2 Sense	adr-2 Antisense	adr-1;adr-2 Sense	adr-1;adr-2 Antisense	K39A Sense	K39A Antisense	Annotated 26mer Locus	Drh-3 Regulated
E01G4.7		-1.37		1.65	-1.35		-180.95	-17.15	Y
F39E9.7	-1.28		1.48	1.78			-143.97	-34.02	Y
W04B5.2		-1.28	1.61	1.94		1.55	-114.39	-29.91	Y
F39E9.6	-1.25		2.38	1.71	1.85		-82.83	-6.9
F55C9.3				1.88			-69.52	-17.76	Y
C44B11.6	-1.49		1.87	1.2		1.22	-42.91	-44.08	Y
T16A1.8			2.11	1.58			-35.51	-37.31	Y
T05E12.8				1.37	-2.33	-1.52	-35.51	-8.88	Y
F55C9.5	-2.04			1.55	-1.41		-34.22	-5.18	Y
H16D19.4	-1.37						-32.55	-2.85	Y
Y37E11B.2	-1.47	-1.25		1.69			-23.92	-89.74	Y
K02E2.6	-1.32	-1.41	1.75	1.8			-23.19	-39.77	Y
C40A11.10	-1.79		1.37	1.76			-20.22	-37.23	Y
Y116A8B.1		-1.32	-1.3	1.49	-1.85		-18.26	-13.48	Y
F39E9.1	-1.27					4.08	-18.26	-13.33
Y82E9BR.20	-3.33	1.48		1.94			-18.26	-11.84	Y
Y105C5A.14				1.21	-1.33		-16.52	-5.62	Y
C01A2.1	-1.56		1.5	2.08		1.24	-16.52	-3.82	Y
W04B5.1		-1.27		1.66			-15.79	-15.29	Y	Y
Y37D8A.2	-2.94						-15.79
Y43F8B.9			3.09	1.5			-13.33	-42.91	Y
Y17D7B.4				1.38			-13.33	-28.12	Y
Y59A8A.1	-8.33						-13.33
Y7A5A.8	-5						-13.33
K07A1.12				-5.88		-2.78	-13.33
R06F6.8						-6.67	-13.33
Y116F11A.1	-1.64	-1.47		2.03	-1.96		-10.86	-30.74	Y
W05H12.2				1.69			-10.86	-8.88	Y
E02H9.6	-1.39		2.44				-10.86	-8.4
C07G1.3		-2.13		-2.38		-5.56	-10.86
ZK370.3		-2.04				-6.67	-10.86
T07F8.3				-2.08		-3.03	-10.86
T26A5.3				4.76			-10.86
Y41D4A.5					7.14	-2.56	-10.86
Y49E10.3						-11.11	-10.86
Y47D3A.15						-3.7	-10.86
K10B2.5						-2.17	-10.36	-2.29	Y
ZK430.1		-1.85		-2.27		-6.25	-9.13	-3.19
F43G6.1						-3.45	-9.13
T20G5.1				-2.17		-3.13	-8.88
F31A9.2		-1.2				-2.08	-8.4	-12.83	Y
Y37D8A.11						-2.94	-8.4	-5.43
W08D2.7						-5.88	-8.4	-2.85
Y51H1A.4		-1.35				-2.7	-8.4	-2.26
F54D10.3		-2.13					-8.4	-1.97		Y
F38B7.5	-2.33	-1.35		-1.92		-2.44	-8.4	-1.8
F15D4.1	-3.03	-1.59				-2.17	-8.4	-1.62
R09B3.4	-20	-1.39				-4	-8.4
R05H5.3	-9.09						-8.4
F10E9.4	-7.14	-1.75					-8.4
K02B12.7	-6.25					-16.67	-8.4
C04F12.9	9					-4.35	-8.4			Y
Y41C4A.4		-2.33					-8.4
D2013.9		-1.92		-2.5			-8.4
Y41E3.16		-1.85					-8.4
Y53G8B.1		-1.61					-8.4			Y
T24H10.1		-1.52					-8.4
F44D12.8		-1.25					-8.4
Y102A5C.36				-11.11		-12.5	-8.4			Y
H19N07.1				-2.7		-4.55	-8.4
T01G1.3				-1.64		-5.56	-8.4
F27C1.6					-2.78	-2.94	-8.4
F17C11.7						-6.67	-8.4
F54C4.3						-6.25	-8.4
Y47H9C.7						-5.26	-8.4
F07F6.4						-5	-8.4
Y53C12B.3						-4.55	-8.4
T03F6.5						-2.78	-8.4
C50F4.11				-2.17		-4.76	-7.9	-3.45
K06H7.6		-2.44					-7.9
F26E4.1		-1.49				-4.55	-7.9
C38D4.3		-1.59		-1.69		-3.13	-7.73
K08B12.5				-14.29			-6.91	-3.95
C18D11.4		-1.45					-6.66	-3.95
W08E12.7				-3.23		-4.35	-6.66	-3.42
T04C9.1		-1.22				-4.17	-6.66	-2.18
F44B9.4				-5.88		-5.88	-6.66
ZK863.3				-4		-14.29	-6.66
F26A3.8						-6.67	-6.66
F57B10.12						-2.22	-6.66
T25G3.2		-1.89				-6.25	-6.41
Y41D4B.19				-1.89		-2.86	-6.09	-9.13
F32D1.1				-1.69		-4.17	-6.09
F54D5.9						-5	-6.09
K07C5.4				-1.89		-2.5	-5.8	-3.86
F54E7.2	-2.33						-5.8
K12H4.8				-3.03		-2.44	-5.77	-9.3
C32E8.2				-4		-2.78	-5.43	-1.97
Y116A8C.36		-1.27		-2.33		-2.7	-5.43	-1.84
Y50D7A.7					6.12		-5.43	-1.75		Y
ZK792.5	7.36						-5.43
ZK809.5		-1.59				-9.09	-5.43
C16A3.8		-1.54					-5.43
Y48C3A.14		-1.49				-10	-5.43
F55A12.7		1.46					-5.43
Y38C1AA.7		1.57				3.57	-5.43		Y
C08H9.3				-5		-4	-5.43
F01F1.8				-4.55		-7.69	-5.43
T19E7.3						-6.67	-5.43
C47B2.4						-5.56	-5.43
F39E9.10			1.64	1.96		1.21	-5.35	-6.14
Y66D12A.3	-2.38						-5.26	-6.66	Y
F25B5.2		-1.82		-2.63		-2.86	-5.26	-2.39
F11H8.4	-3.13			-2.08		-3.03	-5.26	-2.11
F53G12.5	9			-3.7			-5.26
F46B6.6				-4.17		-5	-5.26
Y48G1A.5				-2.86			-5.13
Y62F5A.1					8.5		-5.1			Y
C09B9.3	2.19						-4.8
Y43B11AR.4				-1.96		-3.45	-4.72
T13H2.5	9					-3.45	-4.69
F56C9.6	-2.08			-5.56		-3.23	-4.64	-3.4
Y73B6BL.6		-1.32		-5.26		-3.03	-4.64
F23C8.6						-10	-4.64
Y41E3.11		-1.92			4.59	-3.33	-4.56	-1.72
R151.3						-2.78	-4.5
H09G03.1	-1.69	-1.85					-4.44	-22.69	Y
T01C8.5						-1.69	-4.44	-2.31		Y
C33H5.4	-1.69	-1.52		-2.94		-4.76	-4.44
M18.7	10	-1.67					-4.44
C53H9.1		-1.49					-4.44
F52G2.2		1.63			5.1		-4.44
D1054.3	-2.13	-1.82					-4.37
C07G2.2				-1.92		-10	-4.37
F21G4.2		-1.41		-2.56	-2.63	-4.55	-4.29	-1.8
Y75B12B.2						-2.44	-4.29
F28H1.3		-1.35		-2.7		-4.55	-4.28	-1.93
D1044.6				-2		-5	-4.28
Y66H1B.2						-4	-4.28
C48G7.3				-2.27		-2.38	-4.22
T07C4.3				-1.54		-2.13	-4.14	-1.99
F23F1.8				-2.5		-7.14	-4.14
Y110A7A.18				-2		-2.86	-4.02	-3.04
T23G11.3		1.34		-1.96		-3.13	-4.02
F32D1.10		-1.54		-1.79		-3.33	-3.95
K08D12.1		1.34		-1.82		-2.22	-3.95
C01G5.2				-2.27		-4.17	-3.95
F57H12.1				-2.22		-4.76	-3.95
Y53C10A.12				-2.17		-5	-3.95
Y53C12A.1				-2.13		-3.03	-3.95
F20H11.1						-4.76	-3.95
C09D4.5				-14.29		-5.88	-3.86
F46F11.9				-1.82		-3.23	-3.68
Y67D8C.10	8.05				12.74		-3.66			Y
T19B4.2		-1.3				-3.85	-3.65	-3.06
T05C12.7	-3.45	-1.43				-3.13	-3.65
C24H11.7				-2.38		-2.78	-3.65
Y43F8C.7						-5	-3.65
Y48G1C.7		1.44				-5.56	-3.62
W10C8.5		2.81					-3.62
F53F4.11				-1.92		-2.5	-3.62
K02C4.3						-10	-3.62
C17H12.1						-7.14	-3.62
Y113G7B.17						-6.25	-3.62
D1054.15						-4.35	-3.62
Y71F9AL.13	-5.26						-3.51
C49H3.11	12	1.29		-2.63		-4.76	-3.51
C12D8.1				-2.33		-3.13	-3.51
T24B8.7				-2.08		-5	-3.51
ZK370.4						-5.26	-3.51
T05E11.3		-1.41				-5	-3.45
T06E4.3				-2.04		-3.57	-3.45
F13B10.2	1.66			-3.57		-4.17	-3.34
F59E12.9	8.23			-2.7		-3.45	-3.33
T04H1.2	9					-6.67	-3.33
F55F8.2				-4.17		-3.23	-3.33
H37N21.1				4.76			-3.33
T24B8.1	-5.26			-3.33		-2.94	-3.31
C47D12.6	-2.22					-2.44	-3.31
F42C5.8				-10		-4	-3.31
C38C10.4				-4.17		-8.33	-3.31
M01E11.5						-3.33	-3.31
D1007.12						-4.35	-3.3	-3.33
R31.1				-7.69			-3.3	-2.11
T08G11.1				-2.17		-4.35	-3.3
F36D4.3		-1.54		-1.82		-4.55	-3.23	-1.48
ZK546.13	1.64						-3.21
Y67D8C.5	-1.35			-2.38	9.35	-3.45	-3.16
C18H7.1	6.49						-3.16
Y37D8A.13				-12.5		-4.17	-3.16
T05C3.5				-2.7		-3.13	-3.16		Y
Y51H4A.12				-2.5		-5.26	-3.16
C26D10.2				-1.85		-3.23	-3.16
T19E10.1						-2.13	-3.16
F25H2.10		-1.23				-3.57	-3.12
C06A1.1				-2.08		-3.7	-3.12
K11C4.3	-1.41						-3.09	-5.43
D1046.1	-2.17	-1.75		-4.55			-3.07	-3.65
ZK250.5	-2.04						-3.06
T22D1.9				-2.44		-2.63	-3.06
K09B11.9	-2.33			-2.22		-4.17	-3.04	-6.66
Y48G1C.1	2.2	-1.22		-1.72		-4.35	-3.04	-1.94
Y113G7B.18						-4	-3.04
K12D12.1		-1.32		-1.96		-3.7	-3	-1.87
F22D6.2						-6.67	-3
F17C11.9				-2.44		-2.5	-2.98		Y
F20D12.1	-1.45	-1.2	-2.33	-2.63	-2.22	-5.88	-2.96	-1.29
T06D8.8				-1.79	-5	-2.78	-2.96
R08C7.10						-6.25	-2.96
C04A2.7						-2.38	-2.96
C47E12.5	-2.04						-2.94
K11H12.2						-4	-2.94
D2096.8				-4.17		-3.13	-2.92
M106.4	4.69			-2.04	17.33	-11.11	-2.9
ZK994.3		-2.04					-2.9
T22B11.5		1.35				-3.13	-2.9
F43E2.8						-5.26	-2.9
C10H11.10				-2.17		-4.55	-2.89
C14C10.3						-10	-2.89
Y92H12A.2	-1.92						-2.88
Y55D5A.5	3.61						-2.85			Y
K01G5.7				-1.92		-3.7	-2.85
H02I12.1	1.98			-1.61		-2.13	-2.8	-2.34
C28C12.2		-1.32		-1.32	-4.55	-2	-2.73	-2.17
F56F3.1	3.75			-3.33		-2.56	-2.71
C15H11.3	-2.63			-1.79		-4.76	-2.63
T08B2.7				-9.09		-9.09	-2.63			Y
C37H5.6				-2.38	7.14	-6.67	-2.63
ZK418.8						-10	-2.63
Y37E3.8	-3.57						-2.62
F10G7.8				-5		-12.5	-2.61
F44E2.2	1.97	1.4	-2	-3.57	-2.13		-2.59	-2.75		Y
T01E8.5	-1.37			-1.69	-5	-4.76	-2.59
F20D12.4						-5.26	-2.59
K01G5.4						-2.94	-2.58
M117.2				-1.85		-2.63	-2.57	-2.34
T11F8.3	4.76	-1.67		-2.22		-4.76	-2.57	-1.97
Y18D10A.17	3.54			-2.04		-3.23	-2.57	-1.73
C26C6.1		-1.3				-4	-2.57
C56C10.8		1.78				-2.44	-2.56		Y
E01A2.6				-2.56		-3.13	-2.56
Y17G7B.20				-1.82		-3.23	-2.56
C47D12.1				-1.59		-3.23	-2.56
F56D12.5	3.46	1.27		-1.69		-3.13	-2.55	-2.31	Y
F14B4.2						-9.09	-2.55
T27E9.1		-1.72				-3.45	-2.54
F59A2.1				-2.38		-2.78	-2.53
Y38F2AR.12	3.03						-2.5			Y
K07H8.6		6.49			-5		-2.49
C23G10.3						-3.57	-2.41
F31E3.5	2.19	1.37					-2.38		Y
F37C12.9						-12.5	-2.38
F58E10.3				-3.33		-4.76	-2.37
Y17G7A.1				-2.44	-4.35	-3.7	-2.36	-1.95	Y
K07F5.5		3.03					-2.35		Y
C47E8.5	3.03			-2.27		-3.7	-2.33		Y
F54H12.6					-11.11	-7.69	-2.33
C05B5.2	-9.09						-2.32
Y76A2B.1				-1.64		-5	-2.32
C10C6.6				-2.5		-5	-2.31
F28B3.7				-4.35		-6.25	-2.3
F20H11.2				-2.7		-4.76	-2.3
F20C5.3				-2.13		-2.94	-2.3
C07G2.1		-1.56	4.76		8.16	-2.27	-2.25	-3.12
F42A6.7						-2.33	-2.25
K02B2.5		1.71	5.94				-2.22
B0041.4	14					-6.67	-2.16
T21E12.4		-1.32		-2.7		-3.57	-2.12	-2.61
Y69A2AR.31			-3.33		-2.78		-2.11	-3.5		Y
R166.5	-2.56			-2	-2.5	-2.17	-2.11
R05D3.7	-2.33			-1.69		-5.26	-2.11
C53D5.6				-2.86		-3.57	-2.11
B0280.5	2.6					-1.89	-2.1
C23G10.4		-1.54		-1.82		-3.13	-2.09	-1.68
Y54E10A.9				-2.5		-4.17	-2.09
Y106G6H.2				-1.92		-4.76	-2.06
Y39G10AR.13				-2.5		-3.85	-2.01	-1.96
C42D8.2					-3.33		-1.97
C34D4.14				-3.13	4.59	-4.35	-1.94
C07H6.5	-1.67			-2.86		-7.14	-1.93
H27M09.3	1.9			-3.23		-4.55	-1.91	-2.11
F54C9.1						-3.7	-1.9	-4.04		Y
K07H8.10					-5		-1.88
F25H5.4						-3.23	-1.87
ZK381.4				-2.27		-5.56	-1.84	-2.71
Y53F4B.9	-1.45			-1.96		-3.85	-1.81
F26D10.3		-1.32		-1.61		-5.88	-1.8	-1.75	Y
F55G1.10	-2.33						-1.79
Y34D9A.4	1.92					-2.5	-1.78	-2.63
C08H9.2		1.24		-1.72		-2.56	-1.76
M01E11.6				-1.85	-2.94	-4	-1.68	-2.66
F20G4.3						-6.25	-1.42	-4.69
F43E2.6	2.48	2.88	1.2	1.68	1.85	2.45	-1.4	-2.21
T27E9.7						-6.25	1.93
F52H3.6	-7.14						12
E01G4.5		-1.72		1.53				-62.63	Y
R12E2.1				-4.76		-2.78		-15.79
C37H5.5		-1.79		-3.57		-3.45		-13.33
C55B7.5	-11.11	-2.17		-5.88				-10.86
T25B9.9	-5.26							-10.86
F26H9.7		-3.7						-10.86
T03F6.3		-3.13						-10.86		Y
Y16E11A.1		-2.22						-10.86		Y
Y56A3A.15		-3.23						-9.13		Y
F52D2.6		-1.3		1.56	-1.43	-1.52		-9.07	Y
Y105E8A.20	-25							-8.4
F55A3.2	-11.11							-8.4
F36D3.1	-9.09							-8.4
Y18D10A.16	-6.25			-11.11		-6.25		-8.4
D1022.7	-2.86					-9.09		-8.4
C56A3.5		-4.35						-8.4
H38K22.3		-4.17						-8.4
B0205.5		-2.56						-8.4		Y
F31A9.4		-2.5	-1.56		-2.86	-1.27		-8.4	Y
C45G9.2		-2.44						-8.4
ZK909.4		-2.33						-8.4		Y
C01G10.1		-2.04						-8.4
F15A4.11		-1.89						-8.4
T24B1.1		-1.67						-8.4
Y119D3B.8		-1.52						-8.4		Y
F52D2.8		-1.43		1.66	-2.08			-8.4	Y
C34C12.1		-1.43						-8.4		Y
C16C2.4		1.64						-8.4
ZK632.9		2.81						-8.4
ZK520.5		3.28						-8.4
T20B12.3				-5.56				-8.4
Y116A8C.35				-2.94		-3.45		-8.4
F52G3.3						-5		-8.4		Y
F07G6.6						2.04		-8.4
F59D12.2			1.57	2.85				-8.05		Y
F53F8.6		-1.33						-7.97		Y
F54D8.6		-2.04						-7.9
Y6B3A.1				-1.82		-2.86		-7.83
F29G9.2		-1.33		-2.08		-2.94		-7.73
K08F11.1		-1.59		-4.55		-2.22		-7.54		Y
T08B2.5				-2		-4.76		-7.03
ZK1128.7		-7.14						-6.91		Y
F44G4.1	-7.14	-1.56				-7.14		-6.66
C39B5.2		-1.75	2.52	12.48		8.92		-6.66
F42G8.4		-1.69						-6.66		Y
C50A2.2		-1.64						-6.66
Y45G12B.1		-1.27						-6.66
F36A2.1				-5		-4		-6.66
M03C11.7				-3.85		-4.55		-6.66
C44B9.4				-2.94		-14.29		-6.66
F10B5.6				-2.94		-3.45		-6.66
Y55F3AM.12				-2.5		-2.94		-6.66
C15C6.4						-7.69		-6.66
T05A10.1						-7.69		-6.66
Y37E11B.3						-6.67		-6.66
T05F1.13		-1.89						-6.41		Y
F22B5.1		-1.67				-4		-6.09
F45D11.10		-1.37						-6.09		Y
ZK180.4						-5		-6.09
F45E12.3						-4		-6.09
Y71A12B.9						-2.38		-6.09
C08F8.3		-1.56				-10		-5.92
C30C11.1		-2.33				-7.69		-5.8
Y59A8B.1						-2.94		-5.8
F28D9.1				-1.75		-2.38		-5.78
Y41D4B.4		-1.56				-2.22		-5.62
ZK402.3		-1.22						-5.62	Y	Y
F58B3.6		-1.61				-2.94		-5.51
T12E12.4		-1.27				-5.26		-5.51
C37A2.2				-6.25		-3.7		-5.51
R07E5.14	-9.09							-5.43
C27A2.1	-5	-1.35				-5.26		-5.43
F53E10.6	-2.63							-5.43
W01B6.5		-3.85						-5.43
Y95D11A.1		-3.03		-6.67		-7.69		-5.43
T26A5.2		-1.79		-11.11				-5.43
Y47G6A.11		-1.69				-10		-5.43
T14B4.2		-1.59						-5.43
R07H5.2		-1.49		-3.85		-3.57		-5.43
C05C8.2				-10				-5.43
C01F1.2				-3.23		-20		-5.43
C16C10.6						-7.69		-5.43
C50C3.1		-1.59				-11.11		-5.42
Y39B6A.2	4.76			-3.33	17.33	-5.88		-5.26
R06C7.9		-250.34				-5		-5.26
D2030.8		-1.39				-2.78		-5.26
T25G12.11		1.3		1.67				-5.26	Y
Y39B6A.35				-2.33		-4.35		-5.26
F28C6.8		-3.7						-5.18
E02H1.3		-1.59						-5.18
K08D10.12				-7.69		-4.35		-5.18		Y
T08B2.9				-2.27		-14.29		-5.13
Y39E4B.8	-9.09	-2.63						-5.1		Y
Y23H5B.3		-2.63						-5.07		Y
C27F2.1		-1.41						-4.78		Y
T06G6.9		-1.67						-4.64
W01A11.2				-2.5		-4.35		-4.64
JC8.6						-5		-4.64
C27H6.3		-2.5		-10		-5		-4.56
Y34D9A.3		-2.04						-4.56
T27B7.6		-1.54						-4.56		Y
Y47D3A.29		-1.67		-2.08		-4		-4.54
F28D1.10		-1.61		-2.27		-5		-4.54
M03C11.8						-3.13		-4.49
T23D8.3	-3.85							-4.44
Y52B11A.10	-2.94	-1.96						-4.44
Y110A2AL.1		-5.88						-4.44
K11H3.3		-3.45						-4.44
Y111B2A.12		-2.44			6.12	3.06		-4.44
F18A1.4		-2.17						-4.44		Y
ZK1067.8		-2.17						-4.44
D2013.8		-1.47		-2.22		-20		-4.44
Y73B6BL.4		-1.47						-4.44
M03A1.1		3.53				2.83		-4.44		Y
F14D2.9				-5				-4.44		Y
W09G10.4				-4.17		-4		-4.44
T02C12.3				-3.57		-8.33		-4.44
F44B9.6				-2.86		-4.17		-4.44
F15D3.6						-9.09		-4.44
F56B3.8						-9.09		-4.44
F30A10.9						-7.14		-4.44
B0547.1						-5.26		-4.44
W03G9.4						-4.17		-4.44
Y111B2A.11				-3.03		-2.78		-4.29
F54D11.4		-2.63				-5		-4.28
Y39A1A.15		-1.64				-2.94		-4.28
W09D10.1				-2.13		-7.69		-4.28
F58D5.3		-1.35						-4.25		Y
T22C1.10		-2.38						-4.14		Y
C43H8.2		-2.08						-4.14		Y
F33H2.1						-4		-4.14
C18D11.2	-7.14							-4.13		Y
Y104H12D.3		-1.54				-3.57		-4.13
F52C12.4		-1.52	3.57		3.51	-9.09		-4.13		Y
F47D12.4		-1.69				-3.23		-4.02
F44F1.7		-1.75						-3.95		Y
R09A1.1		-1.75						-3.95
B0303.9		-1.41		-3.33		-2.22		-3.95
F42A10.5				-7.69		-7.69		-3.95
F14E5.2				-6.67				-3.95
F41H10.11				-5				-3.95
F17C11.10						-5.26		-3.95
F26H9.1						-3.57		-3.95
M03A1.6						-2.94		-3.95
Y105E8A.28						-2.86		-3.9
Y60A3A.12				-3.13		-4.35		-3.87
F54C8.2		-2.22		-4		-20		-3.86
B0464.5		-2.08				-5.88		-3.86
F53F4.12		-1.72		-3.23		-4.76		-3.86
T01C3.9		-1.35				-12.5		-3.86
Y48G9A.8						-4		-3.86
Y71A12B.17		-1.64						-3.77		Y
Y22D7AL.5	5.3		-3.33	-2.22	-2.94	-4.55		-3.74
ZC308.1				-2.5		-3.45		-3.69
M110.4				-2.13		-2.78		-3.69
C07D10.5		2.29						-3.68		Y
B0047.1						-1.85		-3.68		Y
R06A4.9						-5.26		-3.67
F13H10.5		-1.52						-3.66		Y
W04A4.5		-1.33						-3.66
Y59A8B.13				-4.17		-7.14		-3.66
W03G1.6				-2.94		-4.55		-3.66
Y55F3BR.8						-3.45		-3.66
ZK484.5		1.35						-3.65	Y
Y66D12A.9				-4				-3.65
K02F2.4						-4.35		-3.65
F26E4.9	2.53							-3.62
Y44E3A.1		-5.26						-3.62		Y
F53A2.8		-2.38						-3.62
C04G2.6		-2.27						-3.62
Y49F6C.4		-2.22						-3.62		Y
Y57A10A.2		-2.04						-3.62
T16H12.1		-2						-3.62
K09B11.2		-1.96						-3.62
F02H6.4		-1.92						-3.62		Y
C39B5.6		-1.82						-3.62
T24C4.1		-1.79						-3.62
F59E12.1		-1.54		-2.38		-2.44		-3.62
T28A8.5		-1.35				-7.14		-3.62
H27M09.2				-7.14				-3.62
W03F9.5				-4.17		-3.23		-3.62
C35E7.8						-5.88		-3.62
C28H8.4						-4		-3.58
W05F2.5		-2		-6.67				-3.57
Y75B8A.19	-16.67	-1.59						-3.55		Y
Y77E11A.3		-1.32						-3.54		Y
F36D4.5						-3.57		-3.51
W02B12.3		-1.23		-1.96		-3.45		-3.49
C44C1.1		-2.63				-7.69		-3.45		Y
F18E9.5		-1.92				-3.57		-3.45		Y
Y46G5A.2		-1.61						-3.45
C05D2.5		-1.37		-2.86		-2.63		-3.45
Y71G12B.9		-1.35						-3.45
C07G1.4		1.31				-2.33		-3.45
Y39G10AR.18				2.38				-3.45
F53A3.4						-4.17		-3.45
T22H9.2						-3.57		-3.45
Y51H7C.11						-2.22		-3.45
F18E2.4		-2						-3.42		Y
Y63D3A.5				-1.43		-2.33		-3.41
D2096.3		-3.45						-3.4		Y
M01G5.1	-8.33							-3.33
Y41D4A.3		-2.44						-3.33		Y
W09B6.2		-2.13				-10		-3.33
H06I04.1		-2.04						-3.33
W01D2.5		-1.96						-3.33
C35B1.2		-1.75						-3.33
ZK1307.9		-1.72						-3.33		Y
ZK909.3		-1.56						-3.33		Y
Y110A7A.5		-1.43						-3.33
F54F11.3				-7.14				-3.33
T12D8.7						-7.14		-3.33
C05D11.2						-4.35		-3.33
Y47H10A.5	3.68	1.49						-3.32		Y
C43E11.8						-4.55		-3.31
Y48B6A.1						-3.03		-3.31
F42G9.1	14							-3.3
Y49F6C.5		-2.5						-3.3		Y
R06A4.2		-1.82				-2.56		-3.3
T28D9.2		-1.79						-3.3
F53A2.4						-2.56		-3.3
Y48B6A.3		-1.79		-1.89		-4.55		-3.26
Y82E9BR.2		-1.43				-2.04		-3.24
Y71H2B.11		-2.63						-3.23		Y
F33C8.1		-2.44						-3.23		Y
F25D7.4				-1.82		-4.17		-3.23
R07B7.2						-2.94		-3.23
ZK484.2		-1.92			-6.67			-3.21
F44G4.4		-1.32		-9.09		-3.57		-3.21
Y48G1A.4		-1.32				-9.09		-3.21
F54D11.2		-1.3				-2.04		-3.21
T12F5.3				-2.94		-5.26		-3.19
Y67H2A.4	-16.67					-3.57		-3.16
W03F9.10	-3.23	-1.41				-4.17		-3.16
Y95B8A.4	-2.78	-1.45				-7.14		-3.16		Y
ZK945.3		-2.08				-4.35		-3.16
H05C05.1		-1.75						-3.16
W02G9.5		-1.69		-5.88		-6.67		-3.16
R05H10.2		-1.67				-2.94		-3.16
T13F2.6		-1.61		-8.33		-5		-3.16
C03A7.2		-1.45		-5				-3.16		Y
Y18D10A.13		-1.22		-1.92		-3.85		-3.16
W08G11.3				-7.69				-3.16
T10C6.5				-7.14		-6.67		-3.16
R06A10.2		-1.85						-3.15		Y
ZK355.2		-3.13						-3.14		Y
Y54F10AL.2		-1.49				-3.13		-3.12
W07G4.4		-1.39						-3.12
C16C10.11		1.66		-2.63		-4		-3.12
F01G4.4	-1.64	-1.23		-2.38		-5.88		-3.07
R144.7			4.76	-2.27		-1.96		-3.06
Y57G11C.11	13			-2		-4.17		-3.04
Y39E4B.1		-2.17						-3.04
K08E3.3		-1.56						-3.04
C41D11.2				-7.69				-3.04
F49D11.10				-2.38		-14.29		-3.04
F54C8.4				-1.82		-3.57		-3.04
C18E9.3						-3.7		-3.04
Y57G11C.10						-2.08		-3.04
F59A2.3				-1.72		-3.33		-3.02
F38A5.2	-6.67			-2.44		-3.45		-2.96
Y75B8A.22	-4.17			-1.72		-2.17		-2.96
H35N09.2	3.9		1.92		4.55			-2.96		Y
R144.9		-2.56						-2.96
F12F6.1		-1.82				-5		-2.96
Y48G8AL.6		-1.82						-2.96
T27C10.3		-1.41						-2.96
K05C4.7		-1.28		-2.22				-2.96
D1054.2				-4.55		-3.13		-2.96
F13A7.14				-3.13		-5		-2.96
R09B3.3						-4.55		-2.96	Y
F58A4.7		-1.54						-2.94		Y
F15E6.1				-1.39		-3.85		-2.94
ZK185.2	1.59	1.37				1.69		-2.93		Y
F53G12.7		-3.13						-2.9
Y39G10AR.21		-1.67		-3.33		-6.67		-2.9
R01B10.5				-2.27		-2.94		-2.9
R06C7.1		-1.35	4.76			-2.94		-2.89
B0212.3		-2.78						-2.88		Y
ZK1098.8				-3.33		-4.76		-2.86
C44C10.5		-1.85						-2.85		Y
C01A2.6		-1.82						-2.85		Y
W03G9.3		-1.67				-2.94		-2.85		Y
Y54E2A.12		-1.47				-4		-2.85
Y48G8AL.5		-1.45				-12.5		-2.85
F25H2.5						-2.63		-2.85
K08A2.1						-2.27		-2.85		Y
F54E12.2				-2		-3.03		-2.84
C36B1.8		-1.89						-2.81
W03D8.7		-1.82						-2.81		Y
K10G6.3		-1.47				-4.76		-2.81
T07D4.4		-1.41		-1.92		-4.55		-2.81
F23B12.8				-2.94		-4.17		-2.81
R119.4				-2.22		-3.57		-2.81
Y45F10A.2				-1.96		-12.5		-2.81
F18A11.2		-1.23						-2.79		Y
T22A3.8		-2.17						-2.78		Y
F29C12.5		-1.89		-2.08		-3.33		-2.78		Y
ZK632.1		-1.72				-2.04		-2.78
D2045.2				-1.82		-2.78		-2.78		Y
T22F3.3	4.04	-1.47			12.23	-1.47		-2.77
Y67D8C.6						-3.57		-2.76		Y
R119.6		-2						-2.75
Y39B6A.33		-1.67		-2.5		-2.94		-2.75
Y23H5B.6						-5		-2.75
C29E4.2		-1.96				-3.23		-2.73
R09G11.2		-1.49						-2.73		Y
R06C7.8		-1.37		-2	-12.5	-3.45		-2.73
C04A2.3		-1.28		-2		-3.33		-2.73
Y40B10A.8				-2.08		-2.94		-2.73
Y17G9B.9				-1.79		-4		-2.73
C33E10.2		-1.96						-2.7		Y
T05G5.7		-1.45		-1.92		-4.17		-2.7
D2005.4		-1.43		-2.63		-3.7		-2.7
F09G2.2		-1.27		-2.94		-3.13		-2.7
ZK1055.1			-2.22	-2.7	-2.04	-4.55		-2.7
W04A8.6		-1.89						-2.69		Y
C52B11.2		-1.45				-9.09		-2.69		Y
C52E2.6	-7.14					-1.82		-2.66		Y
T19H12.2		-1.28	-4.17	-1.75	-7.14	-4.55		-2.66
F52C9.7	-3.23					-11.11		-2.63
Y71G12B.13	10			-3.13		-7.14		-2.63
B0273.2		-2.33						-2.63
R01H10.8		-2.13				-12.5		-2.63
C41A3.1		-1.72						-2.63		Y
T14B4.1		-1.54				-10		-2.63
ZK430.2		-1.54						-2.63
C06H2.2		-1.47						-2.63
Y37E3.9		-1.45						-2.63
ZK637.8		-1.2		-2.27		-5		-2.63	Y
R12E2.2				-6.67		-4		-2.63
T10B5.5						-11.11		-2.63
C28H8.3						-3.13		-2.63
T23G7.1		-1.59		-2.22		-6.67		-2.61
C54G10.3		-1.45		-2.94		-4.17		-2.61
F54A3.3		-1.3						-2.61
Y40B1A.3				-5.88		-5.88		-2.61
F39B2.1						-2.56		-2.61
T25E12.4		-1.64						-2.59
K10F12.3		-1.43						-2.59		Y
F22B5.2		-1.3						-2.59
K04F10.7				-2.33		-8.33		-2.59
C05C10.5		-2.33						-2.58
ZC53.6		-2.22				-12.5		-2.58		Y
Y45F10A.3	-11.11	-2.94						-2.57		Y
M05D6.7	-7.14							-2.57		Y
F55D10.3		-1.92				-7.69		-2.57		Y
T05A6.2		-1.61		-3.33		-3.33		-2.56
C15C6.3				-3.33				-2.56
K05C4.2				-1.96		-5.26		-2.56
C24A1.2		-3.03						-2.55		Y
Y32G9A.2		-1.75						-2.55		Y
C14C10.5		-1.35		-2.63				-2.54
F44A2.1		-1.23				-3.13		-2.54
Y38A8.3				-2.33		-5.56		-2.54
F01F1.6		-1.61		-2.5		-4.55		-2.53
C04D8.1				-2.33		-2.7		-2.53
F55F10.1		-1.89		-3.33	-5	-5		-2.52
F53F10.5			-5		-5	-3.33		-2.52
R148.3				-3.33		-4.17		-2.52
C41G7.2		-1.92		-2	-6.67	-3.23		-2.51
C16A3.7		-1.49				-2.56		-2.51
R144.4		-1.35				-2.04		-2.51
C46C2.3	-5.88	-1.41						-2.5		Y
Y45G5AM.2		-1.41		-1.54		-3.7		-2.5
T26A5.5				-2.22		-3.03		-2.5
T05A7.4		-1.64						-2.47
C05H8.1						-2.22		-2.44		Y
C04G2.10		-1.75				-7.14		-2.42		Y
R06A4.6		-1.69						-2.41		Y
Y65B4BL.2		-1.41		-2.33		-2		-2.41	Y
F26F12.7		-1.39		-1.67		-4.35		-2.41
Y18D10A.19				-2.44		-4		-2.4	Y
C47G2.5		-1.59		-2.22		-4.76		-2.39
Y71A12B.11		-2.27						-2.38		Y
Y48G1C.5	-3.85							-2.37		Y
C29E4.4		-1.72	-5.88	-2.27	-5.88	-2.27		-2.37
F32H2.1		-1.69		-3.03		-2.22		-2.37
Y111B2A.14		-1.45		-1.92		-4.17		-2.37
C50F2.2		-1.22		-2.38		-3.7		-2.37
K08B4.5	-2.63							-2.35		Y
F59C12.4	1.88		4.76	-1.64		-1.92		-2.35		Y
R02D5.1		-2.22						-2.35		Y
D1043.1		-1.89		-2.5		-2.13		-2.35
Y111B2A.3		-1.2		-2		-3.85		-2.35
Y48E1A.1				-1.85		-3.33		-2.35
AH6.5						-3.57		-2.35
F53G12.4		-1.67						-2.34		Y
R11A8.1						-1.96		-2.34
C32B5.6		-2.78						-2.33		Y
Y39A1B.3		-1.39		-2.38		-2.38		-2.33
Y55B1BR.2						-3.23		-2.33
Y39G8C.1		-1.72				-7.14		-2.32
ZC395.3		-1.52			-6.67	-2.94		-2.32
R11A8.6		-1.47		-2.63		-3.7		-2.32
F26B1.2				-2.5				-2.32
T02E1.3				-2.27		-3.7		-2.32
C39E9.12	-1.67	-1.35		-1.92		-4.35		-2.31
K03E5.1		-2.63						-2.3		Y
K01C8.3		-1.64		-4.76		-5.56		-2.3
C09H6.1		-1.45				-2.86		-2.3
K09H11.3				-1.89		-3.85		-2.28
H05L14.2		-1.35				-3.13		-2.27
C15C6.1		-1.85						-2.26		Y
H04J21.3				-2		-3.33		-2.26
W02A2.7		-1.67		-4.55		-4		-2.25
T22F3.2				-2.13		-4.76		-2.25
F33E11.1		-1.61						-2.24		Y
T10B5.6		-1.33		-1.92		-5.88		-2.23
T05H10.5		-1.59		-1.85		-3.33		-2.22	Y
Y55F3BR.2		-1.3				-2.56		-2.22		Y
Y73B6BL.5		-1.23				-2.94		-2.22
F37H8.2	-1.2			-2.94		-2.5		-2.2		Y
K10E9.1		-1.49		-2.44		-2.63		-2.2
K08H10.2		-12.5		-2.08		-6.67		-2.18
M88.6		-3.23						-2.18		Y
T01H3.4		-2.17						-2.18
H25P06.2		-1.75		-4		-4.76		-2.18
C09G4.5		-1.45		-2.5		-1.92		-2.18
T28B11.1				-2		-8.33		-2.18
F57C9.5		-1.28		-2.86		-4		-2.17
Y38C1AA.12		-2						-2.16		Y
Y66D12A.15		-1.89		-2.5		-3.45		-2.16
F55A3.3		-1.64				-2.38		-2.16
F32D1.9		-1.52		-3.33				-2.16
F20D12.2		-1.35		-3.45		-2.7		-2.16
Y39A3CL.7		-1.28		-2.5		-2.22		-2.16
Y54G11A.14		-1.28				-3.57		-2.16		Y
B0244.8				-5				-2.16
R02F2.1				-2.27		-3.7		-2.16
ZK973.2	-5					-5		-2.15
Y39G10AR.7	-3.33			-2.04		-3.13		-2.15
Y48G9A.4	-2.17			-2.04		-4.17		-2.15
T01A4.3		-1.89						-2.14		Y
Y32B12B.2		-1.89						-2.14
F35F11.1		-1.69		-2.5		-3.57		-2.14
Y18D10A.25		-1.69				-3.57		-2.14		Y
K04G2.8		-1.64				-2.27		-2.14
C43E11.3		-1.47				-2.33		-2.14
Y48E1B.13		-1.22						-2.14		Y
F46F11.2		-1.2		-2.38		-3.33		-2.14
Y43F11A.5				-1.82		-4.76		-2.13
C16A11.3	-5.88			-2.44		-2.56		-2.12
Y51A2D.7		-1.61		-3.57		-6.67		-2.11
ZC518.3				-2.94		-3.45		-2.11
D2045.1				-2.44		-2.86		-2.11
R08D7.6				-2.22		-3.03		-2.11
K07A12.2				-1.79	-12.5	-3.33		-2.11
Y47D3A.23						-4.17		-2.11		Y
C27D9.1	9	-1.23		-2.27		-3.57		-2.09
C27H5.3		-2.13			-5	-6.67		-2.09
F01G10.1		-1.54		-1.92		-4.17		-2.09
W02B12.2				-2.08		-2.94		-2.09
Y56A3A.17						-7.69		-2.09
F10G7.1		-1.56		-2.7		-4		-2.08
F52C9.8		-1.49		-1.96		-6.67		-2.07
F09E8.3		-1.33				-2.13		-2.07
B0303.2		-2.44						-2.06		Y
F37D6.3		-1.79				-2.33		-2.06		Y
Y38H6C.5		-1.27						-2.06		Y
K10D2.1		-1.49				-2.27		-2.04
Y46G5A.5				-2		-4		-2.04
T09A5.10	1.8	-1.47		-2.13	-5	-3.7		-2.03
F15B9.4		-1.33		-1.96		-3.85		-2.03
Y71G12B.28		-1.85						-2.02
F46F2.4		-1.67						-2.01		Y
C32F10.2		-1.33						-2.01
Y59A8B.6		-1.22		-2.5	5.61	-11.11		-2.01
C18G1.4		-1.32		-2.78	-5	-5		-1.99	Y
Y54E2A.11	-2.63	-1.41		-2.17		-4		-1.97
Y76B12C.6		-1.75				-2.78		-1.97
R74.8		-1.47		-2.08		-2.04		-1.97
K08E7.3		-1.45		-1.89		-4		-1.97
Y40B10A.2		-1.45						-1.97		Y
Y111B2A.13		-1.85						-1.96		Y
T04A8.16	-7.14							-1.95
T07C4.10		-1.39		-2.08		-5.56		-1.95
Y57A10A.1		-1.35						-1.95
F44B9.3		-1.27		-2.56		-4.55		-1.95
R107.6				-1.96		-3.33		-1.95
T24F1.2		-1.89				-11.11		-1.94
M01E11.3		-1.37		-4.55		-3.13		-1.93
Y65B4BR.4		-1.33		-1.79		-3.45		-1.92
F34D10.4				-2.33		-3.13		-1.92
C15H11.5				-2		-2.78		-1.92
F13C5.2	5.63	-2.08		-4.17		-5		-1.9		Y
K08H10.1		-14.29						-1.9
C04F5.1		-1.92						-1.9
F18E2.3		-1.28		-1.96		-5		-1.9
F25H5.3		-1.49						-1.89
C38D9.2		-1.33						-1.89		Y
Y111B2A.22	2.91	-1.39		-1.96		-2.56		-1.88
C16C10.3			3.96	-2.27		-4		-1.88
T27C4.4		-1.92				-2.63		-1.87
C37A2.4		-1.75						-1.87
F13D12.4				-2.5		-2.38		-1.87	Y
R74.3						-2.17		-1.87
C16A11.4		-1.23		-2.17		-3.57		-1.86
F58G1.1				-2.63		-4.35		-1.86
F10G7.4				-2.5	-3.23	-3.57		-1.85
C36A4.5		-1.59				-2.04		-1.84
T11F9.18		-1.37						-1.84		Y
D2030.6				-2.08	-3.13	-3.7		-1.84
Y57G11C.33						-4		-1.84		Y
D1081.7		-1.33		-1.92		-3.23		-1.83
R10F2.1		4.63				7.14		-1.83
F36A4.7				-2.13		-3.7		-1.82
T21G5.3	2.28			-2.08	-2.63	-2.94		-1.81
Y46E12BL.2	2.49	-1.23		-2.08	8.16	-4.17		-1.81
K02F3.4		-1.64						-1.81		Y
F54F2.2		-1.89				-2.38		-1.8		Y
F13D12.5		-1.33		-1.92		-2.5		-1.8
H34C03.2		-1.49				-3.03		-1.77	Y
Y37A1B.1				-2.5		-3.85		-1.77
Y46G5A.4	-1.27			-2		-3.7		-1.76
F54A3.1		1.46		-1.96		-2.5		-1.76
F57B9.6				-1.82		-3.23		-1.74
T03F6.1		-4.76						-1.73
C36E8.3		-1.85						-1.73		Y
F10E7.2		-1.52						-1.73		Y
F10G7.3		-1.45		-3.13		-2.94		-1.73
Y79H2A.11		-1.45		-1.79		-4.17		-1.73
R31.2		-1.28		-2.04		-2.27		-1.73
F29B9.2				-2.27		-3.33		-1.73
T21C12.1		-2.04		4.76				-1.72		Y
C04G6.1		-1.85				-3.23		-1.72		Y
Y49E10.17		-1.33		-4.17				-1.72		Y
R13H8.1		-1.3		-2.44		-4.55		-1.72		Y
Y40B10A.1				-2.04		-2.7		-1.72	Y
C46C2.1				-2.08		-4.17		-1.71
C06A8.5		-1.64		-1.82		-4.35		-1.7
T27F6.4		1.65		-2.44		-3.57		-1.7
F56C9.1				-1.89		-3.57		-1.69
Y14H12B.2				-2.94		-3.57		-1.67
F57B9.2	2.56	-1.32		-2.86		-2.56		-1.65
Y71A12B.10		-1.61						-1.65		Y
K04D7.1				-1.89		-2.94		-1.65
T12E12.3	1.46	-1.54		-2.78		-3.7		-1.63
Y73B6BL.38		-1.33			-5.88	-2.94		-1.63
F22B5.7		-1.69		-3.45		-12.5		-1.62
R10E11.1				-2.08		-4.35		-1.62
Y23H5A.1		-1.45						-1.6		Y
F07C6.4				-2.08		-2.04		-1.6
Y71D11A.1		-1.39						-1.57		Y
C38D4.4				-2.08		-7.14		-1.57
C50C3.6	2.41			-1.82		-3.03		-1.56
Y38C9A.1		-1.28				-6.25		-1.56
F43E2.1		-1.89				-2.08		-1.54
ZK1067.2		-1.47		-2.38		-3.03		-1.51
F28C6.2		-1.43		-1.72		-3.57		-1.51
M04B2.1		-1.37		-2.38	-4	-3.23		-1.51
C14B9.4				-2.44		-3.7		-1.51	Y
ZK632.7		-1.82						-1.47
C06G3.2		-1.33		-2.38		-3.45		-1.47
T24H10.5		-1.79				-7.69		-1.42		Y
D2096.1		-1.82						-1.41
K08D12.2		-1.39						-1.4		Y
T12D8.1		-1.32		-1.69		-3.33		-1.38
M163.3		-1.72						-1.3		Y
T12G3.1		-1.64				-2.56		-1.24		Y
C38C3.5	2.16	-1.2		-3.57		-8.33		-0.3	Y
T23G5.6		-1.49				-4.17		-0.28		Y
Y75B8A.30				-2.5		-7.14		-0.22
C25D7.16	-2.94							-0.17
Y55B1AL.3				-2.08		-4.17		10
F31E3.3		-1.75		-4		-6.67		11
C24G6.3		-1.79				-5.88		12
Y57G11C.8		-1.35						12	Y
M04B2.3						-6.67		12
C41C4.6				-5.88		-2.78		18
T10G3.5	-50			-2.5		-7.14
ZK1098.2	-33.33	-1.85
D2096.12	-33.33	-1.47		-7.69		-4.35
C15F1.3	-33.33
F55B12.3	-25	-1.39
C27F2.7	-25
C02F4.1	-20	-1.79		-3.33		-7.14
F20B6.7	-20
Y47H9C.9	-20									Y
T04A8.9	-16.67
Y55B1BL.1	-16.67
ZC64.2	-16.67
W06E11.2	-14.29	-2.5
F54D8.3	-14.29
Y25C1A.1	-14.29								Y
Y38A8.2	-14.29
C11D2.3	-12.5	-2.33								Y
F35B12.5	-11.11	-1.82
H20J04.4	-11.11	-1.37				-7.14
T12E12.1	-11.11	-1.32				-3.57
C56A3.6	-11.11			-7.69
F56B3.5	-11.11			-5		-5
C03B1.7	-11.11
C29E4.13	-11.11
C33H5.11	-11.11
F20G4.2	-11.11
F49E8.2	-11.11
K07F5.9	-11.11
R13G10.4	-11.11
T04C10.1	-11.11
W09H1.5	-11.11
Y92H12A.3	-11.11
ZC328.3	-11.11
C05D11.3	-9.09	-3.7
Y54E5A.3	-9.09	-3.45								Y
ZK863.6	-9.09	-2.33
C05B10.1	-9.09	-2.13
ZK512.5	-9.09	-1.61			-5
W04D2.6	-9.09	-1.61
ZK669.4	-9.09			-7.69		-7.69
Y47G6A.23	-9.09			-2.5		-25
K11H3.1	-9.09					-5
Y110A7A.16	-9.09					-5
K07A1.11	-9.09					-3.23
W09C3.2	-9.09
C50F4.12	-9.09									Y
F07E5.5	-9.09
F13G3.5	-9.09
F14D2.12	-9.09
F26A3.7	-9.09
F44D12.6	-9.09								Y
F52F12.5	-9.09
F54B3.2	-9.09
F56B3.12	-9.09
R11B5.1	-9.09
T04C10.2	-9.09
T09A5.12	-9.09									Y
T23G7.5	-9.09
Y55B1AR.4	-9.09
Y97E10AR.6	-9.09
ZK353.4	-9.09
F37C12.1	-8.33	-1.64
M03F8.3	-8.33	-1.47				-4.17
B0286.1	-8.33
C36B1.5	-8.33
F07E5.1	-8.33									Y
Y14H12B.1	-8.33
Y32F6A.2	-8.33
T04H1.4	-7.69	-1.92
K01H12.4	-7.69
F16D3.7	-7.14	-2.56								Y
ZK1236.3	-7.14	-1.89
F25H2.13	-7.14	-1.69
F08F8.2	-7.14	-1.61		-2.78		-3.57
F49C12.12	-7.14			-2.22		-2.27
C47E12.1	-7.14					-5.88
Y39A1A.21	-7.14					-5
B0464.9	-7.14
C04E7.3	-7.14									Y
C26E6.8	-7.14
C30A5.2	-7.14									Y
C41H7.4	-7.14
C44B9.1	-7.14
C53A5.6	-7.14
F09E5.13	-7.14
F10C2.5	-7.14									Y
F21C3.6	-7.14
F25B3.6	-7.14
F46B6.4	-7.14									Y
F55A4.8	-7.14
F56F3.6	-7.14									Y
F58A6.8	-7.14
H25P19.1	-7.14
K08H2.1	-7.14									Y
M04G7.3	-7.14
M162.8	-7.14									Y
R04E5.9	-7.14									Y
T02E1.7	-7.14
T02H6.7	-7.14
T14G10.4	-7.14
T23G11.6	-7.14
W04A8.3	-7.14									Y
W05F2.7	-7.14
W10G11.20	-7.14
Y40B1B.8	-7.14
Y54E10BR.3	-7.14
Y57G11C.36	-7.14
Y75B7B.2	-7.14
Y7A5A.9	-7.14
ZC404.8	-7.14
ZK287.5	-7.14
C46A5.9	-6.67
T01D1.2	-6.25	-1.69		-4.55		-3.57
K07C5.3	-6.25	-1.67		-7.14		-16.67
T23F6.4	-6.25	-1.28				-4
Y71G12B.1	-5.88					-12.5
F53B6.7	-5.88					-7.14			Y	Y
K10B3.5	-5.88					-3.57				Y
F39E9.4	-5.88
F47D12.7	-5.88
K11B4.1	-5.88
T12G3.6	-5.88
W09G3.1	-5.88
R13A5.1	-5.26	-2.08
E03H12.7	-5.26	1.61							Y
C15H7.4	-5.26
R12C12.2	-5.26
W04B5.5	-5.26
F07E5.8	-5			-2.7		-1.64
B0035.11	-5					-3.23
Y73F8A.33	-4.76	-1.54								Y
F21F3.3	-4.55	-5.88							Y
F42G8.3	-4.55	-2.44								Y
F35H12.2	-4.55	-1.82								Y
T04A11.6	-4.55	-1.47				-2.44
K12D12.5	-4.55	-1.43				-5.26
F11A10.7	-4.55	-1.39				-14.29
W10C8.2	-4.55			-9.09		-11.11
Y39G10AR.12	-4.55			-2.13		-3.23
Y51B9A.3	-4.55
F34D10.2	-4.55
F56D2.2	-4.55
C54G4.9	-4.35
Y39G10AR.6	-4.17	-1.67								Y
B0391.9	-4.17									Y
C05D11.9	-4.17
Y54G2A.20	-4.17									Y
F16D3.4	-4			-7.14		-8.33
F38A5.13	-4			-4.76		-4.17
K01C8.9	-4					-4
C41C4.4	-4									Y
F43G9.6	-4
Y51H1A.6	-4
ZC410.7	-4
ZK637.7	-3.85			-2.38		-3.85
Y63D3A.6	-3.85					-5.88
F44F1.4	-3.85									Y
H38K22.1	-3.85
Y116A8C.27	-3.85
Y53F4B.15	-3.7	-2				4.76
Y76B12C.8	-3.7	-1.54								Y
T01C3.6	-3.7					-2.78
F41E6.9	-3.7
F10B5.7	-3.57	-1.64		-2.86		-25
W09B6.4	-3.57			-7.14
Y80D3A.2	-3.57			-2.7		-4
T10B5.3	-3.45			-5		-2.86
F10B5.2	-3.45					-9.09
F54F2.5	-3.45					-4.17
B0047.3	-3.45					-2.56				Y
ZK662.3	-3.45									Y
K07F5.11	-3.33	1.48							Y
C18D4.6	-3.33									Y
F14D2.13	-3.33
B0457.1	-3.23	-1.79
F18C12.3	-3.23	-1.75				-10
F32A11.3	-3.23	1.93							Y
F21F8.7	-3.23
F49C5.3	-3.23									Y
K09B11.5	-3.23
T10H9.3	-3.23									Y
Y54E5A.2	-3.23
F56D12.6	-3.13	-1.52
F11H8.1	-3.13			-5		-5
Y49E10.19	-3.13			-2.33		-2.86
M02B7.5	-3.13			-2.04		-3.57
F27C8.5	-3.13								Y
T04A8.13	-3.13
M01F1.7	-3.03
C14B1.9	-2.94					-3.7
F56B3.9	-2.94
T04D1.4	-2.94
T28F3.4	-2.94
C47D12.2	-2.86	-1.69				-3.23				Y
C27B7.5	-2.86			-3.57		-4.17
C05D2.6	-2.86			-2.22		-5.26
B0205.10	-2.86								Y
F34D10.8	-2.86
JC8.11	-2.86									Y
K02E2.7	-2.86
Y111B2A.17	-2.78
ZK1127.11	-2.78
C04F6.1	-2.7	-11.11			-14.29
F49E12.4	-2.7	2.25							Y
M01E11.4	-2.7									Y
Y39G10AR.15	-2.7
Y105C5B.18	-2.63	-1.39
T23G11.1	-2.63			8.32		8.16
F21D5.5	-2.63
F58B3.4	-2.63
T12D8.8	-2.63
B0336.1	-2.56	-1.69		-2.04		-3.7
Y76A2B.5	-2.44					-5.88
T06E4.1	-2.38	-1.72		-2.63		-3.57
Y71F9AM.4	-2.33	-1.64
C32F10.1	-2.33			-3.33
T04C12.5	-2.33			-2.94		-2.5			Y
T22B3.2	-2.33			4.76					Y
C32D5.10	-2.33					-1.82
C18E3.1	-2.33								Y
K05F1.3	-2.33
B0391.10	-2.22	-1.23								Y
K06A5.4	-2.17	-2.04				-2.78
F26E4.10	-2.17			-5.88
T01C3.3	-2.17			-1.75		-1.96
F49F1.12	-2.17								Y
F58A4.9	-2.17
T28D6.6	-2.17									Y
Y53F4B.5	-2.17
Y75B8A.33	-2.17									Y
Y105E8A.24	-2.08
T20D3.11	-2.04			-3.23		-3.7
F28C6.7	-2.04
C33A12.3	-2			-6.67		-7.69
F36A2.10	-2
C47E8.4	-1.96					-7.14
F25H2.11	-1.89	-1.35		-2.33		-3.45
F14D2.4	-1.79	-1.61								Y
R05D3.11	-1.75	-1.69		-3.7		-5.88
Y54H5A.4	-1.75					-6.67
F59H6.2	-1.69									Y
M03C11.3	-1.56	-1.61	-3.33			-9.09
M01D7.7	-1.37	-1.56
F56F4.5	1.47	-7.14
C47E8.11	1.77	1.66							Y
C53A5.2	1.79			-4.17		-3.23
T01C3.7	1.84			-2.27	-7.69	-4.76
T20B12.1	1.95	-1.96
F36H12.5	2.24	-2.33							Y
C01A2.5	2.29
C06G4.1	2.38	-1.22		-2.04		-3.7
T09A5.11	2.41	-1.28		-2.38		-2.27			Y
F31D4.3	2.49	-1.82				-2.94
K12D12.4	2.6		4.76		28.55
H19M22.2	2.6
C34E10.6	2.77	-1.64
C10H11.9	2.81		-5	-2.78		-3.13
F12F6.5	2.89	-2.13
M01E5.5	2.89
W03C9.8	2.92								Y
C06A5.6	2.94			-1.89		-4
Y41C4A.18	3.22	-2.17
F42G8.11	3.25
F35E2.5	3.61								Y
T02G5.4	3.68	-2.44				-7.69
Y95B8A.5	3.68
T22D1.4	3.75			-6.67		-2.38			Y
W02G9.3	3.9	-2.33				-4.35
K11H3.2	3.9
ZK1248.6	3.9
Y52D3.1	4.11	-1.67
C29E4.8	4.11			-4.17		-7.14			Y
F27C1.1	4.11
T05H10.1	4.33	-1.67		-2.78		-3.57
H06I04.4	4.41	-1.56			2.29
F11A10.1	5.63	-1.54				-1.96
Y49A3A.2	5.63	-1.54
F37C12.7	5.63	-1.28							Y
F54A3.2	5.63
Y92H12BL.1	5.63
Y24D9A.2	6.06	-1.64
F43G6.9	6.06					-2.27
C03D6.6	6.06
C10C6.3	6.06
Y67H2A.1	6.49
ZK829.4	6.93	-1.75				-7.69
ZK430.7	6.93				11.21
B0365.3	6.93					-2.78
Y37E11AL.2	6.93
Y71F9AL.17	7.36			-2.63		-5
Y49E10.11	7.36				5.1	-7.14
K07F5.13	7.79	-1.61		-3.13		-4.17
F10G7.2	7.79	-1.54	-5	-2.5		-2.7
Y47D3B.9	7.79			-7.69
C27H6.2	7.79			-2.27		-3.7
C28D4.3	7.79					-6.67
Y106G6D.6	7.79
C16A11.2	8.01	-2.22			18.35	-5
Y69A2AR.19	8.23
K01C8.10	9	-2.44		-4.76		-4.17
F56D1.1	9	-2.04								Y
C37C3.2	9	-1.61				-4.55
F55A11.3	9	1.44
H15N14.2	9			-1.72		-4
F43G6.7	9					-9.09
Y71F9AL.9	9					-2.86
B0495.7	9									Y
F39H11.3	9									Y
K01A11.4	9									Y
K08E7.1	9
R03D7.2	9
T24E12.11	9									Y
ZK632.4	9
Y59A8A.3	9.52					-4.35
Y92H12A.1	9.96
F42A9.1	10	-1.92				-5				Y
C29H12.2	10	-1.52								Y
T10F2.3	10					-5
T23G5.1	10.82
Y50D7A.11	11	-3.57				-5
R06C7.4	11	-2.63
T01E8.6	11			-8.33		-5
B0336.3	11			-1.96		-2.27
ZK1058.2	11					-4.35
C41C4.8	11
E01A2.1	11
F37A4.2	11
T22C1.8	11								Y
Y44A6D.5	11
Y82E9BR.1	11.26	-1.92								Y
T28F12.3	11.26			-12.5	7.14
Y37D8A.21	12.81			-4.76		-3.7
Y104H12D.4	13	-2.78
Y48A6B.5	13			-6.67
C34C6.4	13			-5
C06G1.4	13
F56F3.4	13								Y
Y82E9BR.3	13
B0432.11	14								Y
F27D4.1	14								Y
W02F12.3	15
Y73B3A.14	15.15
C18E9.8	17
Y54E10A.3	17.32				7.14
H06I04.6	19
T28D6.4		-33.33								Y
H15N14.1		-25				-12.5
C24G6.4		-11.11								Y
C31G12.1		-11.11
K02E7.4		-11.11
T26H2.10		-11.11
C49H3.4		-9.09								Y
C50B6.11		-9.09
E03H4.11		-9.09
F25G6.3		-9.09
F37A4.7		-9.09
K09E3.2		-9.09
M03B6.4		-9.09
M03E7.3		-9.09
M03F4.2		-9.09
Y48G1C.9		-9.09
Y73B3B.3		-9.09								Y
ZK524.2		-9.09
F10F2.7		-8.33
F23F12.3		-8.33
Y102A5C.19		-8.33								Y
F42G9.4		-7.14								Y
F57B9.4		-7.14								Y
T12B5.1		-7.14
T27F7.1		-7.14
Y43F8B.18		-7.14
K07B1.4		-6.25
K12C11.5		-5.88
M01D7.5		-5.88
M04B2.2		-5.88
M18.3		-5.56
R06B9.6		-5.56
Y48D7A.1		-5.56								Y
Y54G11B.1		-5.56								Y
F25H2.12		-5.26	-5
C04A2.1		-5.26								Y
F09E5.2		-5.26
F41C3.3		-5.26
F43G6.4		-5.26								Y
R05D3.12		-5.26
T02C1.1		-5.26								Y
T25G3.1		-5.26
Y71G12A.2		-4.76								Y
ZK856.4		-4.76								Y
B0545.1		-4.55
F25H2.7		-4.55
F54F11.2		-4.55
F55A4.1		-4.55
H26D21.1		-4.55
K08A2.4		-4.55
R04A9.2		-4.55
R155.4		-4.55
Y76A2B.2		-4.55								Y
C24H11.9		-4.35				-5
Y53F4B.17		-4.35				5.1				Y
Y37E3.3		-4.35
C08F11.7		-4.17								Y
F40F8.3		-4.17
F47B3.4		-4.17
T20B5.1		-4.17
F21H11.2		-4
Y57A10A.30		-4
F26H9.6		-3.85				-5
F45E4.2		-3.85
K10C8.2		-3.85								Y
M02E1.1		-3.85
R148.2		-3.85
T07A9.8		-3.85
Y43E12A.3		-3.85
Y48C3A.16		-3.85
ZK892.1		-3.85
F52A8.4		-3.7								Y
Y47H9C.8		-3.7
B0285.7		-3.57								Y
F42H10.9		-3.57
F49B2.1		-3.57								Y
W10D5.1		-3.57								Y
R07E5.8		-3.45				-4.35
C08B6.8		-3.45								Y
F18A1.5		-3.45								Y
H01A20.1		-3.45								Y
R08D7.5		-3.45								Y
T13H5.8		-3.45
Y23H5B.1		-3.45
Y48A6C.5		-3.45								Y
F54E4.1		-3.33		-7.69						Y
W06A11.4		-3.33				-9.09				Y
Y38C1AA.1		-3.33				-9.09
C02F5.3		-3.33
C18E9.11		-3.33
EEED8.3		-3.33
F12E12.4		-3.33								Y
F32B6.9		-3.33								Y
R06C1.4		-3.33								Y
T06A10.3		-3.33
Y17G9B.5		-3.33
Y38E10A.28		-3.33								Y
Y71F9AM.5		-3.33
ZK1127.12		-3.33
Y67D8A.2		-3.23		-12.5		-5.88
F56D12.4		-3.23				-5.88				Y
W02A11.4		-3.23				-5.88
B0285.4		-3.23
C36F7.2		-3.23
C46E10.4		-3.23
D2007.4		-3.23
T22F7.1		-3.23
Y48A6B.9		-3.23
Y50D4A.2		-3.23
ZC395.7		-3.23
C06H5.7		-3.13
C40H1.6		-3.13
C42C1.8		-3.13
F09E5.7		-3.13
F10E7.6		-3.13
M02B1.3		-3.13
R10H10.1		-3.13
Y47H9C.10		-3.13
Y87G2A.16		-3.13
ZC434.7		-3.13								Y
ZK40.1		-3.13
Y49A3A.1		-3.03				-7.14
F01G4.2		-3.03
F10E9.3		-3.03
M116.2		-3.03
R148.1		-3.03								Y
R151.5		-3.03								Y
T05H10.2		-3.03
T23G11.4		-3.03
Y65B4BR.8		-3.03
C14B1.4		-2.94		-8.33		-10
F45C12.2		-2.94				-6.67				Y
B0361.4		-2.94								Y
C06A8.3		-2.94								Y
C36C9.1		-2.94								Y
F09G2.1		-2.94								Y
F21F3.4		-2.94
R05C11.3		-2.94								Y
T23C6.1		-2.94
R05F9.6		-2.86		-3.7		-6.25
T13H5.7		-2.86				-7.69
Y73B6BL.3		-2.86				-5
B0496.1		-2.86
C37C3.1		-2.86
C39F7.5		-2.86								Y
F10B5.5		-2.86
F30A10.8		-2.86								Y
T09A5.9		-2.86
T22D1.5		-2.86
T23B12.1		-2.86
Y37E3.4		-2.86
Y54E10A.7		-2.86
Y71H2B.3		-2.86
ZC395.6		-2.86
ZK1127.3		-2.86
ZK673.5		-2.86								Y
Y57A10A.8		-2.78		-5		-5
C33H5.7		-2.78				-5.88
C38D4.9		-2.78
D1007.10		-2.78								Y
D2030.9		-2.78								Y
F01F1.5		-2.78
F59H6.12		-2.78								Y
H43I07.3		-2.78
K10D3.3		-2.78
R05D3.1		-2.78
R11G11.2		-2.78								Y
T09F3.4		-2.78								Y
Y39B6A.39		-2.78
Y48C3A.20		-2.78
Y60A3A.8		-2.78
Y95D11A.3		-2.78
T25G12.4		-2.7	4.76
ZC155.1		-2.7		-4.17
C47B2.8		-2.7								Y
C50F7.4		-2.7
F28B3.4		-2.7
F35C11.5		-2.7
F40F4.3		-2.7								Y
F56H1.6		-2.7
Y38F2AR.3		-2.7
Y39G10AR.11		-2.7
Y53H1A.2		-2.7
Y57G11C.43		-2.7
C06G3.7		-2.63								Y
C34D4.4		-2.63
C50E10.4		-2.63
F08B4.2		-2.63
F16B4.5		-2.63								Y
F35G12.12		-2.63
F39H2.3		-2.63
M03A8.2		-2.63
R144.2		-2.63
T02G5.8		-2.63
T09F3.2		-2.63
T21B10.1		-2.63
W06D4.3		-2.63
Y75B8A.31		-2.63
ZK546.2		-2.63
Y49F6B.1		-2.56				-5
Y106G6H.7		-2.56				-4.55
R10E11.3		-2.56				-4
F13E9.1		-2.56
F23C8.1		-2.56								Y
F33H2.3		-2.56
F35D11.4		-2.56
K07C5.2		-2.56
M03F8.2		-2.56
R05D11.6		-2.56
R102.3		-2.56
T23D8.1		-2.56
Y41D4B.27		-2.56
Y62E10A.8		-2.56								Y
ZK863.7		-2.56								Y
F13G3.7		-2.5		-2.5		-14.29
ZK353.1		-2.5				-5.88
C02F5.6		-2.5				-5
E02H1.6		-2.5				-5
Y71A12B.4		-2.5				-5				Y
C29G2.1		-2.5								Y
C30G12.1		-2.5								Y
F56E10.1		-2.5
R11G10.3		-2.5								Y
T17A3.2		-2.5								Y
Y48C3A.1		-2.5								Y
Y50D7A.9		-2.5
Y75B12B.1		-2.5
ZK643.1		-2.5								Y
Y66H1A.4		-2.44		-6.67		-4
F41H10.4		-2.44				-7.14
K06A5.1		-2.44				-6.25
Y51H4A.15		-2.44				-4
C18A3.2		-2.44
C23H3.4		-2.44								Y
D2096.4		-2.44
F23B2.6		-2.44
F32D8.5		-2.44
F54D5.2		-2.44
K04G7.1		-2.44
R11D1.10		-2.44
R148.4		-2.44
T07G12.10		-2.44
Y40D12A.1		-2.44								Y
ZC328.4		-2.44
ZC477.3		-2.44
T04A8.7		-2.38		-6.67		-7.69
F56C9.3		-2.38		-3.7
H43I07.2		-2.38				-5.26
K06H7.3		-2.38				-4.35
F59C6.4		-2.38				-3.57
C17G10.2		-2.38
C49C3.6		-2.38
F25H9.5		-2.38								Y
H27A22.1		-2.38
C09H10.6		-2.33				-11.11
Y17G7B.12		-2.33				-7.14
F48C1.2		-2.33				-6.67
F59G1.5		-2.33				-6.67
F10E7.5		-2.33				-5
B0336.5		-2.33
C34E10.3		-2.33
C42C1.10		-2.33
D2045.9		-2.33								Y
F21G4.5		-2.33								Y
F26G5.1		-2.33
F36A2.11		-2.33
F47G6.4		-2.33
F48E8.2		-2.33
F56C11.4		-2.33
F58A4.1		-2.33
H20J04.6		-2.33
H24K24.3		-2.33								Y
K10G6.1		-2.33
T02G5.14		-2.33
T13F2.1		-2.33
T16G12.4		-2.33								Y
T21C9.13		-2.33
T26A8.1		-2.33							Y	Y
T27E9.4		-2.33								Y
T28F12.2		-2.33
W04C9.1		-2.33								Y
W05H9.2		-2.33
Y102A11A.3		-2.33								Y
Y19D2B.2		-2.33								Y
Y32F6A.6		-2.33								Y
Y41D4B.11		-2.33
Y45F3A.3		-2.33
F53F4.14		-2.27				-2.78
T02G5.7		-2.27
Y61A9LA.12		-2.27								Y
C03H5.3		-2.22				-6.67
F52A8.6		-2.22				-5
ZK1127.5		-2.22				-4
F28B3.1		-2.22				-3.33
C09G1.3		-2.22								Y
F27D4.4		-2.22								Y
K07H8.3		-2.22
T16G1.11		-2.22
ZK632.11		-2.22
W03B1.4		-2.17		-12.5		-5.88
C26E6.6		-2.17		-5.88		-4.55
Y22D7AL.7		-2.17		-2.44		-3.23				Y
F21A3.5		-2.17				-11.11
F46F11.1		-2.17				-9.09
F36H12.2		-2.17				-5
W09C3.4		-2.17				-5
Y37E11AM.1		-2.17				-4
K02F2.3		-2.17				-2.27
C01G5.8		-2.17
C16A3.2		-2.17
C26E6.1		-2.17
C34E10.11		-2.17
F56A8.4		-2.17
F59G1.8		-2.17
W03C9.6		-2.17
W03F11.5		-2.17
Y48G1A.3		-2.17
Y50D7A.3		-2.17
ZC376.7		-2.17
B0491.1		-2.13				-3.7
B0035.5		-2.13
B0432.2		-2.13
E02H1.8		-2.13
F08H9.2		-2.13
F36A2.3		-2.13								Y
F39B2.2		-2.13
F53F4.3		-2.13
F56A3.1		-2.13
R11H6.2		-2.13
T12B5.3		-2.13								Y
T13H5.3		-2.13
Y42G9A.1		-2.13								Y
Y43F8C.9		-2.13							Y
Y48A5A.1		-2.13
Y53F4B.21		-2.13
Y60A9.3		-2.13								Y
Y69A2AR.6		-2.13
ZK1098.4		-2.13
ZK1236.1		-2.13
ZK973.1		-2.13
R07H5.1		-2.08		-6.67		-7.69
Y47A7.1		-2.08		-2.86		-3.33
Y39G10AR.2		-2.08		-2.27
Y81G3A.3		-2.08		-2.22		-7.69
T25D3.4		-2.08				-7.69
Y37D8A.10		-2.08				-5
C56E6.1		-2.08				-4.35
ZK652.6		-2.08				-2.56
B0205.12		-2.08
C25D7.8		-2.08
C27A12.3		-2.08
C36B1.7		-2.08
F09D1.1		-2.08
F48F5.5		-2.08
F53F1.2		-2.08
T04D1.3		-2.08
T07A9.10		-2.08
T07F10.5		-2.08								Y
T14B4.3		-2.08
W08A12.1		-2.08
Y39G10AL.1		-2.08
Y57G7A.2		-2.08								Y
Y79H2A.4		-2.08
ZC477.2		-2.08
Y71G12B.12		-2.04		-10		-4
Y43F4B.7		-2.04		-6.67		-7.69
K12H4.3		-2.04		-5.56
Y87G2A.7		-2.04		-4.17		-5
R74.5		-2.04		-3.33
F11A10.4		-2.04		-1.96		-2.27
Y39A1A.13		-2.04				-11.11
Y39E4B.5		-2.04				-5.88
Y108G3AL.2		-2.04				-5
Y45F10C.6		-2.04				-4.35				Y
C49H3.5		-2.04				-4
F25H2.6		-2.04				-4
B0001.6		-2.04								Y
C34E10.1		-2.04
F02E9.7		-2.04
F09E5.3		-2.04
F11A3.2		-2.04
F11C3.1		-2.04								Y
F19F10.12		-2.04								Y
T06C12.4		-2.04
T19A6.2		-2.04
W09D6.4		-2.04							Y
Y48G8AL.7		-2.04
Y53G8AL.1		-2.04
Y56A3A.13		-2.04
Y67D2.4		-2.04
Y73C8B.4		-2.04								Y
ZC513.4		-2.04
K04F10.4		-2		-5.88
C43E11.1		-2		-3.57		-5.56
F59B2.6		-2		-3.57		-3.45
F08B4.1		-2		-3.33		-7.69
R07G3.3		-2		-2.63		-3.85
Y55F3BR.4		-2			5.1					Y
Y66D12A.19		-2				-7.69
C40H1.1		-2				-7.14
Y113G7B.16		-2				-4.35
F10C5.1		-2				-4.17
W02B8.2		-2				-3.57				Y
ZK662.4		-2				-3.23				Y
C34E10.4		-2
F22F1.1		-2								Y
F28B3.5		-2
F31E3.1		-2								Y
F46A9.1		-2
F48E8.4		-2
F57B10.1		-2
M176.4		-2
R06A10.1		-2
W08E3.3		-2
Y47G6A.31		-2								Y
F59E10.1		-1.96	4.76		40.78	10.87
C10C6.1		-1.96		-2.78		-5.56
C50E3.5		-1.96				-9.09
F23B12.6		-1.96				-5.26
T05E7.3		-1.96				-5
F32A5.1		-1.96				-3.23
K10C3.6		-1.96				-2.22
C05C10.6		-1.92		-2.5		-3.57
Y110A7A.1		-1.92		-1.72		-3.13
ZK632.5		-1.92				-9.09
Y47G6A.2		-1.92				-4
Y49E10.14		-1.92				-4
K05C4.6		-1.92				-2.94
T24F1.1		-1.92				-2.94
F59G1.3		-1.92				-2.5
Y54E2A.6		-1.89		-14.29		-2.27
T27F2.3		-1.89		-5
C14A4.5		-1.89		-3.7		-3.23
C01B10.8		-1.89		-3.7
H20J04.2		-1.89		-3.13		-3.7
F13H8.2		-1.89		-2.7		-5.26
Y74C10AR.1		-1.89		-2.22		-2.94
T07G12.12		-1.89				-12.5
ZK1098.10		-1.89				-11.11
T19A5.2		-1.89				-4.17
B0250.5		-1.85		-7.14		-6.67
Y48G1C.2		-1.85		-5
Y39A1A.12		-1.85		-3.85		-4.35
R05D3.2		-1.85		-3.23		-3.13
B0261.1		-1.85		-2.22		-4.76
F20C5.1		-1.85				-2.08
K02F2.1		-1.82		-4.55		-7.69
Y102A5A.1		-1.82		-4.55		-3.13
C06G4.2		-1.82		-4.17		-5
F18C12.2		-1.82		-3.85		-16.67
F57B9.5		-1.82		-2.86		-4.35
K04C2.2		-1.82		-2.86		-2.38
B0464.2		-1.82				-9.09
T08D2.7		-1.82				-5.88
C53B4.4		-1.82				-3.13
H38K22.2		-1.79		-11.11
T10G3.6		-1.79		-10		-5
Y47G6A.4		-1.79		-7.14
T22C1.3		-1.79		-3.13		-14.29
C47E8.8		-1.79		-2.22		-4.76
C14A4.14		-1.79				-11.11
C24G6.1		-1.79				-6.67			Y
F01F1.4		-1.79				-5.88
F52C12.1		-1.79				-3.45
ZK652.3		-1.75		-3.33		-12.5			Y
T28A8.6		-1.75		-2.86		-3.33
F55G1.4		-1.75		-1.89		-4.17
T22C1.1		-1.75				-7.69
[truncated: 1,236 more rows]

## Sheet: Figure 3 analysis
Endo-siRNA locus	adr-1 Sense	adr-1 Antisense	adr-2 Sense	adr-2 Antisense	K39A Sense	K39A Antisense
[truncated: 2,321 more rows]

[truncated: 2 more sheets: List of all annotated loci, Dicer Helicase dependent Loci]
