# Supplementary material for: Effects of ADARs on small RNA processing pathways in C. elegans
Source: HighWire-hosted journal article supplement (doi:10.1101/gr.134841.111), 2012-06-06
Supplement: S_Table5.xlsx [file S_Table5.xlsx]

## Sheet: adr-1
piRNA	Normalized # of WT reads	Normalized # of adr-1 reads	Fold change (adr-1 vs wt)	pVal
21UR-10327	0	44	44	1.31282e-07
21UR-2742	0	29	29	2.91254e-05
21UR-7560	0	28	28	4.1752e-05
21UR-3810	0	24	24	0.000176317
21UR-18	0	22	22	0.000362329
21UR-12050	0	19	19	0.00106737
21UR-4769	0	19	19	0.00106737
21UR-2906	0	19	19	0.00106737
21UR-4160	0	18	18	0.0015301
21UR-12268	0	17	17	0.00219344
21UR-11560	0	16	16	0.00314434
21UR-9434	0	15	15	0.00450748
21UR-1215	0	15	15	0.00450748
21UR-2277	0	14	14	0.00646158
21UR-13345	0	14	14	0.00646158
21UR-4811	0	13	13	0.00926281
21UR-3599	0	13	13	0.00926281
21UR-6257	0	13	13	0.00926281
21UR-2241	0	13	13	0.00926281
21UR-3120	4.62	54	11.6883	5.48605e-07
21UR-841	2.31	26	11.2554	0.00076043
21UR-8430	2.31	26	11.2554	0.00076043
21UR-4652	2.31	25	10.8225	0.0010529
21UR-11385	2.31	23	9.95671	0.00201081
21UR-9157	2.31	20	8.65801	0.00524807
21UR-2516	2.31	20	8.65801	0.00524807
21UR-1635	2.31	19	8.22511	0.00720043
21UR-4279	2.31	18	7.79221	0.00985925
21UR-835	2.31	18	7.79221	0.00985925
21UR-2273	2.31	18	7.79221	0.00985925
21UR-3825	4.62	33	7.14286	0.000429586
21UR-2527415	4.62	33	7.14286	0.000429586
21UR-2972	4.62	32	6.92641	0.000582993
21UR-2161	30.03	195	6.49351	9.8707e-18
21UR-960	4.62	28	6.06061	0.0019456
21UR-2752	4.62	27	5.84416	0.00261769
21UR-1618	78.54	458	5.83142	2.17786e-37
21UR-8358	11.55	65	5.62771	2.50808e-06
21UR-6329	4.62	25	5.41126	0.00470874
21UR-94	18.48	95	5.14069	2.83298e-08
21UR-2757	6.93	35	5.05051	0.000953508
21UR-5016	4.62	23	4.97835	0.00839083
21UR-6221	4.62	23	4.97835	0.00839083
21UR-14430	4.62	23	4.97835	0.00839083
21UR-10414	346.5	1694	4.88889	4.38632e-119
21UR-6059	9.24	44	4.7619	0.000264742
21UR-9473	6.93	33	4.7619	0.00167808
21UR-681	6.93	33	4.7619	0.00167808
21UR-4040	9.24	43	4.65368	0.000349652
21UR-2596	6.93	32	4.6176	0.00221932
21UR-782	6.93	32	4.6176	0.00221932
21UR-14571	16.17	70	4.329	8.01469e-06
21UR-1798939	6.93	30	4.329	0.0038559
21UR-5167	13.86	59	4.25685	4.79168e-05
21UR-8666	9.24	37	4.00433	0.00178616
21UR-3396	9.24	36	3.8961	0.00232738
21UR-2061	16.17	63	3.8961	5.11729e-05
21UR-9021	9.24	34	3.67965	0.00392396
21UR-3322	9.24	34	3.67965	0.00392396
21UR-13680	66.99	242	3.61248	1.44578e-14
21UR-5485	20.79	72	3.4632	4.15652e-05
21UR-6091	11.55	40	3.4632	0.00232011
21UR-2691291	9.24	32	3.4632	0.00654931
21UR-116	820.05	2824	3.44369	4.3439e-145
21UR-4415	23.1	78	3.37662	2.53384e-05
21UR-13821	97.02	322	3.3189	2.11812e-17
21UR-13283	20.79	69	3.3189	8.68982e-05
21UR-6834	25.41	84	3.30579	1.54235e-05
21UR-13388	25.41	84	3.30579	1.54235e-05
21UR-3754	11.55	38	3.29004	0.00381927
21UR-4706	11.55	37	3.20346	0.00488204
21UR-3787	27.72	87	3.13853	1.91606e-05
21UR-7831	13.86	43	3.10245	0.00284652
21UR-2192	13.86	42	3.0303	0.0036124
21UR-1393	27.72	83	2.99423	4.87949e-05
21UR-11340	23.1	69	2.98701	0.000216902
21UR-10996	110.88	329	2.96717	9.99588e-16
21UR-10560	25.41	75	2.95159	0.000129321
21UR-4013	11.55	34	2.94372	0.0100325
21UR-8229	18.48	54	2.92208	0.00123822
21UR-6845	27.72	80	2.886	9.69761e-05
21UR-1992	159.39	458	2.87346	1.82075e-20
21UR-14395	103.95	295	2.8379	1.54011e-13
21UR-8141	46.2	130	2.81385	1.05083e-06
21UR-14467	194.04	529	2.72624	7.32555e-22
21UR-4130	344.19	929	2.69909	1.34276e-36
21UR-311	34.65	93	2.68398	6.24289e-05
21UR-163	36.96	99	2.67857	3.73138e-05
21UR-13053	138.6	370	2.66955	2.38932e-15
21UR-2841	106.26	283	2.66328	4.58567e-12
21UR-9679	57.75	152	2.63203	4.74822e-07
21UR-2470	30.03	78	2.5974	0.000335881
21UR-14731	20.79	54	2.5974	0.00277578
21UR-1678	18.48	48	2.5974	0.00475776
21UR-9843	413.49	1065	2.57564	5.57373e-39
21UR-1824	80.85	208	2.57267	7.24787e-09
21UR-4985	101.64	261	2.56789	1.00501e-10
21UR-3470	62.37	160	2.56534	4.01248e-07
21UR-5785	20.79	53	2.5493	0.00344235
21UR-4429	124.74	316	2.53327	1.97039e-12
21UR-4078	27.72	69	2.48918	0.00106852
21UR-5515	34.65	86	2.48196	0.000275183
21UR-5886	288.75	716	2.47965	2.63613e-25
21UR-1166	32.34	80	2.47372	0.000462398
21UR-5025	381.15	922	2.419	7.36394e-31
21UR-602	2471.7	5956	2.40968	9.11087e-188
21UR-5282	41.58	100	2.405	0.00013273
21UR-7056	66.99	161	2.40334	1.37728e-06
21UR-6581	64.68	155	2.39641	2.27528e-06
21UR-1615	39.27	93	2.36822	0.000270887
21UR-4264	36.96	87	2.3539	0.000452973
21UR-4292	182.49	429	2.35081	1.37052e-14
21UR-6106	73.92	173	2.34037	1.00032e-06
21UR-10937	150.15	349	2.32434	5.97953e-12
21UR-1623	80.85	186	2.30056	5.91477e-07
21UR-456	48.51	111	2.28819	0.000114729
21UR-6101	267.96	612	2.28392	3.51662e-19
21UR-1312	284.13	646	2.27361	5.34451e-20
21UR-1143	39.27	87	2.21543	0.000873241
21UR-2983	76.23	168	2.20386	4.93875e-06
21UR-6002	53.13	117	2.20215	0.000131516
21UR-3093	166.32	362	2.17653	4.43912e-11
21UR-2147	1510.74	3287	2.17575	7.77428e-87
21UR-2237322	251.79	547	2.17245	7.04651e-16
21UR-13192	99.33	215	2.1645	4.0324e-07
21UR-4026	30.03	65	2.1645	0.00464235
21UR-2558	30.03	65	2.1645	0.00464235
21UR-1986	39.27	84	2.13904	0.00153402
21UR-5142	1210.44	2550	2.10667	1.44947e-63
21UR-14107	41.58	87	2.09235	0.00160758
21UR-1919	637.56	1330	2.08608	2.2166e-33
21UR-9481	152.46	318	2.08579	3.25083e-09
21UR-3194	50.82	106	2.08579	0.000541745
21UR-9881	103.95	216	2.07792	1.09374e-06
21UR-2277678	71.61	148	2.06675	5.59107e-05
21UR-9553	838.53	1730	2.06313	6.806e-42
21UR-3693	161.7	333	2.05937	2.32795e-09
21UR-2336	87.78	180	2.05058	1.10003e-05
21UR-380	43.89	90	2.05058	0.0016744
21UR-8365	85.47	175	2.0475	1.49372e-05
21UR-12451	85.47	175	2.0475	1.49372e-05
21UR-2857	99.33	203	2.04369	3.38582e-06
21UR-7616	32.34	66	2.04082	0.00700511
21UR-8425	1000.23	2040	2.03953	7.10232e-48
21UR-4485	43.89	89	2.0278	0.00199908
21UR-5802	43.89	89	2.0278	0.00199908
21UR-10819	2977.59	6036	2.02714	6.68005e-136
21UR-12820	341.88	689	2.01533	6.42115e-17
21UR-208	143.22	288	2.01089	6.01444e-08
21UR-15688	395.01	794	2.01008	3.88222e-19
21UR-3298	32.34	65	2.00989	0.00837825
21UR-5833	32.34	65	2.00989	0.00837825
21UR-6262	36.96	74	2.00216	0.00522501
21UR-1876	249.48	498	1.99615	1.9356e-12
21UR-57	50.82	101	1.98741	0.00130535
21UR-4978	198.66	393	1.97825	5.71721e-10
21UR-383	78.54	154	1.96078	0.000104042
21UR-4063	418.11	811	1.93968	4.52559e-18
21UR-4032	57.75	112	1.93939	0.00100736
21UR-8144	173.25	335	1.93362	2.42864e-08
21UR-4970	404.25	780	1.9295	3.04966e-17
21UR-537	64.68	122	1.88621	0.000908323
21UR-11543	233.31	435	1.86447	1.34142e-09
21UR-4807	55.44	103	1.85786	0.00264651
21UR-400	48.51	90	1.85529	0.00486415
21UR-79	66.99	124	1.85102	0.00108207
21UR-5182	87.78	162	1.84552	0.000215337
21UR-399	62.37	115	1.84384	0.00169954
21UR-4748	309.54	570	1.84144	9.49291e-12
21UR-6953	683.76	1252	1.83105	1.79636e-23
21UR-554	492.03	900	1.82916	2.58681e-17
21UR-5630	124.74	228	1.8278	1.6335e-05
21UR-2728	138.6	252	1.81818	7.02515e-06
21UR-15577	547.47	995	1.81745	1.16614e-18
21UR-2400	108.57	197	1.8145	6.95071e-05
21UR-9980	46.2	83	1.79654	0.00913008
21UR-5745	385.77	684	1.77308	1.47686e-12
21UR-1476	145.53	256	1.75909	1.50531e-05
21UR-1016	53.13	93	1.75042	0.00784394
21UR-280	152.46	264	1.7316	1.74782e-05
21UR-1021	55.44	96	1.7316	0.00782357
21UR-7623	53.13	92	1.7316	0.00911521
21UR-3336	78.54	136	1.7316	0.00174987
21UR-4509	189.42	327	1.72632	2.11314e-06
21UR-2314	80.85	138	1.70686	0.0020156
21UR-4922	78.54	134	1.70614	0.0023366
21UR-4349	191.73	327	1.70552	3.20636e-06
21UR-11601	76.23	130	1.70537	0.00270972
21UR-3036	73.92	125	1.69102	0.00362652
21UR-14735	200.97	338	1.68184	3.62538e-06
21UR-3702	71.61	119	1.66178	0.0055793
21UR-4728	62.37	103	1.65143	0.0101873
21UR-2560195	120.12	198	1.64835	0.000513113
21UR-10527	115.5	190	1.64502	0.000683989
21UR-3706	78.54	129	1.64248	0.00470286
21UR-12629	140.91	231	1.63934	0.000211533
21UR-3142	515.13	843	1.63648	4.47901e-12
21UR-11976	124.74	204	1.6354	0.000502782
21UR-7654	129.36	211	1.63111	0.000431087
21UR-3850	83.16	135	1.62338	0.00458501
21UR-3575	69.3	112	1.61616	0.00977675
21UR-4253	92.4	149	1.61255	0.00332583
21UR-4864	990.99	1592	1.60647	4.68992e-20
21UR-569	706.86	1134	1.60428	1.02483e-14
21UR-15664	397.32	637	1.60324	5.84181e-09
21UR-1051	1097.25	1758	1.60219	9.12185e-22
21UR-10268	1690.92	2702	1.59795	3.5158e-32
21UR-4459	1526.91	2406	1.57573	1.77727e-27
21UR-2589	237.93	374	1.57189	1.42264e-05
21UR-4338	191.73	300	1.5647	0.000107091
21UR-2689	136.29	213	1.56284	0.00100617
21UR-2477	203.28	316	1.55451	8.72123e-05
21UR-1498	108.57	168	1.54739	0.00380193
21UR-7194	124.74	193	1.54722	0.00203436
21UR-11225	434.28	663	1.52666	6.17803e-08
21UR-6858	159.39	242	1.51829	0.000933941
21UR-11813	1903.44	2882	1.5141	5.32854e-28
21UR-2816	367.29	549	1.49473	2.22094e-06
21UR-1	161.7	241	1.49041	0.00144411
21UR-4972	284.13	423	1.48876	3.4486e-05
21UR-2712	242.55	358	1.47598	0.00017133
21UR-1218	127.05	187	1.47186	0.00568998
21UR-85	207.9	306	1.47186	0.000520073
21UR-5077	274.89	403	1.46604	8.95451e-05
21UR-4537	5708.01	8337	1.46058	3.69769e-66
21UR-1848	489.72	715	1.46002	3.25114e-07
21UR-1258	1007.16	1464	1.45359	7.37373e-13
21UR-1137	473.55	688	1.45286	7.09899e-07
21UR-11883	1011.78	1466	1.44893	1.05302e-12
21UR-6645	425.04	605	1.4234	8.84574e-06
21UR-1731	568.26	805	1.41661	4.70499e-07
21UR-14347	3832.29	5411	1.41195	3.22324e-37
21UR-9849	540.54	761	1.40785	1.37585e-06
21UR-705	358.05	503	1.40483	8.06988e-05
21UR-4899	1051.05	1465	1.39384	1.01009e-10
21UR-1311	214.83	299	1.3918	0.00248236
21UR-5329	2000.46	2783	1.39118	1.1739e-18
21UR-5230	1004.85	1397	1.39026	3.51678e-10
21UR-10640	392.7	545	1.38783	7.15874e-05
21UR-2717643	3125.43	4335	1.38701	1.28372e-27
21UR-10325	226.38	313	1.38263	0.00236936
21UR-2845	168.63	233	1.38172	0.00790613
21UR-6991	173.25	239	1.37951	0.00745191
21UR-4148	164.01	226	1.37796	0.00924138
21UR-4425	4162.62	5700	1.36933	2.33133e-33
21UR-15114	482.79	656	1.35877	4.19111e-05
21UR-15012	214.83	289	1.34525	0.00629491
21UR-12462	300.3	401	1.33533	0.00191239
21UR-8725	288.75	385	1.33333	0.00241587
21UR-225	277.2	368	1.32756	0.00332565
21UR-3651	833.91	1103	1.32268	1.24666e-06
21UR-279	316.47	413	1.30502	0.00327681
21UR-4976	508.2	655	1.28886	0.000485823
21UR-1200	586.74	754	1.28507	0.000226783
21UR-11087	1316.7	1689	1.28275	7.7388e-08
21UR-6785	766.92	981	1.27914	4.04445e-05
21UR-1973912	2723.49	3480	1.27777	4.96494e-14
21UR-4658	930.93	1189	1.27722	7.74487e-06
21UR-6089	836.22	1068	1.27718	2.13971e-05
21UR-908	26535	33694	1.2698	5.69285e-114
21UR-1454	330.33	416	1.25935	0.00857774
21UR-3761	2986.83	3742	1.25283	4.68343e-13
21UR-2037	519.75	649	1.24868	0.00188571
21UR-7208	734.58	906	1.23336	0.000563575
21UR-11965	10766.9	13197	1.2257	1.37904e-34
21UR-3106	517.44	625	1.20787	0.00743224
21UR-2761	7964.88	9564	1.20077	2.66229e-21
21UR-2721	45576.3	54722	1.20067	1.94223e-112
21UR-14355	5382.3	4499	-1.19633	2.85129e-12
21UR-10192	896.28	744	-1.20468	0.00190819
21UR-5597	790.02	652	-1.21169	0.00259441
21UR-1267	3917.76	3222	-1.21594	8.42991e-11
21UR-1687	572.88	470	-1.21889	0.00729795
21UR-11415	695.31	568	-1.22414	0.00294084
21UR-1793	6052.2	4919	-1.23037	2.10363e-17
21UR-4638	1300.53	1046	-1.24334	2.36763e-05
21UR-5357	2658.81	2136	-1.24476	2.26754e-09
21UR-1983	850.08	679	-1.25196	0.000362742
21UR-7129	526.68	419	-1.25699	0.00354847
21UR-5311	595.98	471	-1.26535	0.0015955
21UR-12509	2878.26	2273	-1.26628	2.70003e-11
21UR-11885	6176.94	4858	-1.2715	6.75932e-23
21UR-2935	686.07	535	-1.28237	0.000416554
21UR-2891	1806.42	1407	-1.28388	2.13799e-08
21UR-3215	1314.39	1020	-1.28862	1.1057e-06
21UR-6818	1822.59	1414	-1.28896	1.15726e-08
21UR-5323	831.6	645	-1.2893	8.44192e-05
21UR-15217	1288.98	990	-1.302	5.61814e-07
21UR-212	302.61	231	-1.31	0.00880005
21UR-3372	457.38	348	-1.31431	0.0014746
21UR-5008	1744.05	1326	-1.31527	2.08562e-09
21UR-11802	561.33	425	-1.32078	0.000392192
21UR-7604	887.04	670	-1.32394	9.65543e-06
21UR-4286	348.81	263	-1.32627	0.00381781
21UR-14116	328.02	247	-1.32802	0.00471871
21UR-2875	478.17	358	-1.33567	0.000657481
21UR-7645	23388.8	17486	-1.33757	9.16643e-116
21UR-5464	951.72	707	-1.34614	1.46225e-06
21UR-228	2256.87	1676	-1.34658	2.3649e-13
21UR-3246	4084.08	3021	-1.3519	3.04444e-23
21UR-2266	1704.78	1257	-1.35623	6.67533e-11
21UR-3180	607.53	437	-1.39023	2.03238e-05
21UR-4819	1074.15	769	-1.39681	1.42539e-08
21UR-1839506	3626.7	2596	-1.39703	6.76278e-25
21UR-12690	1905.75	1363	-1.3982	5.47844e-14
21UR-4785	376.53	269	-1.39974	0.000525221
21UR-2052	3767.61	2686	-1.40268	2.48497e-26
21UR-10590	540.54	382	-1.41503	2.43913e-05
21UR-3224	1716.33	1182	-1.45206	3.50905e-15
21UR-2290	173.25	119	-1.45588	0.00754919
21UR-5596	1337.49	911	-1.46816	8.69975e-13
21UR-13341	762.3	516	-1.47733	3.49576e-08
21UR-2275	7029.33	4755	-1.4783	2.43863e-61
21UR-6433	1300.53	877	-1.48293	5.31079e-13
21UR-8240	258.72	174	-1.4869	0.000807929
21UR-5472	180.18	121	-1.48909	0.00438804
21UR-4171	2802.03	1876	-1.49362	8.85713e-27
21UR-3387	279.51	187	-1.49471	0.000447274
21UR-1069	332.64	222	-1.49838	0.000129399
21UR-3380	170.94	114	-1.49947	0.00478684
21UR-2486	1494.57	994	-1.50359	1.57664e-15
21UR-3430	277.2	184	-1.50652	0.000378995
21UR-7737	893.97	593	-1.50754	4.61507e-10
21UR-8403	295.68	196	-1.50857	0.000239495
21UR-6085	586.74	388	-1.51222	3.15004e-07
21UR-3601	168.63	111	-1.51919	0.00402576
21UR-5520	177.87	116	-1.53336	0.00270581
21UR-5648	586.74	381	-1.54	1.09336e-07
21UR-1612	233.31	151	-1.5451	0.000564365
21UR-6408	224.07	145	-1.54531	0.000711941
21UR-1779	616.77	399	-1.54579	4.21298e-08
21UR-7255	4164.93	2682	-1.55292	1.14247e-45
21UR-9195	1471.47	945	-1.55711	1.66946e-17
21UR-1315	200.97	129	-1.55791	0.00108316
21UR-13403	579.81	372	-1.55863	6.36772e-08
21UR-5901	191.73	123	-1.55878	0.00136919
21UR-6424	415.8	265	-1.56906	3.05559e-06
21UR-12910	189.42	119	-1.59176	0.000948177
21UR-304	450.45	281	-1.60302	4.4591e-07
21UR-4181	247.17	154	-1.605	0.000145464
21UR-3871	254.1	158	-1.60823	0.000112351
21UR-4835	854.7	530	-1.61264	3.11693e-12
21UR-1842	390.39	242	-1.61318	1.87938e-06
21UR-4433	173.25	107	-1.61916	0.00109013
21UR-6615	120.12	74	-1.62324	0.00555882
21UR-8795	237.93	146	-1.62966	0.000127618
21UR-10319	106.26	65	-1.63477	0.0079727
21UR-3511	117.81	72	-1.63625	0.00537011
21UR-3545	572.88	348	-1.64621	2.71065e-09
21UR-3978	1919.61	1164	-1.64915	2.62416e-27
21UR-2745191	1057.98	641	-1.65051	6.8303e-16
21UR-9610	295.68	179	-1.65184	1.38445e-05
21UR-4502	563.64	341	-1.6529	2.80088e-09
21UR-2710	1055.67	636	-1.65986	3.80643e-16
21UR-5350	106.26	64	-1.66031	0.00656534
21UR-6094	94.71	57	-1.66158	0.00977802
21UR-11506	681.45	410	-1.66207	4.61642e-11
21UR-5107	256.41	154	-1.665	3.8807e-05
21UR-10057	187.11	112	-1.67063	0.000364974
21UR-10526	450.45	269	-1.67454	5.1139e-08
21UR-1871	286.44	169	-1.69491	8.01067e-06
21UR-1797176	168.63	99	-1.70333	0.000467416
21UR-1578	321.09	188	-1.70793	1.801e-06
21UR-1719	203.28	119	-1.70824	0.000124007
21UR-3809	131.67	77	-1.71	0.00171423
21UR-5706	2663.43	1554	-1.71392	3.97018e-42
21UR-7142	2083.62	1210	-1.722	7.33395e-34
21UR-1925791	378.84	220	-1.722	1.61192e-07
21UR-1294	127.05	73	-1.74041	0.00155243
21UR-1705	242.55	139	-1.74496	1.61705e-05
21UR-4684	9249.24	5295	-1.74679	5.153e-150
21UR-877	152.46	87	-1.75241	0.000500282
21UR-11391	309.54	176	-1.75875	9.26715e-07
21UR-5101	718.41	407	-1.76514	9.81276e-14
21UR-531	411.18	231	-1.78	9.84877e-09
21UR-4589	702.24	391	-1.79601	4.24558e-14
21UR-9122	92.4	51	-1.81176	0.00391294
21UR-3242	563.64	311	-1.81235	6.49666e-12
21UR-14356	1258.95	684	-1.84057	1.55956e-25
21UR-1727	140.91	76	-1.85408	0.000291677
21UR-3085	896.28	480	-1.86725	2.18212e-19
21UR-1486	5599.44	2996	-1.86897	1.67225e-111
21UR-5954	78.54	42	-1.87	0.00534143
21UR-4882	552.09	295	-1.87149	1.1616e-12
21UR-6750	792.33	423	-1.87312	1.78e-17
21UR-3072	328.02	175	-1.8744	3.38788e-08
21UR-5454	212.52	113	-1.88071	7.05844e-06
21UR-12002	131.67	70	-1.881	0.000352338
21UR-467	1148.07	610	-1.88208	7.85109e-25
21UR-12377	164.01	87	-1.88517	6.93593e-05
21UR-562	753.06	393	-1.91618	1.21898e-17
21UR-798	124.74	65	-1.91908	0.000356016
21UR-1703	639.87	333	-1.92153	2.408e-15
21UR-507	1134.21	584	-1.94214	1.56911e-26
21UR-1181	87.78	45	-1.95067	0.00203815
21UR-1837	87.78	45	-1.95067	0.00203815
21UR-13691	346.5	177	-1.95763	2.03383e-09
21UR-528	92.4	47	-1.96596	0.00143071
21UR-14131	80.85	41	-1.97195	0.00265466
21UR-6169	261.03	132	-1.9775	1.25789e-07
21UR-15571	323.4	163	-1.98405	3.82321e-09
21UR-2542	87.78	44	-1.995	0.0015536
21UR-3913	73.92	37	-1.99784	0.00345558
21UR-2546829	90.09	45	-2.002	0.00129985
21UR-4890	122.43	61	-2.00705	0.000190928
21UR-975	492.03	245	-2.00829	2.00767e-13
21UR-8602	108.57	54	-2.01056	0.000415524
21UR-12908	311.85	155	-2.01194	3.983e-09
21UR-3425	80.85	40	-2.02125	0.00201096
21UR-8148	219.45	108	-2.03194	5.32338e-07
21UR-5727	1166.55	574	-2.03232	2.89466e-30
21UR-1332	6364.05	3130	-2.03324	1.61217e-156
21UR-1535	122.43	60	-2.0405	0.000144382
21UR-635	87.78	43	-2.0414	0.00117241
21UR-1052	73.92	36	-2.05333	0.00259823
21UR-213	73.92	36	-2.05333	0.00259823
21UR-7559	55.44	27	-2.05333	0.0084603
21UR-4434	508.2	247	-2.05749	1.56998e-14
21UR-4426	191.73	93	-2.06161	1.81266e-06
21UR-2683	60.06	29	-2.07103	0.0058303
21UR-1219	182.49	88	-2.07375	2.72426e-06
21UR-15338	1057.98	510	-2.07447	6.8435e-29
21UR-2714	168.63	81	-2.08185	5.79781e-06
21UR-471	9759.75	4686	-2.08275	1.45255e-252
21UR-8509	66.99	32	-2.09344	0.00334771
21UR-6893	66.99	32	-2.09344	0.00334771
21UR-11712	270.27	129	-2.09512	9.14687e-09
21UR-6254	90.09	43	-2.09512	0.000731026
21UR-6987	136.29	65	-2.09677	3.75824e-05
21UR-8662	69.3	33	-2.1	0.00278491
21UR-1413	115.5	55	-2.1	0.000137484
21UR-6400	71.61	34	-2.10618	0.00231764
21UR-4287	150.15	71	-2.11479	1.30716e-05
21UR-1339	200.97	95	-2.11547	5.06542e-07
21UR-4204	76.23	36	-2.1175	0.00160693
21UR-11901	258.72	122	-2.12066	1.20483e-08
21UR-3156	78.54	37	-2.1227	0.00133873
21UR-9842	242.55	114	-2.12763	3.00293e-08
21UR-8660	110.88	52	-2.13231	0.000145402
21UR-806	256.41	120	-2.13675	1.0632e-08
21UR-7579	1113.42	521	-2.13708	2.77659e-32
21UR-4234	60.06	28	-2.145	0.00429503
21UR-12283	62.37	29	-2.15069	0.00356477
21UR-209	66.99	31	-2.16097	0.00245949
21UR-2784	1575.42	727	-2.16702	3.18071e-46
21UR-2698316	106.26	49	-2.16857	0.000152846
21UR-3244	71.61	33	-2.17	0.00170012
21UR-6501	431.97	198	-2.18167	4.02386e-14
21UR-4107	85.47	39	-2.19154	0.000566817
21UR-2826	658.35	300	-2.1945	7.08561e-21
21UR-1531	90.09	41	-2.19732	0.000394061
21UR-8188	92.4	42	-2.2	0.000328704
21UR-2955	94.71	43	-2.20256	0.000274259
21UR-2641809	191.73	87	-2.20379	2.99757e-07
21UR-8542	3515.82	1595	-2.20428	2.37378e-104
21UR-4021	48.51	22	-2.205	0.00800345
21UR-2309	53.13	24	-2.21375	0.00547351
21UR-5445	53.13	24	-2.21375	0.00547351
21UR-8770	53.13	24	-2.21375	0.00547351
21UR-13046	110.88	50	-2.2176	7.77064e-05
21UR-6096	55.44	25	-2.2176	0.00453184
21UR-3455	364.98	164	-2.22549	1.24381e-12
21UR-3538	62.37	28	-2.2275	0.00258261
21UR-6682	62.37	28	-2.2275	0.00258261
21UR-7079	64.68	29	-2.23034	0.00214375
21UR-5401	64.68	29	-2.23034	0.00214375
21UR-2584780	131.67	59	-2.23169	1.55609e-05
21UR-2660	157.08	70	-2.244	2.21224e-06
21UR-2513	85.47	38	-2.24921	0.000409356
21UR-524	97.02	43	-2.25628	0.000165141
21UR-6303	207.9	92	-2.25978	4.61973e-08
21UR-5387	431.97	191	-2.26162	4.39297e-15
21UR-147	115.5	51	-2.26471	3.91279e-05
21UR-13559	619.08	272	-2.27603	3.93191e-21
21UR-1353	177.87	78	-2.28038	3.254e-07
21UR-5468	452.76	197	-2.29827	3.46995e-16
21UR-2343	429.66	186	-2.31	1.39211e-15
21UR-1342	332.64	144	-2.31	1.97214e-12
21UR-9586	97.02	42	-2.31	0.000117836
21UR-2026	76.23	33	-2.31	0.000606784
21UR-2506242	55.44	24	-2.31	0.003228
21UR-7735	53.13	23	-2.31	0.00389826
21UR-3056	48.51	21	-2.31	0.00569864
21UR-4694	41.58	18	-2.31	0.0101433
21UR-2467	152.46	65	-2.34554	1.14895e-06
21UR-3495	110.88	47	-2.35915	2.82562e-05
21UR-8934	99.33	42	-2.365	6.94047e-05
21UR-3558	80.85	34	-2.37794	0.000295883
21UR-1161	80.85	34	-2.37794	0.000295883
21UR-1588	212.52	89	-2.38787	5.92026e-09
21UR-3872	62.37	26	-2.39885	0.00128843
21UR-2603	57.75	24	-2.40625	0.00186984
21UR-6753	55.44	23	-2.41043	0.00225452
21UR-2688	103.95	43	-2.41744	3.38101e-05
21UR-1270	46.2	19	-2.43158	0.0047982
21UR-13875	117.81	48	-2.45437	8.01905e-06
21UR-8227	78.54	32	-2.45438	0.000246052
21UR-7848	39.27	16	-2.45438	0.0085324
21UR-6284	39.27	16	-2.45438	0.0085324
21UR-11623	73.92	30	-2.464	0.000354152
21UR-3559	94.71	38	-2.49237	4.77119e-05
21UR-2883	57.75	23	-2.51087	0.00128104
21UR-5109	18923.5	7527	-2.51409	0
21UR-3213	1205.82	479	-2.51737	3.23494e-47
21UR-3935	101.64	40	-2.541	1.90103e-05
21UR-8285	930.93	366	-2.54352	1.66318e-37
21UR-7498	224.07	88	-2.54625	2.68904e-10
21UR-9525	99.33	39	-2.54692	2.27028e-05
21UR-15172	94.71	37	-2.55973	3.23884e-05
21UR-2646464	46.2	18	-2.56667	0.00325371
21UR-4739	46.2	18	-2.56667	0.00325371
21UR-1193	66.99	26	-2.57654	0.000414789
21UR-6194	66.99	26	-2.57654	0.000414789
21UR-12623	43.89	17	-2.58176	0.00392751
21UR-9505	43.89	17	-2.58176	0.00392751
21UR-1804	2379.3	920	-2.5862	1.83236e-95
21UR-5536	210.21	81	-2.59519	5.09087e-10
21UR-2743	972.51	372	-2.61427	7.46875e-41
21UR-1892	39.27	15	-2.618	0.00573485
21UR-923	57.75	22	-2.625	0.000859018
21UR-7829	261.03	99	-2.63667	2.41837e-12
21UR-13361	36.96	14	-2.64	0.00693797
21UR-15675	36.96	14	-2.64	0.00693797
21UR-14953	34.65	13	-2.66538	0.00840071
21UR-5705	325.71	122	-2.66975	2.81587e-15
21UR-12351	48.51	18	-2.695	0.00178644
21UR-7673	64.68	24	-2.695	0.000329171
21UR-2540	133.98	49	-2.73429	2.15758e-07
21UR-8611	161.7	59	-2.74068	1.20502e-08
21UR-2574	873.18	318	-2.74585	1.00638e-39
21UR-7253	85.47	31	-2.7571	2.8677e-05
21UR-6431	859.32	311	-2.76309	1.75059e-39
21UR-5560	124.74	45	-2.772	4.25493e-07
21UR-4656	92.4	33	-2.8	1.10482e-05
21UR-4743	39.27	14	-2.805	0.00372967
21UR-10772	39.27	14	-2.805	0.00372967
21UR-10072	39.27	14	-2.805	0.00372967
21UR-1251	113.19	40	-2.82975	9.89736e-07
21UR-1526	36.96	13	-2.84308	0.00448508
21UR-258	85.47	30	-2.849	1.84368e-05
21UR-8544	60.06	21	-2.86	0.000302435
21UR-2576	60.06	21	-2.86	0.000302435
21UR-1688	34.65	12	-2.8875	0.00539367
21UR-4428	34.65	12	-2.8875	0.00539367
21UR-35	46.2	16	-2.8875	0.00137465
21UR-7015	46.2	16	-2.8875	0.00137465
21UR-4273	113.19	39	-2.90231	6.29729e-07
21UR-3699	55.44	19	-2.91789	0.000428294
21UR-4117	43.89	15	-2.926	0.00164203
21UR-12608	32.34	11	-2.94	0.00648572
21UR-5637	32.34	11	-2.94	0.00648572
21UR-504	170.94	58	-2.94724	6.69068e-10
21UR-3727	106.26	36	-2.95167	1.03232e-06
21UR-2545	348.81	118	-2.95602	1.19729e-18
21UR-9015	328.02	110	-2.982	7.85814e-18
21UR-3026	48.51	16	-3.03187	0.000718422
21UR-46	124.74	41	-3.04244	6.79538e-08
21UR-4986	207.9	68	-3.05735	3.07798e-12
21UR-1790254	358.05	117	-3.06026	5.97295e-20
21UR-4347	83.16	27	-3.08	8.48335e-06
21UR-12393	27.72	9	-3.08	0.00936749
21UR-10914	27.72	9	-3.08	0.00936749
21UR-130	71.61	23	-3.11348	3.11673e-05
21UR-5312	78.54	25	-3.1416	1.16792e-05
21UR-5768	34.65	11	-3.15	0.00331816
21UR-5852	41.58	13	-3.19846	0.00119337
21UR-1794	73.92	23	-3.21391	1.59999e-05
21UR-3235	686.07	213	-3.22099	4.44276e-39
21UR-4873	48.51	15	-3.234	0.000433933
21UR-4910	48.51	15	-3.234	0.000433933
21UR-11608	64.68	20	-3.234	5.02418e-05
21UR-7940	32.34	10	-3.234	0.00394289
21UR-2159	71.61	22	-3.255	1.86853e-05
21UR-2979	71.61	22	-3.255	1.86853e-05
21UR-14294	39.27	12	-3.2725	0.00140833
21UR-2863	937.86	286	-3.27923	6.47948e-54
21UR-7750	62.37	19	-3.28263	5.87173e-05
21UR-5065	60.06	18	-3.33667	6.84822e-05
21UR-366	50.82	15	-3.388	0.00021718
21UR-6774	34.65	10	-3.465	0.00194496
21UR-15623	34.65	10	-3.465	0.00194496
21UR-6346	34.65	10	-3.465	0.00194496
21UR-13776	34.65	10	-3.465	0.00194496
21UR-7916	27.72	8	-3.465	0.00552292
21UR-6419	53.13	15	-3.542	0.000106937
21UR-4826	32.34	9	-3.59333	0.00227218
21UR-12891	57.75	16	-3.60938	4.52508e-05
21UR-12855	25.41	7	-3.63	0.00649582
21UR-2508	25.41	7	-3.63	0.00649582
21UR-5041	1168.86	314	-3.72248	4.57088e-77
21UR-3988	30.03	8	-3.75375	0.00263948
21UR-3562	41.58	11	-3.78	0.000388339
21UR-12756	23.1	6	-3.85	0.00758958
21UR-6708	23.1	6	-3.85	0.00758958
21UR-970	23.1	6	-3.85	0.00758958
21UR-12478	27.72	7	-3.96	0.00304284
21UR-1415	71.61	18	-3.97833	1.83729e-06
21UR-32	836.22	207	-4.03971	1.85517e-60
21UR-30	48.51	12	-4.0425	7.5593e-05
21UR-3210	48.51	12	-4.0425	7.5593e-05
21UR-7393	99.33	24	-4.13875	1.0356e-08
21UR-12966	20.79	5	-4.158	0.00878031
21UR-4457	20.79	5	-4.158	0.00878031
21UR-14482	20.79	5	-4.158	0.00878031
21UR-2464	20.79	5	-4.158	0.00878031
21UR-8787	50.82	12	-4.235	3.49026e-05
21UR-2168	25.41	6	-4.235	0.00347086
21UR-9929	25.41	6	-4.235	0.00347086
21UR-2385	64.68	15	-4.312	2.50289e-06
21UR-710	99.33	23	-4.3187	5.25238e-09
21UR-9020	267.96	61	-4.39279	4.2504e-22
21UR-7575	23.1	5	-4.62	0.00389941
21UR-1022	18.48	4	-4.62	0.0100029
21UR-6503	18.48	4	-4.62	0.0100029
21UR-2156	18.48	4	-4.62	0.0100029
21UR-10506	18.48	4	-4.62	0.0100029
21UR-6195	18.48	4	-4.62	0.0100029
21UR-5225	18.48	4	-4.62	0.0100029
21UR-2573	18.48	4	-4.62	0.0100029
21UR-10698	18.48	4	-4.62	0.0100029
21UR-4304	18.48	4	-4.62	0.0100029
21UR-13415	18.48	4	-4.62	0.0100029
21UR-9906	64.68	14	-4.62	1.22903e-06
21UR-2043	32.34	7	-4.62	0.000620199
21UR-14620	43.89	9	-4.87667	4.50703e-05
21UR-368	25.41	5	-5.082	0.00168531
21UR-8694	20.79	4	-5.1975	0.00428232
21UR-5415	36.96	7	-5.28	0.000116471
21UR-7030	32.34	6	-5.39	0.000286712
21UR-13599	27.72	5	-5.544	0.00071137
21UR-6805	27.72	5	-5.544	0.00071137
21UR-6378	27.72	5	-5.544	0.00071137
21UR-3205	297.99	53	-5.62245	1.93128e-29
21UR-994	46.2	8	-5.775	8.49613e-06
21UR-918	23.1	4	-5.775	0.00178344
21UR-4044	23.1	4	-5.775	0.00178344
21UR-9212	23.1	4	-5.775	0.00178344
21UR-13541	23.1	4	-5.775	0.00178344
21UR-2327	64.68	11	-5.88	1.08879e-07
21UR-4498	36.96	6	-6.16	4.9372e-05
21UR-3678	18.48	3	-6.16	0.00453584
21UR-9692	18.48	3	-6.16	0.00453584
21UR-7677	18.48	3	-6.16	0.00453584
21UR-6108	18.48	3	-6.16	0.00453584
21UR-4483	293.37	47	-6.24191	4.75561e-31
21UR-3335	25.41	4	-6.3525	0.000725447
21UR-7988	25.41	4	-6.3525	0.000725447
21UR-3461	420.42	64	-6.56906	3.43436e-45
21UR-4473	194.04	28	-6.93	2.23335e-22
21UR-4403	41.58	6	-6.93	8.00523e-06
21UR-619	36.96	5	-7.392	1.87668e-05
21UR-3332	23.1	3	-7.7	0.000700114
21UR-4535	16.17	2	-8.085	0.00451306
21UR-11837	16.17	2	-8.085	0.00451306
21UR-260	16.17	2	-8.085	0.00451306
21UR-11195	16.17	2	-8.085	0.00451306
21UR-1102	25.41	3	-8.47	0.000266786
21UR-12545	34.65	4	-8.6625	1.65941e-05
21UR-3492	27.72	3	-9.24	0.0001
21UR-9612	18.48	2	-9.24	0.00168599
21UR-6508	9.24	0	-9.24	0.00836426
21UR-7315	9.24	0	-9.24	0.00836426
21UR-10946	9.24	0	-9.24	0.00836426
21UR-2154	9.24	0	-9.24	0.00836426
21UR-14918	9.24	0	-9.24	0.00836426
21UR-5033	9.24	0	-9.24	0.00836426
21UR-9333	9.24	0	-9.24	0.00836426
21UR-13614	9.24	0	-9.24	0.00836426
21UR-13731	9.24	0	-9.24	0.00836426
21UR-5624	9.24	0	-9.24	0.00836426
21UR-6665	9.24	0	-9.24	0.00836426
21UR-13518	9.24	0	-9.24	0.00836426
21UR-10000	9.24	0	-9.24	0.00836426
21UR-4941	20.79	2	-10.395	0.000617292
21UR-3594	9203.04	810	-11.3618	0
21UR-14402	11.55	0	-11.55	0.0025295
21UR-5982	11.55	0	-11.55	0.0025295
21UR-2733	11.55	0	-11.55	0.0025295
21UR-14458	11.55	0	-11.55	0.0025295
21UR-13711	11.55	0	-11.55	0.0025295
21UR-10981	11.55	0	-11.55	0.0025295
21UR-3445	11.55	0	-11.55	0.0025295
21UR-6948	11.55	0	-11.55	0.0025295
21UR-11940	11.55	0	-11.55	0.0025295
21UR-4345	11.55	0	-11.55	0.0025295
21UR-2851	25.41	2	-12.705	7.89285e-05
21UR-7266	27.72	2	-13.86	2.76946e-05
21UR-2744854	13.86	0	-13.86	0.000764964
21UR-2228	13.86	0	-13.86	0.000764964
21UR-10359	13.86	1	-13.86	0.00396672
21UR-6887	13.86	1	-13.86	0.00396672
21UR-6940	13.86	1	-13.86	0.00396672
21UR-6264	200.97	13	-15.4592	4.57102e-32
21UR-3574	16.17	0	-16.17	0.000231339
21UR-777	16.17	0	-16.17	0.000231339
21UR-11425	16.17	0	-16.17	0.000231339
21UR-5848	16.17	1	-16.17	0.00136098
21UR-3435	16.17	1	-16.17	0.00136098
21UR-5601	16.17	1	-16.17	0.00136098
21UR-3177	20.79	1	-20.79	0.000153988

## Sheet: adr-2
piRNA	Normalized # of WT reads	Normalized # of adr-2 reads	Fold change (adr-2 vs wt)	pVal
21UR-1354	1	11	10.7	0.00562536
21UR-2232	1	10	9.51	0.0110493
21UR-8749	1	8	8.32	0.0214797
21UR-4531	0	7	7.13	0.00975355
21UR-976	0	7	7.13	0.00975355
21UR-7405	0	7	7.13	0.00975355
21UR-3210	0	7	7.13	0.00975355
21UR-8835	1	7	7.13	0.0412244
21UR-6025	1	7	7.13	0.0412244
21UR-1002	1	7	7.13	0.0412244
21UR-8265	1	7	7.13	0.0412244
21UR-4934	1	7	7.13	0.0412244
21UR-9134	0	6	5.94	0.021101
21UR-9740	0	6	5.94	0.021101
21UR-3343	0	6	5.94	0.021101
21UR-2373	0	6	5.94	0.021101
21UR-6601	0	6	5.94	0.021101
21UR-4879	0	6	5.94	0.021101
21UR-13252	0	6	5.94	0.021101
21UR-2722	0	6	5.94	0.021101
21UR-3335	2	11	5.35	0.018161
21UR-6636	2	11	5.35	0.018161
21UR-6449	2	11	5.35	0.018161
21UR-8458	3	15	5.15	0.00462019
21UR-5852	0	5	4.76	0.0456501
21UR-1357	0	5	4.76	0.0456501
21UR-6477	0	5	4.76	0.0456501
21UR-9246	0	5	4.76	0.0456501
21UR-8314	0	5	4.76	0.0456501
21UR-817	0	5	4.76	0.0456501
21UR-9383	0	5	4.76	0.0456501
21UR-2874	0	5	4.76	0.0456501
21UR-7288	0	5	4.76	0.0456501
21UR-12851	0	5	4.76	0.0456501
21UR-1926854	0	5	4.76	0.0456501
21UR-4239	0	5	4.76	0.0456501
21UR-6753	0	5	4.76	0.0456501
21UR-477	0	5	4.76	0.0456501
21UR-11521	3	14	4.76	0.00824024
21UR-2077	2	10	4.76	0.0327451
21UR-3559	2	10	4.76	0.0327451
21UR-10328	3	12	3.96	0.0251556
21UR-10694	4	14	3.57	0.0191004
21UR-2636	4	14	3.57	0.0191004
21UR-9096	4	14	3.57	0.0191004
21UR-5943	3	11	3.57	0.0428789
21UR-5166	5	17	3.33	0.014439
21UR-7043	4	13	3.27	0.0317353
21UR-12167	4	13	3.27	0.0317353
21UR-2404	8	24	2.97	0.00621142
21UR-1156	4	12	2.97	0.0517805
21UR-5361	4	12	2.97	0.0517805
21UR-5021	4	12	2.97	0.0517805
21UR-2708	4	12	2.97	0.0517805
21UR-14169	4	12	2.97	0.0517805
21UR-6067	4	12	2.97	0.0517805
21UR-4352	7	20	2.89	0.0130855
21UR-5595	5	14	2.85	0.0377892
21UR-8358	17	45	2.66	0.000515091
21UR-7616	6	15	2.58	0.0432949
21UR-311	7	18	2.55	0.0317396
21UR-5061	8	20	2.53	0.0234119
21UR-4130	13	32	2.47	0.00541974
21UR-2718	10	24	2.38	0.0193941
21UR-8277	7	17	2.38	0.0482709
21UR-4785	7	17	2.38	0.0482709
21UR-11168	14	32	2.29	0.00892867
21UR-4022	16	36	2.23	0.00735352
21UR-1055	8	18	2.23	0.0527532
21UR-9992	10	21	2.14	0.0419843
21UR-8402	11	23	2.05	0.0448799
21UR-3848	73	149	2.04	1.27e-06
21UR-3659	29	58	2.01	0.00234407
21UR-4190	23	44	1.91	0.0116212
21UR-470	17	31	1.82	0.0427932
21UR-1731	220	399	1.82	1.24e-11
21UR-3322	20	36	1.78	0.0350868
21UR-13680	25	40	1.62	0.0521128
21UR-2309	47	73	1.54	0.0207231
21UR-2545	54	82	1.52	0.0177257
21UR-3103	148	223	1.51	0.000218604
21UR-7829	83	125	1.5	0.00507476
21UR-12910	86	126	1.47	0.00773819
21UR-10047	63	92	1.45	0.0230033
21UR-1476	54	78	1.45	0.0332964
21UR-14735	82	111	1.35	0.0393775
21UR-5728	97	131	1.35	0.0271975
21UR-3702	117	155	1.32	0.0253747
21UR-3380	129	165	1.28	0.0367852
21UR-4899	1275	1631	1.28	4.24e-09
21UR-7070	180	227	1.26	0.0240083
21UR-15012	234	295	1.26	0.0121038
21UR-4978	341	420	1.23	0.00795174
21UR-2000	258	316	1.23	0.0207625
21UR-5045	256	311	1.22	0.0260573
21UR-3235	405	489	1.21	0.00973109
21UR-602	1297	1559	1.2	1.91e-05
21UR-116	251	209	-1.20482	0.0211215
21UR-13367	540	449	-1.20482	0.00117098
21UR-2014236	193	160	-1.20482	0.0368496
21UR-1779	489	405	-1.20482	0.00162162
21UR-14355	5887	4876	-1.20482	1.77e-25
21UR-3242	372	307	-1.21951	0.00437659
21UR-14	199	164	-1.21951	0.0292501
21UR-518	182	150	-1.21951	0.0345376
21UR-9811	394	323	-1.21951	0.00292633
21UR-3978	693	568	-1.21951	0.000111223
21UR-2761	2496	2045	-1.21951	7.34e-13
21UR-4748	1359	1113	-1.21951	8.75e-08
21UR-2843	397	325	-1.21951	0.00244694
21UR-467	361	295	-1.21951	0.00356414
21UR-11813	717	584	-1.23457	5.37e-05
21UR-1868	177	144	-1.23457	0.0292001
21UR-864	183	149	-1.23457	0.0266096
21UR-3926	680	550	-1.23457	5.66e-05
21UR-1618	739	597	-1.23457	2.4e-05
21UR-4433	212	171	-1.23457	0.0162387
21UR-3642	487	392	-1.23457	0.000449355
21UR-1705	189	152	-1.23457	0.0208225
21UR-12462	449	361	-1.25	0.000697282
21UR-15688	532	427	-1.25	0.000206915
21UR-5648	810	648	-1.25	4.89e-06
21UR-11000	3461	2766	-1.25	1.61e-20
21UR-4883	180	144	-1.25	0.0204343
21UR-10325	128	102	-1.25	0.0438943
21UR-2589	262	209	-1.25	0.00627017
21UR-225	230	183	-1.25	0.00908457
21UR-13337	169	134	-1.26582	0.0217442
21UR-5323	190	151	-1.26582	0.0157481
21UR-552	413	328	-1.26582	0.000640167
21UR-2563	280	222	-1.26582	0.00411736
21UR-2826	292	232	-1.26582	0.00345554
21UR-3215	911	723	-1.26582	6.52e-07
21UR-2845	283	223	-1.26582	0.00336249
21UR-9553	250	197	-1.26582	0.00545371
21UR-5101	232	183	-1.26582	0.0071177
21UR-12820	721	567	-1.26582	4.53e-06
21UR-7463	112	88	-1.26582	0.0452734
21UR-1200	282	221	-1.28205	0.0027483
21UR-5503	1859	1456	-1.28205	1.96e-13
21UR-6408	120	94	-1.28205	0.0374913
21UR-4835	379	296	-1.28205	0.000522369
21UR-4340	367	287	-1.28205	0.000619004
21UR-388	259	202	-1.28205	0.00343682
21UR-13388	119	93	-1.28205	0.0358836
21UR-4943	814	634	-1.28205	4.95e-07
21UR-3775	208	162	-1.28205	0.00726667
21UR-3470	680	528	-1.28205	3.23e-06
21UR-4723	118	92	-1.28205	0.0343132
21UR-2891	532	413	-1.28205	3.21e-05
21UR-4402	307	238	-1.2987	0.00122793
21UR-4509	175	136	-1.2987	0.0118929
21UR-1632	2907	2250	-1.2987	1.51e-21
21UR-4861	1055	816	-1.2987	5.58e-09
21UR-2717643	705	544	-1.2987	1.48e-06
21UR-10617	168	130	-1.2987	0.0124489
21UR-8310	250	193	-1.2987	0.00277711
21UR-7654	139	107	-1.2987	0.0205572
21UR-3370	192	147	-1.2987	0.00727148
21UR-4238	264	202	-1.2987	0.00179485
21UR-11915	87	67	-1.2987	0.0531563
21UR-628	903	687	-1.31579	1.37e-08
21UR-1595	111	84	-1.31579	0.0297676
21UR-15352	180	137	-1.31579	0.0072095
21UR-7579	311	235	-1.31579	0.000508451
21UR-2816	310	234	-1.31579	0.000484819
21UR-3969	181	137	-1.31579	0.00626223
21UR-2594170	137	103	-1.33333	0.0154349
21UR-11543	82	62	-1.33333	0.0504032
21UR-1332	172	130	-1.33333	0.00713068
21UR-85	98	74	-1.33333	0.0341049
21UR-4063	160	120	-1.33333	0.00847992
21UR-14967	366	275	-1.33333	0.000122026
21UR-4425	642	481	-1.33333	5.04e-07
21UR-2784	108	81	-1.33333	0.0255179
21UR-6814	140	105	-1.33333	0.0121092
21UR-294	594	443	-1.33333	9.39e-07
21UR-10640	222	165	-1.35135	0.00184328
21UR-7208	155	115	-1.35135	0.0079769
21UR-9206	211	157	-1.35135	0.0022895
21UR-7604	104	77	-1.35135	0.0252958
21UR-3721	149	111	-1.35135	0.00868731
21UR-3029	207	153	-1.35135	0.00226311
21UR-1078	159	118	-1.35135	0.00658332
21UR-2275	3032	2243	-1.35135	5.45e-29
21UR-1740	119	88	-1.35135	0.0164348
21UR-3761	800	591	-1.35135	5.47e-09
21UR-10268	1857	1371	-1.35135	1.09e-18
21UR-1218	116	86	-1.35135	0.017166
21UR-6818	263	194	-1.35135	0.000547535
21UR-1258	517	380	-1.35135	1.83e-06
21UR-3078	454	333	-1.36986	6e-06
21UR-1453	73	53	-1.36986	0.046851
21UR-5565	398	290	-1.36986	1.58e-05
21UR-12261	160	117	-1.36986	0.00458194
21UR-3733	255	185	-1.36986	0.000431719
21UR-2052	188	137	-1.36986	0.00221724
21UR-6089	90	65	-1.36986	0.0269132
21UR-1839506	154	112	-1.36986	0.00496397
21UR-7562	69	50	-1.38889	0.046135
21UR-3717	79	57	-1.38889	0.0340709
21UR-1124	89	64	-1.38889	0.025307
21UR-9481	66	48	-1.38889	0.048264
21UR-3106	603	434	-1.38889	5.27e-08
21UR-3471	76	55	-1.38889	0.0355889
21UR-1190	174	125	-1.38889	0.00229778
21UR-8465	78	56	-1.38889	0.0319705
21UR-8141	201	144	-1.38889	0.00105419
21UR-4369	103	74	-1.38889	0.0153414
21UR-12908	85	61	-1.40845	0.0247584
21UR-1973912	209	149	-1.40845	0.000710722
21UR-13183	413	294	-1.40845	3.01e-06
21UR-3963	144	102	-1.40845	0.00419337
21UR-11415	465	328	-1.40845	4.83e-07
21UR-279	1040	733	-1.40845	8.78e-14
21UR-4737	295	208	-1.40845	5.04e-05
21UR-1050	66	46	-1.42857	0.0378007
21UR-400	83	58	-1.42857	0.021641
21UR-11790	56	39	-1.42857	0.0514388
21UR-5381	56	39	-1.42857	0.0514388
21UR-8240	90	63	-1.42857	0.0167892
21UR-7174	85	59	-1.42857	0.0194223
21UR-13730	9757	6821	-1.42857	1.56e-118
21UR-7645	455	317	-1.42857	3.18e-07
21UR-1137	328	228	-1.42857	1.12e-05
21UR-15217	940	653	-1.44928	1.82e-13
21UR-4287	108	75	-1.44928	0.00822758
21UR-6007	86	59	-1.44928	0.0162207
21UR-8472	62	43	-1.44928	0.0365839
21UR-3801	166	114	-1.44928	0.00106879
21UR-10057	182	125	-1.44928	0.000599954
21UR-14299	78	53	-1.44928	0.0194341
21UR-5142	404	277	-1.44928	5.29e-07
21UR-5170	222	152	-1.44928	0.000162456
21UR-7142	301	206	-1.47059	1.15e-05
21UR-7129	536	366	-1.47059	6.72e-09
21UR-1623	162	111	-1.47059	0.00102449
21UR-5109	1313	895	-1.47059	1.57e-19
21UR-1845094	1035	704	-1.47059	6.25e-16
21UR-10590	219	149	-1.47059	0.00013036
21UR-11885	5803	3922	-1.47059	7.38e-83
21UR-8611	53	36	-1.49254	0.0408554
21UR-1342	46	31	-1.49254	0.0536359
21UR-15382	147	99	-1.49254	0.00118235
21UR-4976	273	183	-1.49254	1.36e-05
21UR-3651	564	378	-1.49254	6.2e-10
21UR-849	518	347	-1.49254	2.91e-09
21UR-9273	110	74	-1.49254	0.00440454
21UR-4819	421	282	-1.49254	7.38e-08
21UR-4008	162	108	-1.49254	0.000610689
21UR-4880	4519	3016	-1.49254	1.97e-68
21UR-7193	57	38	-1.49254	0.0323477
21UR-5954	84	56	-1.49254	0.0106321
21UR-10274	244	162	-1.51515	2.43e-05
21UR-6991	253	168	-1.51515	1.74e-05
21UR-7819	63	42	-1.51515	0.0228505
21UR-6085	278	183	-1.51515	5.45e-06
21UR-1831170	204	134	-1.51515	8.76e-05
21UR-1578	56	37	-1.51515	0.029681
21UR-3575	85	56	-1.51515	0.0087347
21UR-8542	143	94	-1.51515	0.000852493
21UR-7255	2285	1500	-1.51515	6.59e-38
21UR-538	1007	659	-1.53846	5.65e-18
21UR-1919	1378	899	-1.53846	3.48e-24
21UR-5706	706	460	-1.53846	2.81e-13
21UR-1216	64	42	-1.53846	0.0186303
21UR-5520	75	49	-1.53846	0.0114948
21UR-4755	86	56	-1.53846	0.00715014
21UR-2935	613	398	-1.53846	7.22e-12
21UR-4539	141	92	-1.53846	0.000717014
21UR-5714	1611	1045	-1.53846	1.58e-28
21UR-1273	77	50	-1.53846	0.0102602
21UR-6388	55	36	-1.53846	0.0271243
21UR-14116	99	64	-1.53846	0.00400576
21UR-11506	162	105	-1.53846	0.000267192
21UR-6475	59	38	-1.5625	0.021444
21UR-1778	83	53	-1.5625	0.00730637
21UR-3555	39	25	-1.5625	0.052264
21UR-13746	39	25	-1.5625	0.052264
21UR-7535	82	52	-1.5625	0.00665313
21UR-6501	84	53	-1.5625	0.00594124
21UR-7659	215	137	-1.5625	1.82e-05
21UR-8608	43	27	-1.5625	0.0408513
21UR-14571	161	102	-1.5625	0.000182182
21UR-3214	45	29	-1.5873	0.0361608
21UR-4684	3863	2445	-1.5873	7.8e-72
21UR-4668	111	70	-1.5873	0.00153015
21UR-32	145	92	-1.5873	0.000321355
21UR-4052	66	42	-1.5873	0.0122152
21UR-895	51	32	-1.5873	0.025185
21UR-2898	123	77	-1.5873	0.000789385
21UR-562	229	144	-1.5873	6.44e-06
21UR-6433	651	408	-1.5873	4.48e-14
21UR-6009	264	165	-1.5873	1.17e-06
21UR-11802	696	435	-1.5873	5.05e-15
21UR-4264	59	37	-1.6129	0.0156736
21UR-10275	65	40	-1.6129	0.0110354
21UR-4605	113	70	-1.6129	0.00100477
21UR-4571	91	56	-1.63934	0.00249454
21UR-3072	328	201	-1.63934	2.14e-08
21UR-9122	66	40	-1.63934	0.00883616
21UR-1790	103	63	-1.63934	0.00127225
21UR-3299	39	24	-1.63934	0.0374587
21UR-15512	121	74	-1.63934	0.0004683
21UR-798	41	25	-1.63934	0.0331012
21UR-4467	127	77	-1.63934	0.000336382
21UR-6858	51	31	-1.63934	0.0180497
21UR-9126	163	99	-1.63934	4.7e-05
21UR-1315	114	69	-1.66667	0.000585305
21UR-1051	187	112	-1.66667	9.23e-06
21UR-3244	60	36	-1.69492	0.00890274
21UR-5711	42	25	-1.69492	0.0260797
21UR-9857	32	19	-1.69492	0.0486647
21UR-3117	227	134	-1.69492	7.7e-07
21UR-13501	424	251	-1.69492	1.94e-11
21UR-5395	515	304	-1.69492	1.39e-13
21UR-2235	87	51	-1.69492	0.0015866
21UR-9647	75	44	-1.69492	0.00313388
21UR-6409	59	34	-1.72414	0.00789016
21UR-10970	59	34	-1.72414	0.00789016
21UR-5492	55	32	-1.72414	0.00997591
21UR-5008	507	295	-1.72414	5.42e-14
21UR-15616	37	21	-1.72414	0.029477
21UR-4807	35	20	-1.72414	0.0333762
21UR-1561	204	118	-1.72414	1.11e-06
21UR-6314	66	38	-1.72414	0.0043765
21UR-12631	31	18	-1.72414	0.0429309
21UR-12509	672	386	-1.75439	1.48e-18
21UR-5556	60	34	-1.75439	0.00618944
21UR-4972	808	462	-1.75439	3.13e-22
21UR-5755	52	30	-1.75439	0.00987731
21UR-11806	1038	593	-1.75439	3.68e-28
21UR-2584	234	133	-1.75439	1.09e-07
21UR-6169	168	95	-1.75439	5.29e-06
21UR-5329	2094	1185	-1.75439	2.18e-56
21UR-4970	206	117	-1.75439	4.83e-07
21UR-5357	904	511	-1.75439	1.79e-25
21UR-3890	40	23	-1.78571	0.0202117
21UR-3505	40	23	-1.78571	0.0202117
21UR-2688	38	21	-1.78571	0.022825
21UR-1719	146	82	-1.78571	1.72e-05
21UR-5901	36	20	-1.78571	0.0257966
21UR-12377	136	76	-1.78571	2.95e-05
21UR-1260	34	19	-1.78571	0.0291805
21UR-15338	64	36	-1.78571	0.00335185
21UR-3809	62	34	-1.78571	0.00375638
21UR-11965	542	301	-1.81818	9.66e-17
21UR-6723	58	32	-1.81818	0.00472139
21UR-3601	97	53	-1.81818	0.000296696
21UR-1848	453	250	-1.81818	1.66e-14
21UR-4349	106	58	-1.81818	0.000149355
21UR-9939	37	20	-1.81818	0.0197958
21UR-10526	35	19	-1.85185	0.0223393
21UR-4288	315	170	-1.85185	4.28e-11
21UR-4854	97	52	-1.85185	0.000198851
21UR-5236	31	17	-1.85185	0.02851
21UR-3085	78	42	-1.88679	0.000683509
21UR-1727	29	15	-1.88679	0.0322463
21UR-1498	76	40	-1.88679	0.000762076
21UR-1226	47	25	-1.88679	0.00721539
21UR-1685	56	30	-1.88679	0.00350235
21UR-6002	36	19	-1.88679	0.0169784
21UR-4258	421	221	-1.88679	3.48e-15
21UR-7194	163	86	-1.88679	7.88e-07
21UR-2623	25	13	-1.92308	0.0413642
21UR-3092	32	17	-1.92308	0.0215322
21UR-3594	106	55	-1.92308	4.3e-05
21UR-4638	264	136	-1.96078	1.31e-10
21UR-9843	116	59	-1.96078	1.66e-05
21UR-9525	72	37	-1.96078	0.000612921
21UR-5778	63	32	-1.96078	0.00123685
21UR-9783	56	29	-1.96078	0.00225724
21UR-2057	21	11	-1.96078	0.0532796
21UR-4671	47	24	-1.96078	0.00462688
21UR-9849	87	44	-1.96078	0.000143078
21UR-2295	78	39	-2	0.000285315
21UR-1668	26	13	-2	0.0308465
21UR-8109	26	13	-2	0.0308465
21UR-10207	43	21	-2	0.00575808
21UR-1837	43	21	-2	0.00575808
21UR-4510	67	33	-2	0.000633677
21UR-1014	24	12	-2	0.0347975
21UR-3110	24	12	-2	0.0347975
21UR-9505	36	18	-2	0.0107416
21UR-4171	627	310	-2.04082	8.42e-25
21UR-1374	106	52	-2.04082	1.75e-05
21UR-13819	53	26	-2.04082	0.00210089
21UR-10353	58	29	-2.04082	0.0012766
21UR-5139	80	39	-2.04082	0.000161924
21UR-3545	80	39	-2.04082	0.000161924
21UR-4696	51	25	-2.04082	0.00233296
21UR-6532	22	11	-2.04082	0.0392629
21UR-4163	22	11	-2.04082	0.0392629
21UR-14485	22	11	-2.04082	0.0392629
21UR-2584780	71	34	-2.04082	0.000322002
21UR-8328	37	18	-2.08333	0.00796967
21UR-923	37	18	-2.08333	0.00796967
21UR-8392	45	21	-2.08333	0.00318239
21UR-2159	30	14	-2.08333	0.0149765
21UR-4050	30	14	-2.08333	0.0149765
21UR-9611	30	14	-2.08333	0.0149765
21UR-1581	25	12	-2.08333	0.0255627
21UR-7761	20	10	-2.08333	0.0443028
21UR-4619	20	10	-2.08333	0.0443028
21UR-5185	20	10	-2.08333	0.0443028
21UR-102	20	10	-2.08333	0.0443028
21UR-11479	20	10	-2.08333	0.0443028
21UR-1851	20	10	-2.08333	0.0443028
21UR-11202	55	26	-2.08333	0.00116557
21UR-2574	55	26	-2.08333	0.00116557
21UR-14938	48	23	-2.12766	0.00212474
21UR-5596	147	69	-2.12766	1.1e-07
21UR-2586	33	15	-2.12766	0.00986241
21UR-3425	33	15	-2.12766	0.00986241
21UR-6537	59	27	-2.17391	0.000577911
21UR-1274	18	8	-2.17391	0.0499758
21UR-6374	18	8	-2.17391	0.0499758
21UR-6729	18	8	-2.17391	0.0499758
21UR-399	31	14	-2.17391	0.0109521
21UR-6178	31	14	-2.17391	0.0109521
21UR-1454	75	34	-2.17391	9.79e-05
21UR-6058	57	26	-2.17391	0.000634979
21UR-5768	39	18	-2.17391	0.00430337
21UR-10180	42	19	-2.22222	0.00285017
21UR-10832	21	10	-2.22222	0.0320529
21UR-2297	21	10	-2.22222	0.0320529
21UR-14714	21	10	-2.22222	0.0320529
21UR-112	64	29	-2.22222	0.000208359
21UR-12351	32	14	-2.22222	0.00795009
21UR-4250	158	70	-2.27273	6.73e-09
21UR-4387	27	12	-2.27273	0.013433
21UR-2769	19	8	-2.27273	0.0358029
21UR-3473	60	26	-2.27273	0.000247253
21UR-8497	22	10	-2.32558	0.0229558
21UR-2742448	194	83	-2.32558	3.66e-11
21UR-1153	42	18	-2.38095	0.00163276
21UR-10633	31	13	-2.38095	0.00626998
21UR-5904	17	7	-2.38095	0.0398728
21UR-10156	17	7	-2.38095	0.0398728
21UR-4279	17	7	-2.38095	0.0398728
21UR-2889	17	7	-2.38095	0.0398728
21UR-4362	17	7	-2.38095	0.0398728
21UR-1181	145	61	-2.38095	4.73e-09
21UR-2742	46	19	-2.43902	0.000772683
21UR-2467	150	62	-2.43902	1.67e-09
21UR-3699	29	12	-2.43902	0.00683344
21UR-8934	53	21	-2.5	0.000241905
21UR-5965	30	12	-2.5	0.00481976
21UR-2226	27	11	-2.5	0.00740999
21UR-2896	24	10	-2.5	0.0114494
21UR-7205	18	7	-2.5	0.0278992
21UR-6571	18	7	-2.5	0.0278992
21UR-8660	18	7	-2.5	0.0278992
21UR-6167	15	6	-2.5	0.0441936
21UR-3636	15	6	-2.5	0.0441936
21UR-5169	15	6	-2.5	0.0441936
21UR-7015	15	6	-2.5	0.0441936
21UR-4514	33	13	-2.5	0.00314787
21UR-1150	33	13	-2.5	0.00314787
21UR-11326	21	8	-2.5	0.0178013
21UR-2587	21	8	-2.5	0.0178013
21UR-9980	21	8	-2.5	0.0178013
21UR-4640	40	15	-2.5641	0.000954143
21UR-8188	66	25	-2.63158	1.78e-05
21UR-241	22	8	-2.63158	0.0123721
21UR-4637	19	7	-2.63158	0.0193139
21UR-13611	16	6	-2.7027	0.0304365
21UR-8302	16	6	-2.7027	0.0304365
21UR-3556	13	5	-2.7027	0.0485933
21UR-5454	13	5	-2.7027	0.0485933
21UR-2385	13	5	-2.7027	0.0485933
21UR-5682	13	5	-2.7027	0.0485933
21UR-2262	23	8	-2.77778	0.00852343
21UR-2220	23	8	-2.77778	0.00852343
21UR-13099	30	11	-2.77778	0.00247701
21UR-3707	20	7	-2.77778	0.013239
21UR-1143	47	17	-2.85714	0.00014773
21UR-773	17	6	-2.85714	0.0207265
21UR-3748	24	8	-2.85714	0.00582386
21UR-2076	14	5	-2.94118	0.0327951
21UR-5472	14	5	-2.94118	0.0327951
21UR-785	14	5	-2.94118	0.0327951
21UR-3672	14	5	-2.94118	0.0327951
21UR-3562	14	5	-2.94118	0.0327951
21UR-8405	14	5	-2.94118	0.0327951
21UR-2785	25	8	-3.0303	0.0039487
21UR-6815	18	6	-3.0303	0.013969
21UR-6091	33	11	-3.125	0.000780869
21UR-1797176	33	11	-3.125	0.000780869
21UR-9402	11	4	-3.125	0.0526827
21UR-8268	11	4	-3.125	0.0526827
21UR-6356	11	4	-3.125	0.0526827
21UR-842	11	4	-3.125	0.0526827
21UR-4262	15	5	-3.125	0.0218719
21UR-10474	19	6	-3.22581	0.00932559
21UR-6834	39	12	-3.33333	0.000157793
21UR-620	43	13	-3.33333	7.12e-05
21UR-13599	12	4	-3.33333	0.0346074
21UR-9692	12	4	-3.33333	0.0346074
21UR-5053	12	4	-3.33333	0.0346074
21UR-5067	12	4	-3.33333	0.0346074
21UR-10514	12	4	-3.33333	0.0346074
21UR-7498	29	8	-3.44828	0.000779286
21UR-6258	13	4	-3.7037	0.0224571
21UR-2809	22	6	-3.7037	0.0026394
21UR-1794	28	7	-4	0.000486229
21UR-6350	14	4	-4	0.0144152
21UR-3412	14	4	-4	0.0144152
21UR-7392	29	7	-4	0.000312704
21UR-7510	10	2	-4.16667	0.0351427
21UR-6543	10	2	-4.16667	0.0351427
21UR-3756	10	2	-4.16667	0.0351427
21UR-2876	10	2	-4.16667	0.0351427
21UR-3954	10	2	-4.16667	0.0351427
21UR-7072	10	2	-4.16667	0.0351427
21UR-2861	11	2	-4.54545	0.0219579
21UR-14536	11	2	-4.54545	0.0219579
21UR-4576	11	2	-4.54545	0.0219579
21UR-9089	17	4	-4.7619	0.00361084
21UR-13202	5	0	-5	0.0449752
21UR-11398	5	0	-5	0.0449752
21UR-12558	5	0	-5	0.0449752
21UR-7249	5	0	-5	0.0449752
21UR-2446	5	0	-5	0.0449752
21UR-11241	5	0	-5	0.0449752
21UR-2594	5	0	-5	0.0449752
21UR-10851	5	0	-5	0.0449752
21UR-11349	5	0	-5	0.0449752
21UR-5216	5	0	-5	0.0449752
21UR-10582	5	0	-5	0.0449752
21UR-13396	5	0	-5	0.0449752
21UR-5624	5	0	-5	0.0449752
21UR-107	5	0	-5	0.0449752
21UR-3794	5	0	-5	0.0449752
21UR-3754	5	0	-5	0.0449752
21UR-652	5	0	-5	0.0449752
21UR-13962	5	0	-5	0.0449752
21UR-5677	5	0	-5	0.0449752
21UR-7546	12	2	-5	0.0135785
21UR-2698316	19	4	-5.26316	0.00138268
21UR-5231	20	4	-5.55556	0.000847791
21UR-4375	27	5	-5.55556	9.08e-05
21UR-4276	6	0	-5.88235	0.0241862
21UR-7812	6	0	-5.88235	0.0241862
21UR-2995	6	0	-5.88235	0.0241862
21UR-1325	6	0	-5.88235	0.0241862
21UR-13269	6	0	-5.88235	0.0241862
21UR-7790	6	0	-5.88235	0.0241862
21UR-9128	6	0	-5.88235	0.0241862
21UR-7244	6	0	-5.88235	0.0241862
21UR-6873	6	0	-5.88235	0.0241862
21UR-3821	6	0	-5.88235	0.0241862
21UR-13345	6	0	-5.88235	0.0241862
21UR-9441	6	0	-5.88235	0.0241862
21UR-7785	15	2	-6.25	0.00305424
21UR-5906	8	1	-6.66667	0.0328592
21UR-3086	8	1	-6.66667	0.0328592
21UR-7753	8	1	-6.66667	0.0328592
21UR-5738	8	1	-6.66667	0.0328592
21UR-13971	8	1	-6.66667	0.0328592
21UR-7677	8	1	-6.66667	0.0328592
21UR-15427	8	1	-6.66667	0.0328592
21UR-11332	8	1	-6.66667	0.0328592
21UR-8044	7	0	-7.14286	0.0130065
21UR-5113	7	0	-7.14286	0.0130065
21UR-7464	7	0	-7.14286	0.0130065
21UR-2205	34	5	-7.14286	2.67e-06
21UR-2099	9	1	-7.69231	0.0194092
21UR-2851	9	1	-7.69231	0.0194092
21UR-3289	9	1	-7.69231	0.0194092
21UR-8427	8	0	-7.69231	0.0069945
21UR-10317	8	0	-7.69231	0.0069945
21UR-8436	10	1	-8.33333	0.0113727
21UR-4535	9	0	-9.09091	0.00376142
21UR-12095	9	0	-9.09091	0.00376142
21UR-7610	11	1	-9.09091	0.00661865

## Sheet: adr-1 adr-2
piRNA	Normalized # of WT reads	Normalized # of adr-1;adr-2 reads	Fold change (adr-1;adr-2 vs wt)	pVal
21UR-1723	1	9	9.18	0.0108
21UR-4225	1	9	9.18	0.0108
21UR-3701	1	9	9.18	0.0108
21UR-1127	0	8	8.16	0.00394
21UR-9959	0	7	7.14	0.00787
21UR-6338	0	7	7.14	0.00787
21UR-8327	1	7	7.14	0.0354
21UR-8606	1	7	7.14	0.0354
21UR-6563	1	7	7.14	0.0354
21UR-4969	1	7	7.14	0.0354
21UR-2246	1	7	7.14	0.0354
21UR-4453	1	7	7.14	0.0354
21UR-250	0	6	6.12	0.0157
21UR-976	0	6	6.12	0.0157
21UR-7405	0	6	6.12	0.0157
21UR-1634	0	6	6.12	0.0157
21UR-5852	0	5	5.1	0.0314
21UR-9740	0	5	5.1	0.0314
21UR-4531	0	5	5.1	0.0314
21UR-8314	0	5	5.1	0.0314
21UR-3860	0	5	5.1	0.0314
21UR-2381	0	5	5.1	0.0314
21UR-477	0	5	5.1	0.0314
21UR-8451	2	9	4.59	0.033
21UR-12623	2	9	4.59	0.033
21UR-4795	3	13	4.42	0.0108
21UR-6197	3	13	4.42	0.0108
21UR-5361	4	15	3.82	0.00973
21UR-3706	5	17	3.47	0.00857
21UR-1134	3	10	3.4	0.0465
21UR-4337	3	10	3.4	0.0465
21UR-2513	3	10	3.4	0.0465
21UR-9034	4	13	3.31	0.0248
21UR-10962	4	12	3.06	0.0388
21UR-4062	5	15	3.06	0.0209
21UR-272	5	14	2.85	0.0321
21UR-3181	6	15	2.55	0.0396
21UR-470	17	42	2.46	0.00115
21UR-442	10	24	2.45	0.0124
21UR-7056	13	32	2.43	0.00488
21UR-4130	13	31	2.35	0.007
21UR-8243	8	17	2.17	0.0545
21UR-6615	10	21	2.14	0.0359
21UR-6059	11	23	2.13	0.0292
21UR-5324	22	45	2.04	0.00473
21UR-2718	10	20	2.04	0.05
21UR-2560195	17	33	1.92	0.0226
21UR-4190	23	43	1.86	0.0127
21UR-13680	25	41	1.63	0.0416
21UR-280	28	45	1.6	0.039
21UR-4052	66	103	1.56	0.00434
21UR-1051	187	155	-1.20482	0.0308
21UR-2845	283	232	-1.21951	0.00784
21UR-1973912	209	171	-1.21951	0.0186
21UR-1	328	268	-1.21951	0.00388
21UR-602	1297	1043	-1.25	5.06e-09
21UR-11883	359	287	-1.25	0.00121
21UR-15512	121	97	-1.25	0.0428
21UR-2014236	193	154	-1.25	0.0128
21UR-1779	489	386	-1.26582	9.29e-05
21UR-12261	160	126	-1.26582	0.018
21UR-1561	204	161	-1.26582	0.00844
21UR-5025	363	286	-1.26582	0.000631
21UR-7194	163	128	-1.26582	0.0162
21UR-5008	507	397	-1.28205	3.94e-05
21UR-471	140	109	-1.28205	0.0199
21UR-3246	448	349	-1.28205	8.08e-05
21UR-11965	542	421	-1.28205	1.44e-05
21UR-380	158	122	-1.2987	0.0125
21UR-4338	133	103	-1.2987	0.0204
21UR-5714	1611	1244	-1.2987	6.74e-14
21UR-4883	180	139	-1.2987	0.0073
21UR-2052	188	145	-1.2987	0.00619
21UR-3142	98	75	-1.2987	0.0383
21UR-5464	271	208	-1.2987	0.00112
21UR-8403	125	96	-1.2987	0.0204
21UR-7129	536	408	-1.31579	4.2e-06
21UR-1842	94	71	-1.31579	0.035
21UR-5045	256	194	-1.31579	0.000946
21UR-12451	81	61	-1.31579	0.0446
21UR-4292	800	602	-1.33333	7.65e-09
21UR-3242	372	279	-1.33333	5.86e-05
21UR-15012	234	175	-1.33333	0.00112
21UR-3117	227	169	-1.33333	0.00113
21UR-5515	70	52	-1.35135	0.0494
21UR-1486	1196	885	-1.35135	1.88e-13
21UR-7737	196	145	-1.35135	0.00181
21UR-8725	170	125	-1.35135	0.00335
21UR-3103	148	109	-1.35135	0.00575
21UR-8240	90	66	-1.35135	0.0259
21UR-1353	104	76	-1.35135	0.0174
21UR-4755	86	63	-1.36986	0.0283
21UR-12910	86	63	-1.36986	0.0283
21UR-5230	606	445	-1.36986	6.35e-08
21UR-1216	64	47	-1.36986	0.051
21UR-6408	120	88	-1.36986	0.0102
21UR-5565	398	291	-1.36986	7.65e-06
21UR-3372	175	127	-1.36986	0.00216
21UR-1740	119	87	-1.36986	0.00988
21UR-3871	77	56	-1.36986	0.0326
21UR-10047	63	46	-1.36986	0.0495
21UR-15571	73	53	-1.36986	0.0356
21UR-1687	148	107	-1.38889	0.00386
21UR-3926	680	489	-1.38889	1.87e-09
21UR-12908	85	61	-1.38889	0.0222
21UR-5107	155	111	-1.38889	0.0026
21UR-4258	421	302	-1.38889	1.49e-06
21UR-4899	1275	912	-1.38889	1.11e-16
21UR-5395	515	367	-1.40845	7.5e-08
21UR-2275	3032	2159	-1.40845	5.1e-38
21UR-6424	126	90	-1.40845	0.00537
21UR-7654	139	99	-1.40845	0.00355
21UR-6750	76	54	-1.40845	0.0254
21UR-9122	66	47	-1.40845	0.0351
21UR-1311	244	173	-1.40845	0.000148
21UR-225	230	163	-1.40845	0.000212
21UR-4978	341	242	-1.40845	7.72e-06
21UR-6537	59	42	-1.40845	0.0433
21UR-4264	59	42	-1.40845	0.0433
21UR-11976	180	127	-1.40845	0.000907
21UR-4250	158	111	-1.42857	0.00152
21UR-14131	58	41	-1.42857	0.0417
21UR-57	61	43	-1.42857	0.0369
21UR-2000	258	180	-1.42857	5.45e-05
21UR-3029	207	145	-1.42857	0.000274
21UR-6953	835	583	-1.42857	9.13e-13
21UR-10414	386	269	-1.42857	8.42e-07
21UR-3693	261	181	-1.42857	3.94e-05
21UR-3224	569	396	-1.42857	2.17e-09
21UR-4854	97	67	-1.44928	0.0089
21UR-2689	75	52	-1.44928	0.0194
21UR-212	228	158	-1.44928	0.000103
21UR-10325	128	89	-1.44928	0.00297
21UR-4008	162	112	-1.44928	0.000907
21UR-4181	84	58	-1.44928	0.0136
21UR-8425	758	524	-1.44928	3.12e-12
21UR-1267	4737	3272	-1.44928	3.1e-67
21UR-4922	62	43	-1.44928	0.0302
21UR-5041	65	45	-1.44928	0.0267
21UR-3072	328	226	-1.44928	3.14e-06
21UR-2584780	71	49	-1.44928	0.021
21UR-2742	46	32	-1.44928	0.0539
21UR-1876	328	225	-1.44928	2.51e-06
21UR-1703	98	67	-1.44928	0.00732
21UR-11806	1038	713	-1.44928	1.39e-16
21UR-4502	600	412	-1.44928	2.67e-10
21UR-11901	58	40	-1.44928	0.0327
21UR-15338	64	44	-1.47059	0.0256
21UR-112	64	44	-1.47059	0.0256
21UR-13192	97	66	-1.47059	0.00702
21UR-3387	256	174	-1.47059	2.06e-05
21UR-705	99	67	-1.47059	0.006
21UR-1294	72	49	-1.47059	0.0171
21UR-6089	90	61	-1.47059	0.00847
21UR-10274	244	165	-1.47059	2.5e-05
21UR-7255	2285	1547	-1.47059	1.96e-36
21UR-531	190	128	-1.47059	0.000175
21UR-3651	564	381	-1.47059	2.39e-10
21UR-4638	264	178	-1.47059	1.13e-05
21UR-518	182	122	-1.49254	0.000199
21UR-4571	91	61	-1.49254	0.00691
21UR-4148	284	191	-1.49254	4.05e-06
21UR-3702	117	79	-1.49254	0.00237
21UR-2563	280	188	-1.49254	4.31e-06
21UR-3430	140	94	-1.49254	0.000928
21UR-4943	814	544	-1.49254	8.77e-15
21UR-15577	215	144	-1.49254	4.75e-05
21UR-5101	232	155	-1.49254	2.38e-05
21UR-6094	78	52	-1.49254	0.0105
21UR-3511	78	52	-1.49254	0.0105
21UR-5755	52	35	-1.49254	0.0323
21UR-507	384	256	-1.49254	6.28e-08
21UR-5596	147	98	-1.49254	0.000607
21UR-13691	109	72	-1.51515	0.00271
21UR-7829	83	55	-1.51515	0.00792
21UR-8144	68	45	-1.51515	0.0142
21UR-1845094	1035	682	-1.51515	2.28e-19
21UR-7579	311	205	-1.51515	5.86e-07
21UR-569	336	221	-1.51515	2.06e-07
21UR-1021	79	52	-1.51515	0.00847
21UR-6845	93	61	-1.51515	0.00454
21UR-2589	262	172	-1.51515	3.89e-06
21UR-79	76	50	-1.51515	0.00951
21UR-4882	121	80	-1.51515	0.00134
21UR-8795	101	66	-1.51515	0.00307
21UR-10617	168	110	-1.51515	0.00017
21UR-2147	769	504	-1.53846	3.62e-15
21UR-14299	78	51	-1.53846	0.00805
21UR-1332	172	112	-1.53846	0.000124
21UR-14347	2269	1479	-1.53846	6.08e-42
21UR-13341	460	300	-1.53846	6.65e-10
21UR-1143	47	31	-1.53846	0.033
21UR-4171	627	408	-1.53846	5.53e-13
21UR-1218	116	75	-1.53846	0.00135
21UR-2477	361	234	-1.53846	3.41e-08
21UR-628	903	586	-1.53846	4.59e-18
21UR-2266	817	530	-1.53846	1.55e-16
21UR-12690	121	79	-1.53846	0.00103
21UR-6314	66	43	-1.53846	0.0128
21UR-2717643	705	457	-1.53846	1.39e-14
21UR-864	183	118	-1.53846	5.88e-05
21UR-5597	680	439	-1.53846	2.98e-14
21UR-10192	202	130	-1.53846	2.51e-05
21UR-15352	180	116	-1.53846	6.54e-05
21UR-3801	166	107	-1.5625	0.000118
21UR-15664	449	290	-1.5625	4.89e-10
21UR-9610	68	44	-1.5625	0.0108
21UR-1632	2907	1871	-1.5625	7.87e-56
21UR-12509	672	432	-1.5625	2.54e-14
21UR-1612	162	104	-1.5625	0.000124
21UR-9195	205	132	-1.5625	1.73e-05
21UR-1078	159	102	-1.5625	0.000138
21UR-3733	255	163	-1.5625	1.61e-06
21UR-467	361	230	-1.5625	1.19e-08
21UR-13367	540	345	-1.5625	3.79e-12
21UR-2400	160	102	-1.5625	0.000111
21UR-3890	40	25	-1.5625	0.04
21UR-11506	162	103	-1.5625	9.45e-05
21UR-554	696	441	-1.5873	1.77e-15
21UR-228	394	249	-1.5873	1.31e-09
21UR-4459	1344	848	-1.5873	1e-28
21UR-3180	398	251	-1.5873	9.52e-10
21UR-3978	693	436	-1.5873	8.65e-16
21UR-2486	457	287	-1.5873	5.21e-11
21UR-2745191	446	280	-1.5873	8.26e-11
21UR-7463	112	70	-1.5873	0.000817
21UR-2584	234	147	-1.5873	1.92e-06
21UR-4426	104	65	-1.5873	0.0012
21UR-1193	65	41	-1.5873	0.00908
21UR-11813	717	450	-1.5873	1.71e-16
21UR-4658	555	348	-1.5873	3.41e-13
21UR-163	57	36	-1.5873	0.0136
21UR-1339	80	50	-1.6129	0.00385
21UR-3380	129	81	-1.6129	0.000304
21UR-1925791	126	79	-1.6129	0.000337
21UR-2891	532	331	-1.6129	6.07e-13
21UR-4340	367	228	-1.6129	1.86e-09
21UR-798	41	25	-1.6129	0.0314
21UR-2875	174	108	-1.6129	2.66e-05
21UR-11915	87	54	-1.6129	0.00245
21UR-4286	227	141	-1.6129	1.66e-06
21UR-2826	292	180	-1.6129	5.36e-08
21UR-4402	307	190	-1.6129	2.44e-08
21UR-7604	104	64	-1.6129	0.000894
21UR-3078	454	280	-1.6129	1.41e-11
21UR-2712	71	44	-1.6129	0.00537
21UR-11601	180	111	-1.6129	1.62e-05
21UR-5706	706	435	-1.6129	3.76e-17
21UR-620	43	27	-1.6129	0.0261
21UR-2037	601	370	-1.6129	6.45e-15
21UR-3594	106	65	-1.6129	0.000754
21UR-1166	53	33	-1.6129	0.0143
21UR-4737	295	181	-1.6129	3.63e-08
21UR-3470	680	418	-1.63934	9.63e-17
21UR-3969	181	111	-1.63934	1.29e-05
21UR-85	98	60	-1.63934	0.00111
21UR-2314	211	129	-1.63934	2.59e-06
21UR-4287	108	66	-1.63934	0.000635
21UR-908	4201	2571	-1.63934	3.53e-95
21UR-2721	3879	2373	-1.63934	3.93e-88
21UR-13361	30	18	-1.63934	0.0548
21UR-2752	50	31	-1.63934	0.0161
21UR-6254	45	28	-1.63934	0.0217
21UR-2710	541	330	-1.63934	6.05e-14
21UR-14116	99	60	-1.63934	0.00087
21UR-11087	1561	948	-1.63934	1.61e-37
21UR-12377	136	83	-1.63934	0.000108
21UR-3761	800	485	-1.63934	3.38e-20
21UR-6009	264	160	-1.63934	9.14e-08
21UR-7142	301	182	-1.63934	1.23e-08
21UR-7070	180	109	-1.63934	8.91e-06
21UR-7562	69	42	-1.63934	0.0047
21UR-5503	1859	1125	-1.66667	6.75e-45
21UR-1050	66	40	-1.66667	0.00523
21UR-3106	603	363	-1.66667	5.18e-16
21UR-5648	810	487	-1.66667	6.11e-21
21UR-8465	78	47	-1.66667	0.00248
21UR-4861	1055	633	-1.66667	6.14e-27
21UR-849	518	310	-1.66667	3.11e-14
21UR-6433	651	389	-1.66667	1.85e-17
21UR-1793	5292	3166	-1.66667	1.36e-128
21UR-1137	328	196	-1.66667	1.12e-09
21UR-8310	250	149	-1.66667	8.61e-08
21UR-9553	250	149	-1.66667	8.61e-08
21UR-4835	379	225	-1.69492	4.78e-11
21UR-12631	31	18	-1.69492	0.042
21UR-1190	174	103	-1.69492	5.81e-06
21UR-4890	50	30	-1.69492	0.0116
21UR-13337	169	100	-1.69492	7.59e-06
21UR-13388	119	70	-1.69492	0.000154
21UR-5745	102	60	-1.69492	0.000416
21UR-1778	83	49	-1.69492	0.00136
21UR-5182	109	64	-1.69492	0.000266
21UR-13730	9757	5745	-1.69492	3.26e-247
21UR-3601	97	57	-1.69492	0.000548
21UR-6991	253	149	-1.69492	4.16e-08
21UR-5077	189	111	-1.69492	1.9e-06
21UR-1705	189	111	-1.69492	1.9e-06
21UR-7174	85	50	-1.69492	0.00114
21UR-4433	212	124	-1.69492	4.35e-07
21UR-3235	405	238	-1.69492	3.99e-12
21UR-4539	141	83	-1.69492	3.18e-05
21UR-5350	61	36	-1.72414	0.00501
21UR-1790	103	60	-1.72414	0.000323
21UR-12629	220	128	-1.72414	2.21e-07
21UR-5142	404	236	-1.72414	2.68e-12
21UR-6814	140	82	-1.72414	2.94e-05
21UR-5381	56	33	-1.72414	0.00667
21UR-258	35	20	-1.72414	0.0285
21UR-5312	28	16	-1.72414	0.0473
21UR-15217	940	546	-1.72414	1.5e-26
21UR-208	100	58	-1.72414	0.000356
21UR-6007	86	50	-1.72414	0.000879
21UR-10353	58	34	-1.72414	0.00555
21UR-9206	211	122	-1.72414	2.91e-07
21UR-3213	148	86	-1.72414	1.47e-05
21UR-8328	37	21	-1.72414	0.0235
21UR-13403	911	527	-1.72414	3.92e-26
21UR-8141	201	116	-1.72414	4.91e-07
21UR-6262	60	35	-1.72414	0.00462
21UR-4509	175	101	-1.72414	2.36e-06
21UR-32	145	84	-1.72414	1.61e-05
21UR-8472	62	36	-1.72414	0.00385
21UR-4238	264	152	-1.72414	7.23e-09
21UR-9273	110	63	-1.75439	0.000148
21UR-4369	103	59	-1.75439	0.000231
21UR-5109	1313	753	-1.75439	1e-37
21UR-2935	613	352	-1.75439	1.42e-18
21UR-1016	112	64	-1.75439	0.000124
21UR-6085	278	159	-1.75439	2.19e-09
21UR-5387	50	29	-1.75439	0.0082
21UR-1581	25	14	-1.75439	0.0533
21UR-5833	25	14	-1.75439	0.0533
21UR-10819	3000	1712	-1.75439	4.91e-85
21UR-562	229	130	-1.75439	4.44e-08
21UR-1260	34	19	-1.75439	0.0262
21UR-2205	34	19	-1.75439	0.0262
21UR-10640	222	126	-1.75439	6.84e-08
21UR-4668	111	63	-1.75439	0.000114
21UR-14356	495	281	-1.75439	1.05e-15
21UR-1069	357	203	-1.75439	8.52e-12
21UR-5728	97	55	-1.75439	0.000278
21UR-3214	45	25	-1.75439	0.011
21UR-5901	36	20	-1.75439	0.0216
21UR-5329	2094	1186	-1.75439	2.84e-61
21UR-2309	47	27	-1.78571	0.00907
21UR-4684	3863	2173	-1.78571	1.93e-113
21UR-1124	89	50	-1.78571	0.000399
21UR-4347	60	34	-1.78571	0.00324
21UR-4976	273	153	-1.78571	1.01e-09
21UR-15114	541	303	-1.78571	1.06e-17
21UR-15688	532	298	-1.78571	1.92e-17
21UR-4605	113	63	-1.78571	6.69e-05
21UR-6178	31	17	-1.78571	0.0292
21UR-5236	31	17	-1.78571	0.0292
21UR-1615	84	47	-1.78571	0.000522
21UR-13875	42	23	-1.78571	0.0121
21UR-6785	417	232	-1.78571	3.6e-14
21UR-14967	366	204	-1.78571	1.18e-12
21UR-4864	2093	1165	-1.78571	3.78e-64
21UR-2558	33	18	-1.78571	0.024
21UR-12820	721	401	-1.78571	1.95e-23
21UR-8148	112	62	-1.78571	6.11e-05
21UR-3336	186	103	-1.81818	2.69e-07
21UR-3575	85	47	-1.81818	0.000397
21UR-15616	37	20	-1.81818	0.0162
21UR-923	37	20	-1.81818	0.0162
21UR-14571	161	89	-1.81818	1.39e-06
21UR-2660	100	55	-1.81818	0.000124
21UR-14355	5887	3238	-1.81818	1.34e-182
21UR-4819	421	231	-1.81818	8.79e-15
21UR-13746	39	21	-1.81818	0.0134
21UR-5768	39	21	-1.81818	0.0134
21UR-9881	145	80	-1.81818	3.95e-06
21UR-304	324	177	-1.81818	7.28e-12
21UR-7535	82	45	-1.81818	0.000433
21UR-2290	41	22	-1.81818	0.011
21UR-5954	84	46	-1.81818	0.000361
21UR-1578	56	31	-1.81818	0.00323
21UR-9783	56	31	-1.81818	0.00323
21UR-975	163	89	-1.85185	8.08e-07
21UR-14467	640	348	-1.85185	3.15e-22
21UR-4671	47	25	-1.85185	0.00622
21UR-1181	145	79	-1.85185	2.72e-06
21UR-1678	83	45	-1.85185	0.000327
21UR-3036	83	45	-1.85185	0.000327
21UR-1588	34	18	-1.85185	0.0179
21UR-1919	1378	742	-1.85185	9.61e-47
21UR-3085	78	42	-1.85185	0.000425
21UR-8365	99	53	-1.85185	7.68e-05
21UR-4748	1359	727	-1.88679	6.25e-47
21UR-2057	21	11	-1.88679	0.0544
21UR-7623	67	36	-1.88679	0.000959
21UR-4253	224	119	-1.88679	3.17e-09
21UR-10057	182	97	-1.88679	8.6e-08
21UR-3026	23	12	-1.88679	0.0441
21UR-1848	453	240	-1.88679	2.82e-17
21UR-1315	114	60	-1.88679	1.64e-05
21UR-3642	487	257	-1.88679	1.49e-18
21UR-2235	87	46	-1.88679	0.000154
21UR-7498	29	15	-1.88679	0.024
21UR-3809	62	33	-1.88679	0.00125
21UR-3370	192	101	-1.88679	2.42e-08
21UR-6987	33	17	-1.88679	0.0161
21UR-3425	33	17	-1.88679	0.0161
21UR-11885	5803	3044	-1.92308	2.07e-203
21UR-5802	35	18	-1.92308	0.0132
21UR-1200	282	148	-1.92308	1.36e-11
21UR-9939	37	19	-1.92308	0.0109
21UR-4537	1813	948	-1.92308	1.76e-65
21UR-3299	39	20	-1.92308	0.00896
21UR-2898	123	64	-1.92308	6.01e-06
21UR-4467	127	66	-1.92308	4.21e-06
21UR-895	51	27	-1.92308	0.00285
21UR-383	51	27	-1.92308	0.00285
21UR-2761	2496	1297	-1.92308	8.28e-91
21UR-3775	208	108	-1.92308	3.98e-09
21UR-5492	55	29	-1.92308	0.00195
21UR-552	413	214	-1.92308	1.27e-16
21UR-11000	3461	1791	-1.92308	2.86e-126
21UR-12002	67	35	-1.92308	0.00064
21UR-4510	67	35	-1.92308	0.00064
21UR-2467	150	77	-1.92308	4.44e-07
21UR-400	83	43	-1.92308	0.000148
21UR-11415	465	240	-1.92308	9.39e-19
21UR-2983	157	81	-1.96078	1.95e-07
21UR-877	225	115	-1.96078	4.88e-10
21UR-6818	263	135	-1.96078	1.76e-11
21UR-6581	411	210	-1.96078	4.5e-17
21UR-4723	118	60	-1.96078	5.1e-06
21UR-1871	84	43	-1.96078	0.000109
21UR-8188	66	34	-1.96078	0.00057
21UR-1153	42	21	-1.96078	0.00543
21UR-2743	30	15	-1.96078	0.0175
21UR-9611	30	15	-1.96078	0.0175
21UR-11479	20	10	-1.96078	0.0487
21UR-1983	20	10	-1.96078	0.0487
21UR-4985	376	191	-1.96078	5.06e-16
21UR-3721	149	75	-1.96078	2.62e-07
21UR-5170	222	112	-1.96078	3.42e-10
21UR-3101	79	40	-2	0.00014
21UR-1719	146	73	-2	2.76e-07
21UR-5213	73	37	-2	0.000242
21UR-4475	61	31	-2	0.000731
21UR-6409	59	30	-2	0.00088
21UR-6475	59	30	-2	0.00088
21UR-13309	9510	4754	-2	0
21UR-2816	310	155	-2	6.79e-14
21UR-3875	51	25	-2	0.00186
21UR-121	43	21	-2	0.00397
21UR-8608	43	21	-2	0.00397
21UR-6169	168	84	-2	2.58e-08
21UR-1073	35	17	-2	0.00858
21UR-7987	64	32	-2.04082	0.000445
21UR-7208	155	76	-2.04082	6.54e-08
21UR-12462	449	221	-2.04082	5.81e-20
21UR-2728	476	234	-2.04082	4.55e-21
21UR-6723	58	29	-2.04082	0.000775
21UR-3074	29	14	-2.04082	0.0155
21UR-1727	29	14	-2.04082	0.0155
21UR-10080	112	55	-2.04082	3.7e-06
21UR-2576	54	27	-2.04082	0.00112
21UR-4375	27	13	-2.04082	0.0189
21UR-388	259	126	-2.04082	1.95e-12
21UR-9126	163	80	-2.04082	2.08e-08
21UR-1342	46	22	-2.04082	0.00238
21UR-538	1007	490	-2.04082	1.27e-43
21UR-537	126	61	-2.04082	6.83e-07
21UR-8984	105	51	-2.04082	5.54e-06
21UR-2179	63	31	-2.04082	0.000389
21UR-10072	42	20	-2.04082	0.00348
21UR-6053	21	10	-2.04082	0.0349
21UR-1772	21	10	-2.04082	0.0349
21UR-14591	40	19	-2.08333	0.00421
21UR-2594170	137	66	-2.08333	2.06e-07
21UR-4880	4519	2186	-2.08333	1.57e-191
21UR-6419	19	9	-2.08333	0.043
21UR-4606	95	46	-2.08333	1.36e-05
21UR-2289	146	70	-2.08333	7.44e-08
21UR-1713	106	51	-2.08333	4.04e-06
21UR-82	17	8	-2.08333	0.0533
21UR-2245	17	8	-2.08333	0.0533
21UR-1466	17	8	-2.08333	0.0533
21UR-4362	17	8	-2.08333	0.0533
21UR-4589	198	95	-2.08333	3.17e-10
21UR-13501	424	203	-2.08333	4.41e-20
21UR-9857	32	15	-2.08333	0.00912
21UR-1219	94	45	-2.08333	1.18e-05
21UR-11225	612	291	-2.12766	1.18e-28
21UR-3439	58	28	-2.12766	0.00049
21UR-5614	58	28	-2.12766	0.00049
21UR-3963	144	68	-2.12766	5.62e-08
21UR-7032	28	13	-2.12766	0.0135
21UR-4972	808	382	-2.12766	1.68e-37
21UR-841	41	19	-2.12766	0.00303
21UR-1868	177	84	-2.12766	1.57e-09
21UR-1623	162	76	-2.12766	7.31e-09
21UR-2049	54	25	-2.12766	0.000708
21UR-3555	39	18	-2.12766	0.00366
21UR-1668	26	12	-2.12766	0.0165
21UR-10275	65	31	-2.12766	0.000204
21UR-5778	63	30	-2.12766	0.000245
21UR-711	63	30	-2.12766	0.000245
21UR-4288	315	148	-2.12766	6.46e-16
21UR-4032	172	81	-2.12766	1.92e-09
21UR-5311	368	172	-2.12766	2.15e-18
21UR-5357	904	423	-2.12766	1.19e-42
21UR-14938	48	22	-2.12766	0.00123
21UR-9248	24	11	-2.12766	0.0202
21UR-2896	24	11	-2.12766	0.0202
21UR-14	199	93	-2.12766	9.12e-11
21UR-3461	57	27	-2.12766	0.000423
21UR-12528	68	32	-2.17391	0.000122
21UR-294	594	275	-2.17391	3.37e-29
21UR-1273	77	36	-2.17391	4.27e-05
21UR-10319	55	25	-2.17391	0.000508
21UR-5560	33	15	-2.17391	0.0065
21UR-11335	33	15	-2.17391	0.0065
21UR-10976	22	10	-2.17391	0.0247
21UR-5630	227	105	-2.17391	3.16e-12
21UR-5323	190	88	-2.17391	1.56e-10
21UR-1531	31	14	-2.17391	0.00788
21UR-5139	80	37	-2.17391	2.56e-05
21UR-5556	60	28	-2.17391	0.000252
21UR-15325	40	18	-2.17391	0.00261
21UR-528	20	9	-2.17391	0.0303
21UR-2742448	194	89	-2.17391	6.84e-11
21UR-9843	116	53	-2.17391	4.06e-07
21UR-6974	29	13	-2.17391	0.00957
21UR-10937	190	87	-2.17391	9.65e-11
21UR-7666	38	17	-2.17391	0.00315
21UR-1685	56	25	-2.17391	0.000363
21UR-6132	27	12	-2.22222	0.0116
21UR-2226	27	12	-2.22222	0.0116
21UR-15077	99	45	-2.22222	2.29e-06
21UR-1621	36	16	-2.22222	0.0038
21UR-3513	18	8	-2.22222	0.0373
21UR-1415	18	8	-2.22222	0.0373
21UR-9605	61	28	-2.22222	0.00018
21UR-7659	215	97	-2.22222	3.34e-12
21UR-1831170	204	92	-2.22222	1.09e-11
21UR-2623	25	11	-2.22222	0.0142
21UR-10268	1857	831	-2.22222	2.18e-93
21UR-618	16	7	-2.22222	0.046
21UR-2574	55	24	-2.27273	0.000308
21UR-1922028	94	42	-2.27273	2.76e-06
21UR-5919	23	10	-2.27273	0.0173
21UR-5390	23	10	-2.27273	0.0173
21UR-9525	72	32	-2.27273	3.14e-05
21UR-3215	911	400	-2.27273	1.62e-48
21UR-11392	28	12	-2.27273	0.00813
21UR-10068	21	9	-2.27273	0.0211
21UR-3910	21	9	-2.27273	0.0211
21UR-11802	696	304	-2.27273	7.79e-38
21UR-13183	413	179	-2.32558	2.34e-23
21UR-1838	80	35	-2.32558	9.29e-06
21UR-15452	40	17	-2.32558	0.00156
21UR-10560	33	14	-2.32558	0.00388
21UR-4514	33	14	-2.32558	0.00388
21UR-11391	33	14	-2.32558	0.00388
21UR-3099	33	14	-2.32558	0.00388
21UR-5541	59	25	-2.32558	0.000128
21UR-10491	26	11	-2.32558	0.00986
21UR-691	26	11	-2.32558	0.00986
21UR-11732	38	16	-2.32558	0.00187
21UR-7772	31	13	-2.32558	0.00468
21UR-3184	296	126	-2.32558	1.05e-17
21UR-9811	394	168	-2.32558	5.07e-23
21UR-1837	43	18	-2.32558	0.000907
21UR-4757	29	12	-2.38095	0.00564
21UR-9647	75	32	-2.38095	1.09e-05
21UR-4970	206	87	-2.38095	4.1e-13
21UR-7391	17	7	-2.38095	0.0316
21UR-279	1040	436	-2.38095	1.43e-59
21UR-2814	56	23	-2.38095	0.000127
21UR-2843	397	166	-2.38095	6.06e-24
21UR-1618	739	309	-2.38095	3.86e-43
21UR-2553878	22	9	-2.38095	0.0145
21UR-14421	49	20	-2.38095	0.000307
21UR-3740	148	61	-2.43902	4.13e-10
21UR-5803	47	19	-2.43902	0.000366
21UR-6388	55	22	-2.43902	0.000104
21UR-4640	40	16	-2.43902	0.000895
21UR-13005	30	12	-2.43902	0.00387
21UR-13099	30	12	-2.43902	0.00387
21UR-102	20	8	-2.43902	0.0176
21UR-1504	15	6	-2.43902	0.0387
21UR-6176	15	6	-2.43902	0.0387
21UR-6997	15	6	-2.43902	0.0387
21UR-3191	50	20	-2.43902	0.000213
21UR-5846	43	17	-2.5	0.000517
21UR-6645	89	36	-2.5	6.29e-07
21UR-1794	28	11	-2.5	0.00464
21UR-8645	51	20	-2.5	0.000146
21UR-2641	23	9	-2.5	0.00986
21UR-10970	59	23	-2.5	4.18e-05
21UR-1250	18	7	-2.5	0.0214
21UR-2904	54	21	-2.5	8.48e-05
21UR-1595	111	44	-2.5641	1.88e-08
21UR-6048	13	5	-2.5641	0.0476
21UR-6193	13	5	-2.5641	0.0476
21UR-3520	13	5	-2.5641	0.0476
21UR-2516	13	5	-2.5641	0.0476
21UR-6663	13	5	-2.5641	0.0476
21UR-1453	73	29	-2.5641	4.1e-06
21UR-9842	21	8	-2.5641	0.0119
21UR-7764	29	11	-2.5641	0.00314
21UR-8430	29	11	-2.5641	0.00314
21UR-5288	74	29	-2.5641	2.8e-06
21UR-10791	37	14	-2.5641	0.000861
21UR-2916	53	20	-2.63158	6.81e-05
21UR-2305	85	33	-2.63158	4.76e-07
21UR-10859	72	28	-2.63158	3.27e-06
21UR-5662	32	12	-2.63158	0.00179
21UR-13263	32	12	-2.63158	0.00179
21UR-5048	24	9	-2.63158	0.00664
21UR-421	40	15	-2.63158	0.000493
21UR-15382	147	56	-2.63158	3.23e-11
21UR-4224	27	10	-2.63158	0.00374
21UR-8536	27	10	-2.63158	0.00374
21UR-10590	219	83	-2.63158	3.36e-16
21UR-3471	76	29	-2.63158	1.29e-06
21UR-7702	19	7	-2.63158	0.0143
21UR-5550	19	7	-2.63158	0.0143
21UR-4637	19	7	-2.63158	0.0143
21UR-2698316	19	7	-2.63158	0.0143
21UR-13494	49	18	-2.7027	9.37e-05
21UR-3703	30	11	-2.7027	0.00211
21UR-3837	41	15	-2.7027	0.000332
21UR-12100	41	15	-2.7027	0.000332
21UR-7819	63	23	-2.7027	8.96e-06
21UR-241	22	8	-2.7027	0.00793
21UR-3850	84	31	-2.77778	2e-07
21UR-11790	56	20	-2.77778	2.09e-05
21UR-14399	28	10	-2.77778	0.00249
21UR-3864	14	5	-2.77778	0.0314
21UR-2076	14	5	-2.77778	0.0314
21UR-707	14	5	-2.77778	0.0314
21UR-1130	14	5	-2.77778	0.0314
21UR-3717	79	29	-2.77778	3.97e-07
21UR-4102	127	46	-2.77778	1.38e-10
21UR-2329	17	6	-2.77778	0.0171
21UR-7193	57	20	-2.77778	1.4e-05
21UR-4324	20	7	-2.77778	0.00943
21UR-1758	20	7	-2.77778	0.00943
21UR-9347	32	11	-2.85714	0.000934
21UR-6090	54	18	-2.94118	1.23e-05
21UR-6834	39	13	-2.94118	0.000199
21UR-1150	33	11	-2.94118	0.000614
21UR-672	24	8	-2.94118	0.00343
21UR-6815	18	6	-2.94118	0.0112
21UR-1896	12	4	-2.94118	0.038
21UR-5067	12	4	-2.94118	0.038
21UR-3592	12	4	-2.94118	0.038
21UR-6167	15	5	-2.94118	0.0204
21UR-4042	15	5	-2.94118	0.0204
21UR-11676	15	5	-2.94118	0.0204
21UR-4396	15	5	-2.94118	0.0204
21UR-8496	15	5	-2.94118	0.0204
21UR-9933	31	10	-3.0303	0.000708
21UR-2270	28	9	-3.0303	0.00125
21UR-3366	47	15	-3.0303	2.78e-05
21UR-5453	22	7	-3.125	0.00399
21UR-1714	22	7	-3.125	0.00399
21UR-5442	22	7	-3.125	0.00399
21UR-14118	22	7	-3.125	0.00399
21UR-3983	19	6	-3.125	0.0072
21UR-6978	19	6	-3.125	0.0072
21UR-1205	16	5	-3.125	0.0131
21UR-14303	16	5	-3.125	0.0131
21UR-9015	16	5	-3.125	0.0131
21UR-4140	16	5	-3.125	0.0131
21UR-9759	16	5	-3.125	0.0131
21UR-15675	26	8	-3.22581	0.00144
21UR-2013	13	4	-3.22581	0.0243
21UR-6431	13	4	-3.22581	0.0243
21UR-2909	13	4	-3.22581	0.0243
21UR-1012	23	7	-3.22581	0.00256
21UR-6091	33	10	-3.22581	0.000295
21UR-5185	20	6	-3.22581	0.0046
21UR-3981	20	6	-3.22581	0.0046
21UR-2058	10	3	-3.22581	0.0457
21UR-83	10	3	-3.22581	0.0457
21UR-12268	10	3	-3.22581	0.0457
21UR-9584	10	3	-3.22581	0.0457
21UR-601	10	3	-3.22581	0.0457
21UR-7510	10	3	-3.22581	0.0457
21UR-9259	10	3	-3.22581	0.0457
21UR-5130	10	3	-3.22581	0.0457
21UR-3756	10	3	-3.22581	0.0457
21UR-716	10	3	-3.22581	0.0457
21UR-1226	47	14	-3.33333	1.31e-05
21UR-5904	17	5	-3.33333	0.00833
21UR-4725	17	5	-3.33333	0.00833
21UR-3110	24	7	-3.33333	0.00163
21UR-9799	31	9	-3.33333	0.000331
21UR-11326	21	6	-3.44828	0.00291
21UR-3672	14	4	-3.44828	0.0153
21UR-3412	14	4	-3.44828	0.0153
21UR-1280	14	4	-3.44828	0.0153
21UR-5516	18	5	-3.57143	0.00523
21UR-2491	18	5	-3.57143	0.00523
21UR-5120	29	8	-3.57143	0.000367
21UR-548	73	20	-3.57143	1.37e-08
21UR-8114	22	6	-3.57143	0.00182
21UR-9402	11	3	-3.57143	0.0284
21UR-5594	11	3	-3.57143	0.0284
21UR-2861	11	3	-3.57143	0.0284
21UR-6356	11	3	-3.57143	0.0284
21UR-14536	11	3	-3.57143	0.0284
21UR-14450	11	3	-3.57143	0.0284
21UR-8810	11	3	-3.57143	0.0284
21UR-285	52	14	-3.7037	1.35e-06
21UR-2237	26	7	-3.7037	0.000645
21UR-12308	26	7	-3.7037	0.000645
21UR-9880	26	7	-3.7037	0.000645
21UR-3179	15	4	-3.7037	0.00948
21UR-10592	15	4	-3.7037	0.00948
21UR-9414	15	4	-3.7037	0.00948
21UR-5711	42	11	-3.7037	1.08e-05
21UR-7876	23	6	-3.7037	0.00114
21UR-1780	27	7	-3.84615	0.000401
21UR-3505	40	10	-4	1.15e-05
21UR-5231	20	5	-4	0.002
21UR-8302	16	4	-4	0.00583
21UR-4603	16	4	-4	0.00583
21UR-8378	12	3	-4	0.0174
21UR-5834	12	3	-4	0.0174
21UR-2056	12	3	-4	0.0174
21UR-1653	12	3	-4	0.0174
21UR-632	12	3	-4	0.0174
21UR-4721	8	2	-4	0.0543
21UR-5651	8	2	-4	0.0543
21UR-3017	8	2	-4	0.0543
21UR-5948	8	2	-4	0.0543
21UR-13776	8	2	-4	0.0543
21UR-15349	8	2	-4	0.0543
21UR-3232	8	2	-4	0.0543
21UR-4157	21	5	-4.16667	0.00122
21UR-7673	34	8	-4.16667	3.34e-05
21UR-7386	13	3	-4.16667	0.0105
21UR-2157	13	3	-4.16667	0.0105
21UR-1764	9	2	-4.34783	0.0324
21UR-5703	9	2	-4.34783	0.0324
21UR-14321	9	2	-4.34783	0.0324
21UR-10022	9	2	-4.34783	0.0324
21UR-15117	9	2	-4.34783	0.0324
21UR-3092	32	7	-4.54545	3.41e-05
21UR-2035	14	3	-4.54545	0.00628
21UR-3270	14	3	-4.54545	0.00628
21UR-15359	14	3	-4.54545	0.00628
21UR-2792	19	4	-4.7619	0.00128
21UR-3006	10	2	-5	0.0191
21UR-687	10	2	-5	0.0191
21UR-8436	10	2	-5	0.0191
21UR-2177	10	2	-5	0.0191
21UR-15226	5	0	-5	0.0311
21UR-13202	5	0	-5	0.0311
21UR-8059	5	0	-5	0.0311
21UR-8274	5	0	-5	0.0311
21UR-2940	5	0	-5	0.0311
21UR-7496	5	0	-5	0.0311
21UR-5216	5	0	-5	0.0311
21UR-9373	5	0	-5	0.0311
21UR-11043	5	0	-5	0.0311
21UR-6222	5	0	-5	0.0311
21UR-2927	5	0	-5	0.0311
21UR-11909	5	0	-5	0.0311
21UR-5624	5	0	-5	0.0311
21UR-8969	5	0	-5	0.0311
21UR-5849	5	0	-5	0.0311
21UR-2562	5	0	-5	0.0311
21UR-4739	47	9	-5	1.23e-07
21UR-10688	21	4	-5.26316	0.000446
21UR-14403	11	2	-5.26316	0.0111
21UR-10156	17	3	-5.55556	0.00127
21UR-126	12	2	-5.88235	0.00639
21UR-6221	12	2	-5.88235	0.00639
21UR-5060	12	2	-5.88235	0.00639
21UR-5053	12	2	-5.88235	0.00639
21UR-3996	6	0	-5.88235	0.0155
21UR-2741	6	0	-5.88235	0.0155
21UR-1111	6	0	-5.88235	0.0155
21UR-2939	6	0	-5.88235	0.0155
21UR-837	6	0	-5.88235	0.0155
21UR-4494	6	0	-5.88235	0.0155
21UR-8849	13	2	-6.25	0.00365
21UR-6258	13	2	-6.25	0.00365
21UR-15137	14	2	-6.66667	0.00206
21UR-1715	7	1	-6.66667	0.0349
21UR-12122	7	1	-6.66667	0.0349
21UR-4614	7	1	-6.66667	0.0349
21UR-6333	7	1	-6.66667	0.0349
21UR-8044	7	0	-7.14286	0.00775
21UR-1690	7	0	-7.14286	0.00775
21UR-6421	7	0	-7.14286	0.00775
21UR-15220	7	0	-7.14286	0.00775
21UR-9050	7	0	-7.14286	0.00775
21UR-143	7	0	-7.14286	0.00775
21UR-3647	7	0	-7.14286	0.00775
21UR-1910	15	2	-7.14286	0.00116
21UR-3197	8	1	-7.69231	0.0194
21UR-7118	8	1	-7.69231	0.0194
21UR-5738	8	1	-7.69231	0.0194
21UR-12849	8	1	-7.69231	0.0194
21UR-4291	8	1	-7.69231	0.0194
21UR-10317	8	1	-7.69231	0.0194
21UR-3587	8	1	-7.69231	0.0194
21UR-2732	8	0	-7.69231	0.00387
21UR-3344	8	0	-7.69231	0.00387
21UR-7753	8	0	-7.69231	0.00387
21UR-4898	8	0	-7.69231	0.00387
21UR-1465	8	0	-7.69231	0.00387
21UR-819	9	1	-9.09091	0.0106
21UR-8229	9	1	-9.09091	0.0106
21UR-3417	9	1	-9.09091	0.0106
21UR-514	10	0	-10	0.000966
21UR-3937	12	1	-12.5	0.00169
21UR-6047	12	1	-12.5	0.00169
21UR-13611	16	1	-16.6667	0.000135

## Sheet: Overlap
	adr-1	adr-2	adr-1;adr-2
21UR-1	1.49041		-1.21951
21UR-10000	-9.24
21UR-1002		7.13
21UR-10022			-4.34783
21UR-10047		1.45	-1.36986
21UR-10057	-1.67063	-1.44928	-1.88679
21UR-10068			-2.27273
21UR-10072	-2.805		-2.04082
21UR-10080			-2.04082
21UR-1012			-3.22581
21UR-1014		-2
21UR-10156		-2.38095	-5.55556
21UR-1016	1.75042		-1.75439
21UR-10180		-2.22222
21UR-10192	-1.20468		-1.53846
21UR-102		-2.08333	-2.43902
21UR-10207		-2
21UR-1021	1.7316		-1.51515
21UR-1022	-4.62
21UR-10268	1.59795	-1.35135	-2.22222
21UR-10274		-1.51515	-1.47059
21UR-10275		-1.6129	-2.12766
21UR-10317		-7.69231	-7.69231
21UR-10319	-1.63477		-2.17391
21UR-10325	1.38263	-1.25	-1.44928
21UR-10327	44
21UR-10328		3.96
21UR-10353		-2.04082	-1.72414
21UR-10359	-13.86
21UR-10414	4.88889		-1.42857
21UR-10474		-3.22581
21UR-10491			-2.32558
21UR-1050		-1.42857	-1.66667
21UR-10506	-4.62
21UR-1051	1.60219	-1.66667	-1.20482
21UR-10514		-3.33333
21UR-1052	-2.05333
21UR-10526	-1.67454	-1.85185
21UR-10527	1.64502
21UR-1055		2.23
21UR-10560	2.95159		-2.32558
21UR-10582		-5
21UR-10590	-1.41503	-1.47059	-2.63158
21UR-10592			-3.7037
21UR-10617		-1.2987	-1.51515
21UR-10633		-2.38095
21UR-10640	1.38783	-1.35135	-1.75439
21UR-10688			-5.26316
21UR-1069	-1.49838		-1.75439
21UR-10694		3.57
21UR-10698	-4.62
21UR-107		-5
21UR-1073			-2
21UR-10772	-2.805
21UR-1078		-1.35135	-1.5625
21UR-10791			-2.5641
21UR-10819	2.02714		-1.75439
21UR-10832		-2.22222
21UR-10851		-5
21UR-10859			-2.63158
21UR-10914	-3.08
21UR-10937	2.32434		-2.17391
21UR-10946	-9.24
21UR-10962			3.06
21UR-10970		-1.72414	-2.5
21UR-10976			-2.17391
21UR-10981	-11.55
21UR-10996	2.96717
21UR-11000		-1.25	-1.92308
21UR-1102	-8.47
21UR-11043			-5
21UR-11087	1.28275		-1.63934
21UR-1111			-5.88235
21UR-11168		2.29
21UR-11195	-8.085
21UR-112		-2.22222	-1.47059
21UR-11202		-2.08333
21UR-11225	1.52666		-2.12766
21UR-1124		-1.38889	-1.78571
21UR-11241		-5
21UR-1127			8.16
21UR-1130			-2.77778
21UR-11326		-2.5	-3.44828
21UR-11332		-6.66667
21UR-11335			-2.17391
21UR-1134			3.4
21UR-11340	2.98701
21UR-11349		-5
21UR-1137	1.45286	-1.42857	-1.66667
21UR-11385	9.95671
21UR-11391	-1.75875		-2.32558
21UR-11392			-2.27273
21UR-11398		-5
21UR-11415	-1.22414	-1.40845	-1.92308
21UR-11425	-16.17
21UR-1143	2.21543	-2.85714	-1.53846
21UR-11479		-2.08333	-1.96078
21UR-1150		-2.5	-2.94118
21UR-11506	-1.66207	-1.53846	-1.5625
21UR-11521		4.76
21UR-1153		-2.38095	-1.96078
21UR-11543	1.86447	-1.33333
21UR-1156		2.97
21UR-11560	16
21UR-116	3.44369	-1.20482
21UR-11601	1.70537		-1.6129
21UR-11608	-3.234
21UR-1161	-2.37794
21UR-11623	-2.464
21UR-1166	2.47372		-1.6129
21UR-11676			-2.94118
21UR-11712	-2.09512
21UR-11732			-2.32558
21UR-11790		-1.42857	-2.77778
21UR-11802	-1.32078	-1.5873	-2.27273
21UR-11806		-1.75439	-1.44928
21UR-1181	-1.95067	-2.38095	-1.85185
21UR-11813	1.5141	-1.23457	-1.5873
21UR-11837	-8.085
21UR-11883	1.44893		-1.25
21UR-11885	-1.2715	-1.47059	-1.92308
21UR-1190		-1.38889	-1.69492
21UR-11901	-2.12066		-1.44928
21UR-11909			-5
21UR-11915		-1.2987	-1.6129
21UR-1193	-2.57654		-1.5873
21UR-11940	-11.55
21UR-11965	1.2257	-1.81818	-1.28205
21UR-11976	1.6354		-1.40845
21UR-1200	1.28507	-1.28205	-1.92308
21UR-12002	-1.881		-1.92308
21UR-1205			-3.125
21UR-12050	19
21UR-12095		-9.09091
21UR-121			-2
21UR-12100			-2.7027
21UR-12122			-6.66667
21UR-1215	15
21UR-1216		-1.53846	-1.36986
21UR-12167		3.27
21UR-1218	1.47186	-1.35135	-1.53846
21UR-1219	-2.07375		-2.08333
21UR-1226		-1.88679	-3.33333
21UR-12261		-1.36986	-1.26582
21UR-12268	17		-3.22581
21UR-12283	-2.15069
21UR-12308			-3.7037
21UR-12351	-2.695	-2.22222
21UR-12377	-1.88517	-1.78571	-1.63934
21UR-12393	-3.08
21UR-12451	2.0475		-1.31579
21UR-12462	1.33533	-1.25	-2.04082
21UR-12478	-3.96
21UR-1250			-2.5
21UR-12509	-1.26628	-1.75439	-1.5625
21UR-1251	-2.82975
21UR-12528			-2.17391
21UR-12545	-8.6625
21UR-12558		-5
21UR-1258	1.45359	-1.35135
21UR-126			-5.88235
21UR-1260		-1.78571	-1.75439
21UR-12608	-2.94
21UR-12623	-2.58176		4.59
21UR-12629	1.63934		-1.72414
21UR-12631		-1.72414	-1.69492
21UR-1267	-1.21594		-1.44928
21UR-12690	-1.3982		-1.53846
21UR-1270	-2.43158
21UR-1273		-1.53846	-2.17391
21UR-1274		-2.17391
21UR-12756	-3.85
21UR-1280			-3.44828
21UR-12820	2.01533	-1.26582	-1.78571
21UR-12849			-7.69231
21UR-12851		4.76
21UR-12855	-3.63
21UR-12891	-3.60938
21UR-12908	-2.01194	-1.40845	-1.38889
21UR-12910	-1.59176	1.47	-1.36986
21UR-1294	-1.74041		-1.47059
21UR-12966	-4.158
21UR-130	-3.11348
21UR-13005			-2.43902
21UR-13046	-2.2176
21UR-13053	2.66955
21UR-13099		-2.77778	-2.43902
21UR-1311	1.3918		-1.40845
21UR-1312	2.27361
21UR-1315	-1.55791	-1.66667	-1.88679
21UR-13183		-1.40845	-2.32558
21UR-13192	2.1645		-1.47059
21UR-13202		-5	-5
21UR-1325		-5.88235
21UR-13252		5.94
21UR-13263			-2.63158
21UR-13269		-5.88235
21UR-13283	3.3189
21UR-13309			-2
21UR-1332	-2.03324	-1.33333	-1.53846
21UR-13337		-1.26582	-1.69492
21UR-13341	-1.47733		-1.53846
21UR-13345	14	-5.88235
21UR-13361	-2.64		-1.63934
21UR-13367		-1.20482	-1.5625
21UR-13388	3.30579	-1.28205	-1.69492
21UR-1339	-2.11547		-1.6129
21UR-13396		-5
21UR-13403	-1.55863		-1.72414
21UR-13415	-4.62
21UR-1342	-2.31	-1.49254	-2.04082
21UR-13494			-2.7027
21UR-13501		-1.69492	-2.08333
21UR-13518	-9.24
21UR-1353	-2.28038		-1.35135
21UR-1354		10.7
21UR-13541	-5.775
21UR-13559	-2.27603
21UR-1357		4.76
21UR-13599	-5.544	-3.33333
21UR-13611		-2.7027	-16.6667
21UR-13614	-9.24
21UR-13680	3.61248	1.62	1.63
21UR-13691	-1.95763		-1.51515
21UR-13711	-11.55
21UR-13730		-1.42857	-1.69492
21UR-13731	-9.24
21UR-1374		-2.04082
21UR-13746		-1.5625	-1.81818
21UR-13776	-3.465		-4
21UR-13819		-2.04082
21UR-13821	3.3189
21UR-13875	-2.45437		-1.78571
21UR-1393	2.99423
21UR-13962		-5
21UR-13971		-6.66667
21UR-14		-1.21951	-2.12766
21UR-14107	2.09235
21UR-14116	-1.32802	-1.53846	-1.63934
21UR-14118			-3.125
21UR-1413	-2.1
21UR-14131	-1.97195		-1.42857
21UR-1415	-3.97833		-2.22222
21UR-14169		2.97
21UR-14294	-3.2725
21UR-14299		-1.44928	-1.53846
21UR-143			-7.14286
21UR-14303			-3.125
21UR-14321			-4.34783
21UR-14347	1.41195		-1.53846
21UR-14355	-1.19633	-1.20482	-1.81818
21UR-14356	-1.84057		-1.75439
21UR-14395	2.8379
21UR-14399			-2.77778
21UR-14402	-11.55
21UR-14403			-5.26316
21UR-14421			-2.38095
21UR-14430	4.97835
21UR-14450			-3.57143
21UR-14458	-11.55
21UR-14467	2.72624		-1.85185
21UR-14482	-4.158
21UR-14485		-2.04082
21UR-1453		-1.36986	-2.5641
21UR-14536		-4.54545	-3.57143
21UR-1454	1.25935	-2.17391
21UR-14571	4.329	-1.5625	-1.81818
21UR-14591			-2.08333
21UR-14620	-4.87667
21UR-1465			-7.69231
21UR-1466			-2.08333
21UR-147	-2.26471
21UR-14714		-2.22222
21UR-14731	2.5974
21UR-14735	1.68184	1.35
21UR-1476	1.75909	1.45
21UR-1486	-1.86897		-1.35135
21UR-14918	-9.24
21UR-14938		-2.12766	-2.12766
21UR-14953	-2.66538
21UR-14967		-1.33333	-1.78571
21UR-1498	1.54739	-1.88679
21UR-15012	1.34525	1.26	-1.33333
21UR-1504			-2.43902
21UR-15077			-2.22222
21UR-15114	1.35877		-1.78571
21UR-15117			-4.34783
21UR-15137			-6.66667
21UR-15172	-2.55973
21UR-15217	-1.302	-1.44928	-1.72414
21UR-15220			-7.14286
21UR-15226			-5
21UR-1526	-2.84308
21UR-1531	-2.19732		-2.17391
21UR-15325			-2.17391
21UR-15338	-2.07447	-1.78571	-1.47059
21UR-15349			-4
21UR-1535	-2.0405
21UR-15352		-1.31579	-1.53846
21UR-15359			-4.54545
21UR-15382		-1.49254	-2.63158
21UR-15427		-6.66667
21UR-15452			-2.32558
21UR-15512		-1.63934	-1.25
21UR-15571	-1.98405		-1.36986
21UR-15577	1.81745		-1.49254
21UR-1561		-1.72414	-1.26582
21UR-15616		-1.72414	-1.81818
21UR-15623	-3.465
21UR-15664	1.60324		-1.5625
21UR-15675	-2.64		-3.22581
21UR-15688	2.01008	-1.25	-1.78571
21UR-1578	-1.70793	-1.51515	-1.81818
21UR-1581		-2.08333	-1.75439
21UR-1588	-2.38787		-1.85185
21UR-1595		-1.31579	-2.5641
21UR-1612	-1.5451		-1.5625
21UR-1615	2.36822		-1.78571
21UR-1618	5.83142	-1.23457	-2.38095
21UR-1621			-2.22222
21UR-1623	2.30056	-1.47059	-2.12766
21UR-163	2.67857		-1.5873
21UR-1632		-1.2987	-1.5625
21UR-1634			6.12
21UR-1635	8.22511
21UR-1653			-4
21UR-1668		-2	-2.12766
21UR-1678	2.5974		-1.85185
21UR-1685		-1.88679	-2.17391
21UR-1687	-1.21889		-1.38889
21UR-1688	-2.8875
21UR-1690			-7.14286
21UR-1703	-1.92153		-1.44928
21UR-1705	-1.74496	-1.23457	-1.69492
21UR-1713			-2.08333
21UR-1714			-3.125
21UR-1715			-6.66667
21UR-1719	-1.70824	-1.78571	-2
21UR-1723			9.18
21UR-1727	-1.85408	-1.88679	-2.04082
21UR-1731	1.41661	1.82
21UR-1740		-1.35135	-1.36986
21UR-1758			-2.77778
21UR-1764			-4.34783
21UR-1772			-2.04082
21UR-1778		-1.5625	-1.69492
21UR-1779	-1.54579	-1.20482	-1.26582
21UR-1780			-3.84615
21UR-1790		-1.63934	-1.72414
21UR-1790254	-3.06026
21UR-1793	-1.23037		-1.66667
21UR-1794	-3.21391	-4	-2.5
21UR-1797176	-1.70333	-3.125
21UR-1798939	4.329
21UR-18	22
21UR-1804	-2.5862
21UR-1824	2.57267
21UR-1831170		-1.51515	-2.22222
21UR-1837	-1.95067	-2	-2.32558
21UR-1838			-2.32558
21UR-1839506	-1.39703	-1.36986
21UR-1842	-1.61318		-1.31579
21UR-1845094		-1.47059	-1.51515
21UR-1848	1.46002	-1.81818	-1.88679
21UR-1851		-2.08333
21UR-1868		-1.23457	-2.12766
21UR-1871	-1.69491		-1.96078
21UR-1876	1.99615		-1.44928
21UR-1892	-2.618
21UR-1896			-2.94118
21UR-1910			-7.14286
21UR-1919	2.08608	-1.53846	-1.85185
21UR-1922028			-2.27273
21UR-1925791	-1.722		-1.6129
21UR-1926854		4.76
21UR-1973912	1.27777	-1.40845	-1.21951
21UR-1983	-1.25196		-1.96078
21UR-1986	2.13904
21UR-1992	2.87346
21UR-2000		1.23	-1.42857
21UR-2013			-3.22581
21UR-2014236		-1.20482	-1.25
21UR-2026	-2.31
21UR-2035			-4.54545
21UR-2037	1.24868		-1.6129
21UR-2043	-4.62
21UR-2049			-2.12766
21UR-2052	-1.40268	-1.36986	-1.2987
21UR-2056			-4
21UR-2057		-1.96078	-1.88679
21UR-2058			-3.22581
21UR-2061	3.8961
21UR-2076		-2.94118	-2.77778
21UR-2077		4.76
21UR-208	2.01089		-1.72414
21UR-209	-2.16097
21UR-2099		-7.69231
21UR-212	-1.31		-1.44928
21UR-213	-2.05333
21UR-2147	2.17575		-1.53846
21UR-2154	-9.24
21UR-2156	-4.62
21UR-2157			-4.16667
21UR-2159	-3.255	-2.08333
21UR-2161	6.49351
21UR-2168	-4.235
21UR-2177			-5
21UR-2179			-2.04082
21UR-2192	3.0303
21UR-2205		-7.14286	-1.75439
21UR-2220		-2.77778
21UR-2226		-2.5	-2.22222
21UR-2228	-13.86
21UR-2232		9.51
21UR-2235		-1.69492	-1.88679
21UR-2237			-3.7037
21UR-2237322	2.17245
21UR-2241	13
21UR-2245			-2.08333
21UR-2246			7.14
21UR-225	1.32756	-1.25	-1.40845
21UR-2262		-2.77778
21UR-2266	-1.35623		-1.53846
21UR-2270			-3.0303
21UR-2273	7.79221
21UR-2275	-1.4783	-1.35135	-1.40845
21UR-2277	14
21UR-2277678	2.06675
21UR-228	-1.34658		-1.5873
21UR-2289			-2.08333
21UR-2290	-1.45588		-1.81818
21UR-2295		-2
21UR-2297		-2.22222
21UR-2305			-2.63158
21UR-2309	-2.21375	1.54	-1.78571
21UR-2314	1.70686		-1.63934
21UR-2327	-5.88
21UR-2329			-2.77778
21UR-2336	2.05058
21UR-2343	-2.31
21UR-2373		5.94
21UR-2381			5.1
21UR-2385	-4.312	-2.7027
21UR-2400	1.8145		-1.5625
21UR-2404		2.97
21UR-241		-2.63158	-2.7027
21UR-2446		-5
21UR-2464	-4.158
21UR-2467	-2.34554	-2.43902	-1.92308
21UR-2470	2.5974
21UR-2477	1.55451		-1.53846
21UR-2486	-1.50359		-1.5873
21UR-2491			-3.57143
21UR-250			6.12
21UR-2506242	-2.31
21UR-2508	-3.63
21UR-2513	-2.24921		3.4
21UR-2516	8.65801		-2.5641
21UR-2527415	7.14286
21UR-2540	-2.73429
21UR-2542	-1.995
21UR-2545	-2.95602	1.52
21UR-2546829	-2.002
21UR-2553878			-2.38095
21UR-2558	2.1645		-1.78571
21UR-2560195	1.64835		1.92
21UR-2562			-5
21UR-2563		-1.26582	-1.49254
21UR-2573	-4.62
21UR-2574	-2.74585	-2.08333	-2.27273
21UR-2576	-2.86		-2.04082
21UR-258	-2.849		-1.72414
21UR-2584		-1.75439	-1.5873
21UR-2584780	-2.23169	-2.04082	-1.44928
21UR-2586		-2.12766
21UR-2587		-2.5
21UR-2589	1.57189	-1.25	-1.51515
21UR-2594		-5
21UR-2594170		-1.33333	-2.08333
21UR-2596	4.6176
21UR-260	-8.085
21UR-2603	-2.40625
21UR-2623		-1.92308	-2.22222
21UR-2636		3.57
21UR-2641			-2.5
21UR-2641809	-2.20379
21UR-2646464	-2.56667
21UR-2660	-2.244		-1.81818
21UR-2683	-2.07103
21UR-2688	-2.41744	-1.78571
21UR-2689	1.56284		-1.44928
21UR-2691291	3.4632
21UR-2698316	-2.16857	-5.26316	-2.63158
21UR-2708		2.97
21UR-2710	-1.65986		-1.63934
21UR-2712	1.47598		-1.6129
21UR-2714	-2.08185
21UR-2717643	1.38701	-1.2987	-1.53846
21UR-2718		2.38	2.04
21UR-272			2.85
21UR-2721	1.20067		-1.63934
21UR-2722		5.94
21UR-2728	1.81818		-2.04082
21UR-2732			-7.69231
21UR-2733	-11.55
21UR-2741			-5.88235
21UR-2742	29	-2.43902	-1.44928
21UR-2742448		-2.32558	-2.17391
21UR-2743	-2.61427		-1.96078
21UR-2744854	-13.86
21UR-2745191	-1.65051		-1.5873
21UR-2752	5.84416		-1.63934
21UR-2757	5.05051
21UR-2761	1.20077	-1.21951	-1.92308
21UR-2769		-2.27273
21UR-2784	-2.16702	-1.33333
21UR-2785		-3.0303
21UR-279	1.30502	-1.40845	-2.38095
21UR-2792			-4.7619
21UR-280	1.7316		1.6
21UR-2809		-3.7037
21UR-2814			-2.38095
21UR-2816	1.49473	-1.31579	-2
21UR-2826	-2.1945	-1.26582	-1.6129
21UR-2841	2.66328
21UR-2843		-1.21951	-2.38095
21UR-2845	1.38172	-1.26582	-1.21951
21UR-285			-3.7037
21UR-2851	-12.705	-7.69231
21UR-2857	2.04369
21UR-2861		-4.54545	-3.57143
21UR-2863	-3.27923
21UR-2874		4.76
21UR-2875	-1.33567		-1.6129
21UR-2876		-4.16667
21UR-2883	-2.51087
21UR-2889		-2.38095
21UR-2891	-1.28388	-1.28205	-1.6129
21UR-2896		-2.5	-2.12766
21UR-2898		-1.5873	-1.92308
21UR-2904			-2.5
21UR-2906	19
21UR-2909			-3.22581
21UR-2916			-2.63158
21UR-2927			-5
21UR-2935	-1.28237	-1.53846	-1.75439
21UR-2939			-5.88235
21UR-294		-1.33333	-2.17391
21UR-2940			-5
21UR-2955	-2.20256
21UR-2972	6.92641
21UR-2979	-3.255
21UR-2983	2.20386		-1.96078
21UR-2995		-5.88235
21UR-30	-4.0425
21UR-3006			-5
21UR-3017			-4
21UR-3026	-3.03187		-1.88679
21UR-3029		-1.35135	-1.42857
21UR-3036	1.69102		-1.85185
21UR-304	-1.60302		-1.81818
21UR-3056	-2.31
21UR-3072	-1.8744	-1.63934	-1.44928
21UR-3074			-2.04082
21UR-3078		-1.36986	-1.6129
21UR-3085	-1.86725	-1.88679	-1.85185
21UR-3086		-6.66667
21UR-3092		-1.92308	-4.54545
21UR-3093	2.17653
21UR-3099			-2.32558
21UR-3101			-2
21UR-3103		1.51	-1.35135
21UR-3106	1.20787	-1.38889	-1.66667
21UR-311	2.68398	2.55
21UR-3110		-2	-3.33333
21UR-3117		-1.69492	-1.33333
21UR-3120	11.6883
21UR-3142	1.63648		-1.2987
21UR-3156	-2.1227
21UR-3177	-20.79
21UR-3179			-3.7037
21UR-3180	-1.39023		-1.5873
21UR-3181			2.55
21UR-3184			-2.32558
21UR-3191			-2.43902
21UR-3194	2.08579
21UR-3197			-7.69231
21UR-32	-4.03971	-1.5873	-1.72414
21UR-3205	-5.62245
21UR-3210	-4.0425	7.13
21UR-3213	-2.51737		-1.72414
21UR-3214		-1.5873	-1.75439
21UR-3215	-1.28862	-1.26582	-2.27273
21UR-3224	-1.45206		-1.42857
21UR-3232			-4
21UR-3235	-3.22099	1.21	-1.69492
21UR-3242	-1.81235	-1.21951	-1.33333
21UR-3244	-2.17	-1.69492
21UR-3246	-1.3519		-1.28205
21UR-3270			-4.54545
21UR-3289		-7.69231
21UR-3298	2.00989
21UR-3299		-1.63934	-1.92308
21UR-3322	3.67965	1.78
21UR-3332	-7.7
21UR-3335	-6.3525	5.35
21UR-3336	1.7316		-1.81818
21UR-3343		5.94
21UR-3344			-7.69231
21UR-3366			-3.0303
21UR-3370		-1.2987	-1.88679
21UR-3372	-1.31431		-1.36986
21UR-3380	-1.49947	1.28	-1.6129
21UR-3387	-1.49471		-1.47059
21UR-3396	3.8961
21UR-3412		-4	-3.44828
21UR-3417			-9.09091
21UR-3425	-2.02125	-2.12766	-1.88679
21UR-3430	-1.50652		-1.49254
21UR-3435	-16.17
21UR-3439			-2.12766
21UR-3445	-11.55
21UR-3455	-2.22549
21UR-3461	-6.56906		-2.12766
21UR-3470	2.56534	-1.28205	-1.63934
21UR-3471		-1.38889	-2.63158
21UR-3473		-2.27273
21UR-3492	-9.24
21UR-3495	-2.35915
21UR-35	-2.8875
21UR-3505		-1.78571	-4
21UR-3511	-1.63625		-1.49254
21UR-3513			-2.22222
21UR-3520			-2.5641
21UR-3538	-2.2275
21UR-3545	-1.64621	-2.04082
21UR-3555		-1.5625	-2.12766
21UR-3556		-2.7027
21UR-3558	-2.37794
21UR-3559	-2.49237	4.76
21UR-3562	-3.78	-2.94118
21UR-3574	-16.17
21UR-3575	1.61616	-1.51515	-1.81818
21UR-3587			-7.69231
21UR-3592			-2.94118
21UR-3594	-11.3618	-1.92308	-1.6129
21UR-3599	13
21UR-3601	-1.51919	-1.81818	-1.69492
21UR-3636		-2.5
21UR-3642		-1.23457	-1.88679
21UR-3647			-7.14286
21UR-3651	1.32268	-1.49254	-1.47059
21UR-3659		2.01
21UR-366	-3.388
21UR-3672		-2.94118	-3.44828
21UR-3678	-6.16
21UR-368	-5.082
21UR-3693	2.05937		-1.42857
21UR-3699	-2.91789	-2.43902
21UR-3701			9.18
21UR-3702	1.66178	1.32	-1.49254
21UR-3703			-2.7027
21UR-3706	1.64248		3.47
21UR-3707		-2.77778
21UR-3717		-1.38889	-2.77778
21UR-3721		-1.35135	-1.96078
21UR-3727	-2.95167
21UR-3733		-1.36986	-1.5625
21UR-3740			-2.43902
21UR-3748		-2.85714
21UR-3754	3.29004	-5
21UR-3756		-4.16667	-3.22581
21UR-3761	1.25283	-1.35135	-1.63934
21UR-3775		-1.28205	-1.92308
21UR-3787	3.13853
21UR-3794		-5
21UR-380	2.05058		-1.2987
21UR-3801		-1.44928	-1.5625
21UR-3809	-1.71	-1.78571	-1.88679
21UR-3810	24
21UR-3821		-5.88235
21UR-3825	7.14286
21UR-383	1.96078		-1.92308
21UR-3837			-2.7027
21UR-3848		2.04
21UR-3850	1.62338		-2.77778
21UR-3860			5.1
21UR-3864			-2.77778
21UR-3871	-1.60823		-1.36986
21UR-3872	-2.39885
21UR-3875			-2
21UR-388		-1.28205	-2.04082
21UR-3890		-1.78571	-1.5625
21UR-3910			-2.27273
21UR-3913	-1.99784
21UR-3926		-1.23457	-1.38889
21UR-3935	-2.541
21UR-3937			-12.5
21UR-3954		-4.16667
21UR-3963		-1.40845	-2.12766
21UR-3969		-1.31579	-1.63934
21UR-3978	-1.64915	-1.21951	-1.5873
21UR-3981			-3.22581
21UR-3983			-3.125
21UR-3988	-3.75375
21UR-399	1.84384	-2.17391
21UR-3996			-5.88235
21UR-400	1.85529	-1.42857	-1.92308
21UR-4008		-1.49254	-1.44928
21UR-4013	2.94372
21UR-4021	-2.205
21UR-4022		2.23
21UR-4026	2.1645
21UR-4032	1.93939		-2.12766
21UR-4040	4.65368
21UR-4042			-2.94118
21UR-4044	-5.775
21UR-4050		-2.08333
21UR-4052		-1.5873	1.56
21UR-4062			3.06
21UR-4063	1.93968	-1.33333
21UR-4078	2.48918
21UR-4102			-2.77778
21UR-4107	-2.19154
21UR-4117	-2.926
21UR-4130	2.69909	2.47	2.35
21UR-4140			-3.125
21UR-4148	1.37796		-1.49254
21UR-4157			-4.16667
21UR-4160	18
21UR-4163		-2.04082
21UR-4171	-1.49362	-2.04082	-1.53846
21UR-4181	-1.605		-1.44928
21UR-4190		1.91	1.86
21UR-4204	-2.1175
21UR-421			-2.63158
21UR-4224			-2.63158
21UR-4225			9.18
21UR-4234	-2.145
21UR-4238		-1.2987	-1.72414
21UR-4239		4.76
21UR-4250		-2.27273	-1.42857
21UR-4253	1.61255		-1.88679
21UR-4258		-1.88679	-1.38889
21UR-4262		-3.125
21UR-4264	2.3539	-1.6129	-1.40845
21UR-4273	-2.90231
21UR-4276		-5.88235
21UR-4279	7.79221	-2.38095
21UR-4286	-1.32627		-1.6129
21UR-4287	-2.11479	-1.44928	-1.63934
21UR-4288		-1.85185	-2.12766
21UR-4291			-7.69231
21UR-4292	2.35081		-1.33333
21UR-4304	-4.62
21UR-4324			-2.77778
21UR-4337			3.4
21UR-4338	1.5647		-1.2987
21UR-4340		-1.28205	-1.6129
21UR-4345	-11.55
21UR-4347	-3.08		-1.78571
21UR-4349	1.70552	-1.81818
21UR-4352		2.89
21UR-4362		-2.38095	-2.08333
21UR-4369		-1.38889	-1.75439
21UR-4375		-5.55556	-2.04082
21UR-4387		-2.27273
21UR-4396			-2.94118
21UR-4402		-1.2987	-1.6129
21UR-4403	-6.93
21UR-4415	3.37662
21UR-442			2.45
21UR-4425	1.36933	-1.33333
21UR-4426	-2.06161		-1.5873
21UR-4428	-2.8875
21UR-4429	2.53327
21UR-4433	-1.61916	-1.23457	-1.69492
21UR-4434	-2.05749
21UR-4453			7.14
21UR-4457	-4.158
21UR-4459	1.57573		-1.5873
21UR-4467		-1.63934	-1.92308
21UR-4473	-6.93
21UR-4475			-2
21UR-4483	-6.24191
21UR-4485	2.0278
21UR-4494			-5.88235
21UR-4498	-6.16
21UR-4502	-1.6529		-1.44928
21UR-4509	1.72632	-1.2987	-1.72414
21UR-4510		-2	-1.92308
21UR-4514		-2.5	-2.32558
21UR-4531		7.13	5.1
21UR-4535	-8.085	-9.09091
21UR-4537	1.46058		-1.92308
21UR-4539		-1.53846	-1.69492
21UR-456	2.28819
21UR-4571		-1.63934	-1.49254
21UR-4576		-4.54545
21UR-4589	-1.79601		-2.08333
21UR-46	-3.04244
21UR-4603			-4
21UR-4605		-1.6129	-1.78571
21UR-4606			-2.08333
21UR-4614			-6.66667
21UR-4619		-2.08333
21UR-4637		-2.63158	-2.63158
21UR-4638	-1.24334	-1.96078	-1.47059
21UR-4640		-2.5641	-2.43902
21UR-4652	10.8225
21UR-4656	-2.8
21UR-4658	1.27722		-1.5873
21UR-4668		-1.5873	-1.75439
21UR-467	-1.88208	-1.21951	-1.5625
21UR-4671		-1.96078	-1.85185
21UR-4684	-1.74679	-1.5873	-1.78571
21UR-4694	-2.31
21UR-4696		-2.04082
21UR-470		1.82	2.46
21UR-4706	3.20346
21UR-471	-2.08275		-1.28205
21UR-4721			-4
21UR-4723		-1.28205	-1.96078
21UR-4725			-3.33333
21UR-4728	1.65143
21UR-4737		-1.40845	-1.6129
21UR-4739	-2.56667		-5
21UR-4743	-2.805
21UR-4748	1.84144	-1.21951	-1.88679
21UR-4755		-1.53846	-1.36986
21UR-4757			-2.38095
21UR-4769	19
21UR-477		4.76	5.1
21UR-4785	-1.39974	2.38
21UR-4795			4.42
21UR-4807	1.85786	-1.72414
21UR-4811	13
21UR-4819	-1.39681	-1.49254	-1.81818
21UR-4826	-3.59333
21UR-4835	-1.61264	-1.28205	-1.69492
21UR-4854		-1.85185	-1.44928
21UR-4861		-1.2987	-1.66667
21UR-4864	1.60647		-1.78571
21UR-4873	-3.234
21UR-4879		5.94
21UR-4880		-1.49254	-2.08333
21UR-4882	-1.87149		-1.51515
21UR-4883		-1.25	-1.2987
21UR-4890	-2.00705		-1.69492
21UR-4898			-7.69231
21UR-4899	1.39384	1.28	-1.38889
21UR-4910	-3.234
21UR-4922	1.70614		-1.44928
21UR-4934		7.13
21UR-4941	-10.395
21UR-4943		-1.28205	-1.49254
21UR-4969			7.14
21UR-4970	1.9295	-1.75439	-2.38095
21UR-4972	1.48876	-1.75439	-2.12766
21UR-4976	1.28886	-1.49254	-1.78571
21UR-4978	1.97825	1.23	-1.40845
21UR-4985	2.56789		-1.96078
21UR-4986	-3.05735
21UR-5008	-1.31527	-1.72414	-1.28205
21UR-5016	4.97835
21UR-5021		2.97
21UR-5025	2.419		-1.26582
21UR-5033	-9.24
21UR-504	-2.94724
21UR-5041	-3.72248		-1.44928
21UR-5045		1.22	-1.31579
21UR-5048			-2.63158
21UR-5053		-3.33333	-5.88235
21UR-5060			-5.88235
21UR-5061		2.53
21UR-5065	-3.33667
21UR-5067		-3.33333	-2.94118
21UR-507	-1.94214		-1.49254
21UR-5077	1.46604		-1.69492
21UR-5101	-1.76514	-1.26582	-1.49254
21UR-5107	-1.665		-1.38889
21UR-5109	-2.51409	-1.47059	-1.75439
21UR-5113		-7.14286
21UR-5120			-3.57143
21UR-5130			-3.22581
21UR-5139		-2.04082	-2.17391
21UR-514			-10
21UR-5142	2.10667	-1.44928	-1.72414
21UR-5166		3.33
21UR-5167	4.25685
21UR-5169		-2.5
21UR-5170		-1.44928	-1.96078
21UR-518		-1.21951	-1.49254
21UR-5182	1.84552		-1.69492
21UR-5185		-2.08333	-3.22581
21UR-5213			-2
21UR-5216		-5	-5
21UR-5225	-4.62
21UR-5230	1.39026		-1.36986
21UR-5231		-5.55556	-4
21UR-5236		-1.85185	-1.78571
21UR-524	-2.25628
21UR-528	-1.96596		-2.17391
21UR-5282	2.405
21UR-5288			-2.5641
21UR-531	-1.78		-1.47059
21UR-5311	-1.26535		-2.12766
21UR-5312	-3.1416		-1.72414
21UR-5323	-1.2893	-1.26582	-2.17391
21UR-5324			2.04
21UR-5329	1.39118	-1.75439	-1.75439
21UR-5350	-1.66031		-1.72414
21UR-5357	-1.24476	-1.75439	-2.12766
21UR-5361		2.97	3.82
21UR-537	1.88621		-2.04082
21UR-538		-1.53846	-2.04082
21UR-5381		-1.42857	-1.72414
21UR-5387	-2.26162		-1.75439
21UR-5390			-2.27273
21UR-5395		-1.69492	-1.40845
21UR-5401	-2.23034
21UR-5415	-5.28
21UR-5442			-3.125
21UR-5445	-2.21375
21UR-5453			-3.125
21UR-5454	-1.88071	-2.7027
21UR-5464	-1.34614		-1.2987
21UR-5468	-2.29827
21UR-5472	-1.48909	-2.94118
21UR-548			-3.57143
21UR-5485	3.4632
21UR-5492		-1.72414	-1.92308
21UR-5503		-1.28205	-1.66667
21UR-5515	2.48196		-1.35135
21UR-5516			-3.57143
21UR-552		-1.26582	-1.92308
21UR-5520	-1.53336	-1.53846
21UR-5536	-2.59519
21UR-554	1.82916		-1.5873
21UR-5541			-2.32558
21UR-5550			-2.63158
21UR-5556		-1.75439	-2.17391
21UR-5560	-2.772		-2.17391
21UR-5565		-1.36986	-1.36986
21UR-5594			-3.57143
21UR-5595		2.85
21UR-5596	-1.46816	-2.12766	-1.49254
21UR-5597	-1.21169		-1.53846
21UR-5601	-16.17
21UR-5614			-2.12766
21UR-562	-1.91618	-1.5873	-1.75439
21UR-5624	-9.24	-5	-5
21UR-5630	1.8278		-2.17391
21UR-5637	-2.94
21UR-5648	-1.54	-1.25	-1.66667
21UR-5651			-4
21UR-5662			-2.63158
21UR-5677		-5
21UR-5682		-2.7027
21UR-569	1.60428		-1.51515
21UR-57	1.98741		-1.42857
21UR-5703			-4.34783
21UR-5705	-2.66975
21UR-5706	-1.71392	-1.53846	-1.6129
21UR-5711		-1.69492	-3.7037
21UR-5714		-1.53846	-1.2987
21UR-5727	-2.03232
21UR-5728		1.35	-1.75439
21UR-5738		-6.66667	-7.69231
21UR-5745	1.77308		-1.69492
21UR-5755		-1.75439	-1.49254
21UR-5768	-3.15	-2.17391	-1.81818
21UR-5778		-1.96078	-2.12766
21UR-5785	2.5493
21UR-5802	2.0278		-1.92308
21UR-5803			-2.43902
21UR-5833	2.00989		-1.75439
21UR-5834			-4
21UR-5846			-2.5
21UR-5848	-16.17
21UR-5849			-5
21UR-5852	-3.19846	4.76	5.1
21UR-5886	2.47965
21UR-5901	-1.55878	-1.78571	-1.75439
21UR-5904		-2.38095	-3.33333
21UR-5906		-6.66667
21UR-5919			-2.27273
21UR-5943		3.57
21UR-5948			-4
21UR-5954	-1.87	-1.49254	-1.81818
21UR-5965		-2.5
21UR-5982	-11.55
21UR-6002	2.20215	-1.88679
21UR-6007		-1.44928	-1.72414
21UR-6009		-1.5873	-1.63934
21UR-601			-3.22581
21UR-602	2.40968	1.2	-1.25
21UR-6025		7.13
21UR-6047			-12.5
21UR-6048			-2.5641
21UR-6053			-2.04082
21UR-6058		-2.17391
21UR-6059	4.7619		2.13
21UR-6067		2.97
21UR-6085	-1.51222	-1.51515	-1.75439
21UR-6089	1.27718	-1.36986	-1.47059
21UR-6090			-2.94118
21UR-6091	3.4632	-3.125	-3.22581
21UR-6094	-1.66158		-1.49254
21UR-6096	-2.2176
21UR-6101	2.28392
21UR-6106	2.34037
21UR-6108	-6.16
21UR-6132			-2.22222
21UR-6167		-2.5	-2.94118
21UR-6169	-1.9775	-1.75439	-2
21UR-6176			-2.43902
21UR-6178		-2.17391	-1.78571
21UR-618			-2.22222
21UR-619	-7.392
21UR-6193			-2.5641
21UR-6194	-2.57654
21UR-6195	-4.62
21UR-6197			4.42
21UR-620		-3.33333	-1.6129
21UR-6221	4.97835		-5.88235
21UR-6222			-5
21UR-6254	-2.09512		-1.63934
21UR-6257	13
21UR-6258		-3.7037	-6.25
21UR-6262	2.00216		-1.72414
21UR-6264	-15.4592
21UR-628		-1.31579	-1.53846
21UR-6284	-2.45438
21UR-6303	-2.25978
21UR-6314		-1.72414	-1.53846
21UR-632			-4
21UR-6329	5.41126
21UR-6333			-6.66667
21UR-6338			7.14
21UR-6346	-3.465
21UR-635	-2.0414
21UR-6350		-4
21UR-6356		-3.125	-3.57143
21UR-6374		-2.17391
21UR-6378	-5.544
21UR-6388		-1.53846	-2.43902
21UR-6400	-2.10618
21UR-6408	-1.54531	-1.28205	-1.36986
21UR-6409		-1.72414	-2
21UR-6419	-3.542		-2.08333
21UR-6421			-7.14286
21UR-6424	-1.56906		-1.40845
21UR-6431	-2.76309		-3.22581
21UR-6433	-1.48293	-1.5873	-1.66667
21UR-6449		5.35
21UR-6475		-1.5625	-2
21UR-6477		4.76
21UR-6501	-2.18167	-1.5625
21UR-6503	-4.62
21UR-6508	-9.24
21UR-652		-5
21UR-6532		-2.04082
21UR-6537		-2.17391	-1.40845
21UR-6543		-4.16667
21UR-6563			7.14
21UR-6571		-2.5
21UR-6581	2.39641		-1.96078
21UR-6601		5.94
21UR-6615	-1.62324		2.14
21UR-6636		5.35
21UR-6645	1.4234		-2.5
21UR-6663			-2.5641
21UR-6665	-9.24
21UR-6682	-2.2275
21UR-6708	-3.85
21UR-672			-2.94118
21UR-6723		-1.81818	-2.04082
21UR-6729		-2.17391
21UR-6750	-1.87312		-1.40845
21UR-6753	-2.41043	4.76
21UR-6774	-3.465
21UR-6785	1.27914		-1.78571
21UR-6805	-5.544
21UR-681	4.7619
21UR-6814		-1.33333	-1.72414
21UR-6815		-3.0303	-2.94118
21UR-6818	-1.28896	-1.35135	-1.96078
21UR-6834	3.30579	-3.33333	-2.94118
21UR-6845	2.886		-1.51515
21UR-6858	1.51829	-1.63934
21UR-687			-5
21UR-6873		-5.88235
21UR-6887	-13.86
21UR-6893	-2.09344
21UR-691			-2.32558
21UR-6940	-13.86
21UR-6948	-11.55
21UR-6953	1.83105		-1.42857
21UR-6974			-2.17391
21UR-6978			-3.125
21UR-6987	-2.09677		-1.88679
21UR-6991	1.37951	-1.51515	-1.69492
21UR-6997			-2.43902
21UR-7015	-2.8875	-2.5
21UR-7030	-5.39
21UR-7032			-2.12766
21UR-7043		3.27
21UR-705	1.40483		-1.47059
21UR-7056	2.40334		2.43
21UR-707			-2.77778
21UR-7070		1.26	-1.63934
21UR-7072		-4.16667
21UR-7079	-2.23034
21UR-710	-4.3187
21UR-711			-2.12766
21UR-7118			-7.69231
21UR-7129	-1.25699	-1.47059	-1.31579
21UR-7142	-1.722	-1.47059	-1.63934
21UR-716			-3.22581
21UR-7174		-1.42857	-1.69492
21UR-7193		-1.49254	-2.77778
21UR-7194	1.54722	-1.88679	-1.26582
21UR-7205		-2.5
21UR-7208	1.23336	-1.35135	-2.04082
21UR-7244		-5.88235
21UR-7249		-5
21UR-7253	-2.7571
21UR-7255	-1.55292	-1.51515	-1.47059
21UR-7266	-13.86
21UR-7288		4.76
21UR-7315	-9.24
21UR-7386			-4.16667
21UR-7391			-2.38095
21UR-7392		-4
21UR-7393	-4.13875
21UR-7405		7.13	6.12
21UR-7463		-1.26582	-1.5873
21UR-7464		-7.14286
21UR-7496			-5
21UR-7498	-2.54625	-3.44828	-1.88679
21UR-7510		-4.16667	-3.22581
21UR-7535		-1.5625	-1.81818
21UR-7546		-5
21UR-7559	-2.05333
21UR-7560	28
21UR-7562		-1.38889	-1.63934
21UR-7575	-4.62
21UR-7579	-2.13708	-1.31579	-1.51515
21UR-7604	-1.32394	-1.35135	-1.6129
21UR-7610		-9.09091
21UR-7616	2.04082	2.58
21UR-7623	1.7316		-1.88679
21UR-7645	-1.33757	-1.42857
21UR-7654	1.63111	-1.2987	-1.40845
21UR-7659		-1.5625	-2.22222
21UR-7666			-2.17391
21UR-7673	-2.695		-4.16667
21UR-7677	-6.16	-6.66667
21UR-7702			-2.63158
21UR-773		-2.85714
21UR-7735	-2.31
21UR-7737	-1.50754		-1.35135
21UR-7750	-3.28263
21UR-7753		-6.66667	-7.69231
21UR-7761		-2.08333
21UR-7764			-2.5641
21UR-777	-16.17
21UR-7772			-2.32558
21UR-7785		-6.25
21UR-7790		-5.88235
21UR-7812		-5.88235
21UR-7819		-1.51515	-2.7027
21UR-782	4.6176
21UR-7829	-2.63667	1.5	-1.51515
21UR-7831	3.10245
21UR-7848	-2.45438
21UR-785		-2.94118
21UR-7876			-3.7037
21UR-79	1.85102		-1.51515
21UR-7916	-3.465
21UR-7940	-3.234
21UR-798	-1.91908	-1.63934	-1.6129
21UR-7987			-2.04082
21UR-7988	-6.3525
21UR-8044		-7.14286	-7.14286
21UR-8059			-5
21UR-806	-2.13675
21UR-8109		-2
21UR-8114			-3.57143
21UR-8141	2.81385	-1.38889	-1.72414
21UR-8144	1.93362		-1.51515
21UR-8148	-2.03194		-1.78571
21UR-817		4.76
21UR-8188	-2.2	-2.63158	-1.96078
21UR-819			-9.09091
21UR-82			-2.08333
21UR-8227	-2.45438
21UR-8229	2.92208		-9.09091
21UR-8240	-1.4869	-1.42857	-1.35135
21UR-8243			2.17
21UR-8265		7.13
21UR-8268		-3.125
21UR-8274			-5
21UR-8277		2.38
21UR-8285	-2.54352
21UR-83			-3.22581
21UR-8302		-2.7027	-4
21UR-8310		-1.2987	-1.66667
21UR-8314		4.76	5.1
21UR-8327			7.14
21UR-8328		-2.08333	-1.72414
21UR-835	7.79221
21UR-8358	5.62771	2.66
21UR-8365	2.0475		-1.85185
21UR-837			-5.88235
21UR-8378			-4
21UR-8392		-2.08333
21UR-8402		2.05
21UR-8403	-1.50857		-1.2987
21UR-8405		-2.94118
21UR-841	11.2554		-2.12766
21UR-842		-3.125
21UR-8425	2.03953		-1.44928
21UR-8427		-7.69231
21UR-8430	11.2554		-2.5641
21UR-8436		-8.33333	-5
21UR-8451			4.59
21UR-8458		5.15
21UR-8465		-1.38889	-1.66667
21UR-8472		-1.44928	-1.72414
21UR-849		-1.49254	-1.66667
21UR-8496			-2.94118
21UR-8497		-2.32558
21UR-85	1.47186	-1.33333	-1.63934
21UR-8509	-2.09344
21UR-8536			-2.63158
21UR-8542	-2.20428	-1.51515
21UR-8544	-2.86
21UR-8602	-2.01056
21UR-8606			7.14
21UR-8608		-1.5625	-2
21UR-8611	-2.74068	-1.49254
21UR-864		-1.23457	-1.53846
21UR-8645			-2.5
21UR-8660	-2.13231	-2.5
21UR-8662	-2.1
21UR-8666	4.00433
21UR-8694	-5.1975
21UR-8725	1.33333		-1.35135
21UR-8749		8.32
21UR-877	-1.75241		-1.96078
21UR-8770	-2.21375
21UR-8787	-4.235
21UR-8795	-1.62966		-1.51515
21UR-8810			-3.57143
21UR-8835		7.13
21UR-8849			-6.25
21UR-8934	-2.365	-2.5
21UR-895		-1.5873	-1.92308
21UR-8969			-5
21UR-8984			-2.04082
21UR-9015	-2.982		-3.125
21UR-9020	-4.39279
21UR-9021	3.67965
21UR-9034			3.31
21UR-9050			-7.14286
21UR-908	1.2698		-1.63934
21UR-9089		-4.7619
21UR-9096		3.57
21UR-9122	-1.81176	-1.63934	-1.40845
21UR-9126		-1.63934	-2.04082
21UR-9128		-5.88235
21UR-9134		5.94
21UR-9157	8.65801
21UR-918	-5.775
21UR-9195	-1.55711		-1.5625
21UR-9206		-1.35135	-1.72414
21UR-9212	-5.775
21UR-923	-2.625	-2.08333	-1.81818
21UR-9246		4.76
21UR-9248			-2.12766
21UR-9259			-3.22581
21UR-9273		-1.49254	-1.75439
21UR-9333	-9.24
21UR-9347			-2.85714
21UR-9373			-5
21UR-9383		4.76
21UR-94	5.14069
21UR-9402		-3.125	-3.57143
21UR-9414			-3.7037
21UR-9434	15
21UR-9441		-5.88235
21UR-9473	4.7619
21UR-9481	2.08579	-1.38889
21UR-9505	-2.58176	-2
21UR-9525	-2.54692	-1.96078	-2.27273
21UR-9553	2.06313	-1.26582	-1.66667
21UR-9584			-3.22581
21UR-9586	-2.31
21UR-960	6.06061
21UR-9605			-2.22222
21UR-9610	-1.65184		-1.5625
21UR-9611		-2.08333	-1.96078
21UR-9612	-9.24
21UR-9647		-1.69492	-2.38095
21UR-9679	2.63203
21UR-9692	-6.16	-3.33333
21UR-970	-3.85
21UR-9740		5.94	5.1
21UR-975	-2.00829		-1.85185
21UR-9759			-3.125
21UR-976		7.13	6.12
21UR-9783		-1.96078	-1.81818
21UR-9799			-3.33333
21UR-9811		-1.21951	-2.32558
21UR-9842	-2.12763		-2.5641
21UR-9843	2.57564	-1.96078	-2.17391
21UR-9849	1.40785	-1.96078
21UR-9857		-1.69492	-2.08333
21UR-9880			-3.7037
21UR-9881	2.07792		-1.81818
21UR-9906	-4.62
21UR-9929	-4.235
21UR-9933			-3.0303
21UR-9939		-1.81818	-1.92308
21UR-994	-5.775
21UR-9959			7.14
21UR-9980	1.79654	-2.5
21UR-9992		2.14
